# Supplementary material for: Elucidating the cellular response of silver nanoparticles as a potential combinatorial agent for cisplatin chemotherapy
Source: PubMed Central journal article supplement (PMC7654574; doi:10.1186/s12951-020-00719-x), 2020-11-10
Supplement: 12951_2020_719_MOESM2_ESM.pdf [file 12951_2020_719_MOESM2_ESM.pdf]

**Elucidating the cellular response of silver nanoparticles as a potential combinatorial agent for cisplatin chemotherapy**

**Additional File 2**

List of proteins deregulated in HepG2 cells after 24h exposure to AgNP 3.5 ug/mL..... pages 1 – 25

List of proteins deregulated in HepG2 cells after 24h exposure to CDDP 10 µM..... pages 26 – 46

List of proteins deregulated in HepG2 cells after 24h exposure to AgNP 3.5 ug/mL + CDDP 10 µM ..... pages 47 – 110

**List of proteins deregulated in HepG2 cells after 24h exposure to AgNP 3.5 ug/mL**

| ID       | Symbol  | Expr Log Ratio | Entrez Gene Name                                     |
|----------|---------|----------------|------------------------------------------------------|
| Q9NQ94   | A1CF    | -0.202         | APOBEC1 complementation factor                       |
| P01023   | A2M     | -0.225         | alpha-2-macroglobulin                                |
| Q86V21-1 | AACS    | -0.191         | acetoacetyl-CoA synthetase                           |
| Q2M2I8   | AAK1    | 0.19           | AP2 associated kinase 1                              |
| Q9NY61   | AATF    | 0.171          | apoptosis antagonizing transcription factor          |
| P33527   | ABCC1   | 0.254          | ATP binding cassette subfamily C member 1            |
| Q96IU4   | ABHD14B | -0.231         | abhydrolase domain containing 14B                    |
| Q8TB40   | ABHD4   | 0.417          | abhydrolase domain containing 4                      |
| P09110-1 | ACAA1   | -0.182         | acetyl-CoA acyltransferase 1                         |
| Q13085-4 | ACACA   | -0.19          | acetyl-CoA carboxylase alpha                         |
| P49748-3 | ACADVL  | 0.251          | acyl-CoA dehydrogenase very long chain               |
| Q9BWD1   | ACAT2   | -0.344         | acetyl-CoA acetyltransferase 2                       |
| P21399   | ACO1    | -0.154         | aconitase 1                                          |
| Q9Y305   | ACOT9   | 0.237          | acyl-CoA thioesterase 9                              |
| P24666   | ACP1    | -0.145         | acid phosphatase 1                                   |
| O60488-1 | ACSL4   | -0.4           | acyl-CoA synthetase long chain family member 4       |
| Q9ULC5-3 | ACSL5   | 0.416          | acyl-CoA synthetase long chain family member 5       |
| Q9NR19-2 | ACSS2   | -0.298         | acyl-CoA synthetase short chain family member 2      |
| P42025   | ACTR1B  | -0.393         | actin related protein 1B                             |
| Q03154-1 | ACY1    | -0.307         | aminoacylase 1                                       |
| P78536   | ADAM17  | 0.137          | ADAM metallopeptidase domain 17                      |
| P35611-3 | ADD1    | -0.247         | adducin 1                                            |
| Q9UEY8-2 | ADD3    | -0.249         | adducin 3                                            |
| P08319-2 | ADH4    | -0.355         | alcohol dehydrogenase 4 (class II), pi polypeptide   |
| P11766   | ADH5    | -0.271         | alcohol dehydrogenase 5 (class III), chi polypeptide |
| P28332-2 | ADH6    | -0.333         | alcohol dehydrogenase 6 (class V)                    |
| Q9BV57   | ADI1    | -0.289         | acireductone dioxygenase 1                           |
| P55263   | ADK     | -0.28          | adenosine kinase                                     |
| Q9H2P0   | ADNP    | 0.193          | activity dependent neuroprotector homeobox           |
| Q16186   | ADRM1   | 0.236          | adhesion regulating molecule 1                       |
| P30566   | ADSL    | -0.245         | adenylosuccinate lyase                               |
| Q9UHB7-1 | AFF4    | 0.172          | AF4/FMR2 family member 4                             |
| P02771   | AFP     | -0.245         | alpha fetoprotein                                    |
| O95081   | AGFG2   | -0.119         | ArfGAP with FG repeats 2                             |
| Q9UKV8   | AGO2    | 0.163          | argonaute RISC catalytic component 2                 |
| O00468   | AGRN    | -0.279         | agrin                                                |
| P01019   | AGT     | -0.564         | angiotensinogen                                      |
| P23526-1 | AHCY    | -0.231         | adenosylhomocysteinase                               |
| P00568   | AK1     | -0.258         | adenylate kinase 1                                   |

|                 |          |        |                                                              |
|-----------------|----------|--------|--------------------------------------------------------------|
| <b>Q02952-1</b> | AKAP12   | 1.337  | A-kinase anchoring protein 12                                |
| <b>Q02040-1</b> | AKAP17A  | 0.224  | A-kinase anchoring protein 17A                               |
| <b>O43823</b>   | AKAP8    | 0.182  | A-kinase anchoring protein 8                                 |
| <b>Q9ULX6</b>   | AKAP8L   | 0.208  | A-kinase anchoring protein 8 like                            |
| <b>P14550</b>   | AKR1A1   | -0.204 | aldo-keto reductase family 1 member A1                       |
| <b>O60218</b>   | AKR1B10  | 0.146  | aldo-keto reductase family 1 member B10                      |
| <b>P51857</b>   | AKR1D1   | -0.229 | aldo-keto reductase family 1 member D1                       |
| <b>P31749</b>   | AKT1     | -0.145 | AKT serine/threonine kinase 1                                |
| <b>P13716-2</b> | ALAD     | -0.293 | aminolevulinate dehydratase                                  |
| <b>P13196</b>   | ALAS1    | 0.702  | 5'-aminolevulinate synthase 1                                |
| <b>P02768</b>   | ALB      | -0.414 | albumin                                                      |
| <b>P02769</b>   | ALB      | 0.709  | albumin                                                      |
| <b>Q8IZ83</b>   | ALDH16A1 | -0.165 | aldehyde dehydrogenase 16 family member A1                   |
| <b>P00352</b>   | ALDH1A1  | -0.274 | aldehyde dehydrogenase 1 family member A1                    |
| <b>P09972</b>   | ALDOC    | -0.179 | aldolase, fructose-bisphosphate C                            |
| <b>Q9Y673</b>   | ALG5     | 0.142  | ALG5 dolichyl-phosphate beta-glucosyltransferase             |
| <b>Q86V81</b>   | ALYREF   | 0.209  | Aly/REF export factor                                        |
| <b>Q9H1A4</b>   | ANAPC1   | -0.103 | anaphase promoting complex subunit 1                         |
| <b>Q9P2R3-4</b> | ANKFY1   | -0.234 | ankyrin repeat and FYVE domain containing 1                  |
| <b>Q9NQW6</b>   | ANLN     | 0.174  | anillin actin binding protein                                |
| <b>Q92688</b>   | ANP32B   | -0.174 | acidic nuclear phosphoprotein 32 family member B             |
| <b>P15144</b>   | ANPEP    | -0.14  | alanyl aminopeptidase, membrane                              |
| <b>P07355-2</b> | ANXA2    | 0.479  | annexin A2                                                   |
| <b>P09525</b>   | ANXA4    | -0.277 | annexin A4                                                   |
| <b>P08758</b>   | ANXA5    | -0.211 | annexin A5                                                   |
| <b>P08133</b>   | ANXA6    | -0.304 | annexin A6                                                   |
| <b>Q10567</b>   | AP1B1    | -0.135 | adaptor related protein complex 1 subunit beta 1             |
| <b>O43747</b>   | AP1G1    | -0.18  | adaptor related protein complex 1 subunit gamma 1            |
| <b>P61966</b>   | AP1S1    | -0.139 | adaptor related protein complex 1 subunit sigma 1            |
| <b>P63010-2</b> | AP2B1    | -0.165 | adaptor related protein complex 2 subunit beta 1             |
| <b>O00203</b>   | AP3B1    | -0.107 | adaptor related protein complex 3 subunit beta 1             |
| <b>O14617-5</b> | AP3D1    | -0.167 | adaptor related protein complex 3 subunit delta 1            |
| <b>P13798</b>   | APEH     | -0.264 | acylaminoacyl-peptide hydrolase                              |
| <b>P02647</b>   | APOA1    | -0.51  | apolipoprotein A1                                            |
| <b>P04114</b>   | APOB     | -0.435 | apolipoprotein B                                             |
| <b>P02649</b>   | APOE     | -0.248 | apolipoprotein E                                             |
| <b>O14791-2</b> | APOL1    | -0.318 | apolipoprotein L1                                            |
| <b>Q6UXV4</b>   | APOOL    | 0.191  | apolipoprotein O like                                        |
| <b>P07741</b>   | APRT     | -0.221 | adenine phosphoribosyltransferase                            |
| <b>O60306</b>   | AQR      | 0.166  | aquarius intron-binding spliceosomal factor                  |
| <b>Q96P48-6</b> | ARAP1    | -0.109 | ArfGAP with RhoGAP domain, ankyrin repeat and PH domain 1    |
| <b>P48444</b>   | ARCN1    | -0.099 | archain 1                                                    |
| <b>P84085</b>   | ARF5     | -0.175 | ADP ribosylation factor 5                                    |
| <b>Q9Y6D5</b>   | ARFGEF2  | -0.198 | ADP ribosylation factor guanine nucleotide exchange factor 2 |
| <b>P78540</b>   | ARG2     | 0.22   | arginase 2                                                   |
| <b>Q07960</b>   | ARHGAP1  | -0.163 | Rho GTPase activating protein 1                              |
| <b>Q8N392</b>   | ARHGAP18 | -0.206 | Rho GTPase activating protein 18                             |

|          |          |        |                                                                                    |
|----------|----------|--------|------------------------------------------------------------------------------------|
| Q13017-1 | ARHGAP5  | 0.252  | Rho GTPase activating protein 5                                                    |
| Q92974   | ARHGEF2  | 0.374  | Rho/Rac guanine nucleotide exchange factor 2                                       |
| Q99856   | ARID3A   | -0.188 | AT-rich interaction domain 3A                                                      |
| Q8IVW6   | ARID3B   | 0.209  | AT-rich interaction domain 3B                                                      |
| P40616   | ARL1     | -0.133 | ADP ribosylation factor like GTPase 1                                              |
| P36405   | ARL3     | -0.163 | ADP ribosylation factor like GTPase 3                                              |
| Q6NXE6-1 | ARMC6    | -0.26  | armadillo repeat containing 6                                                      |
| Q5T2E6   | ARMH3    | -0.172 | armadillo like helical domain containing 3                                         |
| Q9H993   | ARMT1    | -0.207 | acidic residue methyltransferase 1                                                 |
| Q92747   | ARPC1A   | 0.133  | actin related protein 2/3 complex subunit 1A                                       |
| O15145   | ARPC3    | -0.172 | actin related protein 2/3 complex subunit 3                                        |
| P15848   | ARSB     | -0.237 | arylsulfatase B                                                                    |
| Q13510-2 | ASAH1    | -0.174 | N-acylsphingosine amidohydrolase 1                                                 |
| P07306   | ASGR1    | -0.359 | asialoglycoprotein receptor 1                                                      |
| P07307   | ASGR2    | -0.332 | asialoglycoprotein receptor 2                                                      |
| P04424   | ASL      | -0.207 | argininosuccinate lyase                                                            |
| P08243   | ASNS     | 0.181  | asparagine synthetase (glutamine-hydrolyzing)                                      |
| Q12797   | ASPH     | 0.289  | aspartate beta-hydroxylase                                                         |
| Q7L266   | ASRGL1   | -0.266 | asparaginase and isoaspartyl peptidase 1                                           |
| P00966   | ASS1     | -0.398 | argininosuccinate synthase 1                                                       |
| Q8NBU5   | ATAD1    | 0.271  | ATPase family AAA domain containing 1                                              |
| P18847   | ATF3     | 0.773  | activating transcription factor 3                                                  |
| P31939   | ATIC     | -0.177 | 5-aminoimidazole-4-carboxamide ribonucleotide formyltransferase/IMP cyclohydrolase |
| P05023   | ATP1A1   | 0.1    | ATPase Na <sup>+</sup> /K <sup>+</sup> transporting subunit alpha 1                |
| P05026   | ATP1B1   | 0.291  | ATPase Na <sup>+</sup> /K <sup>+</sup> transporting subunit beta 1                 |
| P54709   | ATP1B3   | 0.189  | ATPase Na <sup>+</sup> /K <sup>+</sup> transporting subunit beta 3                 |
| P25705-1 | ATP5F1A  | 0.143  | ATP synthase F1 subunit alpha                                                      |
| P48047   | ATP5PO   | 0.202  | ATP synthase peripheral stalk subunit OSCP                                         |
| P61421   | ATP6V0D1 | 0.187  | ATPase H <sup>+</sup> transporting V0 subunit d1                                   |
| Q9UBB4   | ATXN10   | -0.177 | ataxin 10                                                                          |
| P54252   | ATXN3    | 0.578  | ataxin 3                                                                           |
| Q9Y679-1 | AUP1     | 0.139  | AUP1 lipid droplet regulating VLDL assembly factor                                 |
| O14965   | AURKA    | 0.207  | aurora kinase A                                                                    |
| Q96GD4-5 | AURKB    | 0.283  | aurora kinase B                                                                    |
| O43505   | B4GAT1   | -0.466 | beta-1,4-glucuronyltransferase 1                                                   |
| O95817   | BAG3     | 0.653  | BCL2 associated athanogene 3                                                       |
| O95429   | BAG4     | -0.246 | BCL2 associated athanogene 4                                                       |
| Q9UHR4   | BAIAP2L1 | 0.278  | BAR/IMD domain containing adaptor protein 2 like 1                                 |
| Q07812-2 | BAX      | -0.208 | BCL2 associated X, apoptosis regulator                                             |
| Q9NRL2   | BAZ1A    | 0.289  | bromodomain adjacent to zinc finger domain 1A                                      |
| Q9UIF9   | BAZ2A    | 0.244  | bromodomain adjacent to zinc finger domain 2A                                      |
| P50895   | BCAM     | -0.392 | basal cell adhesion molecule (Lutheran blood group)                                |
| P56945-6 | BCAR1    | 0.328  | BCAR1 scaffold protein, Cas family member                                          |
| Q9BUT1   | BDH2     | -0.322 | 3-hydroxybutyrate dehydrogenase 2                                                  |
| Q9NYM9   | BET1L    | -0.254 | Bet1 golgi vesicular membrane trafficking protein like                             |
| Q13867   | BLMH     | -0.178 | bleomycin hydrolase                                                                |
| P53004   | BLVRA    | -0.164 | biliverdin reductase A                                                             |

|                  |             |        |                                                        |
|------------------|-------------|--------|--------------------------------------------------------|
| <b>O95861-2</b>  | BPNT1       | -0.241 | 3'(2'), 5'-bisphosphate nucleotidase 1                 |
| <b>Q7Z569</b>    | BRAP        | 0.125  | BRCA1 associated protein                               |
| <b>Q15059</b>    | BRD3        | -0.243 | bromodomain containing 3                               |
| <b>Q8TDN6</b>    | BRIX1       | 0.26   | biogenesis of ribosomes BRX1                           |
| <b>Q5VW32</b>    | BROX        | -0.191 | BRO1 domain and CAAX motif containing                  |
| <b>P35613</b>    | BSG         | -0.167 | basigin (Ok blood group)                               |
| <b>Q96K17</b>    | BTF3L4      | -0.247 | basic transcription factor 3 like 4                    |
| <b>Q7KYR7</b>    | BTN2A1      | 0.28   | butyrophilin subfamily 2 member A1                     |
| <b>O43683</b>    | BUB1        | 0.182  | BUB1 mitotic checkpoint serine/threonine kinase        |
| <b>O60566-3</b>  | BUB1B       | 0.123  | BUB1 mitotic checkpoint serine/threonine kinase B      |
| <b>P41223-2</b>  | BUD31       | 0.237  | BUD31 homolog                                          |
| <b>Q13895</b>    | BYSL        | 0.187  | bystin like                                            |
| <b>Q9Y6E2</b>    | BZW2        | -0.226 | basic leucine zipper and W2 domains 2                  |
| <b>Q9H0W9</b>    | C11orf54    | -0.249 | chromosome 11 open reading frame 54                    |
| <b>O00193</b>    | C11orf58    | -0.322 | chromosome 11 open reading frame 58                    |
| <b>Q9H3H3-3</b>  | C11orf68    | -0.136 | chromosome 11 open reading frame 68                    |
| <b>A6NCS6</b>    | C2orf72     | -0.235 | chromosome 2 open reading frame 72                     |
| <b>P01024</b>    | C3          | -0.218 | complement C3                                          |
| <b>Q9BRJ6</b>    | C7orf50     | -0.24  | chromosome 7 open reading frame 50                     |
| <b>Q8IXQ3</b>    | C9orf40     | -0.302 | chromosome 9 open reading frame 40                     |
| <b>Q5T6V5</b>    | C9orf64     | -0.228 | chromosome 9 open reading frame 64                     |
| <b>Q9Y376</b>    | CAB39       | -0.154 | calcium binding protein 39                             |
| <b>Q13557-10</b> | CAMK2D      | -0.158 | calcium/calmodulin dependent protein kinase II delta   |
| <b>Q86VP6-1</b>  | CAND1       | -0.179 | cullin associated and neddylation dissociated 1        |
| <b>P07384</b>    | CAPN1       | -0.138 | calpain 1                                              |
| <b>P47755</b>    | CAPZA2      | -0.196 | capping actin protein of muscle Z-line subunit alpha 2 |
| <b>Q9Y2V2</b>    | CARHSP1     | -0.129 | calcium regulated heat stable protein 1                |
| <b>P35520-2</b>  | CBS/CBSL    | -0.345 | cystathionine beta-synthase                            |
| <b>Q5JTY5</b>    | CBWD3/CBWD6 | -0.133 | COBW domain containing 3                               |
| <b>Q13185</b>    | CBX3        | -0.144 | chromobox 3                                            |
| <b>P45973</b>    | CBX5        | -0.197 | chromobox 5                                            |
| <b>Q96BQ5</b>    | CCDC127     | 0.372  | coiled-coil domain containing 127                      |
| <b>O60826</b>    | CCDC22      | -0.163 | coiled-coil domain containing 22                       |
| <b>Q96A33</b>    | CCDC47      | 0.193  | coiled-coil domain containing 47                       |
| <b>Q16204</b>    | CCDC6       | -0.21  | coiled-coil domain containing 6                        |
| <b>Q9H6F5</b>    | CCDC86      | 0.122  | coiled-coil domain containing 86                       |
| <b>O60563</b>    | CCNT1       | 0.377  | cyclin T1                                              |
| <b>O14618</b>    | CCS         | -0.234 | copper chaperone for superoxide dismutase              |
| <b>Q12834</b>    | CDC20       | 0.23   | cell division cycle 20                                 |
| <b>Q9H3Q1</b>    | CDC42EP4    | -0.342 | CDC42 effector protein 4                               |
| <b>Q6P1J9</b>    | CDC73       | 0.138  | cell division cycle 73                                 |
| <b>P38936</b>    | CDKN1A      | 0.673  | cyclin dependent kinase inhibitor 1A                   |
| <b>Q9NXV6</b>    | CDKN2AIP    | 0.226  | CDKN2A interacting protein                             |
| <b>P49715-4</b>  | CEBPA       | -0.376 | CCAAT enhancer binding protein alpha                   |
| <b>Q03701</b>    | CEBPZ       | 0.186  | CCAAT enhancer binding protein zeta                    |
| <b>Q9UHN6</b>    | CEMIP2      | 0.238  | cell migration inducing hyaluronidase 2                |
| <b>Q9UPN4</b>    | CEP131      | -0.131 | centrosomal protein 131                                |

|                 |         |        |                                                                 |
|-----------------|---------|--------|-----------------------------------------------------------------|
| <b>Q9HA82</b>   | CERS4   | -0.176 | ceramide synthase 4                                             |
| <b>O00748</b>   | CES2    | -0.111 | carboxylesterase 2                                              |
| <b>P41208</b>   | CETN2   | -0.311 | centrin 2                                                       |
| <b>Q9UEE9-1</b> | CFDP1   | -0.377 | craniofacial development protein 1                              |
| <b>P05156</b>   | CFI     | -0.388 | complement factor I                                             |
| <b>Q9Y281-1</b> | CFL2    | -0.306 | cofilin 2                                                       |
| <b>Q9P2M7-1</b> | CGN     | -0.622 | cingulin                                                        |
| <b>Q13111-1</b> | CHAF1A  | -0.155 | chromatin assembly factor 1 subunit A                           |
| <b>Q9NX63</b>   | CHCHD3  | 0.161  | coiled-coil-helix-coiled-coil-helix domain containing 3         |
| <b>O14647</b>   | CHD2    | 0.297  | chromodomain helicase DNA binding protein 2                     |
| <b>Q8IWX8</b>   | CHERP   | 0.132  | calcium homeostasis endoplasmic reticulum protein               |
| <b>Q9UQN3-1</b> | CHMP2B  | 0.128  | charged multivesicular body protein 2B                          |
| <b>Q9H444</b>   | CHMP4B  | 0.138  | charged multivesicular body protein 4B                          |
| <b>Q9UHD1</b>   | CHORDC1 | 0.324  | cysteine and histidine rich domain containing 1                 |
| <b>Q99653</b>   | CHP1    | 0.475  | calcineurin like EF-hand protein 1                              |
| <b>P12277</b>   | CKB     | -0.228 | creatine kinase B                                               |
| <b>P56747</b>   | CLDN6   | 0.275  | claudin 6                                                       |
| <b>Q16740</b>   | CLPP    | 0.173  | caseinolytic mitochondrial matrix peptidase proteolytic subunit |
| <b>O76031</b>   | CLPX    | 0.166  | caseinolytic mitochondrial matrix peptidase chaperone subunit   |
| <b>P09497-2</b> | CLTB    | 0.338  | clathrin light chain B                                          |
| <b>P10909-2</b> | CLU     | 0.489  | clusterin                                                       |
| <b>I3L2B0</b>   | CLUH    | -0.265 | clustered mitochondria homolog                                  |
| <b>O75153</b>   | CLUH    | -0.214 | clustered mitochondria homolog                                  |
| <b>P62633</b>   | CNBP    | -1.217 | CCHC-type zinc finger nucleic acid binding protein              |
| <b>P62633-6</b> | CNBP    | -0.857 | CCHC-type zinc finger nucleic acid binding protein              |
| <b>Q96KP4</b>   | CNDP2   | -0.285 | carnosine dipeptidase 2                                         |
| <b>A5YKK6</b>   | CNOT1   | -0.122 | CCR4-NOT transcription complex subunit 1                        |
| <b>Q9UIV1-1</b> | CNOT7   | -0.194 | CCR4-NOT transcription complex subunit 7                        |
| <b>Q92600</b>   | CNOT9   | -0.198 | CCR4-NOT transcription complex subunit 9                        |
| <b>P09543-1</b> | CNP     | -0.133 | 2',3'-cyclic nucleotide 3' phosphodiesterase                    |
| <b>Q96JB2-1</b> | COG3    | -0.159 | component of oligomeric golgi complex 3                         |
| <b>Q9H9E3</b>   | COG4    | -0.122 | component of oligomeric golgi complex 4                         |
| <b>Q9NX08</b>   | COMMD8  | -0.244 | COMM domain containing 8                                        |
| <b>Q9P000-1</b> | COMMD9  | -0.36  | COMM domain containing 9                                        |
| <b>P53618</b>   | COPB1   | -0.108 | coatamer protein complex subunit beta 1                         |
| <b>P35606</b>   | COPB2   | -0.117 | coatamer protein complex subunit beta 2                         |
| <b>Q9Y678</b>   | COPG1   | -0.121 | coatamer protein complex subunit gamma 1                        |
| <b>P31146</b>   | CORO1A  | -0.261 | coronin 1A                                                      |
| <b>Q14019</b>   | COTL1   | -0.28  | coactosin like F-actin binding protein 1                        |
| <b>O75976</b>   | CPD     | -0.231 | carboxypeptidase D                                              |
| <b>Q17RY0-1</b> | CPEB4   | 0.254  | cytoplasmic polyadenylation element binding protein 4           |
| <b>O75131</b>   | CPNE3   | -0.118 | copine 3                                                        |
| <b>Q9BRF8-1</b> | CPPED1  | -0.283 | calcineurin like phosphoesterase domain containing 1            |
| <b>P46108-1</b> | CRK     | -0.202 | CRK proto-oncogene, adaptor protein                             |
| <b>P46109</b>   | CRKL    | -0.222 | CRK like proto-oncogene, adaptor protein                        |
| <b>O75718</b>   | CRTAP   | -0.153 | cartilage associated protein                                    |
| <b>P02511</b>   | CRYAB   | 2.014  | crystallin alpha B                                              |

|          |          |        |                                                        |
|----------|----------|--------|--------------------------------------------------------|
| Q9Y2S2-1 | CRYL1    | -0.371 | crystallin lambda 1                                    |
| Q08257   | CRYZ     | 0.127  | crystallin zeta                                        |
| P55060   | CSE1L    | -0.226 | chromosome segregation 1 like                          |
| P68400   | CSNK2A1  | 0.164  | casein kinase 2 alpha 1                                |
| P19784   | CSNK2A2  | 0.145  | casein kinase 2 alpha 2                                |
| P01034   | CST3     | -0.426 | cystatin C                                             |
| P04080   | CSTB     | -0.402 | cystatin B                                             |
| P32929   | CTH      | 0.318  | cystathionine gamma-lyase                              |
| Q9NSA3   | CTNNBIP1 | -0.46  | catenin beta interacting protein 1                     |
| Q9NRF8   | CTPS2    | -0.224 | CTP synthase 2                                         |
| Q6PD62   | CTR9     | 0.229  | CTR9 homolog, Paf1/RNA polymerase II complex component |
| P53634   | CTSC     | -0.172 | cathepsin C                                            |
| P09668   | CTSH     | -0.15  | cathepsin H                                            |
| P07711   | CTSL     | 0.38   | cathepsin L                                            |
| Q13616   | CUL1     | -0.137 | cullin 1                                               |
| Q13619-1 | CUL4A    | -0.114 | cullin 4A                                              |
| P00167-1 | CYB5A    | -0.391 | cytochrome b5 type A                                   |
| P99999   | CYCS     | -0.346 | cytochrome c, somatic                                  |
| Q7L576-1 | CYFIP1   | -0.123 | cytoplasmic FMR1 interacting protein 1                 |
| Q07973-1 | CYP24A1  | 0.886  | cytochrome P450 family 24 subfamily A member 1         |
| Q96SQ9-2 | CYP2S1   | 0.314  | cytochrome P450 family 2 subfamily S member 1          |
| Q8TAV3   | CYP2W1   | -0.274 | cytochrome P450 family 2 subfamily W member 1          |
| Q9HBI6   | CYP4F11  | 0.355  | cytochrome P450 family 4 subfamily F member 11         |
| Q16850-1 | CYP51A1  | -0.568 | cytochrome P450 family 51 subfamily A member 1         |
| Q5VWQ8   | DAB2IP   | -0.191 | DAB2 interacting protein                               |
| Q14118   | DAG1     | -0.169 | dystroglycan 1                                         |
| P51397   | DAP      | -0.419 | death associated protein                               |
| O43293-1 | DAPK3    | 0.198  | death associated protein kinase 3                      |
| P07108-5 | DBI      | -0.743 | diazepam binding inhibitor, acyl-CoA binding protein   |
| P11182   | DBT      | 0.127  | dihydrolipoamide branched chain transacylase E2        |
| Q9NV06   | DCAF13   | 0.179  | DDB1 and CUL4 associated factor 13                     |
| P61962   | DCAF7    | 0.115  | DDB1 and CUL4 associated factor 7                      |
| Q96C86   | DCPS     | -0.231 | decapping enzyme, scavenger                            |
| Q9H773   | DCTPP1   | -0.244 | dCTP pyrophosphatase 1                                 |
| O94760   | DDAH1    | -0.336 | dimethylarginine dimethylaminohydrolase 1              |
| Q16531   | DDB1     | -0.183 | damage specific DNA binding protein 1                  |
| Q5TDH0-3 | DDI2     | -0.307 | DNA damage inducible 1 homolog 2                       |
| Q9NVP1   | DDX18    | 0.162  | DEAD-box helicase 18                                   |
| Q9NUU7   | DDX19A   | -0.146 | DEAD-box helicase 19A                                  |
| Q9NR30   | DDX21    | 0.353  | DEAD-box helicase 21                                   |
| Q9GZR7   | DDX24    | 0.3    | DEAD-box helicase 24                                   |
| Q9H0S4   | DDX47    | 0.183  | DEAD-box helicase 47                                   |
| O43583   | DENR     | -0.303 | density regulated re-initiation and release factor     |
| Q9Y315   | DERA     | -0.171 | deoxyribose-phosphate aldolase                         |
| Q8WYQ5-1 | DGCR8    | 0.18   | DGCR8 microprocessor complex subunit                   |
| Q9UPY3   | DICER1   | -0.154 | dicer 1, ribonuclease III                              |
| O60832   | DKC1     | 0.161  | dyskerin pseudouridine synthase 1                      |

|          |         |        |                                                             |
|----------|---------|--------|-------------------------------------------------------------|
| P09622   | DLD     | 0.206  | dihydrolipoamide dehydrogenase                              |
| P11532-6 | DMD     | -0.175 | dystrophin                                                  |
| Q08495-1 | DMTN    | -0.206 | dematin actin binding protein                               |
| Q86Y56   | DNAAF5  | -0.241 | dynein axonemal assembly factor 5                           |
| P31689   | DNAJA1  | 0.175  | DnaJ heat shock protein family (Hsp40) member A1            |
| P25685   | DNAJB1  | 0.744  | DnaJ heat shock protein family (Hsp40) member B1            |
| Q9NXW2-2 | DNAJB12 | 0.278  | DnaJ heat shock protein family (Hsp40) member B12           |
| P25686-3 | DNAJB2  | 0.316  | DnaJ heat shock protein family (Hsp40) member B2            |
| Q9UDY4   | DNAJB4  | 0.77   | DnaJ heat shock protein family (Hsp40) member B4            |
| Q9Y5T4   | DNAJC15 | 0.309  | DnaJ heat shock protein family (Hsp40) member C15           |
| Q13217   | DNAJC3  | 0.125  | DnaJ heat shock protein family (Hsp40) member C3            |
| Q9H3Z4   | DNAJC5  | -0.427 | DnaJ heat shock protein family (Hsp40) member C5            |
| Q9ULA0   | DNPEP   | -0.217 | aspartyl aminopeptidase                                     |
| O43598-1 | DNP1    | -0.446 | 2'-deoxynucleoside 5'-phosphate N-hydrolase 1               |
| Q5QJE6   | DNTTIP2 | 0.196  | deoxynucleotidyltransferase terminal interacting protein 2  |
| Q9H2P9-5 | DPH5    | -0.397 | diphthamide biosynthesis 5                                  |
| Q9NY33   | DPP3    | -0.132 | dipeptidyl peptidase 3                                      |
| Q16555   | DPYSL2  | -0.258 | dihydropyrimidinase like 2                                  |
| Q8TE96   | DOX1    | -0.199 | DEAQ-box RNA dependent ATPase 1                             |
| Q03001-7 | DST     | 0.231  | dystonin                                                    |
| P60981-1 | DSTN    | 0.149  | destrin, actin depolymerizing factor                        |
| P23919   | DTYMK   | -0.157 | deoxythymidylate kinase                                     |
| Q6P1R4   | DUS1L   | -0.205 | dihydrouridine synthase 1 like                              |
| Q99956   | DUSP9   | -0.277 | dual specificity phosphatase 9                              |
| P33316-3 | DUT     | -0.219 | deoxyuridine triphosphatase                                 |
| P63167   | DYNLL1  | 0.384  | dynein light chain LC8-type 1                               |
| O95905-3 | ECD     | 0.313  | ecdysoneless cell cycle regulator                           |
| P42892   | ECE1    | -0.185 | endothelin converting enzyme 1                              |
| O75521   | ECI2    | 0.096  | enoyl-CoA delta isomerase 2                                 |
| Q9H8V3-3 | ECT2    | 0.196  | epithelial cell transforming 2                              |
| Q9H223   | EHD4    | 0.113  | EH domain containing 4                                      |
| P41567   | EIF1    | 0.156  | eukaryotic translation initiation factor 1                  |
| Q9P2K8-1 | EIF2AK4 | -0.172 | eukaryotic translation initiation factor 2 alpha kinase 4   |
| Q14232   | EIF2B1  | -0.195 | eukaryotic translation initiation factor 2B subunit alpha   |
| Q13144   | EIF2B5  | -0.133 | eukaryotic translation initiation factor 2B subunit epsilon |
| O75822   | EIF3J   | -0.181 | eukaryotic translation initiation factor 3 subunit J        |
| Q9UBQ5   | EIF3K   | -0.249 | eukaryotic translation initiation factor 3 subunit K        |
| P55199   | ELL     | 0.383  | elongation factor for RNA polymerase II                     |
| O00472   | ELL2    | 0.2    | elongation factor for RNA polymerase II 2                   |
| Q14241   | ELOA    | 0.338  | elongin A                                                   |
| O95163   | ELP1    | -0.265 | elongator complex protein 1                                 |
| Q9H9T3   | ELP3    | -0.263 | elongator acetyltransferase complex subunit 3               |
| Q15006   | EMC2    | 0.204  | ER membrane protein complex subunit 2                       |
| Q14249   | ENDOG   | -0.168 | endonuclease G                                              |
| P13929-1 | ENO3    | -0.415 | enolase 3                                                   |
| Q9UHY7   | ENOPH1  | -0.27  | enolase-phosphatase 1                                       |
| P22413   | ENPP1   | -0.179 | ectonucleotide pyrophosphatase/phosphodiesterase 1          |

|                 |          |        |                                                             |
|-----------------|----------|--------|-------------------------------------------------------------|
| <b>O43768-4</b> | ENSA     | -0.311 | endosulfine alpha                                           |
| <b>P16422</b>   | EPCAM    | -0.196 | epithelial cell adhesion molecule                           |
| <b>P29317</b>   | EPHA2    | 0.553  | EPH receptor A2                                             |
| <b>P07099</b>   | EPHX1    | 0.161  | epoxide hydrolase 1                                         |
| <b>P34913</b>   | EPHX2    | -0.242 | epoxide hydrolase 2                                         |
| <b>P58107</b>   | EPPK1    | -0.16  | epiplakin 1                                                 |
| <b>Q12929</b>   | EPS8     | 0.142  | epidermal growth factor receptor pathway substrate 8        |
| <b>Q9H6S3</b>   | EPS8L2   | -0.148 | EPS8 like 2                                                 |
| <b>Q9NZ08-2</b> | ERAP1    | -0.126 | endoplasmic reticulum aminopeptidase 1                      |
| <b>P04626</b>   | ERBB2    | -0.229 | erb-b2 receptor tyrosine kinase 2                           |
| <b>P21860</b>   | ERBB3    | -0.279 | erb-b2 receptor tyrosine kinase 3                           |
| <b>Q96RT1-8</b> | ERBIN    | 0.096  | erbb2 interacting protein                                   |
| <b>P19447</b>   | ERCC3    | 0.239  | ERCC excision repair 3, TFIIH core complex helicase subunit |
| <b>Q9Y282-3</b> | ERGIC3   | 0.157  | ERGIC and golgi 3                                           |
| <b>Q96AP7</b>   | ESAM     | 0.89   | endothelial cell adhesion molecule                          |
| <b>B1AK53-1</b> | ESPN     | -0.556 | espin                                                       |
| <b>P62495</b>   | ETF1     | -0.224 | eukaryotic translation termination factor 1                 |
| <b>Q01780</b>   | EXOSC10  | 0.178  | exosome component 10                                        |
| <b>Q9NQ75</b>   | EXOSC3   | 0.109  | exosome component 3                                         |
| <b>P07148</b>   | FABP1    | -0.658 | fatty acid binding protein 1                                |
| <b>O60427</b>   | FADS1    | -0.198 | fatty acid desaturase 1                                     |
| <b>O95864</b>   | FADS2    | -0.5   | fatty acid desaturase 2                                     |
| <b>Q96CS3</b>   | FAF2     | 0.246  | Fas associated factor family member 2                       |
| <b>P16930</b>   | FAH      | -0.315 | fumarylacetoacetate hydrolase                               |
| <b>Q8IWE2</b>   | FAM114A1 | -0.293 | family with sequence similarity 114 member A1               |
| <b>Q9NZB2-6</b> | FAM120A  | -0.136 | family with sequence similarity 120A                        |
| <b>Q96C01</b>   | FAM136A  | -0.238 | family with sequence similarity 136 member A                |
| <b>Q8N128-2</b> | FAM177A1 | 0.185  | family with sequence similarity 177 member A1               |
| <b>Q9GZU8</b>   | FAM192A  | -0.181 | family with sequence similarity 192 member A                |
| <b>Q52LJ0-2</b> | FAM98B   | 0.108  | family with sequence similarity 98 member B                 |
| <b>Q9NVI1</b>   | FANCI    | -0.226 | FA complementation group I                                  |
| <b>Q9Y285</b>   | FARSA    | -0.131 | phenylalanyl-tRNA synthetase subunit alpha                  |
| <b>Q9NSD9</b>   | FARSB    | -0.201 | phenylalanyl-tRNA synthetase subunit beta                   |
| <b>P25445</b>   | FAS      | 0.158  | Fas cell surface death receptor                             |
| <b>P49327</b>   | FASN     | -0.28  | fatty acid synthase                                         |
| <b>Q7L8L6</b>   | FASTKD5  | 0.463  | FAST kinase domains 5                                       |
| <b>Q14517</b>   | FAT1     | 0.32   | FAT atypical cadherin 1                                     |
| <b>P22087</b>   | FBL      | 0.15   | fibrillarlin                                                |
| <b>Q8TB52</b>   | FBXO30   | 0.215  | F-box protein 30                                            |
| <b>Q9Y311</b>   | FBXO7    | -0.192 | F-box protein 7                                             |
| <b>P55899</b>   | FCGRT    | -0.232 | Fc fragment of IgG receptor and transporter                 |
| <b>P37268</b>   | FDFT1    | -0.332 | farnesyl-diphosphate farnesyltransferase 1                  |
| <b>P14324</b>   | FDPS     | -0.244 | farnesyl diphosphate synthase                               |
| <b>P02671-2</b> | FGA      | -0.626 | fibrinogen alpha chain                                      |
| <b>P02675</b>   | FGB      | -0.281 | fibrinogen beta chain                                       |
| <b>P22455-1</b> | FGFR4    | -0.407 | fibroblast growth factor receptor 4                         |
| <b>P02679</b>   | FGG      | -0.54  | fibrinogen gamma chain                                      |

|          |         |        |                                                                                                   |
|----------|---------|--------|---------------------------------------------------------------------------------------------------|
| Q96AY3   | FKBP10  | -0.137 | FKBP prolyl isomerase 10                                                                          |
| Q9NWM8   | FKBP14  | -0.214 | FKBP prolyl isomerase 14                                                                          |
| P62942   | FKBP1A  | -0.298 | FKBP prolyl isomerase 1A                                                                          |
| Q00688   | FKBP3   | -0.184 | FKBP prolyl isomerase 3                                                                           |
| Q02790   | FKBP4   | 0.235  | FKBP prolyl isomerase 4                                                                           |
| Q9Y5Y0   | FLVCR1  | -0.294 | feline leukemia virus subgroup C cellular receptor 1                                              |
| Q96CP2   | FLYWCH2 | -0.358 | FLYWCH family member 2                                                                            |
| P49326-1 | FMO5    | -0.176 | flavin containing dimethylaniline monooxygenase 5                                                 |
| Q9H479   | FN3K    | -0.254 | fructosamine 3 kinase                                                                             |
| Q9Y2H6   | FNDC3A  | 0.179  | fibronectin type III domain containing 3A                                                         |
| Q5VW36   | FOCAD   | -0.171 | focadhesin                                                                                        |
| P15407   | FOSL1   | 1.156  | FOS like 1, AP-1 transcription factor subunit                                                     |
| Q9H334-8 | FOXP1   | 0.212  | forkhead box P1                                                                                   |
| Q86XX4-2 | FRAS1   | -0.549 | Fraser extracellular matrix complex subunit 1                                                     |
| Q16658   | FSCN1   | -0.121 | fascin actin-bundling protein 1                                                                   |
| O95954-1 | FTCD    | -0.297 | formimidoyltransferase cyclodeaminase                                                             |
| P02792   | FTL     | 0.262  | ferritin light chain                                                                              |
| Q9C0B1-1 | FTO     | -0.252 | FTO alpha-ketoglutarate dependent dioxygenase                                                     |
| P51114   | FXR1    | 0.184  | FMR1 autosomal homolog 1                                                                          |
| P51116   | FXR2    | 0.123  | FMR1 autosomal homolog 2                                                                          |
| P11413-2 | G6PD    | -0.155 | glucose-6-phosphate dehydrogenase                                                                 |
| Q14376   | GALE    | -0.345 | UDP-galactose-4-epimerase                                                                         |
| P51570-2 | GALK1   | -0.225 | galactokinase 1                                                                                   |
| Q96C23   | GALM    | -0.359 | galactose mutarotase                                                                              |
| P07902   | GALT    | -0.213 | galactose-1-phosphate uridylyltransferase                                                         |
| Q14353   | GAMT    | -0.36  | guanidinoacetate N-methyltransferase                                                              |
| P04406   | GAPDH   | -0.169 | glyceraldehyde-3-phosphate dehydrogenase                                                          |
| Q9NY12   | GAR1    | 0.26   | GAR1 ribonucleoprotein                                                                            |
| P22102   | GART    | -0.121 | phosphoribosylglycinamide formyltransferase, phosphoribosylglycinamide synthetase, phosphoribosyl |
| O43903   | GAS2    | -0.159 | growth arrest specific 2                                                                          |
| Q86YP4-3 | GATAD2A | 0.142  | GATA zinc finger domain containing 2A                                                             |
| Q8WX19   | GATAD2B | 0.18   | GATA zinc finger domain containing 2B                                                             |
| P30047   | GCHFR   | -0.268 | GTP cyclohydrolase I feedback regulator                                                           |
| P48506   | GCLC    | 0.381  | glutamate-cysteine ligase catalytic subunit                                                       |
| P48507   | GCLM    | 0.909  | glutamate-cysteine ligase modifier subunit                                                        |
| Q92616   | GCN1    | -0.163 | GCN1 activator of EIF2AK4                                                                         |
| Q8TB36   | GDAP1   | 0.368  | ganglioside induced differentiation associated protein 1                                          |
| Q9NZC3   | GDE1    | 0.299  | glycerophosphodiester phosphodiesterase 1                                                         |
| Q99988   | GDF15   | 0.78   | growth differentiation factor 15                                                                  |
| P50395-1 | GDI2    | -0.233 | GDP dissociation inhibitor 2                                                                      |
| Q7L5D6   | GET4    | -0.118 | guided entry of tail-anchored proteins factor 4                                                   |
| Q06210   | GFPT1   | -0.11  | glutamine--fructose-6-phosphate transaminase 1                                                    |
| Q9H3K2   | GHITM   | 0.335  | growth hormone inducible transmembrane protein                                                    |
| Q9BRX5   | GINS3   | -0.274 | GINS complex subunit 3                                                                            |
| Q9BRT9   | GINS4   | -0.187 | GINS complex subunit 4                                                                            |
| Q8TF65   | GIPC2   | -0.137 | GIPC PDZ domain containing family member 2                                                        |
| P08034   | GJB1    | -0.663 | gap junction protein beta 1                                                                       |

|          |         |        |                                                          |
|----------|---------|--------|----------------------------------------------------------|
| Q92896-2 | GLG1    | -0.332 | golgi glycoprotein 1                                     |
| Q04760-1 | GLO1    | -0.184 | glyoxalase I                                             |
| Q9HC38   | GLOD4   | -0.239 | glyoxalase domain containing 4                           |
| O94925   | GLS     | 0.315  | glutaminase                                              |
| O94925-3 | GLS     | 0.323  | glutaminase                                              |
| Q68CQ7-1 | GLT8D1  | -0.213 | glycosyltransferase 8 domain containing 1                |
| P15104   | GLUL    | -0.32  | glutamate-ammonia ligase                                 |
| O60547   | GMDS    | -0.255 | GDP-mannose 4,6-dehydratase                              |
| Q9Y5P6-2 | GMPPB   | -0.293 | GDP-mannose pyrophosphorylase B                          |
| P49915   | GMPS    | -0.182 | guanine monophosphate synthase                           |
| Q14344   | GNA13   | 0.375  | G protein subunit alpha 13                               |
| P08754   | GNAI3   | 0.145  | G protein subunit alpha i3                               |
| P62873   | GNB1    | 0.166  | G protein subunit beta 1                                 |
| Q13823   | GNL2    | 0.252  | G protein nucleolar 2                                    |
| Q96EK6   | GNPNAT1 | -0.192 | glucosamine-phosphate N-acetyltransferase 1              |
| Q7Z5G4   | GOLGA7  | 0.215  | golgin A7                                                |
| Q9H4A6   | GOLPH3  | -0.182 | golgi phosphoprotein 3                                   |
| Q9H4A5   | GOLPH3L | -0.178 | golgi phosphoprotein 3 like                              |
| Q9Y3E0   | GOLT1B  | 0.339  | golgi transport 1B                                       |
| Q9H8Y8   | GORASP2 | -0.168 | golgi reassembly stacking protein 2                      |
| P00505   | GOT2    | 0.154  | glutamic-oxaloacetic transaminase 2                      |
| Q53EU6   | GPAT3   | 0.448  | glycerol-3-phosphate acyltransferase 3                   |
| P51654-1 | GPC3    | -0.297 | glypican 3                                               |
| Q9Y625   | GPC6    | -0.304 | glypican 6                                               |
| P21695   | GPD1    | -0.376 | glycerol-3-phosphate dehydrogenase 1                     |
| Q9NQX3-2 | GPHN    | -0.242 | gephyrin                                                 |
| P06744   | GPI     | -0.188 | glucose-6-phosphate isomerase                            |
| Q9NQ84-2 | GPRC5C  | 0.451  | G protein-coupled receptor class C group 5 member C      |
| P18283   | GPX2    | -0.395 | glutathione peroxidase 2                                 |
| P36969   | GPX4    | -0.589 | glutathione peroxidase 4                                 |
| Q9UBQ7   | GRHPR   | -0.181 | glyoxylate and hydroxypyruvate reductase                 |
| P25098   | GRK2    | -0.204 | G protein-coupled receptor kinase 2                      |
| P48637   | GSS     | -0.186 | glutathione synthetase                                   |
| P08263   | GSTA1   | -0.502 | glutathione S-transferase alpha 1                        |
| P28161   | GSTM2   | -0.202 | glutathione S-transferase mu 2                           |
| P21266   | GSTM3   | -0.165 | glutathione S-transferase mu 3                           |
| P78417   | GSTO1   | -0.297 | glutathione S-transferase omega 1                        |
| P30711   | GSTT1   | -0.192 | glutathione S-transferase theta 1                        |
| P78347   | GTF2I   | -0.141 | general transcription factor Iii                         |
| Q8N442   | GUF1    | 0.196  | GUF1 homolog, GTPase                                     |
| P0C055   | H2AZ1   | 0.367  | H2A.Z variant histone 1                                  |
| O95479   | H6PD    | -0.135 | hexose-6-phosphate dehydrogenase/glucose 1-dehydrogenase |
| P46952   | HAAO    | -0.222 | 3-hydroxyanthranilate 3,4-dioxygenase                    |
| O14929   | HAT1    | -0.113 | histone acetyltransferase 1                              |
| P51858   | HDGF    | -0.21  | heparin binding growth factor                            |
| Q9HOR4   | HDHD2   | -0.221 | haloacid dehalogenase like hydrolase domain containing 2 |
| Q00341   | HDLBP   | -0.254 | high density lipoprotein binding protein                 |

|          |               |        |                                                                |
|----------|---------------|--------|----------------------------------------------------------------|
| Q7Z4Q2   | HEATR3        | -0.307 | HEAT repeat containing 3                                       |
| Q86XA9   | HEATR5A       | -0.249 | HEAT repeat containing 5A                                      |
| Q9P2D3   | HEATR5B       | -0.128 | HEAT repeat containing 5B                                      |
| Q9NRV9   | HEBP1         | -0.157 | heme binding protein 1                                         |
| Q9Y5Z4   | HEBP2         | -0.288 | heme binding protein 2                                         |
| Q93099   | HGD           | -0.215 | homogentisate 1,2-dioxygenase                                  |
| Q9BTY7   | HGH1          | -0.108 | HGH1 homolog                                                   |
| O14964   | HGS           | 0.203  | hepatocyte growth factor-regulated tyrosine kinase substrate   |
| P49773   | HINT1         | -0.109 | histidine triad nucleotide binding protein 1                   |
| Q9BX68   | HINT2         | 0.19   | histidine triad nucleotide binding protein 2                   |
| Q9BW71-1 | HIRIP3        | -0.18  | HIRA interacting protein 3                                     |
| P08397   | HMBS          | -0.23  | hydroxymethylbilane synthase                                   |
| Q01581   | HMGCS1        | -0.385 | 3-hydroxy-3-methylglutaryl-CoA synthase 1                      |
| P05204   | HMGN2         | 0.517  | high mobility group nucleosomal binding domain 2               |
| P09601   | HMOX1         | 1.109  | heme oxygenase 1                                               |
| P30519   | HMOX2         | 0.128  | heme oxygenase 2                                               |
| P20823-7 | HNF1A         | -0.182 | HNF1 homeobox A                                                |
| P41235-4 | HNF4A         | -0.27  | hepatocyte nuclear factor 4 alpha                              |
| P50135   | HNMT          | -0.44  | histamine N-methyltransferase                                  |
| P14866   | HNRNPL        | 0.1    | heterogeneous nuclear ribonucleoprotein L                      |
| Q00839   | HNRNPU        | 0.164  | heterogeneous nuclear ribonucleoprotein U                      |
| Q1KMD3   | HNRNPUL2      | -0.102 | heterogeneous nuclear ribonucleoprotein U like 2               |
| Q9NSC5   | HOMER3        | -0.246 | homer scaffold protein 3                                       |
| P00738   | HP            | -0.677 | haptoglobin                                                    |
| P32754-1 | HPD           | -0.147 | 4-hydroxyphenylpyruvate dioxygenase                            |
| P07900   | HSP90AA1      | 0.213  | heat shock protein 90 alpha family class A member 1            |
| P08238   | HSP90AB1      | 0.141  | heat shock protein 90 alpha family class B member 1            |
| P48723   | HSPA13        | 0.195  | heat shock protein family A (Hsp70) member 13                  |
| P0DMV9   | HSPA1A/HSPA1B | 1.375  | heat shock protein family A (Hsp70) member 1A                  |
| P17066   | HSPA6         | 1.615  | heat shock protein family A (Hsp70) member 6                   |
| P38646   | HSPA9         | 0.149  | heat shock protein family A (Hsp70) member 9                   |
| P04792   | HSPB1         | 0.759  | heat shock protein family B (small) member 1                   |
| P10809   | HSPD1         | 0.202  | heat shock protein family D (Hsp60) member 1                   |
| Q92598   | HSPH1         | 0.662  | heat shock protein family H (Hsp110) member 1                  |
| P42858   | HTT           | -0.184 | huntingtin                                                     |
| P41252   | IARS1         | -0.15  | isoleucyl-tRNA synthetase 1                                    |
| Q5T440   | IBA57         | 0.131  | iron-sulfur cluster assembly factor IBA57                      |
| O75874   | IDH1          | -0.383 | isocitrate dehydrogenase (NADP(+)) 1                           |
| P50213   | IDH3A         | 0.116  | isocitrate dehydrogenase (NAD(+)) 3 catalytic subunit alpha    |
| O43837   | IDH3B         | 0.169  | isocitrate dehydrogenase (NAD(+)) 3 non-catalytic subunit beta |
| Q13907   | IDI1          | -0.237 | isopentenyl-diphosphate delta isomerase 1                      |
| P08833   | IGFBP1        | 0.492  | insulin like growth factor binding protein 1                   |
| Q8N6C5-4 | IGSF1         | -0.296 | immunoglobulin superfamily member 1                            |
| Q70UQ0-4 | IKBIP         | 0.158  | IKBKB interacting protein                                      |
| Q14116   | IL18          | 0.44   | interleukin 18                                                 |
| Q96G21   | IMP4          | 0.16   | IMP U3 small nucleolar ribonucleoprotein 4                     |
| Q27J81   | INF2          | -0.117 | inverted formin, FH2 and WH2 domain containing                 |

|          |         |        |                                                  |
|----------|---------|--------|--------------------------------------------------|
| Q9UI26-2 | IPO11   | -0.127 | importin 11                                      |
| Q8TEX9-2 | IPO4    | -0.351 | importin 4                                       |
| O00410-3 | IPO5    | -0.317 | importin 5                                       |
| O95373   | IPO7    | -0.15  | importin 7                                       |
| Q96P70   | IPO9    | -0.253 | importin 9                                       |
| Q13576-1 | IQGAP2  | -0.168 | IQ motif containing GTPase activating protein 2  |
| Q86U28   | ISCA2   | -0.212 | iron-sulfur cluster assembly 2                   |
| P05161   | ISG15   | -0.144 | ISG15 ubiquitin like modifier                    |
| Q9H9L3   | ISG20L2 | 0.142  | interferon stimulated exonuclease gene 20 like 2 |
| Q96CN7   | ISOC1   | -0.194 | isochorismatase domain containing 1              |
| Q9NPH2   | ISYNA1  | -0.304 | inositol-3-phosphate synthase 1                  |
| P56199   | ITGA1   | -0.199 | integrin subunit alpha 1                         |
| P17301   | ITGA2   | 0.473  | integrin subunit alpha 2                         |
| P06756   | ITGAV   | 0.153  | integrin subunit alpha V                         |
| P05556   | ITGB1   | 0.25   | integrin subunit beta 1                          |
| P19823   | ITIH2   | -0.115 | inter-alpha-trypsin inhibitor heavy chain 2      |
| Q9BY32   | ITPA    | -0.195 | inosine triphosphatase                           |
| P78504   | JAG1    | 0.61   | jagged canonical Notch ligand 1                  |
| P14923   | JUP     | 0.106  | junction plakoglobin                             |
| Q9Y2K7   | KDM2A   | 0.24   | lysine demethylase 2A                            |
| Q9Y4C1   | KDM3A   | 0.302  | lysine demethylase 3A                            |
| Q7LBC6-1 | KDM3B   | -0.147 | lysine demethylase 3B                            |
| Q14145   | KEAP1   | 0.134  | kelch like ECH associated protein 1              |
| P50053-2 | KHK     | -0.342 | ketohexokinase                                   |
| Q9NQT8   | KIF13B  | -0.161 | kinesin family member 13B                        |
| Q9NS87   | KIF15   | -0.149 | kinesin family member 15                         |
| Q02241-1 | KIF23   | 0.191  | kinesin family member 23                         |
| Q99661   | KIF2C   | 0.153  | kinesin family member 2C                         |
| P33176   | KIF5B   | -0.108 | kinesin family member 5B                         |
| Q9NSK0-3 | KLC4    | -0.221 | kinesin light chain 4                            |
| Q14974   | KPNB1   | -0.226 | karyopherin subunit beta 1                       |
| Q13601   | KRR1    | 0.315  | KRR1 small subunit processome component homolog  |
| P08727   | KRT19   | 0.325  | keratin 19                                       |
| Q16719   | KYNU    | 0.265  | kynureninase                                     |
| P83111-1 | LACTB   | 0.198  | lactamase beta                                   |
| O15230   | LAMA5   | -0.384 | laminin subunit alpha 5                          |
| P55268   | LAMB2   | -0.274 | laminin subunit beta 2                           |
| P13473-3 | LAMP2   | -0.332 | lysosomal associated membrane protein 2          |
| O43813   | LANCL1  | -0.293 | lanC like 1                                      |
| Q71RC2-4 | LARP4   | 0.138  | La ribonucleoprotein domain family member 4      |
| P00338-3 | LDHA    | -0.345 | lactate dehydrogenase A                          |
| P01130   | LDLR    | 0.296  | low density lipoprotein receptor                 |
| Q96PV6-2 | LENG8   | 0.295  | leukocyte receptor cluster member 8              |
| P09382   | LGALS1  | 0.234  | galectin 1                                       |
| P17931   | LGALS3  | -0.207 | galectin 3                                       |
| O00214-2 | LGALS8  | 0.291  | galectin 8                                       |
| Q3ZCW2   | LGALSL  | -0.155 | galectin like                                    |

|           |           |        |                                                        |
|-----------|-----------|--------|--------------------------------------------------------|
| P18858    | LIG1      | -0.287 | DNA ligase 1                                           |
| P20700    | LMNB1     | -0.133 | lamin B1                                               |
| Q7Z4F1    | LRP10     | 0.493  | LDL receptor related protein 10                        |
| Q8N1G4    | LRRC47    | -0.206 | leucine rich repeat containing 47                      |
| Q96AG4    | LRRC59    | 0.138  | leucine rich repeat containing 59                      |
| Q8IWT6    | LRRC8A    | 0.17   | leucine rich repeat containing 8 VRAC subunit A        |
| Q32MZ4-3  | LRRFIP1   | 0.132  | LRR binding FLII interacting protein 1                 |
| Q9UFC0    | LRWD1     | 0.101  | leucine rich repeats and WD repeat domain containing 1 |
| Q9H089    | LSG1      | 0.27   | large 60S subunit nuclear export GTPase 1              |
| P48449    | LSS       | -0.14  | lanosterol synthase                                    |
| P09960-1  | LTA4H     | -0.27  | leukotriene A4 hydrolase                               |
| O94822-3  | LTN1      | -0.15  | listerin E3 ubiquitin protein ligase 1                 |
| Q96GA3    | LTV1      | 0.226  | LTV1 ribosome biogenesis factor                        |
| Q86V48    | LUZP1     | 0.288  | leucine zipper protein 1                               |
| Q8WZA0-2  | LZIC      | -0.241 | leucine zipper and CTNNBIP1 domain containing          |
| Q9NQ48    | LZTFL1    | -0.296 | leucine zipper transcription factor like 1             |
| Q8WXG6-4  | MADD      | 0.201  | MAP kinase activating death domain                     |
| Q9ULX9    | MAFF      | 0.467  | MAF bZIP transcription factor F                        |
| O15525    | MAFG      | 0.715  | MAF bZIP transcription factor G                        |
| Q9Y5V3-2  | MAGED1    | -0.289 | MAGE family member D1                                  |
| P33908    | MAN1A1    | -0.14  | mannosidase alpha class 1A member 1                    |
| P55145    | MANF      | -0.172 | mesencephalic astrocyte derived neurotrophic factor    |
| P46821    | MAP1B     | 0.551  | microtubule associated protein 1B                      |
| A6NCE7    | MAP1LC3B2 | 0.826  | microtubule associated protein 1 light chain 3 beta 2  |
| P27816-1  | MAP4      | -0.124 | microtubule associated protein 4                       |
| Q3KQU3    | MAP7D1    | 0.27   | MAP7 domain containing 1                               |
| P28482    | MAPK1     | -0.272 | mitogen-activated protein kinase 1                     |
| P27361-1  | MAPK3     | -0.233 | mitogen-activated protein kinase 3                     |
| Q5VT66-2  | MARC1     | -0.224 | mitochondrial amidoxime reducing component 1           |
| Q00266    | MAT1A     | -0.316 | methionine adenosyltransferase 1A                      |
| Q8NI22    | MCFD2     | -0.479 | multiple coagulation factor deficiency 2               |
| P49736    | MCM2      | -0.248 | minichromosome maintenance complex component 2         |
| P25205-2  | MCM3      | -0.186 | minichromosome maintenance complex component 3         |
| P33991    | MCM4      | -0.201 | minichromosome maintenance complex component 4         |
| P33992    | MCM5      | -0.179 | minichromosome maintenance complex component 5         |
| Q14566    | MCM6      | -0.211 | minichromosome maintenance complex component 6         |
| P33993-1  | MCM7      | -0.12  | minichromosome maintenance complex component 7         |
| Q9BTE3-1  | MCMBP     | -0.128 | minichromosome maintenance complex binding protein     |
| Q8NE86    | MCU       | 0.322  | mitochondrial calcium uniporter                        |
| P40925-3  | MDH1      | -0.296 | malate dehydrogenase 1                                 |
| Q00987-11 | MDM2      | 0.424  | MDM2 proto-oncogene                                    |
| P51608-2  | MECP2     | 0.201  | methyl-CpG binding protein 2                           |
| Q14696    | MESD      | -0.223 | mesoderm development LRP chaperone                     |
| Q9UBP6    | METTL1    | -0.145 | methyltransferase like 1                               |
| Q9H8H3    | METTL7A   | -0.216 | methyltransferase like 7A                              |
| Q9H1A3    | METTL9    | 0.312  | methyltransferase like 9                               |
| Q8IWA4    | MFN1      | 0.215  | mitofusin 1                                            |

|           |         |        |                                                                                                      |
|-----------|---------|--------|------------------------------------------------------------------------------------------------------|
| P16455    | MGMT    | -0.213 | O-6-methylguanine-DNA methyltransferase                                                              |
| Q8N108-12 | MIER1   | -0.122 | MIER1 transcriptional regulator                                                                      |
| Q9UNW1    | MINPP1  | -0.126 | multiple inositol-polyphosphate phosphatase 1                                                        |
| Q8IVT2    | MISP    | 0.431  | mitotic spindle positioning                                                                          |
| Q15773    | MLF2    | 0.24   | myeloid leukemia factor 2                                                                            |
| P51511    | MMP15   | -0.337 | matrix metalloproteinase 15                                                                          |
| Q96T76-8  | MMS19   | -0.211 | MMS19 homolog, cytosolic iron-sulfur assembly component                                              |
| Q7Z3U7    | MON2    | -0.223 | MON2 homolog, regulator of endosome-to-Golgi trafficking                                             |
| Q15014    | MORF4L2 | -0.204 | mortality factor 4 like 2                                                                            |
| Q9HCE1    | MOV10   | -0.19  | Mov10 RISC complex RNA helicase                                                                      |
| Q9Y5U8    | MPC1    | 0.194  | mitochondrial pyruvate carrier 1                                                                     |
| P34949    | MPI     | -0.26  | mannose phosphate isomerase                                                                          |
| Q5T2T1    | MPP7    | -0.14  | membrane palmitoylated protein 7                                                                     |
| P25325-2  | MPST    | -0.132 | mercaptopyruvate sulfurtransferase                                                                   |
| Q9Y605    | MRFAP1  | -0.313 | Morf4 family associated protein 1                                                                    |
| Q9P015    | MRPL15  | 0.19   | mitochondrial ribosomal protein L15                                                                  |
| Q9P0M9    | MRPL27  | 0.264  | mitochondrial ribosomal protein L27                                                                  |
| P09001    | MRPL3   | 0.209  | mitochondrial ribosomal protein L3                                                                   |
| Q9NYK5    | MRPL39  | 0.158  | mitochondrial ribosomal protein L39                                                                  |
| Q9BRJ2    | MRPL45  | 0.211  | mitochondrial ribosomal protein L45                                                                  |
| Q9BQC6    | MRPL57  | 0.182  | mitochondrial ribosomal protein L57                                                                  |
| Q9Y399    | MRPS2   | 0.256  | mitochondrial ribosomal protein S2                                                                   |
| Q96EL2    | MRPS24  | 0.436  | mitochondrial ribosomal protein S24                                                                  |
| Q9BYN8    | MRPS26  | 0.162  | mitochondrial ribosomal protein S26                                                                  |
| P82673    | MRPS35  | 0.265  | mitochondrial ribosomal protein S35                                                                  |
| P82909    | MRPS36  | 0.136  | mitochondrial ribosomal protein S36                                                                  |
| P82675    | MRPS5   | 0.261  | mitochondrial ribosomal protein S5                                                                   |
| P82932    | MRPS6   | 0.368  | mitochondrial ribosomal protein S6                                                                   |
| Q9Y2R9    | MRPS7   | 0.204  | mitochondrial ribosomal protein S7                                                                   |
| Q9ULH7-5  | MRTFB   | -0.166 | myocardin related transcription factor B                                                             |
| P43246    | MSH2    | -0.192 | mutS homolog 2                                                                                       |
| P52701    | MSH6    | -0.132 | mutS homolog 6                                                                                       |
| P07438    | MT1B    | 3.014  | metallothionein 1B                                                                                   |
| O94776    | MTA2    | 0.215  | metastasis associated 1 family member 2                                                              |
| Q96E29    | MTERF3  | 0.185  | mitochondrial transcription termination factor 3                                                     |
| Q9H019-1  | MTFR1L  | -0.165 | mitochondrial fission regulator 1 like                                                               |
| P11586    | MTHFD1  | -0.253 | methylenetetrahydrofolate dehydrogenase, cyclohydrolase and formyltetrahydrofolate synthetase 1      |
| P13995    | MTHFD2  | 0.186  | methylenetetrahydrofolate dehydrogenase (NADP+ dependent) 2, methenyltetrahydrofolate cyclohydrolase |
| Q13496    | MTM1    | -0.169 | myotubularin 1                                                                                       |
| Q9C0I1    | MTMR12  | -0.195 | myotubularin related protein 12                                                                      |
| Q765P7    | MTSS2   | -0.371 | MTSS I-BAR domain containing 2                                                                       |
| Q5HYI7    | MTX3    | 0.188  | metaxin 3                                                                                            |
| P53602    | MVD     | -0.215 | mevalonate diphosphate decarboxylase                                                                 |
| Q03426    | MVK     | -0.302 | mevalonate kinase                                                                                    |
| Q14764    | MVP     | 0.168  | major vault protein                                                                                  |
| P35579    | MYH9    | 0.319  | myosin heavy chain 9                                                                                 |
| Q15746    | MYLK    | -0.216 | myosin light chain kinase                                                                            |

|                 |         |        |                                                          |
|-----------------|---------|--------|----------------------------------------------------------|
| <b>Q96H55-1</b> | MYO19   | -0.252 | myosin XIX                                               |
| <b>O00159-3</b> | MYO1C   | 0.122  | myosin IC                                                |
| <b>Q6NSJ0</b>   | MYORG   | -0.298 | myogenesis regulating glycosidase (putative)             |
| <b>Q13564-4</b> | NAE1    | -0.166 | NEDD8 activating enzyme E1 subunit 1                     |
| <b>Q9UJ70-2</b> | NAGK    | -0.123 | N-acetylglucosamine kinase                               |
| <b>Q9NR45</b>   | NANS    | -0.231 | N-acetylneuraminate synthase                             |
| <b>O43776</b>   | NARS1   | -0.145 | asparaginyl-tRNA synthetase 1                            |
| <b>P49321-3</b> | NASP    | -0.28  | nuclear autoantigenic sperm protein                      |
| <b>A2RRP1</b>   | NBAS    | -0.129 | NBAS subunit of NRZ tethering complex                    |
| <b>Q15021</b>   | NCAPD2  | -0.122 | non-SMC condensin I complex subunit D2                   |
| <b>Q6PIU2-2</b> | NCEH1   | 0.261  | neutral cholesterol ester hydrolase 1                    |
| <b>Q68D85</b>   | NCR3LG1 | -0.265 | natural killer cell cytotoxicity receptor 3 ligand 1     |
| <b>Q9UI09</b>   | NDUFA12 | 0.103  | NADH:ubiquinone oxidoreductase subunit A12               |
| <b>Q9P0J0</b>   | NDUFA13 | 0.178  | NADH:ubiquinone oxidoreductase subunit A13               |
| <b>O00483</b>   | NDUFA4  | -0.294 | NDUFA4 mitochondrial complex associated                  |
| <b>P56556</b>   | NDUFA6  | 0.162  | NADH:ubiquinone oxidoreductase subunit A6                |
| <b>O14561</b>   | NDUFAB1 | 0.366  | NADH:ubiquinone oxidoreductase subunit AB1               |
| <b>Q8N183</b>   | NDUFAF2 | 0.166  | NADH:ubiquinone oxidoreductase complex assembly factor 2 |
| <b>P28331-2</b> | NDUFS1  | 0.104  | NADH:ubiquinone oxidoreductase core subunit S1           |
| <b>P19404</b>   | NDUFV2  | -0.182 | NADH:ubiquinone oxidoreductase core subunit V2           |
| <b>Q15843</b>   | NEDD8   | -0.268 | NEDD8 ubiquitin like modifier                            |
| <b>Q6NW34</b>   | NEPRO   | 0.218  | nucleolus and neural progenitor protein                  |
| <b>P48681</b>   | NES     | 0.297  | nestin                                                   |
| <b>Q99519</b>   | NEU1    | -0.248 | neuraminidase 1                                          |
| <b>Q00653</b>   | NFKB2   | 0.171  | nuclear factor kappa B subunit 2                         |
| <b>Q9UMS0</b>   | NFU1    | -0.208 | NFU1 iron-sulfur cluster scaffold                        |
| <b>Q6ZNB6-1</b> | NFXL1   | -0.546 | nuclear transcription factor, X-box binding like 1       |
| <b>P14543-1</b> | NID1    | -0.31  | nidogen 1                                                |
| <b>Q9GZT8</b>   | NIF3L1  | -0.168 | NGG1 interacting factor 3 like 1                         |
| <b>Q9NYR9-1</b> | NKIRAS2 | -0.162 | NFKB inhibitor interacting Ras like 2                    |
| <b>O15226-2</b> | NKRF    | 0.207  | NFKB repressing factor                                   |
| <b>Q96D46</b>   | NMD3    | 0.185  | NMD3 ribosome export adaptor                             |
| <b>P22392-2</b> | NME2    | -0.293 | NME/NM23 nucleoside diphosphate kinase 2                 |
| <b>P30419</b>   | NMT1    | -0.161 | N-myristoyltransferase 1                                 |
| <b>Q9ULX3</b>   | NOB1    | 0.191  | NIN1 (RPN12) binding protein 1 homolog                   |
| <b>Q9Y3T9</b>   | NOC2L   | 0.218  | NOC2 like nucleolar associated transcriptional repressor |
| <b>Q9BSC4</b>   | NOL10   | 0.135  | nucleolar protein 10                                     |
| <b>Q9UGY1</b>   | NOL12   | 0.28   | nucleolar protein 12                                     |
| <b>Q96MY1</b>   | NOL4L   | -0.214 | nucleolar protein 4 like                                 |
| <b>Q5C9Z4</b>   | NOM1    | 0.265  | nucleolar protein with MIF4G domain 1                    |
| <b>Q9NPE3</b>   | NOP10   | 0.202  | NOP10 ribonucleoprotein                                  |
| <b>P46087-4</b> | NOP2    | 0.303  | NOP2 nucleolar protein                                   |
| <b>Q9Y2X3</b>   | NOP58   | 0.279  | NOP58 ribonucleoprotein                                  |
| <b>P29474</b>   | NOS3    | 0.249  | nitric oxide synthase 3                                  |
| <b>P55786</b>   | NPEPPS  | -0.157 | aminopeptidase puromycin sensitive                       |
| <b>O43847-2</b> | NRDC    | -0.289 | nardilysin convertase                                    |
| <b>O95478</b>   | NSA2    | 0.274  | NSA2 ribosome biogenesis factor                          |

|          |          |        |                                                                                                        |
|----------|----------|--------|--------------------------------------------------------------------------------------------------------|
| Q8TCD5   | NT5C     | -0.232 | 5', 3'-nucleotidase, cytosolic                                                                         |
| Q5TFE4   | NT5DC1   | -0.228 | 5'-nucleotidase domain containing 1                                                                    |
| Q86UY8   | NT5DC3   | 0.304  | 5'-nucleotidase domain containing 3                                                                    |
| Q8TB37   | NUBPL    | 0.177  | nucleotide binding protein like                                                                        |
| Q9H1E3   | NUCKS1   | -0.293 | nuclear casein kinase and cyclin dependent kinase substrate 1                                          |
| Q8WVJ2   | NUDCD2   | -0.178 | NudC domain containing 2                                                                               |
| Q8IVD9   | NUDCD3   | -0.278 | NudC domain containing 3                                                                               |
| Q96DE0   | NUDT16   | -0.147 | nudix hydrolase 16                                                                                     |
| P50583   | NUDT2    | -0.163 | nudix hydrolase 2                                                                                      |
| Q9UUK9   | NUDT5    | -0.263 | nudix hydrolase 5                                                                                      |
| P49790   | NUP153   | 0.349  | nucleoporin 153                                                                                        |
| P61970   | NUTF2    | -0.232 | nuclear transport factor 2                                                                             |
| P04181   | OAT      | 0.199  | ornithine aminotransferase                                                                             |
| O75147   | OBSL1    | -0.276 | obscurin like cytoskeletal adaptor 1                                                                   |
| O60502   | OGA      | 0.186  | O-GlcNAcase                                                                                            |
| Q6N063-1 | OGFOD2   | -0.214 | 2-oxoglutarate and iron dependent oxygenase domain containing 2                                        |
| Q9NZT2   | OGFR     | -0.104 | opioid growth factor receptor                                                                          |
| Q9NTK5-1 | OLA1     | -0.195 | Obg like ATPase 1                                                                                      |
| Q9H6K4   | OPA3     | 0.419  | outer mitochondrial membrane lipid metabolism regulator OPA3                                           |
| O14841   | OPLAH    | -0.162 | 5-oxoprolinase, ATP-hydrolysing                                                                        |
| Q13415   | ORC1     | 0.462  | origin recognition complex subunit 1                                                                   |
| Q13416   | ORC2     | -0.109 | origin recognition complex subunit 2                                                                   |
| P19652   | ORM2     | -0.421 | orosomucoid 2                                                                                          |
| Q9BZF1-1 | OSBPL8   | 0.175  | oxysterol binding protein like 8                                                                       |
| Q96G74-1 | OTUD5    | 0.323  | OTU deubiquitinase 5                                                                                   |
| Q8N573-1 | OXR1     | -0.269 | oxidation resistance 1                                                                                 |
| Q9NWU1-1 | OXSM     | 0.151  | 3-oxoacyl-ACP synthase, mitochondrial                                                                  |
| Q9BRP4   | PAAF1    | -0.182 | proteasomal ATPase associated factor 1                                                                 |
| Q9UKS6   | PACSIN3  | -0.197 | protein kinase C and casein kinase substrate in neurons 3                                              |
| Q15102   | PAFAH1B3 | -0.209 | platelet activating factor acetylhydrolase 1b catalytic subunit 3                                      |
| P00439   | PAH      | -0.501 | phenylalanine hydroxylase                                                                              |
| P22234-2 | PAICS    | -0.233 | phosphoribosylaminoimidazole carboxylase and phosphoribosylaminoimidazolesuccinocarboxamide synthetase |
| Q9NWT1   | PAK1IP1  | 0.154  | PAK1 interacting protein 1                                                                             |
| Q9NP74   | PALMD    | -0.236 | palmdelphin                                                                                            |
| O43252   | PAPSS1   | -0.179 | 3'-phosphoadenosine 5'-phosphosulfate synthase 1                                                       |
| Q86W56   | PARG     | -0.135 | poly(ADP-ribose) glycohydrolase                                                                        |
| Q9NVD7   | PARVA    | -0.256 | parvin alpha                                                                                           |
| P61457   | PCBD1    | -0.205 | pterin-4 alpha-carbinolamine dehydratase 1                                                             |
| Q9H4Z3   | PCIF1    | -0.208 | PDX1 C-terminal inhibiting factor 1                                                                    |
| Q15154-1 | PCM1     | -0.159 | pericentriolar material 1                                                                              |
| Q8WW12   | PCNP     | -0.181 | PEST proteolytic signal containing nuclear protein                                                     |
| Q9UKL6   | PCTP     | -0.231 | phosphatidylcholine transfer protein                                                                   |
| Q99447   | PCYT2    | -0.377 | phosphate cytidyltransferase 2, ethanolamine                                                           |
| Q53EL6   | PDCD4    | -0.273 | programmed cell death 4                                                                                |
| O14737   | PDCD5    | -0.28  | programmed cell death 5                                                                                |
| Q96HC4   | PDLIM5   | 0.169  | PDZ and LIM domain 5                                                                                   |
| Q9NR12   | PDLIM7   | 0.448  | PDZ and LIM domain 7                                                                                   |

|          |         |        |                                                                          |
|----------|---------|--------|--------------------------------------------------------------------------|
| Q8NCN5   | P DPR   | 0.269  | pyruvate dehydrogenase phosphatase regulatory subunit                    |
| Q6P996-1 | PDXDC1  | -0.296 | pyridoxal dependent decarboxylase domain containing 1                    |
| Q5T2W1   | PDZK1   | -0.319 | PDZ domain containing 1                                                  |
| P30086   | PEBP1   | -0.338 | phosphatidylethanolamine binding protein 1                               |
| Q9GZU2   | PEG3    | -0.154 | paternally expressed 3                                                   |
| Q9BRX2   | PELO    | 0.203  | pelota mRNA surveillance and ribosome rescue factor                      |
| P12955   | PEPD    | -0.305 | peptidase D                                                              |
| O15067   | PFAS    | -0.211 | phosphoribosylformylglycinamide synthase                                 |
| O15212   | PFDN6   | -0.147 | prefoldin subunit 6                                                      |
| P17858-1 | PFKL    | -0.219 | phosphofructokinase, liver type                                          |
| P07737   | PFN1    | -0.194 | profilin 1                                                               |
| P18669   | PGAM1   | -0.185 | phosphoglycerate mutase 1                                                |
| Q96HS1-1 | PGAM5   | 0.166  | PGAM family member 5, mitochondrial serine/threonine protein phosphatase |
| P00558   | PGK1    | -0.148 | phosphoglycerate kinase 1                                                |
| O95336   | PGLS    | -0.252 | 6-phosphogluconolactonase                                                |
| P36871-1 | PGM1    | -0.387 | phosphoglucomutase 1                                                     |
| Q96G03   | PGM2    | -0.176 | phosphoglucomutase 2                                                     |
| A6NDG6   | PGP     | -0.33  | phosphoglycolate phosphatase                                             |
| Q9NXJ5   | PGPEP1  | -0.384 | pyroglutamyl-peptidase I                                                 |
| Q8IZ21-2 | PHACTR4 | -0.201 | phosphatase and actin regulator 4                                        |
| Q9H814   | PHAX    | -0.195 | phosphorylated adaptor for RNA export                                    |
| Q99623   | PHB2    | 0.166  | prohibitin 2                                                             |
| P46019   | PHKA2   | -0.122 | phosphorylase kinase regulatory subunit alpha 2                          |
| Q8WV24   | PHLDA1  | 0.194  | pleckstrin homology like domain family A member 1                        |
| Q9BTU6   | PI4K2A  | 0.199  | phosphatidylinositol 4-kinase type 2 alpha                               |
| Q9NWS0-1 | PIH1D1  | -0.176 | PIH1 domain containing 1                                                 |
| Q9Y237-2 | PIN4    | -0.194 | peptidylprolyl cis/trans isomerase, NIMA-interacting 4                   |
| Q9P0Z9   | PIPOX   | -0.141 | pipecolic acid and sarcosine oxidase                                     |
| O00625   | PIR     | -0.254 | pirin                                                                    |
| Q5JRX3-2 | PITRM1  | 0.316  | pitrilysin metallopeptidase 1                                            |
| P30613   | PKLR    | -0.336 | pyruvate kinase L/R                                                      |
| Q16512-2 | PKN1    | -0.23  | protein kinase N1                                                        |
| Q01970   | PLCB3   | -0.225 | phospholipase C beta 3                                                   |
| Q99541   | PLIN2   | 0.314  | perilipin 2                                                              |
| P53350   | PLK1    | 0.19   | polo like kinase 1                                                       |
| Q02809-2 | PLOD1   | -0.169 | procollagen-lysine,2-oxoglutarate 5-dioxygenase 1                        |
| O94903   | PLPBP   | -0.228 | pyridoxal phosphate binding protein                                      |
| O43660   | PLRG1   | 0.11   | pleiotropic regulator 1                                                  |
| P13797   | PLS3    | -0.198 | plastin 3                                                                |
| O43157   | PLXNB1  | -0.147 | plexin B1                                                                |
| O15305   | PMM2    | -0.205 | phosphomannomutase 2                                                     |
| O75439   | PMPCB   | 0.168  | peptidase, mitochondrial processing beta subunit                         |
| Q9NRX1   | PNO1    | 0.325  | partner of NOB1 homolog                                                  |
| P41247   | PNPLA4  | 0.246  | patatin like phospholipase domain containing 4                           |
| Q9NV59   | PNPO    | -0.238 | pyridoxamine 5'-phosphate oxidase                                        |
| P09884   | POLA1   | -0.279 | DNA polymerase alpha 1, catalytic subunit                                |
| P28340   | POLD1   | -0.277 | DNA polymerase delta 1, catalytic subunit                                |

|          |          |        |                                                                      |
|----------|----------|--------|----------------------------------------------------------------------|
| P49005   | POLD2    | -0.281 | DNA polymerase delta 2, accessory subunit                            |
| Q07864   | POLE     | -0.225 | DNA polymerase epsilon, catalytic subunit                            |
| Q9NRF9   | POLE3    | -0.152 | DNA polymerase epsilon 3, accessory subunit                          |
| P54098   | POLG     | 0.173  | DNA polymerase gamma, catalytic subunit                              |
| Q06203   | PPAT     | -0.308 | phosphoribosyl pyrophosphate amidotransferase                        |
| Q9HAB8   | PPCS     | -0.184 | phosphopantothenoilcysteine synthetase                               |
| P62937   | PPIA     | -0.179 | peptidylprolyl isomerase A                                           |
| P45877   | PPIC     | -0.171 | peptidylprolyl isomerase C                                           |
| Q9H2H8-1 | PPIL3    | -0.112 | peptidylprolyl isomerase like 3                                      |
| Q9ULR3   | PPM1H    | -0.216 | protein phosphatase, Mg <sup>2+</sup> /Mn <sup>2+</sup> dependent 1H |
| Q96C90   | PPP1R14B | -0.344 | protein phosphatase 1 regulatory inhibitor subunit 14B               |
| Q6NYC8   | PPP1R18  | 0.405  | protein phosphatase 1 regulatory subunit 18                          |
| Q6ZMI0-1 | PPP1R21  | -0.18  | protein phosphatase 1 regulatory subunit 21                          |
| Q15435   | PPP1R7   | -0.255 | protein phosphatase 1 regulatory subunit 7                           |
| P60510   | PPP4C    | -0.153 | protein phosphatase 4 catalytic subunit                              |
| Q8TF05   | PPP4R1   | -0.229 | protein phosphatase 4 regulatory subunit 1                           |
| Q5H9R7-5 | PPP6R3   | -0.134 | protein phosphatase 6 regulatory subunit 3                           |
| P32119   | PRDX2    | -0.195 | peroxiredoxin 2                                                      |
| P30041   | PRDX6    | -0.284 | peroxiredoxin 6                                                      |
| P48147   | PREP     | -0.193 | prolyl endopeptidase                                                 |
| P49643   | PRIM2    | -0.161 | DNA primase subunit 2                                                |
| P17612   | PRKACA   | -0.163 | protein kinase cAMP-activated catalytic subunit alpha                |
| P10644   | PRKAR1A  | -0.292 | protein kinase cAMP-dependent type I regulatory subunit alpha        |
| Q99873   | PRMT1    | -0.131 | protein arginine methyltransferase 1                                 |
| O14744   | PRMT5    | -0.116 | protein arginine methyltransferase 5                                 |
| O43395   | PRPF3    | 0.128  | pre-mRNA processing factor 3                                         |
| Q8NAV1-1 | PRPF38A  | 0.142  | pre-mRNA processing factor 38A                                       |
| O43172   | PRPF4    | 0.093  | pre-mRNA processing factor 4                                         |
| Q14558-2 | PRPSAP1  | -0.128 | phosphoribosyl pyrophosphate synthetase associated protein 1         |
| Q8TBF2-8 | PRXL2B   | -0.219 | peroxiredoxin like 2B                                                |
| P07602-3 | PSAP     | -0.317 | prosaposin                                                           |
| Q9Y617   | PSAT1    | -0.263 | phosphoserine aminotransferase 1                                     |
| Q16401   | PSMD5    | -0.203 | proteasome 26S subunit, non-ATPase 5                                 |
| Q06323   | PSME1    | -0.422 | proteasome activator subunit 1                                       |
| Q9UL46   | PSME2    | -0.305 | proteasome activator subunit 2                                       |
| Q92530   | PSMF1    | -0.2   | proteasome inhibitor subunit 1                                       |
| O95456   | PSMG1    | -0.193 | proteasome assembly chaperone 1                                      |
| P78330   | PSPH     | -0.372 | phosphoserine phosphatase                                            |
| O95758-4 | PTBP3    | 0.181  | polypyrimidine tract binding protein 3                               |
| Q14914   | PTGR1    | 0.22   | prostaglandin reductase 1                                            |
| Q13308-6 | PTK7     | -0.236 | protein tyrosine kinase 7 (inactive)                                 |
| Q86YD1-1 | PTOV1    | -0.184 | PTOV1 extended AT-hook containing adaptor protein                    |
| Q15257   | PTPA     | -0.209 | protein phosphatase 2 phosphatase activator                          |
| P10586-1 | PTPRF    | -0.264 | protein tyrosine phosphatase receptor type F                         |
| Q86Y79   | PTRH1    | 0.277  | peptidyl-tRNA hydrolase 1 homolog                                    |
| Q9Y3E5   | PTRH2    | 0.258  | peptidyl-tRNA hydrolase 2                                            |
| Q15397   | PUM3     | 0.392  | pumilio RNA binding family member 3                                  |

|          |          |        |                                                        |
|----------|----------|--------|--------------------------------------------------------|
| Q3MIT2   | PUS10    | -0.311 | pseudouridine synthase 10                              |
| Q96C36   | PYCR2    | 0.158  | pyrroline-5-carboxylate reductase 2                    |
| P06737   | PYGL     | -0.273 | glycogen phosphorylase L                               |
| Q9BRP8   | PYM1     | -0.178 | PYM homolog 1, exon junction complex associated factor |
| P09417   | QDPR     | -0.126 | quinoid dihydropteridine reductase                     |
| Q15274   | QPRT     | -0.279 | quinolate phosphoribosyltransferase                    |
| Q6ZRP7   | QSOX2    | -0.117 | quiescin sulfhydryl oxidase 2                          |
| Q9BXR0   | QTRT1    | -0.118 | queuine tRNA-ribosyltransferase catalytic subunit 1    |
| P61026   | RAB10    | 0.301  | RAB10, member RAS oncogene family                      |
| Q9NP72   | RAB18    | 0.202  | RAB18, member RAS oncogene family                      |
| Q9UL26   | RAB22A   | 0.211  | RAB22A, member RAS oncogene family                     |
| P51159-1 | RAB27A   | 0.167  | RAB27A, member RAS oncogene family                     |
| P61019   | RAB2A    | 0.147  | RAB2A, member RAS oncogene family                      |
| P20338   | RAB4A    | -0.202 | RAB4A, member RAS oncogene family                      |
| Q9BUV8-5 | RAB5IF   | 0.231  | RAB5 interacting factor                                |
| P51149   | RAB7A    | 0.31   | RAB7A, member RAS oncogene family                      |
| P51151   | RAB9A    | 0.143  | RAB9A, member RAS oncogene family                      |
| Q9UI14   | RABAC1   | -0.221 | Rab acceptor 1                                         |
| Q9Y3P9   | RABGAP1  | -0.255 | RAB GTPase activating protein 1                        |
| Q3YEC7-1 | RABL6    | -0.187 | RAB, member RAS oncogene family like 6                 |
| Q9H0H5   | RACGAP1  | 0.267  | Rac GTPase activating protein 1                        |
| P63244   | RACK1    | -0.135 | receptor for activated C kinase 1                      |
| P78406   | RAE1     | 0.199  | ribonucleic acid export 1                              |
| P11234-2 | RALB     | 0.208  | RAS like proto-oncogene B                              |
| Q9H6Z4   | RANBP3   | -0.202 | RAN binding protein 3                                  |
| P52306-5 | RAP1GDS1 | -0.304 | Rap1 GTPase-GDP dissociation stimulator 1              |
| O75884   | RBBP9    | -0.254 | RB binding protein 9, serine hydrolase                 |
| Q9H477   | RBKS     | -0.453 | ribokinase                                             |
| Q8IXT5   | RBM12B   | 0.157  | RNA binding motif protein 12B                          |
| Q96PK6-1 | RBM14    | 0.169  | RNA binding motif protein 14                           |
| Q96T37   | RBM15    | 0.162  | RNA binding motif protein 15                           |
| Q9Y4C8   | RBM19    | 0.155  | RNA binding motif protein 19                           |
| P52756   | RBM5     | 0.14   | RNA binding motif protein 5                            |
| P02753   | RBP4     | -0.5   | retinol binding protein 4                              |
| Q9P2K3-3 | RCOR3    | -0.204 | REST corepressor 3                                     |
| Q9HBH5   | RDH14    | 0.166  | retinol dehydrogenase 14                               |
| Q00765   | REEP5    | 0.187  | receptor accessory protein 5                           |
| P78509   | RELN     | -0.155 | reelin                                                 |
| Q86VR2   | RETREG3  | -0.211 | reticulophagy regulator family member 3                |
| P35250-1 | RFC2     | -0.171 | replication factor C subunit 2                         |
| Q15382   | RHEB     | 0.19   | Ras homolog, mTORC1 binding                            |
| P84095   | RHOG     | 0.137  | ras homolog family member G                            |
| P52758   | RIDA     | -0.24  | reactive intermediate imine deaminase A homolog        |
| Q99496   | RNF2     | 0.126  | ring finger protein 2                                  |
| Q63HN8-4 | RNF213   | -0.157 | ring finger protein 213                                |
| Q9H4A4   | RNPEP    | -0.202 | arginyl aminopeptidase                                 |
| Q9H6T3   | RPAP3    | -0.133 | RNA polymerase II associated protein 3                 |

|                 |          |        |                                                                                 |
|-----------------|----------|--------|---------------------------------------------------------------------------------|
| <b>Q07020</b>   | RPL18    | 0.672  | ribosomal protein L18                                                           |
| <b>P61254</b>   | RPL26    | 0.268  | ribosomal protein L26                                                           |
| <b>P46776</b>   | RPL27A   | 0.28   | ribosomal protein L27a                                                          |
| <b>Q96P16-1</b> | RPRD1A   | -0.181 | regulation of nuclear pre-mRNA domain containing 1A                             |
| <b>P63220</b>   | RPS21    | -0.154 | ribosomal protein S21                                                           |
| <b>P62979</b>   | RPS27A   | 0.254  | ribosomal protein S27a                                                          |
| <b>P51812</b>   | RPS6KA3  | -0.3   | ribosomal protein S6 kinase A3                                                  |
| <b>P55042</b>   | RRAD     | 1.406  | RRAD, Ras related glycolysis inhibitor and calcium channel regulator            |
| <b>Q7L523</b>   | RRAGA    | 0.3    | Ras related GTP binding A                                                       |
| <b>Q9HB90</b>   | RRAGC    | 0.163  | Ras related GTP binding C                                                       |
| <b>P62070-4</b> | RRAS2    | 0.343  | RAS related 2                                                                   |
| <b>P23921</b>   | RRM1     | -0.104 | ribonucleotide reductase catalytic subunit M1                                   |
| <b>P56182</b>   | RRP1     | 0.16   | ribosomal RNA processing 1                                                      |
| <b>Q5JTH9</b>   | RRP12    | 0.265  | ribosomal RNA processing 12 homolog                                             |
| <b>O43159</b>   | RRP8     | 0.167  | ribosomal RNA processing 8                                                      |
| <b>Q6NW29</b>   | RWDD4    | -0.289 | RWD domain containing 4                                                         |
| <b>P28702-3</b> | RXRB     | -0.153 | retinoid X receptor beta                                                        |
| <b>P23297</b>   | S100A1   | -0.494 | S100 calcium binding protein A1                                                 |
| <b>P31949</b>   | S100A11  | 0.64   | S100 calcium binding protein A11                                                |
| <b>Q96FQ6</b>   | S100A16  | 0.236  | S100 calcium binding protein A16                                                |
| <b>P06703</b>   | S100A6   | 0.294  | S100 calcium binding protein A6                                                 |
| <b>P25815</b>   | S100P    | 0.238  | S100 calcium binding protein P                                                  |
| <b>P35542</b>   | SAA4     | -0.307 | serum amyloid A4, constitutive                                                  |
| <b>Q9Y3Z3</b>   | SAMHD1   | -0.158 | SAM and HD domain containing deoxynucleoside triphosphate triphosphohydrolase 1 |
| <b>O00422</b>   | SAP18    | 0.123  | Sin3A associated protein 18                                                     |
| <b>Q9Y6B6</b>   | SAR1B    | -0.195 | secretion associated Ras related GTPase 1B                                      |
| <b>Q8WTV0-2</b> | SCARB1   | -0.167 | scavenger receptor class B member 1                                             |
| <b>O00767</b>   | SCD      | -0.287 | stearoyl-CoA desaturase                                                         |
| <b>P18827</b>   | SDC1     | -0.343 | syndecan 1                                                                      |
| <b>P34741</b>   | SDC2     | -0.751 | syndecan 2                                                                      |
| <b>O00560</b>   | SDCBP    | 0.304  | syndecan binding protein                                                        |
| <b>Q15436</b>   | SEC23A   | -0.149 | Sec23 homolog A, coat complex II component                                      |
| <b>Q9Y6Y8</b>   | SEC23IP  | -0.142 | SEC23 interacting protein                                                       |
| <b>O95486</b>   | SEC24A   | -0.314 | SEC24 homolog A, COPII coat complex component                                   |
| <b>O94855-2</b> | SEC24D   | -0.183 | SEC24 homolog D, COPII coat complex component                                   |
| <b>O94979-8</b> | SEC31A   | -0.219 | SEC31 homolog A, COPII coat complex component                                   |
| <b>Q13228-4</b> | SELENBP1 | -0.296 | selenium binding protein 1                                                      |
| <b>O60613</b>   | SELENOF  | -0.361 | selenoprotein F                                                                 |
| <b>P49903</b>   | SEPHS1   | -0.158 | selenophosphate synthetase 1                                                    |
| <b>Q99611</b>   | SEPHS2   | -0.24  | selenophosphate synthetase 2                                                    |
| <b>Q9P0V9-2</b> | SEPTIN10 | 0.204  | septin 10                                                                       |
| <b>Q9UHD8-1</b> | SEPTIN9  | -0.134 | septin 9                                                                        |
| <b>Q8NC51-1</b> | SERBP1   | -0.113 | SERPINE1 mRNA binding protein 1                                                 |
| <b>P01009-1</b> | SERPINA1 | -0.229 | serpin family A member 1                                                        |
| <b>P05154</b>   | SERPINA5 | -0.265 | serpin family A member 5                                                        |
| <b>P05543</b>   | SERPINA7 | -0.328 | serpin family A member 7                                                        |
| <b>P35237</b>   | SERPINB6 | -0.199 | serpin family B member 6                                                        |

|            |          |        |                                                            |
|------------|----------|--------|------------------------------------------------------------|
| P05546     | SERPIND1 | -0.386 | serpin family D member 1                                   |
| P05121     | SERPINE1 | 0.565  | serpin family E member 1                                   |
| P08697-1   | SERPINF2 | -0.529 | serpin family F member 2                                   |
| P50454     | SERPINH1 | 0.454  | serpin family H member 1                                   |
| P58004     | SESN2    | 0.593  | sestrin 2                                                  |
| Q86TU7     | SETD3    | -0.239 | SET domain containing 3, actin histidine methyltransferase |
| Q15428     | SF3A2    | 0.196  | splicing factor 3a subunit 2                               |
| P31947     | SFN      | 0.368  | stratifin                                                  |
| P51688     | SGSH     | -0.261 | N-sulfoglucosamine sulfohydrolase                          |
| Q9H299     | SH3BGL3  | 0.157  | SH3 domain binding glutamate rich protein like 3           |
| Q9P0V3     | SH3BP4   | 0.429  | SH3 domain binding protein 4                               |
| Q8NEM2     | SHCBP1   | 0.341  | SHC binding and spindle associated 1                       |
| Q9NUL5     | SHFL     | -0.132 | shiftless antiviral inhibitor of ribosomal frameshifting   |
| P34896     | SHMT1    | -0.364 | serine hydroxymethyltransferase 1                          |
| P34897-1   | SHMT2    | 0.152  | serine hydroxymethyltransferase 2                          |
| A0A0B4J2A0 | SHPK     | -0.224 | sedoheptulokinase                                          |
| Q2M3G4-1   | SHROOM1  | -0.276 | shroom family member 1                                     |
| Q9NXA8-1   | SIRT5    | -0.135 | sirtuin 5                                                  |
| P53985     | SLC16A1  | 0.144  | solute carrier family 16 member 1                          |
| O15427     | SLC16A3  | -0.196 | solute carrier family 16 member 3                          |
| O15403     | SLC16A6  | 0.62   | solute carrier family 16 member 6                          |
| Q15758     | SLC1A5   | 0.231  | solute carrier family 1 member 5                           |
| Q8WUM9     | SLC20A1  | 0.266  | solute carrier family 20 member 1                          |
| Q6NUK1     | SLC25A24 | 0.155  | solute carrier family 25 member 24                         |
| P12236     | SLC25A6  | 0.379  | solute carrier family 25 member 6                          |
| O14975     | SLC27A2  | -0.237 | solute carrier family 27 member 2                          |
| Q9Y6M5     | SLC30A1  | 0.565  | solute carrier family 30 member 1                          |
| Q9HBR0     | SLC38A10 | -0.208 | solute carrier family 38 member 10                         |
| Q96QD8     | SLC38A2  | 0.477  | solute carrier family 38 member 2                          |
| Q99624     | SLC38A3  | -0.26  | solute carrier family 38 member 3                          |
| Q9ULF5     | SLC39A10 | 0.807  | solute carrier family 39 member 10                         |
| Q15043     | SLC39A14 | -0.291 | solute carrier family 39 member 14                         |
| Q6P5W5-2   | SLC39A4  | 0.174  | solute carrier family 39 member 4                          |
| P08195-4   | SLC3A2   | 0.2    | solute carrier family 3 member 2                           |
| Q9Y6M7-7   | SLC4A7   | 0.226  | solute carrier family 4 member 7                           |
| P30825     | SLC7A1   | 0.296  | solute carrier family 7 member 1                           |
| Q9UPY5     | SLC7A11  | 0.868  | solute carrier family 7 member 11                          |
| O14745     | SLC9A3R1 | -0.348 | SLC9A3 regulator 1                                         |
| Q15599     | SLC9A3R2 | -0.233 | SLC9A3 regulator 2                                         |
| Q9NWH9-1   | SLTM     | 0.153  | SAFB like transcription modulator                          |
| Q8IY18     | SMC5     | 0.144  | structural maintenance of chromosomes 5                    |
| Q9H0W8     | SMG9     | 0.137  | SMG9 nonsense mediated mRNA decay factor                   |
| P53814-6   | SMTN     | 0.409  | smoothelin                                                 |
| Q2TAY7     | SMU1     | 0.128  | SMU1 DNA replication regulator and spliceosomal factor     |
| Q6GMV2     | SMYD5    | -0.269 | SMYD family member 5                                       |
| Q8TAD8     | SNIP1    | 0.201  | Smad nuclear interacting protein 1                         |
| Q13596     | SNX1     | -0.131 | sorting nexin 1                                            |

|          |                 |        |                                                                     |
|----------|-----------------|--------|---------------------------------------------------------------------|
| Q9NRS6   | SNX15           | -0.144 | sorting nexin 15                                                    |
| O60749   | SNX2            | -0.131 | sorting nexin 2                                                     |
| Q9Y5X3   | SNX5            | -0.195 | sorting nexin 5                                                     |
| Q00796   | SORD            | -0.37  | sorbitol dehydrogenase                                              |
| Q92673   | SORL1           | -0.693 | sortilin related receptor 1                                         |
| Q99523   | SORT1           | -0.371 | sortilin 1                                                          |
| O75391   | SPAG7           | -0.377 | sperm associated antigen 7                                          |
| O60271   | SPAG9           | 0.119  | sperm associated antigen 9                                          |
| Q69YQ0-1 | SPECC1L         | 0.128  | sperm antigen with calponin homology and coiled-coil domains 1 like |
| Q9H2V7   | SPNS1           | 0.155  | sphingolipid transporter 1 (putative)                               |
| P10451   | SPP1            | 0.409  | secreted phosphoprotein 1                                           |
| P35270   | SPR             | -0.246 | sepiapterin reductase                                               |
| Q01082-3 | SPTBN1          | 0.667  | spectrin beta, non-erythrocytic 1                                   |
| O15270   | SPTLC2          | 0.17   | serine palmitoyltransferase long chain base subunit 2               |
| Q68D10   | SPTY2D1         | 0.457  | SPT2 chromatin protein domain containing 1                          |
| Q14534   | SQLE            | -0.16  | squalene epoxidase                                                  |
| Q9Y6N5   | SQOR            | 0.387  | sulfide quinone oxidoreductase                                      |
| Q13501-1 | SQSTM1          | 0.29   | sequestosome 1                                                      |
| P19623   | SRM             | -0.154 | spermidine synthase                                                 |
| P49458   | SRP9            | -0.18  | signal recognition particle 9                                       |
| Q01130   | SRSF2           | -0.411 | serine and arginine rich splicing factor 2                          |
| Q9BYN0   | SRXN1           | 0.908  | sulfiredoxin 1                                                      |
| P15907   | ST6GAL1         | -0.263 | ST6 beta-galactoside alpha-2,6-sialyltransferase 1                  |
| Q9Y365   | STARD10         | -0.209 | StAR related lipid transfer domain containing 10                    |
| Q658P3-2 | STEAP3          | -0.538 | STEAP3 metalloredutase                                              |
| O94804   | STK10           | 0.351  | serine/threonine kinase 10                                          |
| Q13043-1 | STK4            | 0.238  | serine/threonine kinase 4                                           |
| P16949-1 | STMN1           | -0.352 | stathmin 1                                                          |
| P27105   | STOM            | 0.178  | stomatin                                                            |
| Q13277   | STX3            | 0.379  | syntaxin 3                                                          |
| O15400   | STX7            | 0.178  | syntaxin 7                                                          |
| P50225   | SULT1A1         | -0.248 | sulfotransferase family 1A member 1                                 |
| P0DMM9   | SULT1A3/SULT1A4 | -0.285 | sulfotransferase family 1A member 3                                 |
| Q06520   | SULT2A1         | -0.447 | sulfotransferase family 2A member 1                                 |
| O94901-9 | SUN1            | 0.239  | Sad1 and UNC84 domain containing 1                                  |
| O95425   | SVIL            | 0.327  | supervillin                                                         |
| Q9UH65   | SWAP70          | 0.145  | switching B cell complex subunit SWAP70                             |
| P37802-2 | TAGLN2          | 0.22   | transgelin 2                                                        |
| P37837   | TALDO1          | 0.172  | transaldolase 1                                                     |
| Q86VP1   | TAX1BP1         | 0.315  | Tax1 binding protein 1                                              |
| O75347   | TBCA            | -0.226 | tubulin folding cofactor A                                          |
| Q9Y4C2-1 | TCAF1           | -0.268 | TRPM8 channel associated factor 1                                   |
| O75764   | TCEA3           | -0.303 | transcription elongation factor A3                                  |
| Q9UGI8   | TES             | 0.244  | testin LIM domain protein                                           |
| Q96BS2   | TESC            | -0.283 | tescalcin                                                           |
| P02787   | TF              | -0.297 | transferrin                                                         |
| Q00059   | TFAM            | 0.489  | transcription factor A, mitochondrial                               |

|          |               |        |                                                           |
|----------|---------------|--------|-----------------------------------------------------------|
| Q9H5Q4   | TFB2M         | 0.368  | transcription factor B2, mitochondrial                    |
| P01137   | TGFB1         | 0.475  | transforming growth factor beta 1                         |
| Q03167   | TGFBR3        | -0.129 | transforming growth factor beta receptor 3                |
| Q96EK4   | THAP11        | -0.217 | THAP domain containing 11                                 |
| P07996   | THBS1         | 0.311  | thrombospondin 1                                          |
| P52888   | THOP1         | -0.206 | thimet oligopeptidase 1                                   |
| Q9P016   | THYN1         | -0.112 | thymocyte nuclear protein 1                               |
| Q9Y5L4   | TIMM13        | -0.222 | translocase of inner mitochondrial membrane 13            |
| Q9UDY2   | TJP2          | -0.172 | tight junction protein 2                                  |
| Q3LXA3   | TKFC          | -0.402 | triokinase and FMN cyclase                                |
| Q9UM00   | TMCO1         | 0.195  | transmembrane and coiled-coil domains 1                   |
| Q9H061   | TMEM126A      | 0.305  | transmembrane protein 126A                                |
| P57088   | TMEM33        | 0.239  | transmembrane protein 33                                  |
| Q9BUB7   | TMEM70        | 0.36   | transmembrane protein 70                                  |
| P42167   | TMPO          | 0.222  | thymopoietin                                              |
| P63313   | TMSB10/TMSB4X | 0.374  | thymosin beta 4 X-linked                                  |
| O00220   | TNFRSF10A     | 0.233  | TNF receptor superfamily member 10a                       |
| O14787-2 | TNPO2         | -0.223 | transportin 2                                             |
| Q68CZ2-1 | TNS3          | -0.172 | tensin 3                                                  |
| Q8IZW8   | TNS4          | 0.636  | tensin 4                                                  |
| Q15388   | TOMM20        | -0.2   | translocase of outer mitochondrial membrane 20            |
| Q15785   | TOMM34        | 0.342  | translocase of outer mitochondrial membrane 34            |
| Q96HA7   | TONSL         | -0.137 | tonsoku like, DNA repair protein                          |
| P11387   | TOP1          | 0.488  | DNA topoisomerase I                                       |
| Q5JTV8   | TOR1AIP1      | 0.254  | torsin 1A interacting protein 1                           |
| P60174   | TPI1          | -0.194 | triosephosphate isomerase 1                               |
| Q9ULW0   | TPX2          | 0.518  | TPX2 microtubule nucleation factor                        |
| Q9Y296   | TRAPPC4       | 0.114  | trafficking protein particle complex 4                    |
| Q9BQ61   | TRIR          | -0.279 | telomerase RNA component interacting RNase                |
| Q7L0Y3   | TRMT10C       | 0.301  | tRNA methyltransferase 10C, mitochondrial RNase P subunit |
| O95900   | TRUB2         | 0.173  | TruB pseudouridine synthase family member 2               |
| Q9H0U9   | TSPYL1        | 0.203  | TSPY like 1                                               |
| Q9H2G4   | TSPYL2        | 0.495  | TSPY like 2                                               |
| Q13630   | TSTA3         | -0.139 | tissue specific transplantation antigen P35B              |
| Q5R3I4   | TTC38         | -0.409 | tetratricopeptide repeat domain 38                        |
| Q14166   | TTL12         | -0.167 | tubulin tyrosine ligase like 12                           |
| Q13509   | TUBB3         | 0.209  | tubulin beta 3 class III                                  |
| Q9BUF5   | TUBB6         | 0.177  | tubulin beta 6 class V                                    |
| Q96CW5   | TUBGCP3       | -0.102 | tubulin gamma complex associated protein 3                |
| P49411   | TUFM          | 0.155  | Tu translation elongation factor, mitochondrial           |
| Q6IBS0   | TWF2          | -0.166 | twinfilin actin binding protein 2                         |
| P40222   | TXLNA         | -0.111 | taxilin alpha                                             |
| Q9BRA2   | TXNDC17       | -0.222 | thioredoxin domain containing 17                          |
| P83876   | TXNL4A        | -0.296 | thioredoxin like 4A                                       |
| Q16881   | TXNRD1        | 0.246  | thioredoxin reductase 1                                   |
| P19971-2 | TYMP          | -0.242 | thymidine phosphorylase                                   |
| P26368   | U2AF2         | -0.136 | U2 small nuclear RNA auxiliary factor 2                   |

|          |          |        |                                                                                   |
|----------|----------|--------|-----------------------------------------------------------------------------------|
| Q3KQV9   | UAP1L1   | -0.232 | UDP-N-acetylglucosamine pyrophosphorylase 1 like 1                                |
| P22314   | UBA1     | -0.156 | ubiquitin like modifier activating enzyme 1                                       |
| Q8TBC4-1 | UBA3     | -0.13  | ubiquitin like modifier activating enzyme 3                                       |
| Q9GZ29-1 | UBA5     | -0.186 | ubiquitin like modifier activating enzyme 5                                       |
| P63279   | UBE2I    | -0.155 | ubiquitin conjugating enzyme E2 I                                                 |
| P68036   | UBE2L3   | -0.161 | ubiquitin conjugating enzyme E2 L3                                                |
| P61081   | UBE2M    | -0.144 | ubiquitin conjugating enzyme E2 M                                                 |
| P61088   | UBE2N    | -0.167 | ubiquitin conjugating enzyme E2 N                                                 |
| Q9NPD8   | UBE2T    | -0.17  | ubiquitin conjugating enzyme E2 T                                                 |
| Q13404-1 | UBE2V1   | -0.234 | ubiquitin conjugating enzyme E2 V1                                                |
| O95155-4 | UBE4B    | -0.137 | ubiquitination factor E4B                                                         |
| Q8WVY7   | UBLCP1   | -0.153 | ubiquitin like domain containing CTD phosphatase 1                                |
| Q8N806   | UBR7     | -0.183 | ubiquitin protein ligase E3 component n-recognin 7 (putative)                     |
| Q92575   | UBXN4    | 0.109  | UBX domain protein 4                                                              |
| Q6UWM9   | UGT2A3   | -0.122 | UDP glucuronosyltransferase family 2 member A3                                    |
| Q6BDS2   | UHRF1BP1 | -0.142 | UHRF1 binding protein 1                                                           |
| Q9BRT2   | UQCC2    | -0.174 | ubiquinol-cytochrome c reductase complex assembly factor 2                        |
| Q8TCY9   | URGCP    | 0.205  | upregulator of cell proliferation                                                 |
| P06132   | UROD     | -0.269 | uroporphyrinogen decarboxylase                                                    |
| Q92995   | USP13    | -0.223 | ubiquitin specific peptidase 13                                                   |
| Q8TED0   | UTP15    | 0.192  | UTP15 small subunit processome component                                          |
| Q9Y5J1   | UTP18    | 0.146  | UTP18 small subunit processome component                                          |
| Q9NQZ2   | UTP3     | 0.239  | UTP3 small subunit processome component                                           |
| Q969X6   | UTP4     | 0.259  | UTP4 small subunit processome component                                           |
| Q9P0L0-2 | VAPA     | 0.27   | VAMP associated protein A                                                         |
| P26640   | VARS     | -0.134 | valyl-tRNA synthetase 1                                                           |
| Q6EMK4   | VASN     | -0.294 | vasorin                                                                           |
| P50552   | VASP     | 0.159  | vasodilator stimulated phosphoprotein                                             |
| Q99536   | VAT1     | -0.153 | vesicle amine transport 1                                                         |
| P52735   | VAV2     | -0.23  | vav guanine nucleotide exchange factor 2                                          |
| P61758   | VBP1     | -0.15  | VHL binding protein 1                                                             |
| P18206   | VCL      | -0.176 | vinculin                                                                          |
| P21796   | VDAC1    | 0.133  | voltage dependent anion channel 1                                                 |
| P45880-1 | VDAC2    | 0.273  | voltage dependent anion channel 2                                                 |
| P09327   | VIL1     | -0.111 | villin 1                                                                          |
| Q9H9C1-1 | VIPAS39  | -0.277 | VPS33B interacting protein, apical-basolateral polarity regulator, spe-39 homolog |
| Q9BRG1   | VPS25    | -0.168 | vacuolar protein sorting 25 homolog                                               |
| Q9UBQ0   | VPS29    | -0.15  | VPS29 retromer complex component                                                  |
| Q96QK1   | VPS35    | -0.191 | VPS35 retromer complex component                                                  |
| Q96JG6   | VPS50    | -0.203 | VPS50 subunit of EARP/GARPII complex                                              |
| P62760   | VSNL1    | -0.472 | visinin like 1                                                                    |
| Q9UGM6   | WARS2    | 0.255  | tryptophanyl tRNA synthetase 2, mitochondrial                                     |
| Q2M389   | WASHC4   | -0.188 | WASH complex subunit 4                                                            |
| Q12768   | WASHC5   | -0.209 | WASH complex subunit 5                                                            |
| Q9GZL7   | WDR12    | -0.16  | WD repeat domain 12                                                               |
| Q9UNX4   | WDR3     | 0.172  | WD repeat domain 3                                                                |
| Q8NI36   | WDR36    | 0.152  | WD repeat domain 36                                                               |

|          |         |        |                                                                                |
|----------|---------|--------|--------------------------------------------------------------------------------|
| Q6RFH5   | WDR74   | 0.17   | WD repeat domain 74                                                            |
| Q562E7   | WDR81   | -0.12  | WD repeat domain 81                                                            |
| A4D1P6   | WDR91   | -0.203 | WD repeat domain 91                                                            |
| Q9Y3S1   | WNK2    | -0.646 | WNK lysine deficient protein kinase 2                                          |
| Q9HCS7   | XAB2    | 0.145  | XPA binding protein 2                                                          |
| O14980   | XPO1    | -0.114 | exportin 1                                                                     |
| Q9C0E2   | XPO4    | -0.252 | exportin 4                                                                     |
| O75191   | XYLB    | -0.235 | xylulokinase                                                                   |
| P54577   | YARS1   | -0.137 | tyrosyl-tRNA synthetase 1                                                      |
| P67809   | YBX1    | -0.239 | Y-box binding protein 1                                                        |
| Q5BJH7   | YIF1B   | 0.198  | Yip1 interacting factor homolog B, membrane trafficking protein                |
| O15498   | YKT6    | 0.243  | YKT6 v-SNARE homolog                                                           |
| Q86U90   | YRDC    | 0.242  | yrdC N6-threonylcarbamoyltransferase domain containing                         |
| Q96MU7-1 | YTHDC1  | 0.142  | YTH domain containing 1                                                        |
| P62258   | YWHAE   | -0.18  | tyrosine 3-monooxygenase/tryptophan 5-monooxygenase activation protein epsilon |
| O95625   | ZBTB11  | 0.191  | zinc finger and BTB domain containing 11                                       |
| O75152   | ZC3H11A | 0.22   | zinc finger CCCH-type containing 11A                                           |
| Q8WU90   | ZC3H15  | -0.154 | zinc finger CCCH-type containing 15                                            |
| Q722W4   | ZC3HAV1 | 0.147  | zinc finger CCCH-type containing, antiviral 1                                  |
| Q9C0B9   | ZCCHC2  | -0.231 | zinc finger CCHC-type containing 2                                             |
| Q8N5A5   | ZGPAT   | 0.186  | zinc finger CCCH-type and G-patch domain containing                            |
| Q14202   | ZMYM3   | -0.318 | zinc finger MYM-type containing 3                                              |
| Q8NC26   | ZNF114  | 0.394  | zinc finger protein 114                                                        |
| O75362   | ZNF217  | -0.113 | zinc finger protein 217                                                        |
| Q9P2Y4   | ZNF219  | -0.193 | zinc finger protein 219                                                        |
| Q5BKZ1   | ZNF326  | 0.112  | zinc finger protein 326                                                        |
| Q969S3   | ZNF622  | 0.166  | zinc finger protein 622                                                        |
| Q9H900-1 | ZWILCH  | -0.141 | zwilch kinetochore protein                                                     |
| Q9C0D3   | ZYG11B  | -0.191 | zyg-11 family member B, cell cycle regulator                                   |
| O43149   | ZZEF1   | -0.307 | zinc finger ZZ-type and EF-hand domain containing 1                            |
| P00374   |         | -0.26  |                                                                                |
| P00761   |         | 0.251  |                                                                                |
| P62158   |         | -0.273 |                                                                                |
| P69905   |         | 1.153  |                                                                                |

## List of proteins deregulated in HepG2 cells after 24h exposure to CDDP 10 mM

| ID       | Symbol   | Expr Log Ratio | Entrez Gene Name                                                        |
|----------|----------|----------------|-------------------------------------------------------------------------|
| Q9NQ94   | A1CF     | -0.129         | APOBEC1 complementation factor                                          |
| Q13685   | AAMP     | -0.192         | angio associated migratory cell protein                                 |
| Q9NRN7   | AASDHPPT | 0.193          | aminoadipate-semialdehyde dehydrogenase-phosphopantetheinyl transferase |
| O95477   | ABCA1    | -0.274         | ATP binding cassette subfamily A member 1                               |
| Q8TB40   | ABHD4    | 0.421          | abhydrolase domain containing 4                                         |
| Q9BV23   | ABHD6    | 0.18           | abhydrolase domain containing 6                                         |
| Q9ULW3   | ABT1     | -0.141         | activator of basal transcription 1                                      |
| Q13085-4 | ACACA    | -0.274         | acetyl-CoA carboxylase alpha                                            |
| P45954   | ACADSB   | 0.144          | acyl-CoA dehydrogenase short/branched chain                             |
| Q15057   | ACAP2    | -0.229         | ArfGAP with coiled-coil, ankyrin repeat and PH domains 2                |
| P24752   | ACAT1    | 0.144          | acetyl-CoA acetyltransferase 1                                          |
| Q15067   | ACOX1    | 0.226          | acyl-CoA oxidase 1                                                      |
| P11117   | ACP2     | 0.171          | acid phosphatase 2, lysosomal                                           |
| O95573   | ACSL3    | 0.168          | acyl-CoA synthetase long chain family member 3                          |
| O60488-1 | ACSL4    | -0.247         | acyl-CoA synthetase long chain family member 4                          |
| P14621   | ACYP2    | -0.575         | acylphosphatase 2                                                       |
| O14672   | ADAM10   | -0.165         | ADAM metallopeptidase domain 10                                         |
| P35611-3 | ADD1     | -0.179         | adducin 1                                                               |
| Q9Y653   | ADGRG1   | 1.224          | adhesion G protein-coupled receptor G1                                  |
| Q86SQ4-3 | ADGRG6   | -0.2           | adhesion G protein-coupled receptor G6                                  |
| P55263   | ADK      | -0.241         | adenosine kinase                                                        |
| Q16186   | ADRM1    | 0.216          | adhesion regulating molecule 1                                          |
| P30566   | ADSL     | -0.106         | adenylosuccinate lyase                                                  |
| Q9UHB7-1 | AFF4     | 0.18           | AF4/FMR2 family member 4                                                |
| Q6ULP2   | AFTPH    | -0.354         | aftiphilin                                                              |
| Q96P47-4 | AGAP3    | -0.274         | ArfGAP with GTPase domain, ankyrin repeat and PH domain 3               |
| Q9BSE5   | AGMAT    | 0.112          | agmatinase                                                              |
| O00468   | AGRN     | -0.246         | agrin                                                                   |
| P01019   | AGT      | -0.539         | angiotensinogen                                                         |
| O95831-1 | AIFM1    | 0.15           | apoptosis inducing factor mitochondria associated 1                     |
| Q96IF1   | AJUBA    | -0.206         | ajuba LIM protein                                                       |
| P00568   | AK1      | 0.227          | adenylate kinase 1                                                      |
| Q9UIJ7-1 | AK3      | 0.248          | adenylate kinase 3                                                      |
| Q12802-2 | AKAP13   | -0.268         | A-kinase anchoring protein 13                                           |
| Q02040-1 | AKAP17A  | 0.167          | A-kinase anchoring protein 17A                                          |
| O43823   | AKAP8    | 0.218          | A-kinase anchoring protein 8                                            |
| Q9ULX6   | AKAP8L   | 0.204          | A-kinase anchoring protein 8 like                                       |
| O60218   | AKR1B10  | 0.127          | aldo-keto reductase family 1 member B10                                 |
| P30837   | ALDH1B1  | 0.161          | aldehyde dehydrogenase 1 family member B1                               |
| P05091   | ALDH2    | 0.163          | aldehyde dehydrogenase 2 family member                                  |
| P49419-2 | ALDH7A1  | 0.326          | aldehyde dehydrogenase 7 family member A1                               |

|          |                        |        |                                                                     |
|----------|------------------------|--------|---------------------------------------------------------------------|
| P49189   | ALDH9A1                | 0.138  | aldehyde dehydrogenase 9 family member A1                           |
| P09972   | ALDOC                  | -0.123 | aldolase, fructose-bisphosphate C                                   |
| Q8IWZ3-6 | ANKHD1/ANKHD1-EIF4EBP3 | -0.18  | ankyrin repeat and KH domain containing 1                           |
| Q92625   | ANKS1A                 | -0.201 | ankyrin repeat and sterile alpha motif domain containing 1A         |
| Q9NQW6   | ANLN                   | 0.541  | anillin actin binding protein                                       |
| Q9BZZ5-2 | API5                   | 0.118  | apoptosis inhibitor 5                                               |
| P02647   | APOA1                  | -0.233 | apolipoprotein A1                                                   |
| P04114   | APOB                   | -0.692 | apolipoprotein B                                                    |
| Q9NRW3   | APOBEC3C               | 0.778  | apolipoprotein B mRNA editing enzyme catalytic subunit 3C           |
| P02649   | APOE                   | -0.172 | apolipoprotein E                                                    |
| O14791-2 | APOL1                  | -0.442 | apolipoprotein L1                                                   |
| Q96P48-6 | ARAP1                  | -0.248 | ArfGAP with RhoGAP domain, ankyrin repeat and PH domain 1           |
| P84085   | ARF5                   | 0.172  | ADP ribosylation factor 5                                           |
| P78540   | ARG2                   | 0.37   | arginase 2                                                          |
| Q8IWW6-1 | ARHGAP12               | -0.17  | Rho GTPase activating protein 12                                    |
| Q8N392   | ARHGAP18               | -0.326 | Rho GTPase activating protein 18                                    |
| Q9NRY4   | ARHGAP35               | -0.224 | Rho GTPase activating protein 35                                    |
| Q92888-3 | ARHGEF1                | -0.151 | Rho guanine nucleotide exchange factor 1                            |
| Q8N1W1-6 | ARHGEF28               | -0.213 | Rho guanine nucleotide exchange factor 28                           |
| Q8NFD5-3 | ARID1B                 | -0.276 | AT-rich interaction domain 1B                                       |
| Q8IVW6   | ARID3B                 | 0.246  | AT-rich interaction domain 3B                                       |
| Q6NXE6-1 | ARMC6                  | -0.141 | armadillo repeat containing 6                                       |
| Q5T2E6   | ARMH3                  | -0.257 | armadillo like helical domain containing 3                          |
| P15848   | ARSB                   | -0.227 | arylsulfatase B                                                     |
| O00192   | ARVCF                  | 0.384  | ARVCF delta catenin family member                                   |
| Q8N9N2-2 | ASCC1                  | -0.277 | activating signal cointegrator 1 complex subunit 1                  |
| Q9H1I8-1 | ASCC2                  | -0.255 | activating signal cointegrator 1 complex subunit 2                  |
| Q8N3C0   | ASCC3                  | -0.366 | activating signal cointegrator 1 complex subunit 3                  |
| P07306   | ASGR1                  | -0.156 | asialoglycoprotein receptor 1                                       |
| P07307   | ASGR2                  | -0.146 | asialoglycoprotein receptor 2                                       |
| P08243   | ASNS                   | -0.189 | asparagine synthetase (glutamine-hydrolyzing)                       |
| Q9NWL6   | ASNSD1                 | -0.23  | asparagine synthetase domain containing 1                           |
| P00966   | ASS1                   | -0.188 | argininosuccinate synthase 1                                        |
| Q8NBU5   | ATAD1                  | 0.171  | ATPase family AAA domain containing 1                               |
| Q6PL18-1 | ATAD2                  | -0.202 | ATPase family AAA domain containing 2                               |
| Q5T9A4   | ATAD3B                 | -0.234 | ATPase family AAA domain containing 3B                              |
| P18847   | ATF3                   | 0.857  | activating transcription factor 3                                   |
| Q9NT62   | ATG3                   | -0.156 | autophagy related 3                                                 |
| O95352   | ATG7                   | -0.262 | autophagy related 7                                                 |
| P98196   | ATP11A                 | -0.267 | ATPase phospholipid transporting 11A                                |
| P05023   | ATP1A1                 | 0.107  | ATPase Na <sup>+</sup> /K <sup>+</sup> transporting subunit alpha 1 |
| P05026   | ATP1B1                 | 0.211  | ATPase Na <sup>+</sup> /K <sup>+</sup> transporting subunit beta 1  |
| P54709   | ATP1B3                 | 0.192  | ATPase Na <sup>+</sup> /K <sup>+</sup> transporting subunit beta 3  |
| Q9UII2   | ATP5IF1                | 0.346  | ATP synthase inhibitory factor subunit 1                            |
| O75947-1 | ATP5PD                 | 0.156  | ATP synthase peripheral stalk subunit d                             |
| P18859-2 | ATP5PF                 | 0.208  | ATP synthase peripheral stalk subunit F6                            |
| P48047   | ATP5PO                 | 0.263  | ATP synthase peripheral stalk subunit OSCP                          |

|                  |          |        |                                                                                  |
|------------------|----------|--------|----------------------------------------------------------------------------------|
| <b>O75787</b>    | ATP6AP2  | 0.316  | ATPase H <sup>+</sup> transporting accessory protein 2                           |
| <b>P61421</b>    | ATP6V0D1 | 0.218  | ATPase H <sup>+</sup> transporting V0 subunit d1                                 |
| <b>P21283</b>    | ATP6V1C1 | 0.137  | ATPase H <sup>+</sup> transporting V1 subunit C1                                 |
| <b>Q9Y5K8</b>    | ATP6V1D  | 0.118  | ATPase H <sup>+</sup> transporting V1 subunit D                                  |
| <b>Q5TC12</b>    | ATPAF1   | 0.224  | ATP synthase mitochondrial F1 complex assembly factor 1                          |
| <b>P0C7T5</b>    | ATXN1L   | -0.679 | ataxin 1 like                                                                    |
| <b>O14965</b>    | AURKA    | 0.3    | aurora kinase A                                                                  |
| <b>Q96GD4-5</b>  | AURKB    | 0.329  | aurora kinase B                                                                  |
| <b>Q9NQS1</b>    | AVEN     | -0.172 | apoptosis and caspase activation inhibitor                                       |
| <b>Q8NBF6-1</b>  | AVL9     | -0.289 | AVL9 cell migration associated                                                   |
| <b>Q9NY97</b>    | B3GNT2   | 0.223  | UDP-GlcNAc:betaGal beta-1,3-N-acetylglucosaminyltransferase 2                    |
| <b>Q9NXR7-1</b>  | BABAM2   | -0.286 | BRISC and BRCA1 A complex member 2                                               |
| <b>P51572-2</b>  | BCAP31   | 0.291  | B cell receptor associated protein 31                                            |
| <b>P56945-6</b>  | BCAR1    | 0.15   | BCAR1 scaffold protein, Cas family member                                        |
| <b>O75934</b>    | BCAS2    | 0.161  | BCAS2 pre-mRNA processing factor                                                 |
| <b>Q86UU0</b>    | BCL9L    | 0.333  | BCL9 like                                                                        |
| <b>Q9NYM9</b>    | BET1L    | -0.178 | Bet1 golgi vesicular membrane trafficking protein like                           |
| <b>Q9NR09</b>    | BIRC6    | -0.219 | baculoviral IAP repeat containing 6                                              |
| <b>Q14692</b>    | BMS1     | -0.191 | BMS1 ribosome biogenesis factor                                                  |
| <b>Q53S33</b>    | BOLA3    | 0.398  | bolA family member 3                                                             |
| <b>Q86WA6</b>    | BPHL     | 0.234  | biphenyl hydrolase like                                                          |
| <b>Q5VW32</b>    | BROX     | -0.14  | BRO1 domain and CAAX motif containing                                            |
| <b>Q7KYR7</b>    | BTN2A1   | 0.386  | butyrophilin subfamily 2 member A1                                               |
| <b>O43709</b>    | BUD23    | -0.218 | BUD23 rRNA methyltransferase and ribosome maturation factor                      |
| <b>P41223-2</b>  | BUD31    | 0.224  | BUD31 homolog                                                                    |
| <b>Q9Y6E2</b>    | BZW2     | -0.18  | basic leucine zipper and W2 domains 2                                            |
| <b>Q8N5I9</b>    | C12orf45 | 0.431  | chromosome 12 open reading frame 45                                              |
| <b>Q8NDD1</b>    | C1orf131 | -0.465 | chromosome 1 open reading frame 131                                              |
| <b>A6NCS6</b>    | C2orf72  | -0.223 | chromosome 2 open reading frame 72                                               |
| <b>P01024</b>    | C3       | -0.205 | complement C3                                                                    |
| <b>Q9BRJ6</b>    | C7orf50  | -0.393 | chromosome 7 open reading frame 50                                               |
| <b>P27708</b>    | CAD      | -0.154 | carbamoyl-phosphate synthetase 2, aspartate transcarbamylase, and dihydroorotase |
| <b>Q9BY67-3</b>  | CADM1    | -0.302 | cell adhesion molecule 1                                                         |
| <b>Q13557-10</b> | CAMK2D   | -0.221 | calcium/calmodulin dependent protein kinase II delta                             |
| <b>P40123</b>    | CAP2     | -0.239 | cyclase associated actin cytoskeleton regulatory protein 2                       |
| <b>P47755</b>    | CAPZA2   | -0.152 | capping actin protein of muscle Z-line subunit alpha 2                           |
| <b>P49589-3</b>  | CARS1    | -0.24  | cysteinyl-tRNA synthetase 1                                                      |
| <b>O15234</b>    | CASC3    | -0.238 | CASC3 exon junction complex subunit                                              |
| <b>O95810</b>    | CAVIN2   | 0.326  | caveolae associated protein 2                                                    |
| <b>P45973</b>    | CBX5     | 0.376  | chromobox 5                                                                      |
| <b>Q8IX12</b>    | CCAR1    | 0.195  | cell division cycle and apoptosis regulator 1                                    |
| <b>Q8IWD4</b>    | CCDC117  | 0.627  | coiled-coil domain containing 117                                                |
| <b>Q96CT7</b>    | CCDC124  | -0.187 | coiled-coil domain containing 124                                                |
| <b>Q6PK04</b>    | CCDC137  | -0.473 | coiled-coil domain containing 137                                                |
| <b>O60826</b>    | CCDC22   | -0.17  | coiled-coil domain containing 22                                                 |
| <b>Q8IVM0</b>    | CCDC50   | -0.226 | coiled-coil domain containing 50                                                 |
| <b>Q9P031</b>    | CCDC59   | -0.365 | coiled-coil domain containing 59                                                 |

|          |          |        |                                                               |
|----------|----------|--------|---------------------------------------------------------------|
| Q3V6T2-1 | CCDC88A  | -0.184 | coiled-coil domain containing 88A                             |
| P20248   | CCNA2    | 0.542  | cyclin A2                                                     |
| P14635   | CCNB1    | 0.245  | cyclin B1                                                     |
| O60563   | CCNT1    | 0.377  | cyclin T1                                                     |
| P49427   | CDC34    | 0.133  | cell division cycle 34                                        |
| O60508   | CDC40    | 0.125  | cell division cycle 40                                        |
| Q99618   | CDCA3    | 0.242  | cell division cycle associated 3                              |
| P19022   | CDH2     | -0.29  | cadherin 2                                                    |
| O14735   | CDIPT    | -0.582 | CDP-diacylglycerol--inositol 3-phosphatidyltransferase        |
| P06493   | CDK1     | 0.249  | cyclin dependent kinase 1                                     |
| Q00534   | CDK6     | -0.269 | cyclin dependent kinase 6                                     |
| P50750-2 | CDK9     | 0.224  | cyclin dependent kinase 9                                     |
| Q5VV42   | CDKAL1   | -0.482 | CDK5 regulatory subunit associated protein 1 like 1           |
| P38936   | CDKN1A   | 1.8    | cyclin dependent kinase inhibitor 1A                          |
| Q9NXV6   | CDKN2AIP | 0.328  | CDKN2A interacting protein                                    |
| Q9UHN6   | CEMIP2   | 0.255  | cell migration inducing hyaluronidase 2                       |
| P49454   | CENPF    | 0.382  | centromere protein F                                          |
| Q8TAP6   | CEP76    | 0.649  | centrosomal protein 76                                        |
| O00748   | CES2     | 0.297  | carboxylesterase 2                                            |
| Q9UEE9-1 | CFDP1    | -0.22  | craniofacial development protein 1                            |
| P05156   | CFI      | -0.343 | complement factor I                                           |
| Q0VF96   | CGNL1    | -0.996 | cingulin like 1                                               |
| Q13112   | CHAF1B   | 0.239  | chromatin assembly factor 1 subunit B                         |
| O14757   | CHEK1    | -0.482 | checkpoint kinase 1                                           |
| Q8IWX8   | CHERP    | 0.125  | calcium homeostasis endoplasmic reticulum protein             |
| P35790   | CHKA     | -0.42  | choline kinase alpha                                          |
| Q9Y3E7   | CHMP3    | 0.294  | charged multivesicular body protein 3                         |
| Q9H444   | CHMP4B   | 0.223  | charged multivesicular body protein 4B                        |
| Q8NET6   | CHST13   | -0.296 | carbohydrate sulfotransferase 13                              |
| Q99828-2 | CIB1     | 0.283  | calcium and integrin binding 1                                |
| O14578-4 | CIT      | -0.25  | citron rho-interacting serine/threonine kinase                |
| Q8WWK9   | CKAP2    | 0.652  | cytoskeleton associated protein 2                             |
| Q07065   | CKAP4    | 0.139  | cytoskeleton associated protein 4                             |
| P61024   | CKS1B    | 0.459  | CDC28 protein kinase regulatory subunit 1B                    |
| Q7Z460-1 | CLASP1   | -0.237 | cytoplasmic linker associated protein 1                       |
| O00299   | CLIC1    | 0.159  | chloride intracellular channel 1                              |
| Q9Y696   | CLIC4    | -0.169 | chloride intracellular channel 4                              |
| Q9H078-1 | CLPB     | -0.119 | ClpB homolog, mitochondrial AAA ATPase chaperonin             |
| O76031   | CLPX     | 0.191  | caseinolytic mitochondrial matrix peptidase chaperone subunit |
| I3L2B0   | CLUH     | -0.342 | clustered mitochondria homolog                                |
| O75153   | CLUH     | -0.242 | clustered mitochondria homolog                                |
| Q96DG6   | CMBL     | 0.67   | carboxymethylenebutenolidase homolog                          |
| Q8IY22   | CMIP     | -0.706 | c-Maf inducing protein                                        |
| Q9BQ75   | CMSS1    | -0.388 | cms1 ribosomal small subunit homolog                          |
| P62633   | CNBP     | -1.428 | CCHC-type zinc finger nucleic acid binding protein            |
| P62633-6 | CNBP     | -1.085 | CCHC-type zinc finger nucleic acid binding protein            |
| Q9H9A5-6 | CNOT10   | -0.136 | CCR4-NOT transcription complex subunit 10                     |

|            |                   |        |                                                             |
|------------|-------------------|--------|-------------------------------------------------------------|
| Q9UIV1-1   | CNOT7             | -0.25  | CCR4-NOT transcription complex subunit 7                    |
| Q96BR5     | COA7              | 0.284  | cytochrome c oxidase assembly factor 7 (putative)           |
| P38432     | COIL              | 0.193  | coilin                                                      |
| Q9P000-1   | COMM9             | -0.412 | COMM domain containing 9                                    |
| Q9ULV4-3   | CORO1C            | 0.152  | coronin 1C                                                  |
| A0A0A6YYL4 | CORO7/CORO7-PAM16 | -0.118 | coronin 7                                                   |
| P13073     | COX41             | 0.142  | cytochrome c oxidase subunit 41                             |
| O75976     | CPD               | -0.23  | carboxypeptidase D                                          |
| Q6PUV4     | CPLX2             | -0.609 | complexin 2                                                 |
| P23786     | CPT2              | 0.254  | carnitine palmitoyltransferase 2                            |
| P78560     | CRADD             | -0.421 | CASP2 and RIPK1 domain containing adaptor with death domain |
| P52943     | CRIP2             | 0.307  | cysteine rich protein 2                                     |
| Q8IUI8     | CRLF3             | -0.161 | cytokine receptor like factor 3                             |
| O75534-4   | CSDE1             | -0.179 | cold shock domain containing E1                             |
| Q12996     | CSTF3             | 0.318  | cleavage stimulation factor subunit 3                       |
| P35221     | CTNNA1            | -0.236 | catenin alpha 1                                             |
| Q9UBT7     | CTNNAL1           | -0.135 | catenin alpha like 1                                        |
| O60716-3   | CTNND1            | -0.111 | catenin delta 1                                             |
| Q9NRF8     | CTPS2             | -0.168 | CTP synthase 2                                              |
| Q6PD62     | CTR9              | 0.12   | CTR9 homolog, Paf1/RNA polymerase II complex component      |
| P07339     | CTSD              | 0.189  | cathepsin D                                                 |
| P07711     | CTSL              | 0.216  | cathepsin L                                                 |
| Q2VPK5     | CTU2              | -0.156 | cytosolic thiouridylase subunit 2                           |
| P39880-3   | CUX1              | -0.454 | cut like homeobox 1                                         |
| Q2TBE0     | CWF19L2           | -0.158 | CWF19 like cell cycle control factor 2                      |
| P99999     | CYCS              | 0.247  | cytochrome c, somatic                                       |
| Q96SQ9-2   | CYP2S1            | 0.182  | cytochrome P450 family 2 subfamily S member 1               |
| Q8TAV3     | CYP2W1            | -0.27  | cytochrome P450 family 2 subfamily W member 1               |
| Q9Y4D1     | DAAM1             | -0.24  | dishevelled associated activator of morphogenesis 1         |
| Q5VWQ8     | DAB2IP            | -0.218 | DAB2 interacting protein                                    |
| Q14118     | DAG1              | -0.186 | dystroglycan 1                                              |
| P51397     | DAP               | -0.185 | death associated protein                                    |
| Q9UK59     | DBR1              | 0.239  | debranching RNA lariats 1                                   |
| P11182     | DBT               | 0.192  | dihydrolipoamide branched chain transacylase E2             |
| P61962     | DCAF7             | 0.22   | DDB1 and CUL4 associated factor 7                           |
| Q9H773     | DCTPP1            | -0.19  | dCTP pyrophosphatase 1                                      |
| Q96GG9     | DCUN1D1           | 0.209  | defective in cullin neddylation 1 domain containing 1       |
| Q92466     | DDB2              | 0.556  | damage specific DNA binding protein 2                       |
| Q13206     | DDX10             | -0.249 | DEAD-box helicase 10                                        |
| Q96GQ7     | DDX27             | -0.238 | DEAD-box helicase 27                                        |
| Q9Y6V7     | DDX49             | -0.234 | DEAD-box helicase 49                                        |
| Q9NY93     | DDX56             | -0.524 | DEAD-box helicase 56                                        |
| P26196     | DDX6              | 0.165  | DEAD-box helicase 6                                         |
| Q8WYQ5-1   | DGCR8             | 0.301  | DGCR8 microprocessor complex subunit                        |
| Q5KSL6     | DGKK              | -0.346 | diacylglycerol kinase kappa                                 |
| Q86SQ9-2   | DHDDS             | -0.292 | dehydrodolichyl diphosphate synthase subunit                |
| Q8IY37     | DHX37             | -0.171 | DEAH-box helicase 37                                        |

|          |          |        |                                                             |
|----------|----------|--------|-------------------------------------------------------------|
| Q6P158-1 | DHX57    | -0.393 | DExH-box helicase 57                                        |
| O60610-1 | DIAPH1   | -0.14  | diaphanous related formin 1                                 |
| Q9BTC0   | DIDO1    | 0.254  | death inducer-obliterator 1                                 |
| Q9UNQ2   | DIMT1    | -0.281 | DIMT1 rRNA methyltransferase and ribosome maturation factor |
| Q9P265   | DIP2B    | -0.22  | disco interacting protein 2 homolog B                       |
| Q8IYB7   | DIS3L2   | -0.349 | DIS3 like 3'-5' exoribonuclease 2                           |
| P09622   | DLD      | 0.228  | dihydrolipoamide dehydrogenase                              |
| Q15398   | DLGAP5   | 0.383  | DLG associated protein 5                                    |
| P36957   | DLST     | 0.17   | dihydrolipoamide S-succinyltransferase                      |
| P11532-6 | DMD      | -0.125 | dystrophin                                                  |
| Q86Y56   | DNAAF5   | -0.288 | dynein axonemal assembly factor 5                           |
| P31689   | DNAJA1   | 0.161  | DnaJ heat shock protein family (Hsp40) member A1            |
| P25686-3 | DNAJB2   | 0.408  | DnaJ heat shock protein family (Hsp40) member B2            |
| Q8IXB1   | DNAJC10  | -0.118 | DnaJ heat shock protein family (Hsp40) member C10           |
| Q9Y5T4   | DNAJC15  | -0.695 | DnaJ heat shock protein family (Hsp40) member C15           |
| Q9ULA0   | DNPEP    | -0.103 | aspartyl aminopeptidase                                     |
| Q9BU89   | DOHH     | 0.275  | deoxyhypusine hydroxylase                                   |
| Q9BQC3   | DPH2     | -0.113 | diphthamide biosynthesis 2                                  |
| Q9H2P9-5 | DPH5     | -0.297 | diphthamide biosynthesis 5                                  |
| Q16555   | DPYSL2   | -0.149 | dihydropyrimidinase like 2                                  |
| Q8TE96   | DQX1     | 0.276  | DEAQ-box RNA dependent ATPase 1                             |
| Q14919-2 | DRAP1    | 0.205  | DR1 associated protein 1                                    |
| Q9Y295   | DRG1     | -0.279 | developmentally regulated GTP binding protein 1             |
| P60981-1 | DSTN     | 0.196  | destrin, actin depolymerizing factor                        |
| Q99956   | DUSP9    | -0.219 | dual specificity phosphatase 9                              |
| O14641   | DVL2     | -0.364 | dishevelled segment polarity protein 2                      |
| Q14204   | DYNC1H1  | -0.118 | dynein cytoplasmic 1 heavy chain 1                          |
| P63167   | DYNLL1   | 0.405  | dynein light chain LC8-type 1                               |
| Q99848   | EBNA1BP2 | -0.277 | EBNA1 binding protein 2                                     |
| P42892   | ECE1     | -0.323 | endothelin converting enzyme 1                              |
| Q13011   | ECH1     | 0.147  | enoyl-CoA hydratase 1                                       |
| Q9NTX5   | ECHDC1   | 0.137  | ethylmalonyl-CoA decarboxylase 1                            |
| O75521   | ECI2     | 0.201  | enoyl-CoA delta isomerase 2                                 |
| Q9H8V3-3 | ECT2     | 0.333  | epithelial cell transforming 2                              |
| P13639   | EEF2     | -0.168 | eukaryotic translation elongation factor 2                  |
| Q7Z222   | EFL1     | -0.177 | elongation factor like GTPase 1                             |
| Q8NDI1   | EHBP1    | -0.333 | EH domain binding protein 1                                 |
| Q9H223   | EHD4     | -0.222 | EH domain containing 4                                      |
| P41567   | EIF1     | 0.25   | eukaryotic translation initiation factor 1                  |
| Q9NZJ5   | EIF2AK3  | -0.222 | eukaryotic translation initiation factor 2 alpha kinase 3   |
| P41214   | EIF2D    | -0.218 | eukaryotic translation initiation factor 2D                 |
| Q9UBQ5   | EIF3K    | -0.191 | eukaryotic translation initiation factor 3 subunit K        |
| O60573   | EIF4E2   | -0.192 | eukaryotic translation initiation factor 4E family member 2 |
| O43432-3 | EIF4G3   | -0.3   | eukaryotic translation initiation factor 4 gamma 3          |
| P55199   | ELL      | 0.295  | elongation factor for RNA polymerase II                     |
| O95163   | ELP1     | -0.111 | elongator complex protein 1                                 |
| Q9H9T3   | ELP3     | -0.212 | elongator acetyltransferase complex subunit 3               |

|            |         |        |                                                              |
|------------|---------|--------|--------------------------------------------------------------|
| Q14249     | ENDOG   | 0.186  | endonuclease G                                               |
| P13929-1   | ENO3    | -0.172 | enolase 3                                                    |
| Q5NDL2     | EOGT    | -0.18  | EGF domain specific O-linked N-acetylglucosamine transferase |
| Q96L91     | EP400   | -0.155 | E1A binding protein p400                                     |
| P29317     | EPHA2   | 0.697  | EPH receptor A2                                              |
| P54760     | EPHB4   | 0.379  | EPH receptor B4                                              |
| P07099     | EPHX1   | 0.244  | epoxide hydrolase 1                                          |
| P34913     | EPHX2   | -0.194 | epoxide hydrolase 2                                          |
| A0A087X1U6 | EPPK1   | 0.333  | epiplakin 1                                                  |
| P58107     | EPPK1   | 0.292  | epiplakin 1                                                  |
| P42566     | EPS15   | -0.14  | epidermal growth factor receptor pathway substrate 15        |
| Q9H6S3     | EPS8L2  | 0.279  | EPS8 like 2                                                  |
| P04626     | ERBB2   | -0.204 | erb-b2 receptor tyrosine kinase 2                            |
| Q96RT1-8   | ERBIN   | -0.108 | erbb2 interacting protein                                    |
| Q8IU2-1    | ERC1    | -0.449 | ELKS/RAB6-interacting/CAST family member 1                   |
| P18074-1   | ERCC2   | -0.142 | ERCC excision repair 2, TFIIH core complex helicase subunit  |
| P19447     | ERCC3   | 0.21   | ERCC excision repair 3, TFIIH core complex helicase subunit  |
| Q9Y282-3   | ERGIC3  | 0.184  | ERGIC and golgi 3                                            |
| P84090     | ERH     | 0.201  | ERH mRNA splicing and mitosis factor                         |
| B1AK53-1   | ESPN    | -0.377 | espin                                                        |
| A0FGR8-2   | ESYT2   | 0.14   | extended synaptotagmin 2                                     |
| O60645     | EXOC3   | -0.375 | exocyst complex component 3                                  |
| Q96A65     | EXOC4   | -0.318 | exocyst complex component 4                                  |
| Q9Y2D4     | EXOC6B  | -0.557 | exocyst complex component 6B                                 |
| Q9NQ4      | EXOSC5  | 0.13   | exosome component 5                                          |
| Q9Y624     | F11R    | 0.278  | F11 receptor                                                 |
| Q9UNN5     | FAF1    | -0.506 | Fas associated factor 1                                      |
| Q96CS3     | FAF2    | 0.16   | Fas associated factor family member 2                        |
| Q9Y6X4-1   | FAM169A | 0.234  | family with sequence similarity 169 member A                 |
| Q9NSI2     | FAM207A | -0.386 | family with sequence similarity 207 member A                 |
| O75063     | FAM20B  | -0.127 | FAM20B glycosaminoglycan xylosylkinase                       |
| Q96KR6     | FAM210B | 0.547  | family with sequence similarity 210 member B                 |
| Q9H4H8     | FAM83D  | 0.304  | family with sequence similarity 83 member D                  |
| Q52LJ0-2   | FAM98B  | 0.156  | family with sequence similarity 98 member B                  |
| P25445     | FAS     | 0.834  | Fas cell surface death receptor                              |
| P49327     | FASN    | -0.246 | fatty acid synthase                                          |
| Q14517     | FAT1    | 0.154  | FAT atypical cadherin 1                                      |
| Q8NEZ5     | FBXO22  | 0.33   | F-box protein 22                                             |
| O94868     | FCHSD2  | -0.293 | FCH and double SH3 domains 2                                 |
| P22570-7   | FDXR    | 0.614  | ferredoxin reductase                                         |
| Q9BQL6     | FERMT1  | -0.094 | fermitin family member 1                                     |
| P02671-2   | FGA     | -0.383 | fibrinogen alpha chain                                       |
| P22455-1   | FGFR4   | -0.536 | fibroblast growth factor receptor 4                          |
| P02679     | FGG     | -0.364 | fibrinogen gamma chain                                       |
| Q9Y613     | FHOD1   | -0.247 | formin homology 2 domain containing 1                        |
| O95302-3   | FKBP9   | 0.213  | FKBP prolyl isomerase 9                                      |
| Q14254     | FLOT2   | 0.138  | flotillin 2                                                  |

|           |         |        |                                                       |
|-----------|---------|--------|-------------------------------------------------------|
| Q9Y5Y0    | FLVCR1  | -0.271 | feline leukemia virus subgroup C cellular receptor 1  |
| Q96PY5-3  | FMNL2   | -0.27  | formin like 2                                         |
| P02751-15 | FN1     | -0.343 | fibronectin 1                                         |
| Q53EP0    | FNDC3B  | -0.353 | fibronectin type III domain containing 3B             |
| Q5VW36    | FOCAD   | -0.309 | focadhesin                                            |
| P15407    | FOSL1   | 0.937  | FOS like 1, AP-1 transcription factor subunit         |
| Q8IWF2    | FOXRED2 | -0.265 | FAD dependent oxidoreductase domain containing 2      |
| Q86XX4-2  | FRAS1   | -1.025 | Fraser extracellular matrix complex subunit 1         |
| Q16658    | FSCN1   | 0.12   | fascin actin-bundling protein 1                       |
| P02792    | FTL     | 0.311  | ferritin light chain                                  |
| Q9C0B1-1  | FTO     | -0.31  | FTO alpha-ketoglutarate dependent dioxygenase         |
| Q9BTY2    | FUCA2   | 0.188  | alpha-L-fucosidase 2                                  |
| Q06546    | GABPA   | -0.223 | GA binding protein transcription factor subunit alpha |
| Q14376    | GALE    | -0.107 | UDP-galactose-4-epimerase                             |
| O43903    | GAS2    | -0.2   | growth arrest specific 2                              |
| P04062    | GBA     | 0.125  | glucosylceramidase beta                               |
| Q8IWIJ2   | GCC2    | 0.147  | GRIP and coiled-coil domain containing 2              |
| Q99988    | GDF15   | 0.839  | growth differentiation factor 15                      |
| P31150    | GDI1    | 0.175  | GDP dissociation inhibitor 1                          |
| Q06210    | GFPT1   | -0.161 | glutamine--fructose-6-phosphate transaminase 1        |
| Q9BRT9    | GINS4   | 0.149  | GINS complex subunit 4                                |
| Q9Y2X7-3  | GIT1    | 0.257  | GIT ArfGAP 1                                          |
| P08034    | GJB1    | -0.637 | gap junction protein beta 1                           |
| O94925    | GLS     | 0.611  | glutaminase                                           |
| P15104    | GLUL    | -0.227 | glutamate-ammonia ligase                              |
| P17900    | GM2A    | 0.723  | GM2 ganglioside activator                             |
| O60547    | GMDS    | -0.255 | GDP-mannose 4,6-dehydratase                           |
| O75496    | GMNN    | 0.403  | geminin DNA replication inhibitor                     |
| Q9Y5P6-2  | GMPPB   | -0.188 | GDP-mannose pyrophosphorylase B                       |
| P29992    | GNA11   | 0.195  | G protein subunit alpha 11                            |
| Q13823    | GNL2    | -0.409 | G protein nucleolar 2                                 |
| Q9BVP2    | GNL3    | -0.452 | G protein nucleolar 3                                 |
| Q9NVN8    | GNL3L   | -0.283 | G protein nucleolar 3 like                            |
| Q9Y3E0    | GOLT1B  | 0.141  | golgi transport 1B                                    |
| P17174    | GOT1    | 0.297  | glutamic-oxaloacetic transaminase 1                   |
| P00505    | GOT2    | 0.207  | glutamic-oxaloacetic transaminase 2                   |
| P35052    | GPC1    | 0.393  | glypican 1                                            |
| P51654-1  | GPC3    | -0.235 | glypican 3                                            |
| Q9Y625    | GPC6    | -0.563 | glypican 6                                            |
| Q9NQX3-2  | GPHN    | -0.445 | gephyrin                                              |
| Q13889    | GTF2H3  | 0.294  | general transcription factor IIH subunit 3            |
| Q9BZE4    | GTPBP4  | -0.407 | GTP binding protein 4                                 |
| Q9NYZ3    | GTSE1   | 0.454  | G2 and S-phase expressed 1                            |
| Q4G148    | GXYLT1  | 0.389  | glucoside xylosyltransferase 1                        |
| O14929    | HAT1    | 0.107  | histone acetyltransferase 1                           |
| Q00341    | HDLBP   | -0.231 | high density lipoprotein binding protein              |
| Q86XA9    | HEATR5A | -0.194 | HEAT repeat containing 5A                             |

|          |         |        |                                                                              |
|----------|---------|--------|------------------------------------------------------------------------------|
| Q9BYK8   | HELZ2   | 0.292  | helicase with zinc finger 2                                                  |
| Q15011-1 | HERPUD1 | -0.783 | homocysteine inducible ER protein with ubiquitin like domain 1               |
| O94992   | HEXIM1  | 0.431  | HEXIM P-TEFb complex subunit 1                                               |
| Q9BTY7   | HGH1    | -0.187 | HGH1 homolog                                                                 |
| P01892   | HLA-A   | 0.194  | major histocompatibility complex, class I, A                                 |
| P05534   | HLA-A   | 0.236  | major histocompatibility complex, class I, A                                 |
| Q14527   | HLTF    | -0.513 | helicase like transcription factor                                           |
| Q8TCT9   | HM13    | -0.131 | histocompatibility minor 13                                                  |
| P09429   | HMGB1   | 0.209  | high mobility group box 1                                                    |
| P35914   | HMGCL   | 0.234  | 3-hydroxy-3-methylglutaryl-CoA lyase                                         |
| Q01581   | HMGCS1  | -0.339 | 3-hydroxy-3-methylglutaryl-CoA synthase 1                                    |
| P05204   | HMGN2   | 0.307  | high mobility group nucleosomal binding domain 2                             |
| O75330-3 | HMMR    | 0.462  | hyaluronan mediated motility receptor                                        |
| P20823-7 | HNF1A   | -0.197 | HNF1 homeobox A                                                              |
| P41235-4 | HNF4A   | -0.396 | hepatocyte nuclear factor 4 alpha                                            |
| Q9UJC3   | HOOK1   | -0.162 | hook microtubule tethering protein 1                                         |
| P00738   | HP      | -0.366 | haptoglobin                                                                  |
| P37235   | HPCAL1  | -0.158 | hippocalcin like 1                                                           |
| P37059   | HSD17B2 | 0.14   | hydroxysteroid 17-beta dehydrogenase 2                                       |
| Q9H2F3   | HSD3B7  | -0.109 | hydroxy-delta-5-steroid dehydrogenase, 3 beta- and steroid delta-isomerase 7 |
| Q6YN16   | HSDL2   | 0.191  | hydroxysteroid dehydrogenase like 2                                          |
| O95757   | HSPA4L  | 0.327  | heat shock protein family A (Hsp70) member 4 like                            |
| P04792   | HSPB1   | 0.373  | heat shock protein family B (small) member 1                                 |
| P98160   | HSPG2   | -0.538 | heparan sulfate proteoglycan 2                                               |
| Q92598   | HSPH1   | 0.204  | heat shock protein family H (Hsp110) member 1                                |
| P42858   | HTT     | -0.176 | huntingtin                                                                   |
| Q7Z6Z7   | HUWE1   | -0.149 | HECT, UBA and WWE domain containing E3 ubiquitin protein ligase 1            |
| Q9P2D0   | IBTK    | -0.287 | inhibitor of Bruton tyrosine kinase                                          |
| P05362   | ICAM1   | 0.174  | intercellular adhesion molecule 1                                            |
| P48735   | IDH2    | 0.215  | isocitrate dehydrogenase (NADP(+)) 2                                         |
| P15260   | IFNGR1  | -0.338 | interferon gamma receptor 1                                                  |
| Q12894-2 | IFRD2   | -0.283 | interferon related developmental regulator 2                                 |
| P11717   | IGF2R   | -0.234 | insulin like growth factor 2 receptor                                        |
| P08833   | IGFBP1  | 1.137  | insulin like growth factor binding protein 1                                 |
| Q8N6C5-4 | IGSF1   | -0.26  | immunoglobulin superfamily member 1                                          |
| Q70UQ0   | IKBIP   | 0.437  | IKBKB interacting protein                                                    |
| Q70UQ0-4 | IKBIP   | 0.375  | IKBKB interacting protein                                                    |
| P40189   | IL6ST   | -0.365 | interleukin 6 signal transducer                                              |
| Q9NQS7   | INCENP  | 0.535  | inner centromere protein                                                     |
| Q27J81   | INF2    | -0.197 | inverted formin, FH2 and WH2 domain containing                               |
| P49441   | INPP1   | 0.378  | inositol polyphosphate-1-phosphatase                                         |
| Q92835   | INPP5D  | -0.299 | inositol polyphosphate-5-phosphatase D                                       |
| P06213   | INSR    | -0.319 | insulin receptor                                                             |
| Q5TA45-5 | INTS11  | -0.181 | integrator complex subunit 11                                                |
| Q96HW7   | INTS4   | -0.147 | integrator complex subunit 4                                                 |
| Q9UI26-2 | IPO11   | -0.148 | importin 11                                                                  |
| Q8TEX9-2 | IPO4    | -0.16  | importin 4                                                                   |

|          |           |        |                                                               |
|----------|-----------|--------|---------------------------------------------------------------|
| O00410-3 | IPO5      | -0.147 | importin 5                                                    |
| O95373   | IPO7      | -0.21  | importin 7                                                    |
| Q13576-1 | IQGAP2    | -0.268 | IQ motif containing GTPase activating protein 2               |
| Q6DN90   | IQSEC1    | -0.249 | IQ motif and Sec7 domain ArfGEF 1                             |
| Q9H1K1   | ISCU      | 0.343  | iron-sulfur cluster assembly enzyme                           |
| P05161   | ISG15     | 0.26   | ISG15 ubiquitin like modifier                                 |
| Q9H9L3   | ISG20L2   | -0.198 | interferon stimulated exonuclease gene 20 like 2              |
| Q96CN7   | ISOC1     | 0.147  | isochorismatase domain containing 1                           |
| Q9NPH2   | ISYNA1    | 0.472  | inositol-3-phosphate synthase 1                               |
| P23229-1 | ITGA6     | -0.279 | integrin subunit alpha 6                                      |
| P06756   | ITGAV     | 0.146  | integrin subunit alpha V                                      |
| Q14571   | ITPR2     | -0.194 | inositol 1,4,5-trisphosphate receptor type 2                  |
| P23458   | JAK1      | -0.428 | Janus kinase 1                                                |
| Q7L273   | KCTD9     | 0.383  | potassium channel tetramerization domain containing 9         |
| Q9Y4C1   | KDM3A     | 0.45   | lysine demethylase 3A                                         |
| Q14145   | KEAP1     | 0.132  | kelch like ECH associated protein 1                           |
| Q5T5P2-1 | KIAA1217  | -0.24  | KIAA1217                                                      |
| Q9P206-2 | KIAA1522  | -0.126 | KIAA1522                                                      |
| Q9BY89-1 | KIAA1671  | -0.363 | KIAA1671                                                      |
| Q9ULH0-1 | KIDINS220 | -0.213 | kinase D interacting substrate 220                            |
| P52732   | KIF11     | 0.161  | kinesin family member 11                                      |
| Q9NQT8   | KIF13B    | -0.219 | kinesin family member 13B                                     |
| Q9NS87   | KIF15     | -0.193 | kinesin family member 15                                      |
| Q96L93-2 | KIF16B    | -0.494 | kinesin family member 16B                                     |
| Q86Y91-4 | KIF18B    | 0.353  | kinesin family member 18B                                     |
| O60333-4 | KIF1B     | -0.126 | kinesin family member 1B                                      |
| O95235   | KIF20A    | 0.455  | kinesin family member 20A                                     |
| Q96Q89-2 | KIF20B    | 0.311  | kinesin family member 20B                                     |
| Q14807   | KIF22     | 0.179  | kinesin family member 22                                      |
| Q99661   | KIF2C     | 0.263  | kinesin family member 2C                                      |
| Q9BW19   | KIFC1     | 0.323  | kinesin family member C1                                      |
| Q9NSK0-3 | KLC4      | -0.138 | kinesin light chain 4                                         |
| Q9BXX1   | KLF16     | -0.432 | Kruppel like factor 16                                        |
| P52292   | KPNA2     | 0.162  | karyopherin subunit alpha 2                                   |
| P83111-1 | LACTB     | 0.308  | lactamase beta                                                |
| O15230   | LAMA5     | -0.401 | laminin subunit alpha 5                                       |
| P11279   | LAMP1     | 0.267  | lysosomal associated membrane protein 1                       |
| O43813   | LANCL1    | -0.206 | LanC like 1                                                   |
| Q659C4   | LARP1B    | -0.377 | La ribonucleoprotein domain family member 1B                  |
| P01130   | LDLR      | -0.245 | low density lipoprotein receptor                              |
| O95202   | LETM1     | 0.204  | leucine zipper and EF-hand containing transmembrane protein 1 |
| Q99538   | LGMN      | 0.288  | legumain                                                      |
| P18858   | LIG1      | 0.127  | DNA ligase 1                                                  |
| Q6P1M3-1 | LLGL2     | -0.207 | LLGL scribble cell polarity complex component 2               |
| Q9BRT6   | LLPH      | -0.363 | LLP homolog, long-term synaptic facilitation factor           |
| Q9BU23-1 | LMF2      | 0.134  | lipase maturation factor 2                                    |
| Q8NF37   | LPCAT1    | -0.189 | lysophosphatidylcholine acyltransferase 1                     |

|           |          |        |                                                                             |
|-----------|----------|--------|-----------------------------------------------------------------------------|
| Q93052    | LPP      | -0.436 | LIM domain containing preferred translocation partner in lipoma             |
| P50851-2  | LRBA     | -0.279 | LPS responsive beige-like anchor protein                                    |
| Q7Z4F1    | LRP10    | 0.97   | LDL receptor related protein 10                                             |
| P30533    | LRPAP1   | 0.198  | LDL receptor related protein associated protein 1                           |
| Q9H9A6    | LRRC40   | -0.104 | leucine rich repeat containing 40                                           |
| Q8IWT6    | LRRC8A   | 0.158  | leucine rich repeat containing 8 VRAC subunit A                             |
| Q9UFC0    | LRWD1    | 0.128  | leucine rich repeats and WD repeat domain containing 1                      |
| O15116    | LSM1     | 0.187  | LSM1 homolog, mRNA degradation associated                                   |
| P48449    | LSS      | -0.138 | lanosterol synthase                                                         |
| Q96GA3    | LTV1     | -0.368 | LTV1 ribosome biogenesis factor                                             |
| Q9Y383    | LUC7L2   | 0.211  | LUC7 like 2, pre-mRNA splicing factor                                       |
| P61626    | LYZ      | 0.303  | lysozyme                                                                    |
| Q9UPN3    | MACF1    | -0.27  | microtubule actin crosslinking factor 1                                     |
| Q9Y6D9    | MAD1L1   | -0.286 | mitotic arrest deficient 1 like 1                                           |
| Q8WXG6-4  | MADD     | 0.231  | MAP kinase activating death domain                                          |
| Q9Y5V3-2  | MAGED1   | -0.401 | MAGE family member D1                                                       |
| Q96QZ7    | MAGI1    | -0.474 | membrane associated guanylate kinase, WW and PDZ domain containing 1        |
| Q9UDY8    | MALT1    | -0.141 | MALT1 paracaspase                                                           |
| P33908    | MAN1A1   | -0.209 | mannosidase alpha class 1A member 1                                         |
| Q9NYL2    | MAP3K20  | -0.325 | mitogen-activated protein kinase kinase kinase 20                           |
| P27816-1  | MAP4     | -0.322 | microtubule associated protein 4                                            |
| Q15691    | MAPRE1   | 0.187  | microtubule associated protein RP/EB family member 1                        |
| P49006    | MARCKSL1 | 0.203  | MARCKS like 1                                                               |
| P43121    | MCAM     | 0.496  | melanoma cell adhesion molecule                                             |
| Q8NI22    | MCFD2    | -0.212 | multiple coagulation factor deficiency 2                                    |
| P25205-2  | MCM3     | -0.167 | minichromosome maintenance complex component 3                              |
| P33992    | MCM5     | -0.196 | minichromosome maintenance complex component 5                              |
| Q14676    | MDC1     | -0.228 | mediator of DNA damage checkpoint 1                                         |
| P40926    | MDH2     | 0.179  | malate dehydrogenase 2                                                      |
| Q00987-11 | MDM2     | 0.624  | MDM2 proto-oncogene                                                         |
| Q9NU22    | MDN1     | -0.137 | midasin AAA ATPase 1                                                        |
| Q9NPJ6    | MED4     | 0.143  | mediator complex subunit 4                                                  |
| Q9H8H3    | METTL7A  | 0.226  | methyltransferase like 7A                                                   |
| P26572    | MGAT1    | 0.137  | mannosyl (alpha-1,3-)-glycoprotein beta-1,2-N-acetylglucosaminyltransferase |
| Q09328    | MGAT5    | -0.437 | alpha-1,6-mannosylglycoprotein 6-beta-N-acetylglucosaminyltransferase       |
| Q9BQP7    | MGME1    | 0.376  | mitochondrial genome maintenance exonuclease 1                              |
| P16455    | MGMT     | -0.263 | O-6-methylguanine-DNA methyltransferase                                     |
| Q8N3F8    | MICALL1  | 0.45   | MICAL like 1                                                                |
| Q8IYU8    | MICU2    | -0.202 | mitochondrial calcium uptake 2                                              |
| Q9NPA3    | MID1IP1  | -0.383 | MID1 interacting protein 1                                                  |
| Q9H000    | MKRN2    | -0.191 | makorin ring finger protein 2                                               |
| Q14165    | MLEC     | 0.11   | malectin                                                                    |
| Q15773    | MLF2     | 0.342  | myeloid leukemia factor 2                                                   |
| P51511    | MMP15    | -0.43  | matrix metalloproteinase 15                                                 |
| Q96EN8    | MOCOS    | -0.145 | molybdenum cofactor sulfurase                                               |
| Q15014    | MORF4L2  | -0.386 | mortality factor 4 like 2                                                   |
| Q9Y5U8    | MPC1     | 0.277  | mitochondrial pyruvate carrier 1                                            |

|          |         |        |                                                                   |
|----------|---------|--------|-------------------------------------------------------------------|
| P29372   | MPG     | -0.182 | N-methylpurine DNA glycosylase                                    |
| Q8N3R9-1 | MPP5    | -0.207 | membrane palmitoylated protein 5                                  |
| Q5T2T1   | MPP7    | -0.233 | membrane palmitoylated protein 7                                  |
| Q9Y605   | MRFAP1  | -0.303 | Morf4 family associated protein 1                                 |
| Q9NV56   | MRGBP   | 0.125  | MRG domain binding protein                                        |
| Q9NYK5   | MRPL39  | 0.169  | mitochondrial ribosomal protein L39                               |
| Q86TS9   | MRPL52  | 0.211  | mitochondrial ribosomal protein L52                               |
| P82663   | MRPS25  | 0.164  | mitochondrial ribosomal protein S25                               |
| Q9ULH7-5 | MRTFB   | -0.225 | myocardin related transcription factor B                          |
| O94776   | MTA2    | 0.189  | metastasis associated 1 family member 2                           |
| Q13496   | MTM1    | -0.227 | myotubularin 1                                                    |
| P42345   | MTOR    | -0.162 | mechanistic target of rapamycin kinase                            |
| Q99707   | MTR     | -0.196 | 5-methyltetrahydrofolate-homocysteine methyltransferase           |
| Q9UBK8-1 | MTRR    | -0.222 | 5-methyltetrahydrofolate-homocysteine methyltransferase reductase |
| Q765P7   | MTSS2   | -0.132 | MTSS I-BAR domain containing 2                                    |
| P84157-2 | MXRA7   | 0.335  | matrix remodeling associated 7                                    |
| Q969H8   | MYDGF   | 0.192  | myeloid derived growth factor                                     |
| Q7Z406-2 | MYH14   | -0.165 | myosin heavy chain 14                                             |
| O14950   | MYL12B  | -0.185 | myosin light chain 12B                                            |
| Q15746   | MYLK    | -0.24  | myosin light chain kinase                                         |
| Q92614-1 | MYO18A  | -0.212 | myosin XVIII A                                                    |
| O94832   | MYO1D   | -0.229 | myosin ID                                                         |
| Q12965   | MYO1E   | -0.173 | myosin IE                                                         |
| Q9NQX4   | MYO5C   | -0.175 | myosin VC                                                         |
| Q6NSJ0   | MYORG   | -0.355 | myogenesis regulating glycosidase (putative)                      |
| Q14CX7   | NAA25   | -0.165 | N(alpha)-acetyltransferase 25, NatB auxiliary subunit             |
| A2RRP1   | NBAS    | -0.295 | NBAS subunit of NRZ tethering complex                             |
| Q15021   | NCAPD2  | -0.13  | non-SMC condensin I complex subunit D2                            |
| Q6PIU2-2 | NCEH1   | 0.182  | neutral cholesterol ester hydrolase 1                             |
| Q9NZQ3   | NCKIPSD | 0.16   | NCK interacting protein with SH3 domain                           |
| Q68D85   | NCR3LG1 | -0.347 | natural killer cell cytotoxicity receptor 3 ligand 1              |
| Q92542-1 | NCSTN   | 0.156  | nicastatin                                                        |
| Q9UGV2   | NDRG3   | -0.295 | NDRG family member 3                                              |
| Q9UI09   | NDUFA12 | 0.14   | NADH:ubiquinone oxidoreductase subunit A12                        |
| P56556   | NDUFA6  | 0.216  | NADH:ubiquinone oxidoreductase subunit A6                         |
| P51970   | NDUFA8  | 0.394  | NADH:ubiquinone oxidoreductase subunit A8                         |
| O14561   | NDUFAB1 | 0.213  | NADH:ubiquinone oxidoreductase subunit AB1                        |
| P28331-2 | NDUFS1  | 0.104  | NADH:ubiquinone oxidoreductase core subunit S1                    |
| O43181   | NDUFS4  | 0.205  | NADH:ubiquinone oxidoreductase subunit S4                         |
| O43920   | NDUFS5  | 0.237  | NADH:ubiquinone oxidoreductase subunit S5                         |
| P46934-4 | NEDD4   | -0.23  | NEDD4 E3 ubiquitin protein ligase                                 |
| P48681   | NES     | -0.222 | nestin                                                            |
| Q99519   | NEU1    | 0.207  | neuraminidase 1                                                   |
| Q8N5V2   | NGEF    | -0.551 | neuronal guanine nucleotide exchange factor                       |
| Q9H9Q4-2 | NHEJ1   | -0.248 | non-homologous end joining factor 1                               |
| P14543-1 | NID1    | -0.374 | nidogen 1                                                         |
| Q9BYG3   | NIFK    | -0.248 | nucleolar protein interacting with the FHA domain of MKI67        |

|          |        |        |                                                                                     |
|----------|--------|--------|-------------------------------------------------------------------------------------|
| Q92982   | NINJ1  | 0.361  | ninjurin 1                                                                          |
| Q969G9   | NKD1   | -0.597 | NKD inhibitor of WNT signaling pathway 1                                            |
| Q9ULX3   | NOB1   | -0.175 | NIN1 (RPN12) binding protein 1 homolog                                              |
| Q9BSC4   | NOL10  | -0.132 | nucleolar protein 10                                                                |
| Q9UGY1   | NOL12  | -0.182 | nucleolar protein 12                                                                |
| Q9H6R4-1 | NOL6   | -0.177 | nucleolar protein 6                                                                 |
| Q9UMY1   | NOL7   | -0.248 | nucleolar protein 7                                                                 |
| Q9Y3C1   | NOP16  | -0.366 | NOP16 nucleolar protein                                                             |
| Q9NZM5   | NOP53  | -0.407 | NOP53 ribosome biogenesis factor                                                    |
| P29474   | NOS3   | -0.31  | nitric oxide synthase 3                                                             |
| P61916   | NPC2   | 0.264  | NPC intracellular cholesterol transporter 2                                         |
| O95478   | NSA2   | -0.676 | NSA2 ribosome biogenesis factor                                                     |
| P49902   | NT5C2  | -0.177 | 5'-nucleotidase, cytosolic II                                                       |
| Q9BSD7   | NTPCR  | 0.259  | nucleoside-triphosphatase, cancer-related                                           |
| Q8IVD9   | NUDCD3 | -0.221 | NudC domain containing 3                                                            |
| P50583   | NUDT2  | -0.181 | nudix hydrolase 2                                                                   |
| O43809   | NUDT21 | 0.173  | nudix hydrolase 21                                                                  |
| Q7Z417   | NUFIP2 | 0.111  | nuclear FMR1 interacting protein 2                                                  |
| P49757   | NUMB   | -0.133 | NUMB endocytic adaptor protein                                                      |
| P49790   | NUP153 | 0.126  | nucleoporin 153                                                                     |
| Q8NFH4   | NUP37  | 0.182  | nucleoporin 37                                                                      |
| Q7Z3B4   | NUP54  | 0.156  | nucleoporin 54                                                                      |
| Q9UBU9-1 | NXF1   | 0.125  | nuclear RNA export factor 1                                                         |
| P04181   | OAT    | 0.323  | ornithine aminotransferase                                                          |
| Q9NX40   | OCIAD1 | 0.137  | OCIA domain containing 1                                                            |
| Q16625   | OCLN   | -0.136 | occludin                                                                            |
| O60502   | OGA    | 0.172  | O-GlcNAcase                                                                         |
| Q8N543   | OGFOD1 | 0.199  | 2-oxoglutarate and iron dependent oxygenase domain containing 1                     |
| O15294   | OGT    | -0.144 | O-linked N-acetylglucosamine (GlcNAc) transferase                                   |
| Q9H6K4   | OPA3   | 0.24   | outer mitochondrial membrane lipid metabolism regulator OPA3                        |
| O14841   | OPLAH  | -0.146 | 5-oxoprolinase, ATP-hydrolysing                                                     |
| Q6GQQ9-1 | OTUD7B | 0.248  | OTU deubiquitinase 7B                                                               |
| O15460   | P4HA2  | 0.405  | prolyl 4-hydroxylase subunit alpha 2                                                |
| Q6VY07-2 | PACS1  | -0.334 | phosphofurin acidic cluster sorting protein 1                                       |
| P00439   | PAH    | -0.252 | phenylalanine hydroxylase                                                           |
| P22234-2 | PAICS  | -0.124 | phosphoribosylaminoimidazole carboxylase and phosphoribosylaminoimidazolesuccinocar |
| O96013   | PAK4   | -0.339 | p21 (RAC1) activated kinase 4                                                       |
| O95453   | PARN   | -0.128 | poly(A)-specific ribonuclease                                                       |
| Q9UUK3   | PARP4  | -0.172 | poly(ADP-ribose) polymerase family member 4                                         |
| Q9NVD7   | PARVA  | -0.248 | parvin alpha                                                                        |
| P05166-2 | PCCB   | -0.208 | propionyl-CoA carboxylase subunit beta                                              |
| P12004   | PCNA   | 0.42   | proliferating cell nuclear antigen                                                  |
| Q99447   | PCYT2  | -0.163 | phosphate cytidyltransferase 2, ethanolamine                                        |
| Q9GZU2   | PEG3   | -0.15  | paternally expressed 3                                                              |
| O15067   | PFAS   | -0.209 | phosphoribosylformylglycinamide synthase                                            |
| Q01813   | PFKP   | -0.299 | phosphofructokinase, platelet                                                       |
| Q7RTV0   | PHF5A  | 0.22   | PHD finger protein 5A                                                               |

|          |         |        |                                                                      |
|----------|---------|--------|----------------------------------------------------------------------|
| Q6NSJ2-1 | PHLDB3  | 0.319  | pleckstrin homology like domain family B member 3                    |
| Q9P1Y6   | PHRF1   | -0.19  | PHD and ring finger domains 1                                        |
| Q13492   | PICALM  | 0.159  | phosphatidylinositol binding clathrin assembly protein               |
| Q92643   | PIGK    | 0.143  | phosphatidylinositol glycan anchor biosynthesis class K              |
| Q8TEQ8-1 | PIGO    | -0.229 | phosphatidylinositol glycan anchor biosynthesis class O              |
| Q9H490   | PIGU    | -0.275 | phosphatidylinositol glycan anchor biosynthesis class U              |
| Q9Y237-2 | PIN4    | -0.135 | peptidylprolyl cis/trans isomerase, NIMA-interacting 4               |
| Q96BK5   | PINX1   | -0.236 | PIN2 (TERF1) interacting telomerase inhibitor 1                      |
| Q9UG56-3 | PISD    | -0.114 | phosphatidylserine decarboxylase                                     |
| P30613   | PKLR    | -0.268 | pyruvate kinase L/R                                                  |
| Q16513   | PKN2    | -0.215 | protein kinase N2                                                    |
| Q6IQ23-2 | PLEKHA7 | -0.506 | pleckstrin homology domain containing A7                             |
| Q99541   | PLIN2   | 0.384  | perilipin 2                                                          |
| O43660   | PLRG1   | 0.109  | pleiotropic regulator 1                                              |
| Q14651   | PLS1    | -0.175 | plastin 1                                                            |
| O43157   | PLXNB1  | -0.14  | plexin B1                                                            |
| O15031   | PLXNB2  | 0.24   | plexin B2                                                            |
| P29590   | PML     | 0.226  | promyelocytic leukemia                                               |
| O15305   | PMM2    | -0.162 | phosphomannomutase 2                                                 |
| Q8N490   | PNKD    | -0.602 | PNKD metallo-beta-lactamase domain containing                        |
| Q9NRX1   | PNO1    | -0.359 | partner of NOB1 homolog                                              |
| P09884   | POLA1   | -0.286 | DNA polymerase alpha 1, catalytic subunit                            |
| P06746   | POLB    | 0.307  | DNA polymerase beta                                                  |
| P28340   | POLD1   | -0.163 | DNA polymerase delta 1, catalytic subunit                            |
| P49005   | POLD2   | -0.184 | DNA polymerase delta 2, accessory subunit                            |
| P52435   | POLR2J  | 0.314  | RNA polymerase II subunit J                                          |
| Q9BUI4   | POLR3C  | 0.118  | RNA polymerase III subunit C                                         |
| O95707   | POP4    | -0.112 | POP4 homolog, ribonuclease P/MRP subunit                             |
| Q9HAB8   | PPCS    | 0.151  | phosphopantothenoylcysteine synthetase                               |
| P45877   | PPIC    | 0.184  | peptidylprolyl isomerase C                                           |
| P30405   | PPIF    | 0.177  | peptidylprolyl isomerase F                                           |
| Q9H2H8-1 | PPIL3   | -0.132 | peptidylprolyl isomerase like 3                                      |
| P35813-3 | PPM1A   | 0.319  | protein phosphatase, Mg <sup>2+</sup> /Mn <sup>2+</sup> dependent 1A |
| O15297   | PPM1D   | 0.487  | protein phosphatase, Mg <sup>2+</sup> /Mn <sup>2+</sup> dependent 1D |
| Q9ULR3   | PPM1H   | -0.333 | protein phosphatase, Mg <sup>2+</sup> /Mn <sup>2+</sup> dependent 1H |
| Q96QC0   | PPP1R10 | 0.262  | protein phosphatase 1 regulatory subunit 10                          |
| Q6ZMI0-1 | PPP1R21 | -0.191 | protein phosphatase 1 regulatory subunit 21                          |
| Q12972   | PPP1R8  | 0.148  | protein phosphatase 1 regulatory subunit 8                           |
| Q9ULJ8-3 | PPP1R9A | -0.335 | protein phosphatase 1 regulatory subunit 9A                          |
| Q6IN85   | PPP4R3A | 0.152  | protein phosphatase 4 regulatory subunit 3A                          |
| O43663   | PRC1    | 0.347  | protein regulator of cytokinesis 1                                   |
| P48147   | PREP    | -0.157 | prolyl endopeptidase                                                 |
| Q4J6C6   | PREPL   | 0.266  | prolyl endopeptidase like                                            |
| P49643   | PRIM2   | -0.417 | DNA primase subunit 2                                                |
| P31321   | PRKAR1B | -0.584 | protein kinase cAMP-dependent type I regulatory subunit beta         |
| P17252   | PRKCA   | -0.378 | protein kinase C alpha                                               |
| O75569   | PRKRA   | 0.228  | protein activator of interferon induced protein kinase EIF2AK2       |

|          |           |        |                                                   |
|----------|-----------|--------|---------------------------------------------------|
| Q9H875   | PRKRIP1   | 0.266  | PRKR interacting protein 1                        |
| Q9UNN8   | PROCR     | 0.845  | protein C receptor                                |
| Q9UMS4   | PRPF19    | 0.126  | pre-mRNA processing factor 19                     |
| Q8NAV1-1 | PRPF38A   | 0.122  | pre-mRNA processing factor 38A                    |
| Q13523   | PRPF4B    | 0.165  | pre-mRNA processing factor 4B                     |
| P61289-2 | PSME3     | 0.131  | proteasome activator subunit 3                    |
| Q92530   | PSMF1     | -0.217 | proteasome inhibitor subunit 1                    |
| O95456   | PSMG1     | -0.151 | proteasome assembly chaperone 1                   |
| O95758-4 | PTBP3     | 0.176  | polypyrimidine tract binding protein 3            |
| Q9BVG9   | PTDSS2    | -0.415 | phosphatidylserine synthase 2                     |
| Q86YD1-1 | PTOV1     | -0.222 | PTOV1 extended AT-hook containing adaptor protein |
| Q05209   | PTPN12    | -0.223 | protein tyrosine phosphatase non-receptor type 12 |
| P17706-1 | PTPN2     | -0.24  | protein tyrosine phosphatase non-receptor type 2  |
| P10586-1 | PTPRF     | -0.397 | protein tyrosine phosphatase receptor type F      |
| Q15262-3 | PTPRK     | -0.531 | protein tyrosine phosphatase receptor type K      |
| Q15397   | PUM3      | -0.48  | pumilio RNA binding family member 3               |
| Q96C36   | PYCR2     | 0.248  | pyrroline-5-carboxylate reductase 2               |
| Q6WKZ4   | RAB11FIP1 | -0.174 | RAB11 family interacting protein 1                |
| P61106   | RAB14     | 0.131  | RAB14, member RAS oncogene family                 |
| Q9UL25   | RAB21     | 0.167  | RAB21, member RAS oncogene family                 |
| Q15286   | RAB35     | 0.144  | RAB35, member RAS oncogene family                 |
| O95716   | RAB3D     | -0.181 | RAB3D, member RAS oncogene family                 |
| Q9Y3P9   | RABGAP1   | -0.272 | RAB GTPase activating protein 1                   |
| P63000-2 | RAC1      | 0.18   | Rac family small GTPase 1                         |
| Q9H0H5   | RACGAP1   | 0.302  | Rac GTPase activating protein 1                   |
| P63244   | RACK1     | -0.181 | receptor for activated C kinase 1                 |
| P78406   | RAE1      | 0.15   | ribonucleic acid export 1                         |
| P11234-2 | RALB      | 0.246  | RAS like proto-oncogene B                         |
| P62826   | RAN       | 0.104  | RAN, member RAS oncogene family                   |
| Q96S59-1 | RANBP9    | 0.133  | RAN binding protein 9                             |
| P52306-5 | RAP1GDS1  | -0.203 | Rap1 GTPase-GDP dissociation stimulator 1         |
| P61225   | RAP2B     | 0.437  | RAP2B, member of RAS oncogene family              |
| Q7Z6E9   | RBBP6     | 0.438  | RB binding protein 6, ubiquitin ligase            |
| O43251-8 | RBFOX2    | -0.573 | RNA binding fox-1 homolog 2                       |
| Q8N0T1   | RBIS      | -0.77  | ribosomal biogenesis factor                       |
| Q96T37   | RBM15     | 0.156  | RNA binding motif protein 15                      |
| Q9Y4C8   | RBM19     | -0.221 | RNA binding motif protein 19                      |
| Q9NW64   | RBM22     | 0.214  | RNA binding motif protein 22                      |
| P49756-1 | RBM25     | 0.106  | RNA binding motif protein 25                      |
| Q9P2N5   | RBM27     | 0.142  | RNA binding motif protein 27                      |
| P42696   | RBM34     | -0.24  | RNA binding motif protein 34                      |
| P52756   | RBM5      | 0.193  | RNA binding motif protein 5                       |
| P09455-1 | RBP1      | -0.168 | retinol binding protein 1                         |
| Q8IZV5   | RDH10     | 0.347  | retinol dehydrogenase 10                          |
| P35241-5 | RDX       | 0.212  | radixin                                           |
| Q9H6H4   | REEP4     | 0.283  | receptor accessory protein 4                      |
| Q00765   | REEP5     | 0.236  | receptor accessory protein 5                      |

|          |         |        |                                                                      |
|----------|---------|--------|----------------------------------------------------------------------|
| P78509   | RELN    | -0.47  | reelin                                                               |
| Q6NUM9-1 | RETSAT  | 0.631  | retinol saturase                                                     |
| P35250-1 | RFC2    | -0.119 | replication factor C subunit 2                                       |
| Q969G6   | RFK     | 0.371  | riboflavin kinase                                                    |
| Q13671   | RIN1    | 0.885  | Ras and Rab interactor 1                                             |
| Q9BRS2   | RIOK1   | -0.287 | RIO kinase 1                                                         |
| Q96DB5   | RMDN1   | 0.163  | regulator of microtubule dynamics 1                                  |
| Q9Y508   | RNF114  | 0.367  | ring finger protein 114                                              |
| O75150   | RNF40   | 0.116  | ring finger protein 40                                               |
| Q9Y6N7-2 | ROBO1   | -0.477 | roundabout guidance receptor 1                                       |
| Q9H9Y2   | RPF1    | -0.524 | ribosome production factor 1 homolog                                 |
| P30050   | RPL12   | -0.179 | ribosomal protein L12                                                |
| P18621-3 | RPL17   | -0.304 | ribosomal protein L17                                                |
| P84098   | RPL19   | -0.351 | ribosomal protein L19                                                |
| P35268   | RPL22   | -0.152 | ribosomal protein L22                                                |
| P62829   | RPL23   | -0.364 | ribosomal protein L23                                                |
| P62750   | RPL23A  | -0.206 | ribosomal protein L23a                                               |
| P62888   | RPL30   | -0.246 | ribosomal protein L30                                                |
| P62899   | RPL31   | -0.168 | ribosomal protein L31                                                |
| Q9Y3U8   | RPL36   | -0.249 | ribosomal protein L36                                                |
| P46777   | RPL5    | -0.14  | ribosomal protein L5                                                 |
| Q6DKI1   | RPL7L1  | -0.376 | ribosomal protein L7 like 1                                          |
| P05388   | RPLP0   | -0.169 | ribosomal protein lateral stalk subunit P0                           |
| P46783   | RPS10   | -0.166 | ribosomal protein S10                                                |
| P62263   | RPS14   | -0.222 | ribosomal protein S14                                                |
| P08708   | RPS17   | -0.124 | ribosomal protein S17                                                |
| P39019   | RPS19   | -0.105 | ribosomal protein S19                                                |
| P15880   | RPS2    | -0.285 | ribosomal protein S2                                                 |
| P60866   | RPS20   | -0.17  | ribosomal protein S20                                                |
| P63220   | RPS21   | -0.252 | ribosomal protein S21                                                |
| P62854   | RPS26   | -0.189 | ribosomal protein S26                                                |
| P42677   | RPS27   | -0.285 | ribosomal protein S27                                                |
| P23396   | RPS3    | -0.183 | ribosomal protein S3                                                 |
| P46782   | RPS5    | -0.185 | ribosomal protein S5                                                 |
| Q15418-2 | RPS6KA1 | 0.201  | ribosomal protein S6 kinase A1                                       |
| P51812   | RPS6KA3 | -0.211 | ribosomal protein S6 kinase A3                                       |
| O75676   | RPS6KA4 | -0.239 | ribosomal protein S6 kinase A4                                       |
| Q8N122   | RPTOR   | -0.426 | regulatory associated protein of MTOR complex 1                      |
| P55042   | RRAD    | 1.701  | RRAD, Ras related glycolysis inhibitor and calcium channel regulator |
| Q7L523   | RRAGA   | 0.31   | Ras related GTP binding A                                            |
| Q92766-2 | RREB1   | -0.275 | ras responsive element binding protein 1                             |
| P23921   | RRM1    | 0.164  | ribonucleotide reductase catalytic subunit M1                        |
| P31350-2 | RRM2    | 0.44   | ribonucleotide reductase regulatory subunit M2                       |
| Q7LG56   | RRM2B   | 0.666  | ribonucleotide reductase regulatory TP53 inducible subunit M2B       |
| Q7LG56-6 | RRM2B   | 0.922  | ribonucleotide reductase regulatory TP53 inducible subunit M2B       |
| Q96EU6   | RRP36   | -0.376 | ribosomal RNA processing 36                                          |
| Q15050   | RRS1    | -0.313 | ribosome biogenesis regulator 1 homolog                              |

|                   |          |        |                                                        |
|-------------------|----------|--------|--------------------------------------------------------|
| <b>Q9UHA3</b>     | RSL24D1  | -0.317 | ribosomal L24 domain containing 1                      |
| <b>Q15404</b>     | RSU1     | -0.146 | Ras suppressor protein 1                               |
| <b>P19793</b>     | RXRA     | -0.57  | retinoid X receptor alpha                              |
| <b>P28702-3</b>   | RXRB     | -0.224 | retinoid X receptor beta                               |
| <b>P31949</b>     | S100A11  | 0.346  | S100 calcium binding protein A11                       |
| <b>Q99584</b>     | S100A13  | 0.216  | S100 calcium binding protein A13                       |
| <b>Q96FQ6</b>     | S100A16  | 0.195  | S100 calcium binding protein A16                       |
| <b>P06703</b>     | S100A6   | 0.308  | S100 calcium binding protein A6                        |
| <b>P25815</b>     | S100P    | 0.156  | S100 calcium binding protein P                         |
| <b>P35542</b>     | SAA4     | 0.741  | serum amyloid A4, constitutive                         |
| <b>O00422</b>     | SAP18    | 0.14   | Sin3A associated protein 18                            |
| <b>Q9Y6B6</b>     | SAR1B    | -0.14  | secretion associated Ras related GTPase 1B             |
| <b>P82979</b>     | SARNP    | 0.212  | SAP domain containing ribonucleoprotein                |
| <b>O00767</b>     | SCD      | -0.357 | stearoyl-CoA desaturase                                |
| <b>Q8WU76-1</b>   | SCFD2    | -0.402 | sec1 family domain containing 2                        |
| <b>P18827</b>     | SDC1     | 0.356  | syndecan 1                                             |
| <b>P34741</b>     | SDC2     | -0.521 | syndecan 2                                             |
| <b>P31431-1</b>   | SDC4     | 0.501  | syndecan 4                                             |
| <b>O00560</b>     | SDCBP    | 0.262  | syndecan binding protein                               |
| <b>Q99470</b>     | SDF2     | 0.238  | stromal cell derived factor 2                          |
| <b>P31040</b>     | SDHA     | 0.228  | succinate dehydrogenase complex flavoprotein subunit A |
| <b>Q15437</b>     | SEC23B   | -0.186 | SEC23 homolog B, coat complex II component             |
| <b>O95486</b>     | SEC24A   | -0.176 | SEC24 homolog A, COPII coat complex component          |
| <b>O94855-2</b>   | SEC24D   | -0.188 | SEC24 homolog D, COPII coat complex component          |
| <b>Q16181</b>     | SEPTIN7  | 0.123  | septin 7                                               |
| <b>Q9UHD8-1</b>   | SEPTIN9  | -0.179 | septin 9                                               |
| <b>Q8NC51-1</b>   | SERBP1   | -0.154 | SERPINE1 mRNA binding protein 1                        |
| <b>P05543</b>     | SERPINA7 | 0.511  | serpin family A member 7                               |
| <b>P30740</b>     | SERPINB1 | 0.155  | serpin family B member 1                               |
| <b>P05121</b>     | SERPINE1 | 1.153  | serpin family E member 1                               |
| <b>P58004</b>     | SESN2    | 0.594  | sestrin 2                                              |
| <b>Q15428</b>     | SF3A2    | 0.218  | splicing factor 3a subunit 2                           |
| <b>Q12874</b>     | SF3A3    | 0.184  | splicing factor 3a subunit 3                           |
| <b>Q9BWJ5</b>     | SF3B5    | 0.125  | splicing factor 3b subunit 5                           |
| <b>P31947</b>     | SFN      | 0.415  | stratifin                                              |
| <b>P51688</b>     | SGSH     | 0.176  | N-sulfoglucosamine sulfohydrolase                      |
| <b>Q9H299</b>     | SH3BGL3  | 0.238  | SH3 domain binding glutamate rich protein like 3       |
| <b>Q8NEM2</b>     | SHCBP1   | 0.63   | SHC binding and spindle associated 1                   |
| <b>AOA0B4J2A0</b> | SHPK     | -0.117 | sedoheptulokinase                                      |
| <b>Q9UP95</b>     | SLC12A4  | 0.359  | solute carrier family 12 member 4                      |
| <b>P53985</b>     | SLC16A1  | 0.153  | solute carrier family 16 member 1                      |
| <b>P43007</b>     | SLC1A4   | -0.248 | solute carrier family 1 member 4                       |
| <b>Q8WUM9</b>     | SLC20A1  | -0.253 | solute carrier family 20 member 1                      |
| <b>Q9Y619</b>     | SLC25A15 | 0.308  | solute carrier family 25 member 15                     |
| <b>O14975</b>     | SLC27A2  | -0.123 | solute carrier family 27 member 2                      |
| <b>P11166</b>     | SLC2A1   | -0.303 | solute carrier family 2 member 1                       |
| <b>P14672</b>     | SLC2A4   | -0.34  | solute carrier family 2 member 4                       |

|                 |          |        |                                                                                          |
|-----------------|----------|--------|------------------------------------------------------------------------------------------|
| <b>Q8NEW0</b>   | SLC30A7  | -0.204 | solute carrier family 30 member 7                                                        |
| <b>Q9HBR0</b>   | SLC38A10 | -0.158 | solute carrier family 38 member 10                                                       |
| <b>Q99624</b>   | SLC38A3  | -0.172 | solute carrier family 38 member 3                                                        |
| <b>Q15043</b>   | SLC39A14 | -0.393 | solute carrier family 39 member 14                                                       |
| <b>Q8WWI5</b>   | SLC44A1  | -0.266 | solute carrier family 44 member 1                                                        |
| <b>Q9BWU0</b>   | SLC4A1AP | 0.232  | solute carrier family 4 member 1 adaptor protein                                         |
| <b>P04920</b>   | SLC4A2   | -0.133 | solute carrier family 4 member 2                                                         |
| <b>Q9UPY5</b>   | SLC7A11  | -0.312 | solute carrier family 7 member 11                                                        |
| <b>Q15599</b>   | SLC9A3R2 | -0.276 | SLC9A3 regulator 2                                                                       |
| <b>Q14BN4</b>   | SLMAP    | -0.17  | sarcolemma associated protein                                                            |
| <b>Q92925</b>   | SMARCD2  | -0.257 | SWI/SNF related, matrix associated, actin dependent regulator of chromatin, subfamily d, |
| <b>Q86US8-1</b> | SMG6     | -0.47  | SMG6 nonsense mediated mRNA decay factor                                                 |
| <b>P53814-6</b> | SMTN     | 0.953  | smoothelin                                                                               |
| <b>Q2TAY7</b>   | SMU1     | 0.106  | SMU1 DNA replication regulator and spliceosomal factor                                   |
| <b>Q7KZF4</b>   | SND1     | -0.248 | staphylococcal nuclease and tudor domain containing 1                                    |
| <b>Q8WVK2</b>   | SNRNP27  | 0.364  | small nuclear ribonucleoprotein U4/U6.U5 subunit 27                                      |
| <b>Q13884</b>   | SNTB1    | -0.138 | syntrophin beta 1                                                                        |
| <b>P55769</b>   | SNU13    | -0.193 | small nuclear ribonucleoprotein 13                                                       |
| <b>Q9NRS6</b>   | SNX15    | -0.286 | sorting nexin 15                                                                         |
| <b>Q15036-1</b> | SNX17    | -0.28  | sorting nexin 17                                                                         |
| <b>Q5VWJ9</b>   | SNX30    | -0.235 | sorting nexin family member 30                                                           |
| <b>Q9Y5X2</b>   | SNX8     | -0.261 | sorting nexin 8                                                                          |
| <b>P04179</b>   | SOD2     | 0.346  | superoxide dismutase 2                                                                   |
| <b>Q92673</b>   | SORL1    | -0.495 | sortilin related receptor 1                                                              |
| <b>Q99523</b>   | SORT1    | -0.164 | sortilin 1                                                                               |
| <b>Q96R06</b>   | SPAG5    | 0.303  | sperm associated antigen 5                                                               |
| <b>O75391</b>   | SPAG7    | -0.303 | sperm associated antigen 7                                                               |
| <b>Q96EA4</b>   | SPDL1    | 0.48   | spindle apparatus coiled-coil protein 1                                                  |
| <b>P10451</b>   | SPP1     | -0.514 | secreted phosphoprotein 1                                                                |
| <b>P35270</b>   | SPR      | 0.163  | sepiapterin reductase                                                                    |
| <b>Q5W111</b>   | SPRYD7   | 0.213  | SPRY domain containing 7                                                                 |
| <b>Q9NUV7</b>   | SPTLC3   | -0.622 | serine palmitoyltransferase long chain base subunit 3                                    |
| <b>Q14534</b>   | SQLE     | -0.31  | squalene epoxidase                                                                       |
| <b>Q8NEF9</b>   | SRFBP1   | -0.212 | serum response factor binding protein 1                                                  |
| <b>O75044</b>   | SRGAP2   | -0.217 | SLIT-ROBO Rho GTPase activating protein 2                                                |
| <b>Q96SB4</b>   | SRPK1    | -0.147 | SRSF protein kinase 1                                                                    |
| <b>Q9BXP5</b>   | SRRT     | 0.23   | serrate, RNA effector molecule                                                           |
| <b>Q16629</b>   | SRSF7    | 0.199  | serine and arginine rich splicing factor 7                                               |
| <b>Q08945</b>   | SSRP1    | 0.148  | structure specific recognition protein 1                                                 |
| <b>Q9NP77</b>   | SSU72    | -0.143 | SSU72 homolog, RNA polymerase II CTD phosphatase                                         |
| <b>P15907</b>   | ST6GAL1  | -0.345 | ST6 beta-galactoside alpha-2,6-sialyltransferase 1                                       |
| <b>P42224-1</b> | STAT1    | 0.108  | signal transducer and activator of transcription 1                                       |
| <b>P40763</b>   | STAT3    | 0.433  | signal transducer and activator of transcription 3                                       |
| <b>Q9NUL3</b>   | STAU2    | -0.322 | staufen double-stranded RNA binding protein 2                                            |
| <b>Q658P3-2</b> | STEAP3   | -0.519 | STEAP3 metalloredutase                                                                   |
| <b>Q13586</b>   | STIM1    | -0.22  | stromal interaction molecule 1                                                           |
| <b>O94804</b>   | STK10    | -0.33  | serine/threonine kinase 10                                                               |

|          |           |        |                                                        |
|----------|-----------|--------|--------------------------------------------------------|
| Q13188-2 | STK3      | -0.812 | serine/threonine kinase 3                              |
| P27105   | STOM      | 0.706  | stomatin                                               |
| Q86Y82   | STX12     | 0.21   | syntaxin 12                                            |
| Q13277   | STX3      | 0.161  | syntaxin 3                                             |
| Q12846   | STX4      | 0.109  | syntaxin 4                                             |
| O43752   | STX6      | 0.437  | syntaxin 6                                             |
| O00186   | STXBP3    | 0.214  | syntaxin binding protein 3                             |
| P53999   | SUB1      | 0.374  | SUB1 regulator of transcription                        |
| O75683   | SURF6     | -0.542 | surfeit 6                                              |
| Q9UH65   | SWAP70    | 0.146  | switching B cell complex subunit SWAP70                |
| O95359   | TACC2     | -0.203 | transforming acidic coiled-coil containing protein 2   |
| Q9Y6A5   | TACC3     | 0.235  | transforming acidic coiled-coil containing protein 3   |
| P37837   | TALDO1    | 0.245  | transaldolase 1                                        |
| Q03518   | TAP1      | 0.462  | transporter 1, ATP binding cassette subfamily B member |
| Q86VP1   | TAX1BP1   | -0.25  | Tax1 binding protein 1                                 |
| O14907   | TAX1BP3   | 0.339  | Tax1 binding protein 3                                 |
| O60343-1 | TBC1D4    | -0.174 | TBC1 domain family member 4                            |
| Q92609-2 | TBC1D5    | -0.347 | TBC1 domain family member 5                            |
| Q9Y4C2-1 | TCAF1     | -0.182 | TRPM8 channel associated factor 1                      |
| Q9BQ70   | TCF25     | -0.24  | transcription factor 25                                |
| Q9NYB0   | TERF2IP   | 0.371  | TERF2 interacting protein                              |
| Q96BS2   | TESC      | -0.326 | tescalcin                                              |
| Q8IWB9-2 | TEX2      | -0.229 | testis expressed 2                                     |
| P02787   | TF        | -0.328 | transferrin                                            |
| P01137   | TGFB1     | 0.312  | transforming growth factor beta 1                      |
| P37173-2 | TGFBR2    | -0.361 | transforming growth factor beta receptor 2             |
| Q03167   | TGFBR3    | -0.276 | transforming growth factor beta receptor 3             |
| P21980   | TGM2      | -0.16  | transglutaminase 2                                     |
| Q96EK4   | THAP11    | -0.181 | THAP domain containing 11                              |
| P07996   | THBS1     | -0.351 | thrombospondin 1                                       |
| Q9NXG2   | THUMPD1   | 0.267  | THUMP domain containing 1                              |
| Q9BV44   | THUMPD3   | -0.141 | THUMP domain containing 3                              |
| Q9NQ88   | TIGAR     | 0.756  | TP53 induced glycolysis regulatory phosphatase         |
| Q9Y5J6   | TIMM10B   | 0.116  | translocase of inner mitochondrial membrane 10B        |
| Q9UDY2   | TJP2      | -0.176 | tight junction protein 2                               |
| P04183   | TK1       | 0.494  | thymidine kinase 1                                     |
| Q9Y3A6   | TMED5     | 0.257  | transmembrane p24 trafficking protein 5                |
| Q9P0S9   | TMEM14C   | 0.187  | transmembrane protein 14C                              |
| Q9HC07   | TMEM165   | 0.118  | transmembrane protein 165                              |
| Q8N511   | TMEM199   | 0.23   | transmembrane protein 199                              |
| Q9H1E5   | TMX4      | 0.304  | thioredoxin related transmembrane protein 4            |
| O00220   | TNFRSF10A | 0.294  | TNF receptor superfamily member 10a                    |
| Q68CZ2-1 | TNS3      | -0.335 | tensin 3                                               |
| Q96GM8   | TOE1      | 0.122  | target of EGR1, exonuclease                            |
| O60784   | TOM1      | -0.213 | target of myb1 membrane trafficking protein            |
| Q15785   | TOMM34    | 0.11   | translocase of outer mitochondrial membrane 34         |
| Q8N4H5   | TOMM5     | 0.21   | translocase of outer mitochondrial membrane 5          |

|          |         |        |                                                                                     |
|----------|---------|--------|-------------------------------------------------------------------------------------|
| O14656   | TOR1A   | 0.212  | torsin family 1 member A                                                            |
| O94842   | TOX4    | 0.232  | TOX high mobility group box family member 4                                         |
| P04637   | TP53    | 1.13   | tumor protein p53                                                                   |
| Q53FA7   | TP53I3  | 1.179  | tumor protein p53 inducible protein 3                                               |
| Q9ULW0   | TPX2    | 0.647  | TPX2 microtubule nucleation factor                                                  |
| Q9Y296   | TRAPPC4 | 0.16   | trafficking protein particle complex 4                                              |
| O15164   | TRIM24  | -0.198 | tripartite motif containing 24                                                      |
| Q14258   | TRIM25  | -0.195 | tripartite motif containing 25                                                      |
| Q13263   | TRIM28  | 0.202  | tripartite motif containing 28                                                      |
| Q15643   | TRIP11  | 0.153  | thyroid hormone receptor interactor 11                                              |
| Q15650   | TRIP4   | -0.405 | thyroid hormone receptor interactor 4                                               |
| Q8TEL6   | TRPC4AP | -0.233 | transient receptor potential cation channel subfamily C member 4 associated protein |
| Q9BSV6   | TSEN34  | -0.219 | tRNA splicing endonuclease subunit 34                                               |
| Q9H2G4   | TSPYL2  | 0.331  | TSPY like 2                                                                         |
| Q2NL82   | TSR1    | -0.117 | TSR1 ribosome maturation factor                                                     |
| Q16762   | TST     | 0.266  | thiosulfate sulfurtransferase                                                       |
| Q6P3X3   | TTC27   | -0.298 | tetratricopeptide repeat domain 27                                                  |
| Q13509   | TUBB3   | 0.166  | tubulin beta 3 class III                                                            |
| Q9BUF5   | TUBB6   | 0.398  | tubulin beta 6 class V                                                              |
| Q96CW5   | TUBGCP3 | -0.157 | tubulin gamma complex associated protein 3                                          |
| Q5TAX3   | TUT4    | -0.246 | terminal uridylyl transferase 4                                                     |
| Q6IBS0   | TWF2    | 0.526  | twinfilin actin binding protein 2                                                   |
| P26368   | U2AF2   | 0.136  | U2 small nuclear RNA auxiliary factor 2                                             |
| Q9BSL1   | UBAC1   | -0.335 | UBA domain containing 1                                                             |
| P62256   | UBE2H   | 0.144  | ubiquitin conjugating enzyme E2 H                                                   |
| O95155-4 | UBE4B   | -0.209 | ubiquitination factor E4B                                                           |
| O95071   | UBR5    | 0.114  | ubiquitin protein ligase E3 component n-recogin 5                                   |
| Q04323-1 | UBXN1   | -0.164 | UBX domain protein 1                                                                |
| Q9BZX2-1 | UCK2    | -0.208 | uridine-cytidine kinase 2                                                           |
| P16662   | UGT2B7  | 0.494  | UDP glucuronosyltransferase family 2 member B7                                      |
| Q96T88-2 | UHRF1   | -0.634 | ubiquitin like with PHD and ring finger domains 1                                   |
| Q70J99-3 | UNC13D  | -0.203 | unc-13 homolog D                                                                    |
| P13051   | UNG     | -0.259 | uracil DNA glycosylase                                                              |
| Q9BZ17-1 | UPF3B   | 0.196  | UPF3B regulator of nonsense mediated mRNA decay                                     |
| P51784   | USP11   | 0.227  | ubiquitin specific peptidase 11                                                     |
| Q92995   | USP13   | -0.23  | ubiquitin specific peptidase 13                                                     |
| Q8NFA0   | USP32   | -0.323 | ubiquitin specific peptidase 32                                                     |
| Q9P275-2 | USP36   | -0.11  | ubiquitin specific peptidase 36                                                     |
| Q93008   | USP9X   | -0.144 | ubiquitin specific peptidase 9 X-linked                                             |
| Q9BVJ6-1 | UTP14A  | -0.25  | UTP14A small subunit processome component                                           |
| Q9Y5J1   | UTP18   | -0.105 | UTP18 small subunit processome component                                            |
| P46939   | UTRN    | -0.259 | utrophin                                                                            |
| Q9BV40   | VAMP8   | 0.32   | vesicle associated membrane protein 8                                               |
| Q6EMK4   | VASN    | -0.329 | vasorin                                                                             |
| P50552   | VASP    | 0.126  | vasodilator stimulated phosphoprotein                                               |
| P52735   | VAV2    | -0.331 | vav guanine nucleotide exchange factor 2                                            |
| P18206   | VCL     | -0.121 | vinculin                                                                            |

|          |         |        |                                                                                   |
|----------|---------|--------|-----------------------------------------------------------------------------------|
| P21796   | VDAC1   | 0.163  | voltage dependent anion channel 1                                                 |
| P45880-1 | VDAC2   | 0.298  | voltage dependent anion channel 2                                                 |
| Q9Y277-2 | VDAC3   | 0.256  | voltage dependent anion channel 3                                                 |
| Q9H9C1-1 | VIPAS39 | -0.218 | VPS33B interacting protein, apical-basolateral polarity regulator, spe-39 homolog |
| Q69YN4   | VIRMA   | 0.168  | vir like m6A methyltransferase associated                                         |
| Q96GC9   | VMP1    | -0.139 | vacuole membrane protein 1                                                        |
| Q96JG6   | VPS50   | -0.222 | VPS50 subunit of EARP/GARPII complex                                              |
| Q9UID3-1 | VPS51   | -0.191 | VPS51 subunit of GARP complex                                                     |
| Q5VIR6-4 | VPS53   | -0.355 | VPS53 subunit of GARP complex                                                     |
| P62760   | VSNL1   | -0.24  | visinin like 1                                                                    |
| Q96AJ9   | VTI1A   | -0.273 | vesicle transport through interaction with t-SNAREs 1A                            |
| Q9Y6W5   | WASF2   | 0.115  | WASP family member 2                                                              |
| Q12768   | WASHC5  | -0.172 | WASH complex subunit 5                                                            |
| O00401   | WASL    | -0.132 | WASP like actin nucleation promoting factor                                       |
| Q9H6R7   | WDCP    | -0.21  | WD repeat and coiled coil containing                                              |
| P61964   | WDR5    | 0.167  | WD repeat domain 5                                                                |
| Q6RFH5   | WDR74   | -0.232 | WD repeat domain 74                                                               |
| O00308   | WWP2    | -0.697 | WW domain containing E3 ubiquitin protein ligase 2                                |
| Q9C0E2   | XPO4    | -0.281 | exportin 4                                                                        |
| O75191   | XYLB    | -0.18  | xylulokinase                                                                      |
| P54577   | YARS1   | -0.147 | tyrosyl-tRNA synthetase 1                                                         |
| P07947   | YES1    | 0.108  | YES proto-oncogene 1, Src family tyrosine kinase                                  |
| O15498   | YKT6    | 0.289  | YKT6 v-SNARE homolog                                                              |
| Q9H6S0   | YTHDC2  | -0.233 | YTH domain containing 2                                                           |
| Q04917   | YWHAH   | 0.124  | tyrosine 3-monooxygenase/tryptophan 5-monooxygenase activation protein eta        |
| Q8N4Q0   | ZADH2   | 0.24   | zinc binding alcohol dehydrogenase domain containing 2                            |
| Q8WU90   | ZC3H15  | -0.307 | zinc finger CCCH-type containing 15                                               |
| Q7Z2W4   | ZC3HAV1 | 0.148  | zinc finger CCCH-type containing, antiviral 1                                     |
| Q9C0B9   | ZCCHC2  | -0.371 | zinc finger CCHC-type containing 2                                                |
| Q8N5A5   | ZGPAT   | 0.193  | zinc finger CCCH-type and G-patch domain containing                               |
| Q9Y6X8   | ZHX2    | -0.367 | zinc fingers and homeoboxes 2                                                     |
| Q14202   | ZMYM3   | -0.213 | zinc finger MYM-type containing 3                                                 |
| Q5BKZ1   | ZNF326  | 0.272  | zinc finger protein 326                                                           |
| Q86UK7   | ZNF598  | -0.197 | zinc finger protein 598                                                           |
| Q9H582   | ZNF644  | -0.313 | zinc finger protein 644                                                           |
| Q9P2E3   | ZNFX1   | 0.267  | zinc finger NFX1-type containing 1                                                |
| O43149   | ZZEF1   | -0.265 | zinc finger ZZ-type and EF-hand domain containing 1                               |
| Q16637   |         | 0.342  |                                                                                   |
| Q96JG8-4 |         | -0.216 |                                                                                   |

## List of proteins deregulated in HepG2 cells after 24h exposure to AgNP 3.5 ug/mL + CDDP 10 mM

| ID       | Symbol   | Expr Log Ratio | Entrez Gene Name                                                        |
|----------|----------|----------------|-------------------------------------------------------------------------|
| Q9NQ94   | A1CF     | -0.214         | APOBEC1 complementation factor                                          |
| P01023   | A2M      | -0.4           | alpha-2-macroglobulin                                                   |
| Q86V21-1 | AACS     | -0.181         | acetoacetyl-CoA synthetase                                              |
| Q9H7C9-1 | AAMDC    | -0.387         | adipogenesis associated Mth938 domain containing                        |
| Q9Y312   | AAR2     | 0.301          | AAR2 splicing factor                                                    |
| P49588   | AARS1    | -0.2           | alanyl-tRNA synthetase 1                                                |
| Q5JT29   | AARS2    | 0.233          | alanyl-tRNA synthetase 2, mitochondrial                                 |
| Q9NRN7   | AASDHPPT | 0.161          | aminoadipate-semialdehyde dehydrogenase-phosphopantetheinyl transferase |
| Q9UDR5   | AASS     | 0.301          | aminoadipate-semialdehyde synthase                                      |
| Q9NY61   | AATF     | 0.184          | apoptosis antagonizing transcription factor                             |
| P80404   | ABAT     | 0.207          | 4-aminobutyrate aminotransferase                                        |
| O95477   | ABCA1    | -0.363         | ATP binding cassette subfamily A member 1                               |
| Q9NRK6   | ABCB10   | 0.317          | ATP binding cassette subfamily B member 10                              |
| O75027-2 | ABCB7    | 0.275          | ATP binding cassette subfamily B member 7                               |
| Q9NUT2-1 | ABCB8    | 0.19           | ATP binding cassette subfamily B member 8                               |
| P33897   | ABCD1    | 0.239          | ATP binding cassette subfamily D member 1                               |
| P28288   | ABCD3    | 0.309          | ATP binding cassette subfamily D member 3                               |
| P61221   | ABCE1    | -0.079         | ATP binding cassette subfamily E member 1                               |
| Q9NUQ8   | ABCF3    | 0.134          | ATP binding cassette subfamily F member 3                               |
| Q8NFV4   | ABHD11   | 0.172          | abhydrolase domain containing 11                                        |
| Q8N2K0-2 | ABHD12   | 0.119          | abhydrolase domain containing 12                                        |
| Q96IU4   | ABHD14B  | -0.259         | abhydrolase domain containing 14B                                       |
| Q8TB40   | ABHD4    | 1.016          | abhydrolase domain containing 4                                         |
| Q8IZP0   | ABI1     | -0.254         | abl interactor 1                                                        |
| Q9ULW3   | ABT1     | -0.113         | activator of basal transcription 1                                      |
| P09110-1 | ACAA1    | -0.118         | acetyl-CoA acyltransferase 1                                            |
| P42765   | ACAA2    | 0.309          | acetyl-CoA acyltransferase 2                                            |
| Q13085-4 | ACACA    | -0.233         | acetyl-CoA carboxylase alpha                                            |
| Q9UKU7   | ACAD8    | 0.549          | acyl-CoA dehydrogenase family member 8                                  |
| P11310-2 | ACADM    | 0.231          | acyl-CoA dehydrogenase medium chain                                     |
| P16219   | ACADS    | 0.345          | acyl-CoA dehydrogenase short chain                                      |
| P45954   | ACADSB   | 0.151          | acyl-CoA dehydrogenase short/branched chain                             |
| P49748-3 | ACADVL   | 0.363          | acyl-CoA dehydrogenase very long chain                                  |
| Q15057   | ACAP2    | -0.186         | ArfGAP with coiled-coil, ankyrin repeat and PH domains 2                |
| P24752   | ACAT1    | 0.338          | acetyl-CoA acetyltransferase 1                                          |
| Q9BWD1   | ACAT2    | -0.355         | acetyl-CoA acetyltransferase 2                                          |
| Q5T8D3-3 | ACBD5    | 0.268          | acyl-CoA binding domain containing 5                                    |
| Q9UKV3-5 | ACIN1    | 0.384          | apoptotic chromatin condensation inducer 1                              |
| P21399   | ACO1     | -0.17          | aconitase 1                                                             |
| Q99798   | ACO2     | 0.282          | aconitase 2                                                             |
| Q86TX2   | ACOT1    | 0.243          | acyl-CoA thioesterase 1                                                 |

|                 |        |        |                                                      |
|-----------------|--------|--------|------------------------------------------------------|
| <b>Q9NPJ3</b>   | ACOT13 | 0.195  | acyl-CoA thioesterase 13                             |
| <b>O00154</b>   | ACOT7  | -0.185 | acyl-CoA thioesterase 7                              |
| <b>O14734</b>   | ACOT8  | 0.378  | acyl-CoA thioesterase 8                              |
| <b>Q9Y305</b>   | ACOT9  | 0.259  | acyl-CoA thioesterase 9                              |
| <b>Q15067</b>   | ACOX1  | 0.212  | acyl-CoA oxidase 1                                   |
| <b>Q99424</b>   | ACOX2  | 0.187  | acyl-CoA oxidase 2                                   |
| <b>O15254</b>   | ACOX3  | 0.175  | acyl-CoA oxidase 3, pristanoyl                       |
| <b>P24666</b>   | ACP1   | -0.218 | acid phosphatase 1                                   |
| <b>P11117</b>   | ACP2   | 0.096  | acid phosphatase 2, lysosomal                        |
| <b>Q96CM8-2</b> | ACSF2  | 0.268  | acyl-CoA synthetase family member 2                  |
| <b>Q4G176</b>   | ACSF3  | 0.234  | acyl-CoA synthetase family member 3                  |
| <b>O60488-1</b> | ACSL4  | -0.573 | acyl-CoA synthetase long chain family member 4       |
| <b>Q9ULC5-3</b> | ACSL5  | 0.241  | acyl-CoA synthetase long chain family member 5       |
| <b>Q68CK6</b>   | ACSM2B | 0.334  | acyl-CoA synthetase medium chain family member 2B    |
| <b>Q9NUB1</b>   | ACSS1  | 0.28   | acyl-CoA synthetase short chain family member 1      |
| <b>Q9NR19-2</b> | ACSS2  | -0.257 | acyl-CoA synthetase short chain family member 2      |
| <b>Q9H6R3</b>   | ACSS3  | 0.346  | acyl-CoA synthetase short chain family member 3      |
| <b>P12814-3</b> | ACTN1  | -0.216 | actinin alpha 1                                      |
| <b>O43707</b>   | ACTN4  | -0.267 | actinin alpha 4                                      |
| <b>P61163</b>   | ACTR1A | -0.134 | actin related protein 1A                             |
| <b>P42025</b>   | ACTR1B | -0.456 | actin related protein 1B                             |
| <b>P61160-1</b> | ACTR2  | -0.106 | actin related protein 2                              |
| <b>Q03154-1</b> | ACY1   | -0.322 | aminoacylase 1                                       |
| <b>P14621</b>   | ACYP2  | -0.486 | acylphosphatase 2                                    |
| <b>O14672</b>   | ADAM10 | -0.26  | ADAM metallopeptidase domain 10                      |
| <b>Q13443</b>   | ADAM9  | -0.313 | ADAM metallopeptidase domain 9                       |
| <b>P55265-4</b> | ADAR   | 0.121  | adenosine deaminase RNA specific                     |
| <b>O60503</b>   | ADCY9  | -0.79  | adenylate cyclase 9                                  |
| <b>P35611-3</b> | ADD1   | -0.331 | adducin 1                                            |
| <b>Q9UEY8-2</b> | ADD3   | -0.318 | adducin 3                                            |
| <b>Q9Y653</b>   | ADGRG1 | 0.597  | adhesion G protein-coupled receptor G1               |
| <b>Q86SQ4-3</b> | ADGRG6 | -0.405 | adhesion G protein-coupled receptor G6               |
| <b>P08319-2</b> | ADH4   | -0.285 | alcohol dehydrogenase 4 (class II), pi polypeptide   |
| <b>P11766</b>   | ADH5   | -0.251 | alcohol dehydrogenase 5 (class III), chi polypeptide |
| <b>P28332-2</b> | ADH6   | -0.312 | alcohol dehydrogenase 6 (class V)                    |
| <b>Q9BV57</b>   | ADI1   | -0.268 | acireductone dioxygenase 1                           |
| <b>P55263</b>   | ADK    | -0.396 | adenosine kinase                                     |
| <b>Q9H2P0</b>   | ADNP   | 0.29   | activity dependent neuroprotector homeobox           |
| <b>Q9BRR6-1</b> | ADPGK  | 0.158  | ADP dependent glucokinase                            |
| <b>Q16186</b>   | ADRM1  | 0.27   | adhesion regulating molecule 1                       |
| <b>P30566</b>   | ADSL   | -0.348 | adenylosuccinate lyase                               |
| <b>P30520</b>   | ADSS2  | -0.185 | adenylosuccinate synthase 2                          |
| <b>P55196-5</b> | AFDN   | -0.121 | afadin, adherens junction formation factor           |
| <b>Q9UHB7-1</b> | AFF4   | 0.467  | AF4/FMR2 family member 4                             |
| <b>Q9Y4W6</b>   | AFG3L2 | 0.323  | AFG3 like matrix AAA peptidase subunit 2             |
| <b>P02771</b>   | AFP    | -0.343 | alpha fetoprotein                                    |
| <b>Q6ULP2</b>   | AFTPH  | -0.29  | aftiphilin                                           |

|          |               |        |                                                                 |
|----------|---------------|--------|-----------------------------------------------------------------|
| P52594-4 | AGFG1         | -0.167 | ArfGAP with FG repeats 1                                        |
| O95081   | AGFG2         | -0.275 | ArfGAP with FG repeats 2                                        |
| Q9BSE5   | AGMAT         | 0.286  | agmatinase                                                      |
| Q9NUQ2   | AGPAT5        | 0.146  | 1-acylglycerol-3-phosphate O-acyltransferase 5                  |
| O95994   | AGR2          | 0.397  | anterior gradient 2, protein disulphide isomerase family member |
| O00468   | AGRN          | -0.298 | agrin                                                           |
| P01019   | AGT           | -0.657 | angiotensinogen                                                 |
| Q8WYP5-2 | AHCTF1        | 0.382  | AT-hook containing transcription factor 1                       |
| P23526-1 | AHCY          | -0.321 | adenosylhomocysteinase                                          |
| O43865   | AHCYL1        | -0.12  | adenosylhomocysteinase like 1                                   |
| Q09666-1 | AHNAK         | -0.23  | AHNAK nucleoprotein                                             |
| P02765   | AHSG          | -0.474 | alpha 2-HS glycoprotein                                         |
| O95831-1 | AIFM1         | 0.17   | apoptosis inducing factor mitochondria associated 1             |
| Q9BRQ8   | AIFM2         | 0.132  | apoptosis inducing factor mitochondria associated 2             |
| Q96IF1   | AJUBA         | -0.117 | ajuba LIM protein                                               |
| P00568   | AK1           | -0.186 | adenylate kinase 1                                              |
| Q9UIJ7-1 | AK3           | 0.28   | adenylate kinase 3                                              |
| P27144   | AK4           | 0.198  | adenylate kinase 4                                              |
| Q92667   | AKAP1         | 0.146  | A-kinase anchoring protein 1                                    |
| Q12802-2 | AKAP13        | -0.365 | A-kinase anchoring protein 13                                   |
| Q02040-1 | AKAP17A       | 0.328  | A-kinase anchoring protein 17A                                  |
| O43823   | AKAP8         | 0.296  | A-kinase anchoring protein 8                                    |
| Q9ULX6   | AKAP8L        | 0.301  | A-kinase anchoring protein 8 like                               |
| P14550   | AKR1A1        | -0.203 | aldo-keto reductase family 1 member A1                          |
| O60218   | AKR1B10       | 0.192  | aldo-keto reductase family 1 member B10                         |
| P52895   | AKR1C1/AKR1C2 | 0.172  | aldo-keto reductase family 1 member C2                          |
| Q04828   | AKR1C1/AKR1C2 | 0.156  | aldo-keto reductase family 1 member C2                          |
| P51857   | AKR1D1        | -0.171 | aldo-keto reductase family 1 member D1                          |
| O43488   | AKR7A2        | -0.204 | aldo-keto reductase family 7 member A2                          |
| P31749   | AKT1          | -0.15  | AKT serine/threonine kinase 1                                   |
| P13716-2 | ALAD          | -0.384 | aminolevulinate dehydratase                                     |
| P13196   | ALAS1         | 0.65   | 5'-aminolevulinate synthase 1                                   |
| P02768   | ALB           | -0.497 | albumin                                                         |
| P02769   | ALB           | 1.177  | albumin                                                         |
| Q8IZ83   | ALDH16A1      | -0.229 | aldehyde dehydrogenase 16 family member A1                      |
| P00352   | ALDH1A1       | -0.388 | aldehyde dehydrogenase 1 family member A1                       |
| P30837   | ALDH1B1       | 0.318  | aldehyde dehydrogenase 1 family member B1                       |
| P05091   | ALDH2         | 0.318  | aldehyde dehydrogenase 2 family member                          |
| P51648-2 | ALDH3A2       | 0.118  | aldehyde dehydrogenase 3 family member A2                       |
| P30038   | ALDH4A1       | 0.266  | aldehyde dehydrogenase 4 family member A1                       |
| P51649-2 | ALDH5A1       | 0.352  | aldehyde dehydrogenase 5 family member A1                       |
| Q02252   | ALDH6A1       | 0.144  | aldehyde dehydrogenase 6 family member A1                       |
| P49419-2 | ALDH7A1       | 0.131  | aldehyde dehydrogenase 7 family member A1                       |
| P09972   | ALDOC         | -0.238 | aldolase, fructose-bisphosphate C                               |
| Q9H553   | ALG2          | 0.229  | ALG2 alpha-1,3/1,6-mannosyltransferase                          |
| Q9Y673   | ALG5          | 0.334  | ALG5 dolichyl-phosphate beta-glucosyltransferase                |
| Q9H6U8-3 | ALG9          | 0.243  | ALG9 alpha-1,2-mannosyltransferase                              |

|          |                        |        |                                                             |
|----------|------------------------|--------|-------------------------------------------------------------|
| Q9BT30   | ALKBH7                 | -0.354 | alkB homolog 7                                              |
| Q86V81   | ALYREF                 | 0.178  | Aly/REF export factor                                       |
| Q9UHK6-5 | AMACR                  | 0.283  | alpha-methylacyl-CoA racemase                               |
| Q9Y2J4-4 | AMOTL2                 | 0.682  | angiomin like 2                                             |
| Q01433-1 | AMPD2                  | -0.268 | adenosine monophosphate deaminase 2                         |
| P48728   | AMT                    | 0.298  | aminomethyltransferase                                      |
| Q9H1A4   | ANAPC1                 | -0.161 | anaphase promoting complex subunit 1                        |
| Q9UJX6   | ANAPC2                 | -0.201 | anaphase promoting complex subunit 2                        |
| Q9P2R3-4 | ANKFY1                 | -0.254 | ankyrin repeat and FYVE domain containing 1                 |
| Q8IWZ3-6 | ANKHD1/ANKHD1-EIF4EBP3 | -0.205 | ankyrin repeat and KH domain containing 1                   |
| Q15327   | ANKRD1                 | 0.826  | ankyrin repeat domain 1                                     |
| O75179   | ANKRD17                | -0.114 | ankyrin repeat domain 17                                    |
| Q8NB46   | ANKRD52                | -0.493 | ankyrin repeat domain 52                                    |
| Q92625   | ANKS1A                 | -0.239 | ankyrin repeat and sterile alpha motif domain containing 1A |
| Q9NQW6   | ANLN                   | 0.411  | anillin actin binding protein                               |
| P39687   | ANP32A                 | -0.178 | acidic nuclear phosphoprotein 32 family member A            |
| Q92688   | ANP32B                 | -0.307 | acidic nuclear phosphoprotein 32 family member B            |
| Q9BTT0   | ANP32E                 | -0.162 | acidic nuclear phosphoprotein 32 family member E            |
| P15144   | ANPEP                  | -0.124 | alanyl aminopeptidase, membrane                             |
| P50995   | ANXA11                 | -0.17  | annexin A11                                                 |
| P09525   | ANXA4                  | -0.216 | annexin A4                                                  |
| P08758   | ANXA5                  | -0.194 | annexin A5                                                  |
| P08133   | ANXA6                  | -0.344 | annexin A6                                                  |
| P20073   | ANXA7                  | -0.167 | annexin A7                                                  |
| Q10567   | AP1B1                  | -0.129 | adaptor related protein complex 1 subunit beta 1            |
| O43747   | AP1G1                  | -0.317 | adaptor related protein complex 1 subunit gamma 1           |
| Q9BXS5-1 | AP1M1                  | -0.079 | adaptor related protein complex 1 subunit mu 1              |
| P61966   | AP1S1                  | -0.167 | adaptor related protein complex 1 subunit sigma 1           |
| O94973-2 | AP2A2                  | -0.135 | adaptor related protein complex 2 subunit alpha 2           |
| P63010-2 | AP2B1                  | -0.256 | adaptor related protein complex 2 subunit beta 1            |
| Q96CW1   | AP2M1                  | 0.111  | adaptor related protein complex 2 subunit mu 1              |
| O00203   | AP3B1                  | -0.161 | adaptor related protein complex 3 subunit beta 1            |
| O14617-5 | AP3D1                  | -0.282 | adaptor related protein complex 3 subunit delta 1           |
| P13798   | APEH                   | -0.329 | acylaminoacyl-peptide hydrolase                             |
| P27695   | APEX1                  | -0.231 | apurinic/apurimidinic endodeoxyribonuclease 1               |
| Q96GX9-1 | APIP                   | -0.23  | APAF1 interacting protein                                   |
| Q06481   | APLP2                  | -0.208 | amyloid beta precursor like protein 2                       |
| Q9HDC9   | APMAP                  | 0.229  | adipocyte plasma membrane associated protein                |
| P02647   | APOA1                  | -0.697 | apolipoprotein A1                                           |
| P02652   | APOA2                  | -0.337 | apolipoprotein A2                                           |
| P04114   | APOB                   | -0.946 | apolipoprotein B                                            |
| Q9UH17   | APOBEC3B               | 0.479  | apolipoprotein B mRNA editing enzyme catalytic subunit 3B   |
| Q9NRW3   | APOBEC3C               | 0.535  | apolipoprotein B mRNA editing enzyme catalytic subunit 3C   |
| P02655   | APOC2                  | -0.619 | apolipoprotein C2                                           |
| P02649   | APOE                   | -0.35  | apolipoprotein E                                            |
| O14791-2 | APOL1                  | -0.572 | apolipoprotein L1                                           |
| Q9BUR5-1 | APOO                   | 0.193  | apolipoprotein O                                            |

|                 |                   |        |                                                              |
|-----------------|-------------------|--------|--------------------------------------------------------------|
| <b>Q6UXV4</b>   | APOOL             | 0.296  | apolipoprotein O like                                        |
| <b>P05067</b>   | APP               | -0.7   | amyloid beta precursor protein                               |
| <b>P07741</b>   | APRT              | -0.276 | adenine phosphoribosyltransferase                            |
| <b>Q7Z2E3-1</b> | APTX              | 0.171  | aprataxin                                                    |
| <b>O60306</b>   | AQR               | 0.215  | aquarius intron-binding spliceosomal factor                  |
| <b>Q96P48-6</b> | ARAP1             | -0.228 | ArfGAP with RhoGAP domain, ankyrin repeat and PH domain 1    |
| <b>P48444</b>   | ARCN1             | -0.116 | archain 1                                                    |
| <b>P18085</b>   | ARF4              | -0.134 | ADP ribosylation factor 4                                    |
| <b>Q8N6T3-1</b> | ARFGAP1           | -0.151 | ADP ribosylation factor GTPase activating protein 1          |
| <b>Q8N6H7</b>   | ARFGAP2           | -0.117 | ADP ribosylation factor GTPase activating protein 2          |
| <b>Q9NP61</b>   | ARFGAP3           | -0.216 | ADP ribosylation factor GTPase activating protein 3          |
| <b>Q9Y6D6</b>   | ARFGEF1           | -0.107 | ADP ribosylation factor guanine nucleotide exchange factor 1 |
| <b>Q9Y6D5</b>   | ARFGEF2           | -0.245 | ADP ribosylation factor guanine nucleotide exchange factor 2 |
| <b>P53365</b>   | ARFIP2            | -0.216 | ADP ribosylation factor interacting protein 2                |
| <b>P78540</b>   | ARG2              | 0.3    | arginase 2                                                   |
| <b>Q07960</b>   | ARHGAP1           | -0.172 | Rho GTPase activating protein 1                              |
| <b>Q8IWW6-1</b> | ARHGAP12          | -0.174 | Rho GTPase activating protein 12                             |
| <b>Q68EM7</b>   | ARHGAP17          | -0.186 | Rho GTPase activating protein 17                             |
| <b>Q8N392</b>   | ARHGAP18          | -0.486 | Rho GTPase activating protein 18                             |
| <b>Q9NRY4</b>   | ARHGAP35          | -0.284 | Rho GTPase activating protein 35                             |
| <b>P52565</b>   | ARHGDI1           | -0.209 | Rho GDP dissociation inhibitor alpha                         |
| <b>Q92888-3</b> | ARHGEF1           | -0.156 | Rho guanine nucleotide exchange factor 1                     |
| <b>Q9HCE6</b>   | ARHGEF10L         | -0.296 | Rho guanine nucleotide exchange factor 10 like               |
| <b>Q9NZN5</b>   | ARHGEF12          | -0.401 | Rho guanine nucleotide exchange factor 12                    |
| <b>Q5VV41</b>   | ARHGEF16          | -0.126 | Rho guanine nucleotide exchange factor 16                    |
| <b>Q92974</b>   | ARHGEF2           | 0.378  | Rho/Rac guanine nucleotide exchange factor 2                 |
| <b>Q8N1W1-6</b> | ARHGEF28          | -0.179 | Rho guanine nucleotide exchange factor 28                    |
| <b>Q14155-5</b> | ARHGEF7           | -0.277 | Rho guanine nucleotide exchange factor 7                     |
| <b>Q8NFD5-3</b> | ARID1B            | -0.18  | AT-rich interaction domain 1B                                |
| <b>Q99856</b>   | ARID3A            | -0.21  | AT-rich interaction domain 3A                                |
| <b>Q8IVW6</b>   | ARID3B            | 0.186  | AT-rich interaction domain 3B                                |
| <b>Q9Y4X5</b>   | ARIH1             | 0.141  | ariadne RBR E3 ubiquitin protein ligase 1                    |
| <b>P40616</b>   | ARL1              | -0.09  | ADP ribosylation factor like GTPase 1                        |
| <b>P36405</b>   | ARL3              | -0.177 | ADP ribosylation factor like GTPase 3                        |
| <b>Q15041</b>   | ARL6IP1           | 0.391  | ADP ribosylation factor like GTPase 6 interacting protein 1  |
| <b>Q96C12</b>   | ARMC5             | 0.61   | armadillo repeat containing 5                                |
| <b>Q6NXE6-1</b> | ARMC6             | -0.433 | armadillo repeat containing 6                                |
| <b>Q9UH62</b>   | ARMCX3            | 0.115  | armadillo repeat containing X-linked 3                       |
| <b>Q5T2E6</b>   | ARMH3             | -0.343 | armadillo like helical domain containing 3                   |
| <b>Q9H993</b>   | ARMT1             | -0.343 | acidic residue methyltransferase 1                           |
| <b>O15143</b>   | ARPC1B            | -0.178 | actin related protein 2/3 complex subunit 1B                 |
| <b>O15144</b>   | ARPC2             | -0.15  | actin related protein 2/3 complex subunit 2                  |
| <b>O15145</b>   | ARPC3             | -0.339 | actin related protein 2/3 complex subunit 3                  |
| <b>P59998-3</b> | ARPC4             | -0.093 | actin related protein 2/3 complex subunit 4                  |
| <b>O15511</b>   | ARPC5             | -0.179 | actin related protein 2/3 complex subunit 5                  |
| <b>Q7Z6K5</b>   | ARPIN/ARPIN-AP3S2 | -0.394 | ARPIN-AP3S2 readthrough                                      |
| <b>P56211</b>   | ARPP19            | -0.228 | cAMP regulated phosphoprotein 19                             |

|          |         |        |                                                                                    |
|----------|---------|--------|------------------------------------------------------------------------------------|
| P49407   | ARRB1   | -0.312 | arrestin beta 1                                                                    |
| P49407-2 | ARRB1   | -0.179 | arrestin beta 1                                                                    |
| P15848   | ARSB    | -0.322 | arylsulfatase B                                                                    |
| P51690   | ARSL    | -0.721 | arylsulfatase L                                                                    |
| O00192   | ARVCF   | 0.256  | ARVCF delta catenin family member                                                  |
| Q8TDY4-1 | ASAP3   | -0.419 | ArfGAP with SH3 domain, ankyrin repeat and PH domain 3                             |
| Q8N9N2-2 | ASCC1   | -0.452 | activating signal cointegrator 1 complex subunit 1                                 |
| Q9H1I8-1 | ASCC2   | -0.155 | activating signal cointegrator 1 complex subunit 2                                 |
| Q8N3C0   | ASCC3   | -0.355 | activating signal cointegrator 1 complex subunit 3                                 |
| Q9NVP2   | ASF1B   | 0.443  | anti-silencing function 1B histone chaperone                                       |
| P07306   | ASGR1   | -0.279 | asialoglycoprotein receptor 1                                                      |
| P07307   | ASGR2   | -0.329 | asialoglycoprotein receptor 2                                                      |
| P04424   | ASL     | -0.173 | argininosuccinate lyase                                                            |
| O95671   | ASMTL   | -0.158 | acetylserotonin O-methyltransferase like                                           |
| P08243   | ASNS    | 0.183  | asparagine synthetase (glutamine-hydrolyzing)                                      |
| Q9NWL6   | ASNSD1  | -0.121 | asparagine synthetase domain containing 1                                          |
| Q12797   | ASPH    | 0.322  | aspartate beta-hydroxylase                                                         |
| Q9BZE9-2 | ASPSR1  | -0.208 | ASPSR1 tether for SLC2A4, UBX domain containing                                    |
| Q7L266   | ASRGL1  | -0.225 | asparaginase and isoaspartyl peptidase 1                                           |
| P00966   | ASS1    | -0.428 | argininosuccinate synthase 1                                                       |
| Q8NBU5   | ATAD1   | 0.441  | ATPase family AAA domain containing 1                                              |
| Q6PL18-1 | ATAD2   | 0.117  | ATPase family AAA domain containing 2                                              |
| Q9NVI7-2 | ATAD3A  | 0.257  | ATPase family AAA domain containing 3A                                             |
| Q5T9A4   | ATAD3B  | 0.237  | ATPase family AAA domain containing 3B                                             |
| Q55QI0-1 | ATAT1   | 0.427  | alpha tubulin acetyltransferase 1                                                  |
| P15336-1 | ATF2    | -0.406 | activating transcription factor 2                                                  |
| P18847   | ATF3    | 2.039  | activating transcription factor 3                                                  |
| Q9BSB4   | ATG101  | 0.638  | autophagy related 101                                                              |
| Q676U5   | ATG16L1 | -0.12  | autophagy related 16 like 1                                                        |
| Q9Y4P1-2 | ATG4B   | -0.115 | autophagy related 4B cysteine peptidase                                            |
| O95352   | ATG7    | -0.295 | autophagy related 7                                                                |
| P31939   | ATIC    | -0.276 | 5-aminoimidazole-4-carboxamide ribonucleotide formyltransferase/IMP cyclohydrolase |
| O00244   | ATOX1   | -0.469 | antioxidant 1 copper chaperone                                                     |
| P98196   | ATP11A  | -0.2   | ATPase phospholipid transporting 11A                                               |
| P05023   | ATP1A1  | 0.123  | ATPase Na <sup>+</sup> /K <sup>+</sup> transporting subunit alpha 1                |
| P05026   | ATP1B1  | 0.331  | ATPase Na <sup>+</sup> /K <sup>+</sup> transporting subunit beta 1                 |
| P54709   | ATP1B3  | 0.472  | ATPase Na <sup>+</sup> /K <sup>+</sup> transporting subunit beta 3                 |
| P16615   | ATP2A2  | 0.156  | ATPase sarcoplasmic/endoplasmic reticulum Ca <sup>2+</sup> transporting 2          |
| P20020   | ATP2B1  | 0.122  | ATPase plasma membrane Ca <sup>2+</sup> transporting 1                             |
| P25705-1 | ATP5F1A | 0.348  | ATP synthase F1 subunit alpha                                                      |
| P06576   | ATP5F1B | 0.231  | ATP synthase F1 subunit beta                                                       |
| P56381   | ATP5F1E | 0.455  | ATP synthase F1 subunit epsilon                                                    |
| Q9UII2   | ATP5IF1 | 0.207  | ATP synthase inhibitory factor subunit 1                                           |
| P56385   | ATP5ME  | 0.162  | ATP synthase membrane subunit e                                                    |
| O75964   | ATP5MG  | 0.3    | ATP synthase membrane subunit g                                                    |
| P24539   | ATP5PB  | 0.538  | ATP synthase peripheral stalk-membrane subunit b                                   |
| O75947-1 | ATP5PD  | 0.183  | ATP synthase peripheral stalk subunit d                                            |

|          |          |        |                                                                  |
|----------|----------|--------|------------------------------------------------------------------|
| P18859-2 | ATP5PF   | 0.232  | ATP synthase peripheral stalk subunit F6                         |
| P48047   | ATP5PO   | 0.48   | ATP synthase peripheral stalk subunit OSCP                       |
| O75787   | ATP6AP2  | 0.26   | ATPase H+ transporting accessory protein 2                       |
| P61421   | ATP6VOD1 | 0.391  | ATPase H+ transporting V0 subunit d1                             |
| P38606   | ATP6V1A  | -0.106 | ATPase H+ transporting V1 subunit A                              |
| P21283   | ATP6V1C1 | 0.115  | ATPase H+ transporting V1 subunit C1                             |
| Q9Y5K8   | ATP6V1D  | 0.23   | ATPase H+ transporting V1 subunit D                              |
| Q5TC12   | ATPAF1   | 0.358  | ATP synthase mitochondrial F1 complex assembly factor 1          |
| Q8N5M1   | ATPAF2   | 0.262  | ATP synthase mitochondrial F1 complex assembly factor 2          |
| O75882   | ATRN     | -0.447 | attractin                                                        |
| Q9UBB4   | ATXN10   | -0.188 | ataxin 10                                                        |
| Q8WWM7-1 | ATXN2L   | -0.114 | ataxin 2 like                                                    |
| P54252   | ATXN3    | 0.48   | ataxin 3                                                         |
| Q9Y679-1 | AUP1     | 0.236  | AUP1 lipid droplet regulating VLDL assembly factor               |
| O14965   | AURKA    | 0.269  | aurora kinase A                                                  |
| Q96GD4-5 | AURKB    | 0.58   | aurora kinase B                                                  |
| Q9NQS1   | AVEN     | -0.193 | apoptosis and caspase activation inhibitor                       |
| Q8NBF6-1 | AVL9     | -0.237 | AVL9 cell migration associated                                   |
| O15169   | AXIN1    | -0.326 | axin 1                                                           |
| O94766   | B3GAT3   | 0.201  | beta-1,3-glucuronyltransferase 3                                 |
| Q9NY97   | B3GNT2   | 0.249  | UDP-GlcNAc:betaGal beta-1,3-N-acetylglucosaminyltransferase 2    |
| O60513   | B4GALT4  | -0.251 | beta-1,4-galactosyltransferase 4                                 |
| O43505   | B4GAT1   | -0.346 | beta-1,4-glucuronyltransferase 1                                 |
| Q9NWW8   | BABAM1   | -0.22  | BRISC and BRCA1 A complex member 1                               |
| Q9NXR7-1 | BABAM2   | -0.326 | BRISC and BRCA1 A complex member 2                               |
| O95816   | BAG2     | 0.329  | BCL2 associated athanogene 2                                     |
| O95817   | BAG3     | 0.791  | BCL2 associated athanogene 3                                     |
| O95429   | BAG4     | -0.346 | BCL2 associated athanogene 4                                     |
| P46379-3 | BAG6     | -0.096 | BCL2 associated athanogene 6                                     |
| O75531   | BANF1    | 0.142  | barrier to autointegration factor 1                              |
| Q07812-2 | BAX      | -0.088 | BCL2 associated X, apoptosis regulator                           |
| Q9NRL2   | BAZ1A    | 0.459  | bromodomain adjacent to zinc finger domain 1A                    |
| Q9UIG0   | BAZ1B    | 0.426  | bromodomain adjacent to zinc finger domain 1B                    |
| Q9UIF9   | BAZ2A    | 0.232  | bromodomain adjacent to zinc finger domain 2A                    |
| Q9BXH1   | BBC3     | 0.308  | BCL2 binding component 3                                         |
| P50895   | BCAM     | -0.35  | basal cell adhesion molecule (Lutheran blood group)              |
| P51572-2 | BCAP31   | 0.417  | B cell receptor associated protein 31                            |
| P56945-6 | BCAR1    | 0.233  | BCAR1 scaffold protein, Cas family member                        |
| O75934   | BCAS2    | 0.167  | BCAS2 pre-mRNA processing factor                                 |
| P54687-5 | BCAT1    | -0.345 | branched chain amino acid transaminase 1                         |
| Q9P287-2 | BCCIP    | 0.285  | BRCA2 and CDKN1A interacting protein                             |
| P12694   | BCKDHA   | 0.371  | branched chain keto acid dehydrogenase E1 subunit alpha          |
| O14874   | BCKDK    | 0.306  | branched chain keto acid dehydrogenase kinase                    |
| O95999   | BCL10    | -0.199 | BCL10 immune signaling adaptor                                   |
| Q86UU0   | BCL9L    | 0.191  | BCL9 like                                                        |
| Q9Y276   | BCS1L    | 0.337  | BCS1 homolog, ubiquinol-cytochrome c reductase complex chaperone |
| Q9BUT1   | BDH2     | -0.237 | 3-hydroxybutyrate dehydrogenase 2                                |

|          |          |        |                                                        |
|----------|----------|--------|--------------------------------------------------------|
| Q5T5X7   | BEND3    | 0.129  | BEN domain containing 3                                |
| O15155   | BET1     | 0.331  | Bet1 golgi vesicular membrane trafficking protein      |
| Q9NYM9   | BET1L    | -0.395 | Bet1 golgi vesicular membrane trafficking protein like |
| O15392-2 | BIRC5    | 0.112  | baculoviral IAP repeat containing 5                    |
| Q9NR09   | BIRC6    | -0.354 | baculoviral IAP repeat containing 6                    |
| Q13867   | BLMH     | -0.193 | bleomycin hydrolase                                    |
| P78537   | BLOC1S1  | -0.227 | biogenesis of lysosomal organelles complex 1 subunit 1 |
| P53004   | BLVRA    | -0.174 | biliverdin reductase A                                 |
| Q14692   | BMS1     | -0.26  | BMS1 ribosome biogenesis factor                        |
| Q12983   | BNIP3    | 0.6    | BCL2 interacting protein 3                             |
| Q53S33   | BOLA3    | 0.283  | bolA family member 3                                   |
| Q96GS4   | BORCS6   | -0.413 | BLOC-1 related complex subunit 6                       |
| Q86WA6   | BPHL     | 0.385  | biphenyl hydrolase like                                |
| O95861-1 | BPNT1    | -0.549 | 3'(2'), 5'-bisphosphate nucleotidase 1                 |
| O95861-2 | BPNT1    | -0.333 | 3'(2'), 5'-bisphosphate nucleotidase 1                 |
| Q7Z569   | BRAP     | 0.117  | BRCA1 associated protein                               |
| P46736   | BRCC3    | -0.213 | BRCA1/BRCA2-containing complex subunit 3               |
| O95696-2 | BRD1     | 0.201  | bromodomain containing 1                               |
| P25440-2 | BRD2     | 0.356  | bromodomain containing 2                               |
| Q15059   | BRD3     | -0.315 | bromodomain containing 3                               |
| Q5VW32   | BROX     | -0.307 | BRO1 domain and CAAX motif containing                  |
| P55201-2 | BRPF1    | 0.304  | bromodomain and PHD finger containing 1                |
| Q96K17   | BTF3L4   | -0.249 | basic transcription factor 3 like 4                    |
| Q7KYR7   | BTN2A1   | 0.693  | butyrophilin subfamily 2 member A1                     |
| O43683   | BUB1     | 0.247  | BUB1 mitotic checkpoint serine/threonine kinase        |
| O43684   | BUB3     | 0.178  | BUB3 mitotic checkpoint protein                        |
| P41223-2 | BUD31    | 0.403  | BUD31 homolog                                          |
| Q9Y6E2   | BZW2     | -0.361 | basic leucine zipper and W2 domains 2                  |
| Q9H0W9   | C11orf54 | -0.221 | chromosome 11 open reading frame 54                    |
| O00193   | C11orf58 | -0.373 | chromosome 11 open reading frame 58                    |
| E9PRG8   | C11orf98 | -0.564 | chromosome 11 open reading frame 98                    |
| Q9HB07   | C12orf10 | -0.152 | chromosome 12 open reading frame 10                    |
| Q8N5I9   | C12orf45 | 0.333  | chromosome 12 open reading frame 45                    |
| Q4G0I0   | C16orf91 | 0.31   | chromosome 16 open reading frame 91                    |
| Q9HAS0   | C17orf75 | -0.261 | chromosome 17 open reading frame 75                    |
| Q9UNZ5   | C19orf53 | 0.566  | chromosome 19 open reading frame 53                    |
| Q6ZSJ8   | C1orf122 | 0.091  | chromosome 1 open reading frame 122                    |
| Q8NDD1   | C1orf131 | -0.334 | chromosome 1 open reading frame 131                    |
| Q8N6N3   | C1orf52  | -0.367 | chromosome 1 open reading frame 52                     |
| Q9GZN8-2 | C20orf27 | -0.149 | chromosome 20 open reading frame 27                    |
| A6NCS6   | C2orf72  | -0.175 | chromosome 2 open reading frame 72                     |
| P01024   | C3       | -0.468 | complement C3                                          |
| P01031   | C5       | -0.298 | complement C5                                          |
| Q8NC54   | C5orf15  | -0.235 | chromosome 5 open reading frame 15                     |
| A6NDU8   | C5orf51  | -0.419 | chromosome 5 open reading frame 51                     |
| Q9BRJ6   | C7orf50  | -0.545 | chromosome 7 open reading frame 50                     |
| Q8IXQ3   | C9orf40  | -0.347 | chromosome 9 open reading frame 40                     |

|           |             |        |                                                                                  |
|-----------|-------------|--------|----------------------------------------------------------------------------------|
| Q5T6V5    | C9orf64     | -0.315 | chromosome 9 open reading frame 64                                               |
| Q9H8G2-1  | CAAP1       | -0.359 | caspase activity and apoptosis inhibitor 1                                       |
| Q9Y376    | CAB39       | -0.432 | calcium binding protein 39                                                       |
| Q8WUQ7-2  | CACTIN      | -0.111 | cactin, spliceosome C complex subunit                                            |
| Q9HB71    | CACYBP      | 0.112  | calcyclin binding protein                                                        |
| P27708    | CAD         | -0.158 | carbamoyl-phosphate synthetase 2, aspartate transcarbamylase, and dihydroorotase |
| Q9BY67-3  | CADM1       | -0.243 | cell adhesion molecule 1                                                         |
| Q13137-4  | CALCOCO2    | -0.22  | calcium binding and coiled-coil domain 2                                         |
| O43852-3  | CALU        | -0.148 | calumenin                                                                        |
| O43852-4  | CALU        | -0.315 | calumenin                                                                        |
| Q14012    | CAMK1       | -0.388 | calcium/calmodulin dependent protein kinase I                                    |
| Q13557-10 | CAMK2D      | -0.205 | calcium/calmodulin dependent protein kinase II delta                             |
| Q86VP6-1  | CAND1       | -0.256 | cullin associated and neddylation dissociated 1                                  |
| P27824-2  | CANX        | 0.094  | calnexin                                                                         |
| P40123    | CAP2        | -0.192 | cyclase associated actin cytoskeleton regulatory protein 2                       |
| P40121    | CAPG        | -0.228 | capping actin protein, gelsolin like                                             |
| P07384    | CAPN1       | -0.172 | calpain 1                                                                        |
| P04632    | CAPNS1      | -0.21  | calpain small subunit 1                                                          |
| Q14444    | CAPRIN1     | -0.215 | cell cycle associated protein 1                                                  |
| P52907    | CAPZA1      | -0.292 | capping actin protein of muscle Z-line subunit alpha 1                           |
| P47755    | CAPZA2      | -0.288 | capping actin protein of muscle Z-line subunit alpha 2                           |
| P47756-2  | CAPZB       | -0.202 | capping actin protein of muscle Z-line subunit beta                              |
| Q96LW7-2  | CARD19      | 0.436  | caspase recruitment domain family member 19                                      |
| Q9Y2V2    | CARHSP1     | -0.092 | calcium regulated heat stable protein 1                                          |
| Q86X55    | CARM1       | -0.091 | coactivator associated arginine methyltransferase 1                              |
| P49589-3  | CARS1       | -0.282 | cysteinyl-tRNA synthetase 1                                                      |
| Q9HA77    | CARS2       | 0.235  | cysteinyl-tRNA synthetase 2, mitochondrial                                       |
| O15234    | CASC3       | -0.231 | CASC3 exon junction complex subunit                                              |
| O14936    | CASK        | 0.135  | calcium/calmodulin dependent serine protein kinase                               |
| P49662    | CASP4       | 0.301  | caspase 4                                                                        |
| P55212    | CASP6       | -0.094 | caspase 6                                                                        |
| Q14790-9  | CASP8       | -0.106 | caspase 8                                                                        |
| P20810-6  | CAST        | -0.269 | calpastatin                                                                      |
| A6NHX0    | CASTOR2     | -0.501 | cytosolic arginine sensor for mTORC1 subunit 2                                   |
| O95810    | CAVIN2      | 0.145  | caveolae associated protein 2                                                    |
| P22681    | CBL         | -0.214 | Cbl proto-oncogene                                                               |
| P16152    | CBR1        | -0.155 | carbonyl reductase 1                                                             |
| Q8N4T8    | CBR4        | 0.22   | carbonyl reductase 4                                                             |
| P35520-2  | CBS/CBSL    | -0.386 | cystathionine beta-synthase                                                      |
| Q5JTY5    | CBWD3/CBWD6 | -0.157 | COBW domain containing 3                                                         |
| O00257    | CBX4        | 0.2    | chromobox 4                                                                      |
| P45973    | CBX5        | 0.197  | chromobox 5                                                                      |
| Q9HC52    | CBX8        | 0.433  | chromobox 8                                                                      |
| Q8IWD4    | CCDC117     | 0.52   | coiled-coil domain containing 117                                                |
| Q8WUD4    | CCDC12      | -0.293 | coiled-coil domain containing 12                                                 |
| Q96CT7    | CCDC124     | -0.12  | coiled-coil domain containing 124                                                |
| Q96BQ5    | CCDC127     | 0.627  | coiled-coil domain containing 127                                                |

|                 |            |        |                                                        |
|-----------------|------------|--------|--------------------------------------------------------|
| <b>Q9H6E4</b>   | CCDC134    | 0.206  | coiled-coil domain containing 134                      |
| <b>Q6PK04</b>   | CCDC137    | -0.36  | coiled-coil domain containing 137                      |
| <b>O60826</b>   | CCDC22     | -0.262 | coiled-coil domain containing 22                       |
| <b>Q96MW1</b>   | CCDC43     | -0.4   | coiled-coil domain containing 43                       |
| <b>Q96A33</b>   | CCDC47     | 0.279  | coiled-coil domain containing 47                       |
| <b>Q8IVM0</b>   | CCDC50     | -0.328 | coiled-coil domain containing 50                       |
| <b>Q8IVM0-2</b> | CCDC50     | -0.305 | coiled-coil domain containing 50                       |
| <b>Q96ER9</b>   | CCDC51     | 0.162  | coiled-coil domain containing 51                       |
| <b>Q16204</b>   | CCDC6      | -0.332 | coiled-coil domain containing 6                        |
| <b>A6NKD9</b>   | CCDC85C    | -0.398 | coiled-coil domain containing 85C                      |
| <b>Q3V6T2-1</b> | CCDC88A    | -0.189 | coiled-coil domain containing 88A                      |
| <b>Q9P219</b>   | CCDC88C    | -0.632 | coiled-coil domain containing 88C                      |
| <b>P20248</b>   | CCNA2      | 0.218  | cyclin A2                                              |
| <b>O95067</b>   | CCNB2      | 0.359  | cyclin B2                                              |
| <b>P51946</b>   | CCNH       | 0.34   | cyclin H                                               |
| <b>O60563</b>   | CCNT1      | 0.668  | cyclin T1                                              |
| <b>O14618</b>   | CCS        | -0.267 | copper chaperone for superoxide dismutase              |
| <b>P49368-1</b> | CCT3       | -0.104 | chaperonin containing TCP1 subunit 3                   |
| <b>P50991</b>   | CCT4       | -0.193 | chaperonin containing TCP1 subunit 4                   |
| <b>P48643</b>   | CCT5       | -0.142 | chaperonin containing TCP1 subunit 5                   |
| <b>Q99832</b>   | CCT7       | -0.132 | chaperonin containing TCP1 subunit 7                   |
| <b>P50990</b>   | CCT8       | -0.188 | chaperonin containing TCP1 subunit 8                   |
| <b>Q6YHK3</b>   | CD109      | 0.316  | CD109 molecule                                         |
| <b>Q9Y5K6</b>   | CD2AP      | -0.31  | CD2 associated protein                                 |
| <b>Q13042</b>   | CDC16      | -0.254 | cell division cycle 16                                 |
| <b>Q12834</b>   | CDC20      | 0.211  | cell division cycle 20                                 |
| <b>P49427</b>   | CDC34      | 0.29   | cell division cycle 34                                 |
| <b>Q99459</b>   | CDC5L      | 0.168  | cell division cycle 5 like                             |
| <b>Q6P1J9</b>   | CDC73      | 0.105  | cell division cycle 73                                 |
| <b>Q69YH5-1</b> | CDCA2      | 0.409  | cell division cycle associated 2                       |
| <b>Q96FF9</b>   | CDCA5      | 0.532  | cell division cycle associated 5                       |
| <b>Q53HL2</b>   | CDCA8      | 0.215  | cell division cycle associated 8                       |
| <b>P19022</b>   | CDH2       | -0.233 | cadherin 2                                             |
| <b>O14735</b>   | CDIPT      | -0.975 | CDP-diacylglycerol--inositol 3-phosphatidyltransferase |
| <b>P50750-2</b> | CDK9       | 0.408  | cyclin dependent kinase 9                              |
| <b>Q5VV42</b>   | CDKAL1     | -0.205 | CDK5 regulatory subunit associated protein 1 like 1    |
| <b>P38936</b>   | CDKN1A     | 1.182  | cyclin dependent kinase inhibitor 1A                   |
| <b>Q9NXV6</b>   | CDKN2AIP   | 0.338  | CDKN2A interacting protein                             |
| <b>Q96HQ2-1</b> | CDKN2AIPNL | -0.501 | CDKN2A interacting protein N-terminal like             |
| <b>O95674-1</b> | CDS2       | -0.115 | CDP-diacylglycerol synthase 2                          |
| <b>Q9UKY7</b>   | CDV3       | -0.218 | CDV3 homolog                                           |
| <b>P13688</b>   | CEACAM1    | 0.32   | CEA cell adhesion molecule 1                           |
| <b>P49715-4</b> | CEBPA      | -0.396 | CCAAT enhancer binding protein alpha                   |
| <b>Q03701</b>   | CEBPZ      | 0.315  | CCAAT enhancer binding protein zeta                    |
| <b>Q9UHN6</b>   | CEMIP2     | 0.249  | cell migration inducing hyaluronidase 2                |
| <b>P49454</b>   | CENPF      | 0.229  | centromere protein F                                   |
| <b>Q7Z7K6-1</b> | CENPV      | 0.497  | centromere protein V                                   |

|                 |         |        |                                                                   |
|-----------------|---------|--------|-------------------------------------------------------------------|
| <b>Q9UPN4</b>   | CEP131  | -0.134 | centrosomal protein 131                                           |
| <b>O15078</b>   | CEP290  | -0.159 | centrosomal protein 290                                           |
| <b>Q8TAP6</b>   | CEP76   | 0.545  | centrosomal protein 76                                            |
| <b>Q96G23</b>   | CERS2   | 0.205  | ceramide synthase 2                                               |
| <b>Q9HA82</b>   | CERS4   | -0.129 | ceramide synthase 4                                               |
| <b>Q9Y5P4-3</b> | CERT1   | -0.382 | ceramide transporter 1                                            |
| <b>O00748</b>   | CES2    | 0.129  | carboxylesterase 2                                                |
| <b>P41208</b>   | CETN2   | -0.169 | centrin 2                                                         |
| <b>Q9Y6A4</b>   | CFAP20  | 0.177  | cilia and flagella associated protein 20                          |
| <b>Q9UEE9-1</b> | CFDP1   | -0.631 | craniofacial development protein 1                                |
| <b>P05156</b>   | CFI     | -0.36  | complement factor I                                               |
| <b>P23528</b>   | CFL1    | -0.121 | cofilin 1                                                         |
| <b>Q9Y281-1</b> | CFL2    | -0.338 | cofilin 2                                                         |
| <b>Q9P2M7-1</b> | CGN     | -0.788 | cingulin                                                          |
| <b>Q0VF96</b>   | CGNL1   | -0.861 | cingulin like 1                                                   |
| <b>Q13111-1</b> | CHAF1A  | -0.221 | chromatin assembly factor 1 subunit A                             |
| <b>Q13112</b>   | CHAF1B  | 0.125  | chromatin assembly factor 1 subunit B                             |
| <b>Q9NX63</b>   | CHCHD3  | 0.17   | coiled-coil-helix-coiled-coil-helix domain containing 3           |
| <b>O14646</b>   | CHD1    | 0.283  | chromodomain helicase DNA binding protein 1                       |
| <b>O14647</b>   | CHD2    | 0.3    | chromodomain helicase DNA binding protein 2                       |
| <b>Q14839-2</b> | CHD4    | 0.266  | chromodomain helicase DNA binding protein 4                       |
| <b>Q9HCK8-1</b> | CHD8    | 0.192  | chromodomain helicase DNA binding protein 8                       |
| <b>Q8NE62</b>   | CHDH    | 0.131  | choline dehydrogenase                                             |
| <b>O14757</b>   | CHEK1   | -0.53  | checkpoint kinase 1                                               |
| <b>O96017-9</b> | CHEK2   | -0.199 | checkpoint kinase 2                                               |
| <b>Q8IWX8</b>   | CHERP   | 0.243  | calcium homeostasis endoplasmic reticulum protein                 |
| <b>Q9BWS9-1</b> | CHID1   | -0.18  | chitinase domain containing 1                                     |
| <b>P35790</b>   | CHKA    | -0.227 | choline kinase alpha                                              |
| <b>P24386-1</b> | CHM     | -0.181 | CHM Rab escort protein                                            |
| <b>Q9HD42</b>   | CHMP1A  | -0.231 | charged multivesicular body protein 1A                            |
| <b>Q9UQN3-1</b> | CHMP2B  | 0.098  | charged multivesicular body protein 2B                            |
| <b>Q9BY43-2</b> | CHMP4A  | -0.29  | charged multivesicular body protein 4A                            |
| <b>Q9H444</b>   | CHMP4B  | 0.14   | charged multivesicular body protein 4B                            |
| <b>Q9NZZ3</b>   | CHMP5   | 0.162  | charged multivesicular body protein 5                             |
| <b>Q96FZ7</b>   | CHMP6   | 0.095  | charged multivesicular body protein 6                             |
| <b>Q9UHD1</b>   | CHORDC1 | 0.47   | cysteine and histidine rich domain containing 1                   |
| <b>Q99653</b>   | CHP1    | 0.501  | calcineurin like EF-hand protein 1                                |
| <b>Q8NET6</b>   | CHST13  | -0.418 | carbohydrate sulfotransferase 13                                  |
| <b>Q8WVB6-2</b> | CHTF18  | -0.346 | chromosome transmission fidelity factor 18                        |
| <b>O76071</b>   | CIAO1   | -0.199 | cytosolic iron-sulfur assembly component 1                        |
| <b>Q9Y3D0</b>   | CIAO2B  | -0.273 | cytosolic iron-sulfur assembly component 2B                       |
| <b>Q6FI81</b>   | CIAPIN1 | -0.125 | cytokine induced apoptosis inhibitor 1                            |
| <b>Q99828-2</b> | CIB1    | 0.283  | calcium and integrin binding 1                                    |
| <b>Q8TCG1</b>   | CIP2A   | -0.134 | cell proliferation regulating inhibitor of protein phosphatase 2A |
| <b>Q86X95</b>   | CIR1    | 0.155  | corepressor interacting with RBPJ, 1                              |
| <b>Q14011</b>   | CIRBP   | -0.27  | cold inducible RNA binding protein                                |
| <b>Q9NZ45</b>   | CISD1   | 0.112  | CDGSH iron sulfur domain 1                                        |

|                 |         |        |                                                                 |
|-----------------|---------|--------|-----------------------------------------------------------------|
| <b>O14578-4</b> | CIT     | -0.328 | citron rho-interacting serine/threonine kinase                  |
| <b>Q8WWK9</b>   | CKAP2   | 0.914  | cytoskeleton associated protein 2                               |
| <b>Q07065</b>   | CKAP4   | 0.316  | cytoskeleton associated protein 4                               |
| <b>P12277</b>   | CKB     | -0.167 | creatine kinase B                                               |
| <b>Q7Z460-1</b> | CLASP1  | -0.19  | cytoplasmic linker associated protein 1                         |
| <b>O75122-3</b> | CLASP2  | -0.222 | cytoplasmic linker associated protein 2                         |
| <b>P56747</b>   | CLDN6   | 0.299  | claudin 6                                                       |
| <b>Q9Y696</b>   | CLIC4   | -0.25  | chloride intracellular channel 4                                |
| <b>Q14677</b>   | CLINT1  | -0.375 | clathrin interactor 1                                           |
| <b>Q14677-3</b> | CLINT1  | -0.361 | clathrin interactor 1                                           |
| <b>P49761</b>   | CLK3    | 0.686  | CDC like kinase 3                                               |
| <b>Q9NWW5</b>   | CLN6    | 0.103  | CLN6 transmembrane ER protein                                   |
| <b>Q16740</b>   | CLPP    | 0.28   | caseinolytic mitochondrial matrix peptidase proteolytic subunit |
| <b>O76031</b>   | CLPX    | 0.223  | caseinolytic mitochondrial matrix peptidase chaperone subunit   |
| <b>Q9HAW4</b>   | CLSPN   | 0.312  | claspin                                                         |
| <b>P09496-2</b> | CLTA    | -0.152 | clathrin light chain A                                          |
| <b>P09497-2</b> | CLTB    | 0.462  | clathrin light chain B                                          |
| <b>P10909-2</b> | CLU     | 0.877  | clusterin                                                       |
| <b>I3L2B0</b>   | CLUH    | -0.367 | clustered mitochondria homolog                                  |
| <b>O75153</b>   | CLUH    | -0.354 | clustered mitochondria homolog                                  |
| <b>Q8N0X4</b>   | CLYBL   | 0.126  | citrate lyase beta like                                         |
| <b>Q96DG6</b>   | CMBL    | 0.267  | carboxymethylenebutenolidase homolog                            |
| <b>Q8IY22</b>   | CMIP    | -0.694 | c-Maf inducing protein                                          |
| <b>Q9BQ75</b>   | CMSS1   | -0.185 | cms1 ribosomal small subunit homolog                            |
| <b>P62633</b>   | CNBP    | -1.238 | CCHC-type zinc finger nucleic acid binding protein              |
| <b>P62633-6</b> | CNBP    | -0.982 | CCHC-type zinc finger nucleic acid binding protein              |
| <b>Q96KP4</b>   | CNDP2   | -0.335 | carnosine dipeptidase 2                                         |
| <b>Q99439</b>   | CNN2    | -0.118 | calponin 2                                                      |
| <b>Q15417</b>   | CNN3    | 0.103  | calponin 3                                                      |
| <b>A5YKK6</b>   | CNOT1   | -0.207 | CCR4-NOT transcription complex subunit 1                        |
| <b>Q9H9A5-6</b> | CNOT10  | -0.27  | CCR4-NOT transcription complex subunit 10                       |
| <b>Q9NZN8</b>   | CNOT2   | -0.18  | CCR4-NOT transcription complex subunit 2                        |
| <b>Q96LI5</b>   | CNOT6L  | -0.452 | CCR4-NOT transcription complex subunit 6 like                   |
| <b>Q9UIV1-1</b> | CNOT7   | -0.521 | CCR4-NOT transcription complex subunit 7                        |
| <b>Q92600</b>   | CNOT9   | -0.331 | CCR4-NOT transcription complex subunit 9                        |
| <b>Q9Y2R0</b>   | COA3    | 0.127  | cytochrome c oxidase assembly factor 3                          |
| <b>Q9NYJ1-2</b> | COA4    | -0.45  | cytochrome c oxidase assembly factor 4 homolog                  |
| <b>Q96JB2-1</b> | COG3    | -0.194 | component of oligomeric golgi complex 3                         |
| <b>Q9H9E3</b>   | COG4    | -0.161 | component of oligomeric golgi complex 4                         |
| <b>Q9Y2V7-1</b> | COG6    | -0.129 | component of oligomeric golgi complex 6                         |
| <b>Q96MW5</b>   | COG8    | -0.12  | component of oligomeric golgi complex 8                         |
| <b>P38432</b>   | COIL    | 0.272  | coilin                                                          |
| <b>P39060-3</b> | COL18A1 | -0.296 | collagen type XVIII alpha 1 chain                               |
| <b>Q86X83</b>   | COMM2   | -0.126 | COMM domain containing 2                                        |
| <b>Q7Z4G1-2</b> | COMM6   | -0.704 | COMM domain containing 6                                        |
| <b>Q9NX08</b>   | COMM8   | -0.489 | COMM domain containing 8                                        |
| <b>Q9P000-1</b> | COMM9   | -0.535 | COMM domain containing 9                                        |

|          |         |        |                                                             |
|----------|---------|--------|-------------------------------------------------------------|
| P53621-2 | COPA    | -0.145 | coatomer protein complex subunit alpha                      |
| P53618   | COPB1   | -0.135 | coatomer protein complex subunit beta 1                     |
| P35606   | COPB2   | -0.17  | coatomer protein complex subunit beta 2                     |
| O14579-1 | COPE    | -0.194 | coatomer protein complex subunit epsilon                    |
| Q9Y678   | COPG1   | -0.103 | coatomer protein complex subunit gamma 1                    |
| Q9UBF2   | COPG2   | -0.23  | coatomer protein complex subunit gamma 2                    |
| P61201-1 | COPS2   | -0.173 | COP9 signalosome subunit 2                                  |
| Q9UNS2   | COPS3   | -0.182 | COP9 signalosome subunit 3                                  |
| Q9BT78   | COPS4   | -0.21  | COP9 signalosome subunit 4                                  |
| Q92905   | COPS5   | -0.176 | COP9 signalosome subunit 5                                  |
| Q9UBW8   | COPS7A  | -0.151 | COP9 signalosome subunit 7A                                 |
| Q99627   | COPS8   | -0.126 | COP9 signalosome subunit 8                                  |
| P61923-4 | COPZ1   | -0.138 | coatomer protein complex subunit zeta 1                     |
| Q5HYK3-1 | COQ5    | -0.394 | coenzyme Q5, methyltransferase                              |
| P31146   | CORO1A  | -0.187 | coronin 1A                                                  |
| Q9ULV4-3 | CORO1C  | 0.154  | coronin 1C                                                  |
| Q14019   | COTL1   | -0.414 | coactosin like F-actin binding protein 1                    |
| Q7KZN9   | COX15   | -0.092 | cytochrome c oxidase assembly homolog COX15                 |
| P13073   | COX41   | 0.289  | cytochrome c oxidase subunit 411                            |
| P20674   | COX5A   | 0.142  | cytochrome c oxidase subunit 5A                             |
| P09669   | COX6C   | 0.198  | cytochrome c oxidase subunit 6C                             |
| P14406   | COX7A2  | 0.16   | cytochrome c oxidase subunit 7A2                            |
| O75976   | CPD     | -0.405 | carboxypeptidase D                                          |
| Q17RY0-1 | CPEB4   | 0.255  | cytoplasmic polyadenylation element binding protein 4       |
| Q6PUV4   | CPLX2   | -0.569 | complexin 2                                                 |
| Q9BRF8-1 | CPPED1  | -0.392 | calcineurin like phosphoesterase domain containing 1        |
| P31327-3 | CPS1    | 0.149  | carbamoyl-phosphate synthase 1                              |
| Q16630-2 | CPSF6   | 0.141  | cleavage and polyadenylation specific factor 6              |
| P50416   | CPT1A   | 0.116  | carnitine palmitoyltransferase 1A                           |
| P23786   | CPT2    | 0.403  | carnitine palmitoyltransferase 2                            |
| P78560   | CRADD   | -0.389 | CASP2 and RIPK1 domain containing adaptor with death domain |
| P43155   | CRAT    | 0.441  | carnitine O-acetyltransferase                               |
| Q92793-1 | CREBBP  | -0.26  | CREB binding protein                                        |
| P52943   | CRIP2   | 0.219  | cysteine rich protein 2                                     |
| P46108-1 | CRK     | -0.275 | CRK proto-oncogene, adaptor protein                         |
| P46109   | CRKL    | -0.245 | CRK like proto-oncogene, adaptor protein                    |
| Q8IU18   | CRLF3   | -0.163 | cytokine receptor like factor 3                             |
| Q9BZJ0   | CRNKL1  | 0.219  | crooked neck pre-mRNA splicing factor 1                     |
| P02511   | CRYAB   | 1.788  | crystallin alpha B                                          |
| Q9Y2S2-1 | CRYL1   | -0.381 | crystallin lambda 1                                         |
| Q08257   | CRYZ    | 0.16   | crystallin zeta                                             |
| O75390   | CS      | 0.31   | citrate synthase                                            |
| P55060   | CSE1L   | -0.361 | chromosome segregation 1 like                               |
| P41240   | CSK     | -0.189 | C-terminal Src kinase                                       |
| P48729   | CSNK1A1 | 0.136  | casein kinase 1 alpha 1                                     |
| P68400   | CSNK2A1 | 0.226  | casein kinase 2 alpha 1                                     |
| P19784   | CSNK2A2 | 0.301  | casein kinase 2 alpha 2                                     |

|          |          |        |                                                        |
|----------|----------|--------|--------------------------------------------------------|
| P67870   | CSNK2B   | 0.361  | casein kinase 2 beta                                   |
| P01034   | CST3     | -0.296 | cystatin C                                             |
| Q12996   | CSTF3    | 0.275  | cleavage stimulation factor subunit 3                  |
| Q13363   | CTBP1    | -0.158 | C-terminal binding protein 1                           |
| P49711-1 | CTCF     | 0.251  | CCCTC-binding factor                                   |
| Q9Y5B0   | CTDP1    | -0.208 | CTD phosphatase subunit 1                              |
| P32929   | CTH      | 0.252  | cystathionine gamma-lyase                              |
| P35221   | CTNNA1   | -0.273 | catenin alpha 1                                        |
| Q9NSA3   | CTNNBIP1 | -0.505 | catenin beta interacting protein 1                     |
| Q8WYA6   | CTNBL1   | -0.118 | catenin beta like 1                                    |
| O60716-3 | CTNND1   | -0.146 | catenin delta 1                                        |
| P17812   | CTPS1    | -0.158 | CTP synthase 1                                         |
| Q9NRF8   | CTPS2    | -0.31  | CTP synthase 2                                         |
| Q6PD62   | CTR9     | 0.328  | CTR9 homolog, Paf1/RNA polymerase II complex component |
| P07858   | CTSB     | 0.186  | cathepsin B                                            |
| P07711   | CTSL     | 0.529  | cathepsin L                                            |
| Q14247-1 | CTTN     | -0.33  | cortactin                                              |
| Q2VPK5   | CTU2     | -0.183 | cytosolic thiouridylase subunit 2                      |
| Q13616   | CUL1     | -0.176 | cullin 1                                               |
| Q13617-2 | CUL2     | -0.1   | cullin 2                                               |
| Q13619-1 | CUL4A    | -0.096 | cullin 4A                                              |
| Q93034   | CUL5     | -0.174 | cullin 5                                               |
| O60888-2 | CUTA     | -0.168 | cutA divalent cation tolerance homolog                 |
| P39880-3 | CUX1     | -0.354 | cut like homeobox 1                                    |
| Q6UX04   | CWC27    | -0.216 | CWC27 spliceosome associated cyclophilin               |
| Q2TBE0   | CWF19L2  | -0.111 | CWF19 like cell cycle control factor 2                 |
| P78310-1 | CXADR    | -0.108 | CXADR Ig-like cell adhesion molecule                   |
| Q9P0U4-2 | CXXC1    | 0.199  | CXXC finger protein 1                                  |
| P00167-1 | CYB5A    | -0.414 | cytochrome b5 type A                                   |
| Q9UHQ9   | CYB5R1   | 0.362  | cytochrome b5 reductase 1                              |
| P00387-3 | CYB5R3   | 0.205  | cytochrome b5 reductase 3                              |
| Q7L1T6   | CYB5R4   | -0.142 | cytochrome b5 reductase 4                              |
| P08574   | CYC1     | 0.302  | cytochrome c1                                          |
| Q7L576-1 | CYFIP1   | -0.241 | cytoplasmic FMR1 interacting protein 1                 |
| Q07973-1 | CYP24A1  | 0.262  | cytochrome P450 family 24 subfamily A member 1         |
| Q96SQ9-2 | CYP2S1   | 0.436  | cytochrome P450 family 2 subfamily S member 1          |
| Q8TAV3   | CYP2W1   | -0.229 | cytochrome P450 family 2 subfamily W member 1          |
| Q9HBI6   | CYP4F11  | 0.333  | cytochrome P450 family 4 subfamily F member 11         |
| Q16850-1 | CYP51A1  | -0.564 | cytochrome P450 family 51 subfamily A member 1         |
| Q9Y4D1   | DAAM1    | -0.182 | dishevelled associated activator of morphogenesis 1    |
| Q5VWQ8   | DAB2IP   | -0.418 | DAB2 interacting protein                               |
| Q14118   | DAG1     | -0.287 | dystroglycan 1                                         |
| P51397   | DAP      | -0.539 | death associated protein                               |
| O43293-1 | DAPK3    | 0.274  | death associated protein kinase 3                      |
| Q6PI48   | DARS2    | 0.256  | aspartyl-tRNA synthetase 2, mitochondrial              |
| P07108-5 | DBI      | -0.948 | diazepam binding inhibitor, acyl-CoA binding protein   |
| Q9UK59   | DBR1     | 0.207  | debranching RNA lariats 1                              |

|          |         |        |                                                                                      |
|----------|---------|--------|--------------------------------------------------------------------------------------|
| P11182   | DBT     | 0.328  | dihydrolipoamide branched chain transacylase E2                                      |
| Q9Y4B6   | DCAF1   | -0.321 | DDB1 and CUL4 associated factor 1                                                    |
| Q8TEB1   | DCAF11  | -0.11  | DDB1 and CUL4 associated factor 11                                                   |
| Q96JK2   | DCAF5   | 0.154  | DDB1 and CUL4 associated factor 5                                                    |
| P61962   | DCAF7   | 0.379  | DDB1 and CUL4 associated factor 7                                                    |
| Q8WVC6-1 | DCAKD   | 0.152  | dephospho-CoA kinase domain containing                                               |
| Q9NPI6   | DCP1A   | 0.197  | decapping mRNA 1A                                                                    |
| Q8IZD4   | DCP1B   | 0.205  | decapping mRNA 1B                                                                    |
| Q96C86   | DCPS    | -0.404 | decapping enzyme, scavenger                                                          |
| Q14203-4 | DCTN1   | -0.215 | dynactin subunit 1                                                                   |
| Q13561-2 | DCTN2   | -0.245 | dynactin subunit 2                                                                   |
| O75935   | DCTN3   | -0.219 | dynactin subunit 3                                                                   |
| Q9UJW0-3 | DCTN4   | 0.312  | dynactin subunit 4                                                                   |
| O00399   | DCTN6   | 0.362  | dynactin subunit 6                                                                   |
| Q9H773   | DCTPP1  | -0.434 | dCTP pyrophosphatase 1                                                               |
| Q8IWE4   | DCUN1D3 | 0.353  | defective in cullin neddylation 1 domain containing 3                                |
| Q7Z4W1   | DCXR    | 0.173  | dicarbonyl and L-xylulose reductase                                                  |
| Q9BW61   | DDA1    | -0.175 | DET1 and DDB1 associated 1                                                           |
| O94760   | DDAH1   | -0.401 | dimethylarginine dimethylaminohydrolase 1                                            |
| Q16531   | DDB1    | -0.172 | damage specific DNA binding protein 1                                                |
| Q92466   | DDB2    | 0.393  | damage specific DNA binding protein 2                                                |
| Q5TDH0-3 | DDI2    | -0.302 | DNA damage inducible 1 homolog 2                                                     |
| P39656   | DDOST   | 0.198  | dolichyl-diphosphooligosaccharide--protein glycosyltransferase non-catalytic subunit |
| P30046   | DDT     | -0.396 | D-dopachrome tautomerase                                                             |
| Q92841   | DDX17   | -0.128 | DEAD-box helicase 17                                                                 |
| Q9NUU7   | DDX19A  | -0.164 | DEAD-box helicase 19A                                                                |
| Q9NR30   | DDX21   | 0.507  | DEAD-box helicase 21                                                                 |
| Q9BUQ8   | DDX23   | 0.125  | DEAD-box helicase 23                                                                 |
| Q9GZR7   | DDX24   | 0.292  | DEAD-box helicase 24                                                                 |
| Q96GQ7   | DDX27   | -0.214 | DEAD-box helicase 27                                                                 |
| O00148   | DDX39A  | -0.221 | DEAD-box helicase 39A                                                                |
| Q13838-2 | DDX39B  | -0.176 | DEAD-box helicase 39B                                                                |
| O15523   | DDX3Y   | 0.182  | DEAD-box helicase 3 Y-linked                                                         |
| Q86XP3   | DDX42   | -0.166 | DEAD-box helicase 42                                                                 |
| Q9H0S4   | DDX47   | 0.224  | DEAD-box helicase 47                                                                 |
| P17844   | DDX5    | -0.121 | DEAD-box helicase 5                                                                  |
| Q9Y2R4   | DDX52   | 0.266  | DEAD-box helicase 52                                                                 |
| Q9NY93   | DDX56   | -0.566 | DEAD-box helicase 56                                                                 |
| P26196   | DDX6    | 0.115  | DEAD-box helicase 6                                                                  |
| Q16698   | DECR1   | 0.368  | 2,4-dienoyl-CoA reductase 1                                                          |
| Q9NUI1   | DECR2   | 0.275  | 2,4-dienoyl-CoA reductase 2                                                          |
| Q9H4E7   | DEF6    | -0.145 | DEF6 guanine nucleotide exchange factor                                              |
| Q8TCE6-1 | DENND10 | -0.275 | DENN domain containing 10                                                            |
| O43583   | DENR    | -0.418 | density regulated re-initiation and release factor                                   |
| Q9Y315   | DERA    | -0.194 | deoxyribose-phosphate aldolase                                                       |
| Q8WYQ5-1 | DGCR8   | 0.416  | DGCR8 microprocessor complex subunit                                                 |
| Q5KSL6   | DGKK    | -0.44  | diacylglycerol kinase kappa                                                          |

|          |         |        |                                                                  |
|----------|---------|--------|------------------------------------------------------------------|
| Q16854   | DGUOK   | 0.216  | deoxyguanosine kinase                                            |
| Q02127   | DHODH   | 0.146  | dihydroorotate dehydrogenase (quinone)                           |
| Q13268   | DHRS2   | 0.124  | dehydrogenase/reductase 2                                        |
| Q9BTZ2   | DHRS4   | 0.256  | dehydrogenase/reductase 4                                        |
| Q9Y394   | DHRS7   | 0.293  | dehydrogenase/reductase 7                                        |
| O43143   | DHX15   | 0.161  | DEAH-box helicase 15                                             |
| Q7L2E3-2 | DHX30   | 0.374  | DExH-box helicase 30                                             |
| Q9H5Z1   | DHX35   | 0.317  | DEAH-box helicase 35                                             |
| Q92620   | DHX38   | 0.156  | DEAH-box helicase 38                                             |
| Q6P158-1 | DHX57   | -0.44  | DExH-box helicase 57                                             |
| Q08211   | DHX9    | 0.191  | DExH-box helicase 9                                              |
| O60610-1 | DIAPH1  | -0.268 | diaphanous related formin 1                                      |
| Q9UPY3   | DICER1  | -0.198 | dicer 1, ribonuclease III                                        |
| Q9BTC0   | DIDO1   | 0.277  | death inducer-obliterator 1                                      |
| Q9UNQ2   | DIMT1   | -0.207 | DIMT1 rRNA methyltransferase and ribosome maturation factor      |
| Q9P265   | DIP2B   | -0.259 | disco interacting protein 2 homolog B                            |
| Q9Y2L1   | DIS3    | 0.151  | DIS3 homolog, exosome endoribonuclease and 3'-5' exoribonuclease |
| Q8IYB7   | DIS3L2  | -0.305 | DIS3 like 3'-5' exoribonuclease 2                                |
| O60832   | DKC1    | 0.29   | dyskerin pseudouridine synthase 1                                |
| P10515   | DLAT    | 0.109  | dihydrolipoamide S-acetyltransferase                             |
| P09622   | DLD     | 0.363  | dihydrolipoamide dehydrogenase                                   |
| Q9Y2H0   | DLGAP4  | -0.173 | DLG associated protein 4                                         |
| P36957   | DLST    | 0.289  | dihydrolipoamide S-succinyltransferase                           |
| Q9NPF5   | DMAP1   | 0.126  | DNA methyltransferase 1 associated protein 1                     |
| P11532-6 | DMD     | -0.155 | dystrophin                                                       |
| Q08495-1 | DMTN    | -0.268 | dematin actin binding protein                                    |
| Q86Y56   | DNAAF5  | -0.421 | dynein axonemal assembly factor 5                                |
| P31689   | DNAJA1  | 0.543  | DnaJ heat shock protein family (Hsp40) member A1                 |
| P25685   | DNAJB1  | 0.934  | DnaJ heat shock protein family (Hsp40) member B1                 |
| Q9UBS4   | DNAJB11 | 0.122  | DnaJ heat shock protein family (Hsp40) member B11                |
| P25686-3 | DNAJB2  | 0.478  | DnaJ heat shock protein family (Hsp40) member B2                 |
| Q9UDY4   | DNAJB4  | 1.193  | DnaJ heat shock protein family (Hsp40) member B4                 |
| Q9NVH1-1 | DNAJC11 | 0.162  | DnaJ heat shock protein family (Hsp40) member C11                |
| O75165   | DNAJC13 | -0.112 | DnaJ heat shock protein family (Hsp40) member C13                |
| Q9Y5T4   | DNAJC15 | -0.583 | DnaJ heat shock protein family (Hsp40) member C15                |
| Q9NVM6   | DNAJC17 | -0.142 | DnaJ heat shock protein family (Hsp40) member C17                |
| Q96DA6   | DNAJC19 | 0.398  | DnaJ heat shock protein family (Hsp40) member C19                |
| Q99543-1 | DNAJC2  | -0.288 | DnaJ heat shock protein family (Hsp40) member C2                 |
| Q9H3Z4   | DNAJC5  | -0.693 | DnaJ heat shock protein family (Hsp40) member C5                 |
| Q99615-1 | DNAJC7  | 0.117  | DnaJ heat shock protein family (Hsp40) member C7                 |
| P50570   | DNM2    | -0.364 | dynamain 2                                                       |
| Q9Y6K1   | DNMT3A  | 0.131  | DNA methyltransferase 3 alpha                                    |
| Q9ULA0   | DNPEP   | -0.282 | aspartyl aminopeptidase                                          |
| O43598-1 | DNPH1   | -0.462 | 2'-deoxynucleoside 5'-phosphate N-hydrolase 1                    |
| Q5QJE6   | DNTTIP2 | 0.385  | deoxynucleotidyltransferase terminal interacting protein 2       |
| Q8N110-3 | DOCK4   | -0.25  | dedicator of cytokinesis 4                                       |
| Q9H3H5   | DPAGT1  | 0.926  | dolichyl-phosphate N-acetylglucosaminephosphotransferase 1       |

|          |          |        |                                                             |
|----------|----------|--------|-------------------------------------------------------------|
| Q9BZG8   | DPH1     | -0.495 | diphthamide biosynthesis 1                                  |
| Q9BQC3   | DPH2     | -0.179 | diphthamide biosynthesis 2                                  |
| Q9H2P9-5 | DPH5     | -0.64  | diphthamide biosynthesis 5                                  |
| O60762   | DPM1     | 0.106  | dolichyl-phosphate mannosyltransferase subunit 1, catalytic |
| Q9NY33   | DPP3     | -0.2   | dipeptidyl peptidase 3                                      |
| P27487   | DPP4     | 0.154  | dipeptidyl peptidase 4                                      |
| Q86T12-2 | DPP9     | -0.188 | dipeptidyl peptidase 9                                      |
| Q16555   | DPYSL2   | -0.331 | dihydropyrimidinase like 2                                  |
| Q9Y295   | DRG1     | -0.187 | developmentally regulated GTP binding protein 1             |
| Q9H410   | DSN1     | -0.281 | DSN1 component of MIS12 kinetochore complex                 |
| P60981-1 | DSTN     | 0.165  | destrin, actin depolymerizing factor                        |
| Q8TEA8   | DTD1     | -0.139 | D-aminoacyl-tRNA deacylase 1                                |
| P23919   | DTYMK    | -0.136 | deoxythymidylate kinase                                     |
| Q6P1R4   | DUS1L    | -0.14  | dihydrouridine synthase 1 like                              |
| P28562   | DUSP1    | 1.431  | dual specificity phosphatase 1                              |
| O75319-1 | DUSP11   | 0.221  | dual specificity phosphatase 11                             |
| P33316-3 | DUT      | -0.261 | deoxyuridine triphosphatase                                 |
| O14641   | DVL2     | -0.283 | dishevelled segment polarity protein 2                      |
| Q14204   | DYNC1H1  | -0.261 | dynein cytoplasmic 1 heavy chain 1                          |
| Q9Y6G9   | DYNC1LI1 | -0.17  | dynein cytoplasmic 1 light intermediate chain 1             |
| O43237   | DYNC1LI2 | -0.11  | dynein cytoplasmic 1 light intermediate chain 2             |
| P63167   | DYNLL1   | 0.865  | dynein light chain LC8-type 1                               |
| Q96FJ2   | DYNLL2   | 0.539  | dynein light chain LC8-type 2                               |
| Q9NP97   | DYNLRB1  | -0.13  | dynein light chain roadblock-type 1                         |
| Q16254   | E2F4     | -0.272 | E2F transcription factor 4                                  |
| Q99848   | EBNA1BP2 | -0.218 | EBNA1 binding protein 2                                     |
| O95905-3 | ECD      | 0.288  | ecdysoneless cell cycle regulator                           |
| P42892   | ECE1     | -0.394 | endothelin converting enzyme 1                              |
| Q13011   | ECH1     | 0.287  | enoyl-CoA hydratase 1                                       |
| Q9NTX5   | ECHDC1   | 0.219  | ethylmalonyl-CoA decarboxylase 1                            |
| P30084   | ECHS1    | 0.187  | enoyl-CoA hydratase, short chain 1                          |
| P42126   | ECI1     | 0.204  | enoyl-CoA delta isomerase 1                                 |
| O75521   | ECI2     | 0.342  | enoyl-CoA delta isomerase 2                                 |
| Q5VYK3   | ECPAS    | -0.135 | Ecm29 proteasome adaptor and scaffold                       |
| Q9BQ95   | ECSIT    | 0.261  | ECSIT signalling integrator                                 |
| Q9H8V3-3 | ECT2     | 0.27   | epithelial cell transforming 2                              |
| O60869   | EDF1     | 0.254  | endothelial differentiation related factor 1                |
| P68104   | EEF1A1   | 0.127  | eukaryotic translation elongation factor 1 alpha 1          |
| P26641-2 | EEF1G    | -0.109 | eukaryotic translation elongation factor 1 gamma            |
| P13639   | EEF2     | -0.168 | eukaryotic translation elongation factor 2                  |
| O00418   | EEF2K    | -0.476 | eukaryotic elongation factor 2 kinase                       |
| Q7Z222   | EFL1     | -0.355 | elongation factor like GTPase 1                             |
| Q8NDI1   | EHBP1    | -0.436 | EH domain binding protein 1                                 |
| Q9H4M9   | EHD1     | -0.092 | EH domain containing 1                                      |
| Q08426   | EHHADH   | 0.257  | enoyl-CoA hydratase and 3-hydroxyacyl CoA dehydrogenase     |
| P41567   | EIF1     | 0.653  | eukaryotic translation initiation factor 1                  |
| P19525   | EIF2AK2  | 0.154  | eukaryotic translation initiation factor 2 alpha kinase 2   |

|          |          |        |                                                               |
|----------|----------|--------|---------------------------------------------------------------|
| Q9NZJ5   | EIF2AK3  | -0.305 | eukaryotic translation initiation factor 2 alpha kinase 3     |
| Q9P2K8-1 | EIF2AK4  | -0.218 | eukaryotic translation initiation factor 2 alpha kinase 4     |
| Q14232   | EIF2B1   | -0.347 | eukaryotic translation initiation factor 2B subunit alpha     |
| Q9NR50-1 | EIF2B3   | -0.138 | eukaryotic translation initiation factor 2B subunit gamma     |
| Q13144   | EIF2B5   | -0.219 | eukaryotic translation initiation factor 2B subunit epsilon   |
| P41214   | EIF2D    | -0.326 | eukaryotic translation initiation factor 2D                   |
| P05198   | EIF2S1   | 0.098  | eukaryotic translation initiation factor 2 subunit alpha      |
| Q14152   | EIF3A    | -0.196 | eukaryotic translation initiation factor 3 subunit A          |
| P55884-2 | EIF3B    | -0.115 | eukaryotic translation initiation factor 3 subunit B          |
| Q99613   | EIF3C    | -0.105 | eukaryotic translation initiation factor 3 subunit C          |
| O75821   | EIF3G    | -0.307 | eukaryotic translation initiation factor 3 subunit G          |
| O15372   | EIF3H    | -0.088 | eukaryotic translation initiation factor 3 subunit H          |
| O75822   | EIF3J    | -0.29  | eukaryotic translation initiation factor 3 subunit J          |
| Q9UBQ5   | EIF3K    | -0.48  | eukaryotic translation initiation factor 3 subunit K          |
| Q7L2H7   | EIF3M    | -0.261 | eukaryotic translation initiation factor 3 subunit M          |
| Q14240-2 | EIF4A2   | -0.214 | eukaryotic translation initiation factor 4A2                  |
| P38919   | EIF4A3   | 0.191  | eukaryotic translation initiation factor 4A3                  |
| P23588   | EIF4B    | -0.299 | eukaryotic translation initiation factor 4B                   |
| P06730-2 | EIF4E    | -0.178 | eukaryotic translation initiation factor 4E                   |
| O60573   | EIF4E2   | -0.235 | eukaryotic translation initiation factor 4E family member 2   |
| Q13541   | EIF4EBP1 | -0.288 | eukaryotic translation initiation factor 4E binding protein 1 |
| Q04637-9 | EIF4G1   | -0.308 | eukaryotic translation initiation factor 4 gamma 1            |
| O43432-3 | EIF4G3   | -0.403 | eukaryotic translation initiation factor 4 gamma 3            |
| Q15056-1 | EIF4H    | -0.296 | eukaryotic translation initiation factor 4H                   |
| P55010   | EIF5     | 0.152  | eukaryotic translation initiation factor 5                    |
| P63241-2 | EIF5A    | -0.198 | eukaryotic translation initiation factor 5A                   |
| Q9BQ52   | ELAC2    | -0.108 | elaC ribonuclease Z 2                                         |
| P32519   | ELF1     | -0.173 | E74 like ETS transcription factor 1                           |
| P55199   | ELL      | 0.507  | elongation factor for RNA polymerase II                       |
| O00472   | ELL2     | 0.224  | elongation factor for RNA polymerase II 2                     |
| Q14241   | ELOA     | 0.496  | elongin A                                                     |
| Q15370-2 | ELOB     | -0.249 | elongin B                                                     |
| O95163   | ELP1     | -0.274 | elongator complex protein 1                                   |
| Q6IA86-6 | ELP2     | -0.197 | elongator acetyltransferase complex subunit 2                 |
| Q9H9T3   | ELP3     | -0.366 | elongator acetyltransferase complex subunit 3                 |
| Q15006   | EMC2     | 0.214  | ER membrane protein complex subunit 2                         |
| Q9P0I2   | EMC3     | 0.212  | ER membrane protein complex subunit 3                         |
| Q9NPA0   | EMC7     | 0.134  | ER membrane protein complex subunit 7                         |
| O43402   | EMC8     | 0.187  | ER membrane protein complex subunit 8                         |
| P50402   | EMD      | 0.167  | emerin                                                        |
| Q92979   | EMG1     | -0.136 | EMG1 N1-specific pseudouridine methyltransferase              |
| Q9HC35   | EML4     | -0.165 | EMAP like 4                                                   |
| Q8N8S7   | ENAH     | -0.224 | ENAH actin regulator                                          |
| O14682   | ENC1     | 0.674  | ectodermal-neural cortex 1                                    |
| O94919   | ENDOD1   | 0.191  | endonuclease domain containing 1                              |
| Q14249   | ENDOG    | -0.093 | endonuclease G                                                |
| P06733-1 | ENO1     | -0.259 | enolase 1                                                     |

|          |          |        |                                                              |
|----------|----------|--------|--------------------------------------------------------------|
| P09104   | ENO2     | -0.153 | enolase 2                                                    |
| P13929-1 | ENO3     | -0.486 | enolase 3                                                    |
| Q9UHY7   | ENOPH1   | -0.362 | enolase-phosphatase 1                                        |
| Q7L5Y1-5 | ENOSF1   | -0.202 | enolase superfamily member 1                                 |
| P22413   | ENPP1    | -0.23  | ectonucleotide pyrophosphatase/phosphodiesterase 1           |
| O43768-4 | ENSA     | -0.527 | endosulfine alpha                                            |
| Q5NDL2   | EOGT     | -0.132 | EGF domain specific O-linked N-acetylglucosamine transferase |
| O43491-4 | EPB41L2  | -0.244 | erythrocyte membrane protein band 4.1 like 2                 |
| P16422   | EPCAM    | -0.177 | epithelial cell adhesion molecule                            |
| P29317   | EPHA2    | 0.832  | EPH receptor A2                                              |
| P54760   | EPHB4    | 0.155  | EPH receptor B4                                              |
| P07099   | EPHX1    | 0.445  | epoxide hydrolase 1                                          |
| Q7L775   | EPM2AIP1 | 0.198  | EPM2A interacting protein 1                                  |
| O95208   | EPN2     | -0.569 | epsin 2                                                      |
| P42566   | EPS15    | -0.236 | epidermal growth factor receptor pathway substrate 15        |
| O75616   | ERAL1    | 0.303  | Era like 12S mitochondrial rRNA chaperone 1                  |
| Q9NZ08-2 | ERAP1    | -0.116 | endoplasmic reticulum aminopeptidase 1                       |
| P04626   | ERBB2    | -0.268 | erb-b2 receptor tyrosine kinase 2                            |
| P21860   | ERBB3    | -0.316 | erb-b2 receptor tyrosine kinase 3                            |
| Q8IUD2-1 | ERC1     | -0.353 | ELKS/RAB6-interacting/CAST family member 1                   |
| P18074-1 | ERCC2    | -0.084 | ERCC excision repair 2, TFIIH core complex helicase subunit  |
| P19447   | ERCC3    | 0.516  | ERCC excision repair 3, TFIIH core complex helicase subunit  |
| Q969X5   | ERGIC1   | 0.102  | endoplasmic reticulum-golgi intermediate compartment 1       |
| Q96RQ1   | ERGIC2   | 0.124  | ERGIC and golgi 2                                            |
| Q9Y282-3 | ERGIC3   | 0.325  | ERGIC and golgi 3                                            |
| P84090   | ERH      | 0.25   | ERH mRNA splicing and mitosis factor                         |
| O94905   | ERLIN2   | 0.185  | ER lipid raft associated 2                                   |
| Q7Z2K6   | ERMP1    | 0.14   | endoplasmic reticulum metalloproteinase 1                    |
| P30040   | ERP29    | 0.186  | endoplasmic reticulum protein 29                             |
| Q96AP7   | ESAM     | 0.313  | endothelial cell adhesion molecule                           |
| P10768   | ESD      | -0.117 | esterase D                                                   |
| B1AK53-1 | ESPN     | -0.733 | espin                                                        |
| Q9H6T0   | ESRP2    | -0.14  | epithelial splicing regulatory protein 2                     |
| Q96DF8   | ESS2     | -0.326 | ess-2 splicing factor homolog                                |
| A0FGR8-2 | ESYT2    | 0.176  | extended synaptotagmin 2                                     |
| P62495   | ETF1     | -0.381 | eukaryotic translation termination factor 1                  |
| P13804-1 | ETFA     | 0.205  | electron transfer flavoprotein subunit alpha                 |
| P38117   | ETFB     | 0.328  | electron transfer flavoprotein subunit beta                  |
| Q01844-5 | EWSR1    | -0.244 | EWS RNA binding protein 1                                    |
| O60645   | EXOC3    | -0.339 | exocyst complex component 3                                  |
| Q9Y2D4   | EXOC6B   | -0.355 | exocyst complex component 6B                                 |
| Q9UPT5   | EXOC7    | -0.094 | exocyst complex component 7                                  |
| Q9Y2C4   | EXOG     | 0.165  | exo/endonuclease G                                           |
| Q01780   | EXOSC10  | 0.253  | exosome component 10                                         |
| Q9NQ15   | EXOSC3   | 0.197  | exosome component 3                                          |
| Q96B26   | EXOSC8   | -0.301 | exosome component 8                                          |
| P00734   | F2       | -0.322 | coagulation factor II, thrombin                              |

|          |          |        |                                                   |
|----------|----------|--------|---------------------------------------------------|
| P07148   | FABP1    | -0.848 | fatty acid binding protein 1                      |
| O60427   | FADS1    | -0.096 | fatty acid desaturase 1                           |
| O95864   | FADS2    | -0.378 | fatty acid desaturase 2                           |
| Q9UNN5   | FAF1     | -0.539 | Fas associated factor 1                           |
| Q96CS3   | FAF2     | 0.262  | Fas associated factor family member 2             |
| P16930   | FAH      | -0.37  | fumarylacetoacetate hydrolase                     |
| Q6P587-3 | FAHD1    | 0.105  | fumarylacetoacetate hydrolase domain containing 1 |
| Q9H098-2 | FAM107B  | -0.114 | family with sequence similarity 107 member B      |
| Q8IWE2   | FAM114A1 | -0.284 | family with sequence similarity 114 member A1     |
| Q9NRY5   | FAM114A2 | -0.319 | family with sequence similarity 114 member A2     |
| Q9NZB2-6 | FAM120A  | -0.172 | family with sequence similarity 120A              |
| Q96E09   | FAM122A  | -0.325 | family with sequence similarity 122A              |
| Q96C01   | FAM136A  | -0.237 | family with sequence similarity 136 member A      |
| Q8N128-2 | FAM177A1 | 0.214  | family with sequence similarity 177 member A1     |
| Q9GZU8   | FAM192A  | -0.139 | family with sequence similarity 192 member A      |
| Q9NSI2   | FAM207A  | -0.423 | family with sequence similarity 207 member A      |
| Q96ND0   | FAM210A  | 0.593  | family with sequence similarity 210 member A      |
| Q96KR6   | FAM210B  | 0.433  | family with sequence similarity 210 member B      |
| Q92520   | FAM3C    | 0.15   | family with sequence similarity 3 member C        |
| Q9NUQ9   | FAM49B   | -0.128 | family with sequence similarity 49 member B       |
| Q9H4H8   | FAM83D   | 0.297  | family with sequence similarity 83 member D       |
| Q52LJ0-2 | FAM98B   | 0.212  | family with sequence similarity 98 member B       |
| Q9BXW9-1 | FANCD2   | -0.197 | FA complementation group D2                       |
| Q9NVI1   | FANCI    | -0.261 | FA complementation group I                        |
| Q9Y285   | FARSA    | -0.185 | phenylalanyl-tRNA synthetase subunit alpha        |
| Q9NSD9   | FARSB    | -0.246 | phenylalanyl-tRNA synthetase subunit beta         |
| P25445   | FAS      | 0.699  | Fas cell surface death receptor                   |
| P49327   | FASN     | -0.353 | fatty acid synthase                               |
| Q9NYY8   | FASTKD2  | 0.185  | FAST kinase domains 2                             |
| Q7L8L6   | FASTKD5  | 0.862  | FAST kinase domains 5                             |
| P22087   | FBL      | 0.238  | fibrillarin                                       |
| Q8WUP2-2 | FBLIM1   | 0.332  | filamin binding LIM protein 1                     |
| Q8N531-1 | FBXL6    | 0.358  | F-box and leucine rich repeat protein 6           |
| Q8TB52   | FBXO30   | 0.368  | F-box protein 30                                  |
| Q6PIJ6-1 | FBXO38   | 0.233  | F-box protein 38                                  |
| O94868   | FCHSD2   | -0.431 | FCH and double SH3 domains 2                      |
| P37268   | FDFT1    | -0.246 | farnesyl-diphosphate farnesyltransferase 1        |
| P14324   | FDPS     | -0.216 | farnesyl diphosphate synthase                     |
| P22570-7 | FDXR     | 0.472  | ferredoxin reductase                              |
| P22830-2 | FECH     | 0.415  | ferrochelataase                                   |
| P39748   | FEN1     | 0.086  | flap structure-specific endonuclease 1            |
| P02671-1 | FGA      | -0.65  | fibrinogen alpha chain                            |
| P02671-2 | FGA      | -0.695 | fibrinogen alpha chain                            |
| P02675   | FGB      | -0.242 | fibrinogen beta chain                             |
| O95684   | FGFR1OP  | -0.248 | FGFR1 oncogene partner                            |
| P22455-1 | FGFR4    | -0.606 | fibroblast growth factor receptor 4               |
| P02679   | FGG      | -0.429 | fibrinogen gamma chain                            |

|           |           |        |                                                        |
|-----------|-----------|--------|--------------------------------------------------------|
| Q13643    | FHL3      | 0.709  | four and a half LIM domains 3                          |
| Q9Y613    | FHOD1     | -0.236 | formin homology 2 domain containing 1                  |
| O43427    | FIBP      | -0.404 | FGF1 intracellular binding protein                     |
| Q9NWM8    | FKBP14    | -0.432 | FKBP prolyl isomerase 14                               |
| P62942    | FKBP1A    | -0.33  | FKBP prolyl isomerase 1A                               |
| Q00688    | FKBP3     | -0.161 | FKBP prolyl isomerase 3                                |
| Q02790    | FKBP4     | 0.201  | FKBP prolyl isomerase 4                                |
| Q14318-2  | FKBP8     | 0.118  | FKBP prolyl isomerase 8                                |
| O95302-3  | FKBP9     | 0.147  | FKBP prolyl isomerase 9                                |
| P21333    | FLNA      | -0.164 | filamin A                                              |
| O75369-8  | FLNB      | -0.313 | filamin B                                              |
| Q9Y5Y0    | FLVCR1    | -0.403 | feline leukemia virus subgroup C cellular receptor 1   |
| Q96CP2    | FLYWCH2   | -0.36  | FLYWCH family member 2                                 |
| Q96PY5-3  | FMNL2     | -0.136 | formin like 2                                          |
| P02751-15 | FN1       | -0.635 | fibronectin 1                                          |
| Q9H479    | FN3K      | -0.129 | fructosamine 3 kinase                                  |
| Q96RU3-1  | FNBP1     | -0.564 | formin binding protein 1                               |
| Q5T0N5-1  | FNBP1L    | -0.188 | formin binding protein 1 like                          |
| Q8N3X1-2  | FNBP4     | -0.221 | formin binding protein 4                               |
| Q9Y2H6    | FNDC3A    | 0.242  | fibronectin type III domain containing 3A              |
| Q53EP0    | FNDC3B    | -0.504 | fibronectin type III domain containing 3B              |
| P49354    | FNTA      | -0.235 | farnesyltransferase, CAAX box, alpha                   |
| Q5VW36    | FOCAD     | -0.32  | focadhesin                                             |
| P15407    | FOSL1     | 1.38   | FOS like 1, AP-1 transcription factor subunit          |
| P85037    | FOXK1     | 0.226  | forkhead box K1                                        |
| Q8IWF2    | FOXRED2   | -0.27  | FAD dependent oxidoreductase domain containing 2       |
| Q86XX4-2  | FRAS1     | -1.124 | Fraser extracellular matrix complex subunit 1          |
| Q14331    | FRG1      | 0.187  | FSHD region gene 1                                     |
| Q9BZ67    | FRMD8     | 0.215  | FERM domain containing 8                               |
| O95954-1  | FTCD      | -0.285 | formimidoyltransferase cyclodeaminase                  |
| P02794    | FTH1      | 0.377  | ferritin heavy chain 1                                 |
| P02792    | FTL       | 0.761  | ferritin light chain                                   |
| Q9C0B1-1  | FTO       | -0.463 | FTO alpha-ketoglutarate dependent dioxygenase          |
| Q96AE4    | FUBP1     | -0.217 | far upstream element binding protein 1                 |
| Q9BTY2    | FUCA2     | 0.092  | alpha-L-fucosidase 2                                   |
| P09958    | FURIN     | -0.4   | furin, paired basic amino acid cleaving enzyme         |
| P51114    | FXR1      | 0.136  | FMR1 autosomal homolog 1                               |
| P51116    | FXR2      | 0.22   | FMR1 autosomal homolog 2                               |
| Q9BQS8-4  | FYCO1     | -0.297 | FYVE and coiled-coil domain containing 1               |
| Q13283    | G3BP1     | -0.189 | G3BP stress granule assembly factor 1                  |
| P11413-2  | G6PD      | -0.114 | glucose-6-phosphate dehydrogenase                      |
| O95166    | GABARAP   | -0.254 | GABA type A receptor-associated protein                |
| P60520    | GABARAPL2 | 0.181  | GABA type A receptor associated protein like 2         |
| Q06546    | GABPA     | -0.198 | GA binding protein transcription factor subunit alpha  |
| Q06547    | GABPB1    | 0.247  | GA binding protein transcription factor subunit beta 1 |
| O14976    | GAK       | -0.177 | cyclin G associated kinase                             |
| Q14376    | GALE      | -0.45  | UDP-galactose-4-epimerase                              |

|          |         |        |                                                                                       |
|----------|---------|--------|---------------------------------------------------------------------------------------|
| P51570-2 | GALK1   | -0.147 | galactokinase 1                                                                       |
| Q96C23   | GALM    | -0.479 | galactose mutarotase                                                                  |
| P34059   | GALNS   | -0.134 | galactosamine (N-acetyl)-6-sulfatase                                                  |
| Q10472   | GALNT1  | 0.167  | polypeptide N-acetylgalactosaminyltransferase 1                                       |
| P07902   | GALT    | -0.206 | galactose-1-phosphate uridylyltransferase                                             |
| Q14353   | GAMT    | -0.258 | guanidinoacetate N-methyltransferase                                                  |
| P04406   | GAPDH   | -0.187 | glyceraldehyde-3-phosphate dehydrogenase                                              |
| Q9NY12   | GAR1    | 0.274  | GAR1 ribonucleoprotein                                                                |
| P22102   | GART    | -0.167 | phosphoribosylglycinamide formyltransferase, phosphoribosylglycinamide synthetase, ph |
| O43903   | GAS2    | -0.215 | growth arrest specific 2                                                              |
| Q86YP4-3 | GATAD2A | 0.102  | GATA zinc finger domain containing 2A                                                 |
| P04062   | GBA     | 0.145  | glucosylceramidase beta                                                               |
| Q04446   | GBE1    | -0.171 | 1,4-alpha-glucan branching enzyme 1                                                   |
| Q92538   | GBF1    | -0.189 | golgi brefeldin A resistant guanine nucleotide exchange factor 1                      |
| P28676   | GCA     | -0.352 | grancalcin                                                                            |
| Q96CN9   | GCC1    | 0.324  | GRIP and coiled-coil domain containing 1                                              |
| Q8IWJ2   | GCC2    | 0.131  | GRIP and coiled-coil domain containing 2                                              |
| Q92947-1 | GCDH    | 0.183  | glutaryl-CoA dehydrogenase                                                            |
| P16383   | GCFC2   | -0.104 | GC-rich sequence DNA-binding factor 2                                                 |
| P30793-1 | GCH1    | 0.365  | GTP cyclohydrolase 1                                                                  |
| P48506   | GCLC    | 0.189  | glutamate-cysteine ligase catalytic subunit                                           |
| P48507   | GCLM    | 1.098  | glutamate-cysteine ligase modifier subunit                                            |
| Q92616   | GCN1    | -0.167 | GCN1 activator of EIF2AK4                                                             |
| Q8TB36   | GDAP1   | 0.582  | ganglioside induced differentiation associated protein 1                              |
| Q9NZC3   | GDE1    | 0.326  | glycerophosphodiester phosphodiesterase 1                                             |
| Q99988   | GDF15   | 1.155  | growth differentiation factor 15                                                      |
| P31150   | GDI1    | 0.167  | GDP dissociation inhibitor 1                                                          |
| P50395-1 | GDI2    | -0.26  | GDP dissociation inhibitor 2                                                          |
| Q8TEQ6   | GEMINS5 | -0.082 | gem nuclear organelle associated protein 5                                            |
| Q7L5D6   | GET4    | -0.294 | guided entry of tail-anchored proteins factor 4                                       |
| Q969S9   | GFM2    | 0.185  | G elongation factor mitochondrial 2                                                   |
| Q06210   | GFPT1   | -0.173 | glutamine-fructose-6-phosphate transaminase 1                                         |
| Q9UJY5-6 | GGA1    | -0.353 | golgi associated, gamma adaptin ear containing, ARF binding protein 1                 |
| Q9NZ52   | GGA3    | -0.107 | golgi associated, gamma adaptin ear containing, ARF binding protein 3                 |
| O75223   | GGCT    | -0.333 | gamma-glutamylcyclotransferase                                                        |
| P19440   | GGT1    | -0.133 | gamma-glutamyltransferase 1                                                           |
| Q9UJ14   | GGT7    | -0.257 | gamma-glutamyltransferase 7                                                           |
| Q9H3K2   | GHITM   | 0.369  | growth hormone inducible transmembrane protein                                        |
| Q6Y7W6-1 | GIGYF2  | -0.238 | GRB10 interacting GYF protein 2                                                       |
| Q9BRX5   | GINS3   | -0.414 | GINS complex subunit 3                                                                |
| O14908-1 | GIPC1   | -0.106 | GIPC PDZ domain containing family member 1                                            |
| Q8TF65   | GIPC2   | -0.109 | GIPC PDZ domain containing family member 2                                            |
| Q9Y2X7-3 | GIT1    | 0.167  | GIT ArfGAP 1                                                                          |
| Q14161-1 | GIT2    | -0.166 | GIT ArfGAP 2                                                                          |
| P08034   | GJB1    | -0.803 | gap junction protein beta 1                                                           |
| P06280   | GLA     | 0.604  | galactosidase alpha                                                                   |
| P23378   | GLDC    | 0.133  | glycine decarboxylase                                                                 |

|          |         |        |                                                     |
|----------|---------|--------|-----------------------------------------------------|
| Q53GS7-1 | GLE1    | 0.135  | GLE1 RNA export mediator                            |
| Q92896-2 | GLG1    | -0.476 | golgi glycoprotein 1                                |
| Q92990   | GLMN    | -0.189 | glomulin, FKBP associated protein                   |
| Q9HC38   | GLOD4   | -0.219 | glyoxalase domain containing 4                      |
| O76003   | GLRX3   | -0.2   | glutaredoxin 3                                      |
| O94925   | GLS     | 1.065  | glutaminase                                         |
| O94925-3 | GLS     | 0.451  | glutaminase                                         |
| Q68CQ7-1 | GLT8D1  | -0.139 | glycosyltransferase 8 domain containing 1           |
| P00367   | GLUD1   | 0.267  | glutamate dehydrogenase 1                           |
| Q49A26   | GLYR1   | 0.264  | glyoxylate reductase 1 homolog                      |
| O60547   | GMDS    | -0.309 | GDP-mannose 4,6-dehydratase                         |
| Q9UKD1   | GMEB2   | 0.239  | glucocorticoid modulatory element binding protein 2 |
| P60983   | GMFB    | -0.183 | glia maturation factor beta                         |
| O75496   | GMNN    | 0.18   | geminin DNA replication inhibitor                   |
| Q96IJ6   | GMPPA   | -0.209 | GDP-mannose pyrophosphorylase A                     |
| Q9Y5P6-2 | GMPPB   | -0.52  | GDP-mannose pyrophosphorylase B                     |
| Q9P2T1   | GMPR2   | -0.19  | guanosine monophosphate reductase 2                 |
| P49915   | GMPS    | -0.201 | guanine monophosphate synthase                      |
| P29992   | GNA11   | 0.14   | G protein subunit alpha 11                          |
| Q14344   | GNA13   | 0.464  | G protein subunit alpha 13                          |
| P04899   | GNAI2   | 0.275  | G protein subunit alpha i2                          |
| P08754   | GNAI3   | 0.187  | G protein subunit alpha i3                          |
| P50148   | GNAQ    | -0.336 | G protein subunit alpha q                           |
| P62873   | GNB1    | 0.134  | G protein subunit beta 1                            |
| P36915   | GNL1    | 0.156  | G protein nucleolar 1 (putative)                    |
| Q9BVP2   | GNL3    | -0.552 | G protein nucleolar 3                               |
| P46926   | GNPDA1  | -0.093 | glucosamine-6-phosphate deaminase 1                 |
| Q96EK6   | GNPNAT1 | -0.186 | glucosamine-phosphate N-acetyltransferase 1         |
| Q08379   | GOLGA2  | 0.136  | golgin A2                                           |
| Q08378   | GOLGA3  | -0.21  | golgin A3                                           |
| Q13439-5 | GOLGA4  | -0.148 | golgin A4                                           |
| Q7Z5G4   | GOLGA7  | 0.236  | golgin A7                                           |
| Q9H4A6   | GOLPH3  | -0.203 | golgi phosphoprotein 3                              |
| Q9H4A5   | GOLPH3L | -0.125 | golgi phosphoprotein 3 like                         |
| Q9Y3E0   | GOLT1B  | 0.481  | golgi transport 1B                                  |
| Q9H8Y8   | GORASP2 | -0.266 | golgi reassembly stacking protein 2                 |
| O14653-2 | GOSR2   | 0.254  | golgi SNAP receptor complex member 2                |
| P00505   | GOT2    | 0.402  | glutamic-oxaloacetic transaminase 2                 |
| Q8IXQ4   | GPALPP1 | -0.131 | GPALPP motifs containing 1                          |
| Q53EU6   | GPAT3   | 0.424  | glycerol-3-phosphate acyltransferase 3              |
| Q5T3I0-3 | GPATCH4 | -0.334 | G-patch domain containing 4                         |
| Q9UKJ3-1 | GPATCH8 | -0.161 | G-patch domain containing 8                         |
| P35052   | GPC1    | 0.254  | glypican 1                                          |
| P51654-1 | GPC3    | -0.386 | glypican 3                                          |
| Q9Y625   | GPC6    | -0.582 | glypican 6                                          |
| P21695   | GPD1    | -0.384 | glycerol-3-phosphate dehydrogenase 1                |
| Q9NQX3-2 | GPHN    | -0.531 | gephyrin                                            |

|          |         |        |                                                                               |
|----------|---------|--------|-------------------------------------------------------------------------------|
| P06744   | GPI     | -0.22  | glucose-6-phosphate isomerase                                                 |
| Q9NQ84-2 | GPRC5C  | 0.15   | G protein-coupled receptor class C group 5 member C                           |
| P18283   | GPX2    | -0.354 | glutathione peroxidase 2                                                      |
| P36969   | GPX4    | -0.62  | glutathione peroxidase 4                                                      |
| Q14451-3 | GRB7    | -0.106 | growth factor receptor bound protein 7                                        |
| Q9UBQ7   | GRHPR   | -0.14  | glyoxylate and hydroxypyruvate reductase                                      |
| P25098   | GRK2    | -0.121 | G protein-coupled receptor kinase 2                                           |
| Q9HAV7   | GRPEL1  | 0.227  | GrpE like 1, mitochondrial                                                    |
| Q12849   | GRSF1   | 0.111  | G-rich RNA sequence binding factor 1                                          |
| Q14687   | GSE1    | -0.181 | Gse1 coiled-coil protein                                                      |
| P00390   | GSR     | -0.092 | glutathione-disulfide reductase                                               |
| P48637   | GSS     | -0.216 | glutathione synthetase                                                        |
| P08263   | GSTA1   | -0.468 | glutathione S-transferase alpha 1                                             |
| Q9Y2Q3-1 | GSTK1   | 0.246  | glutathione S-transferase kappa 1                                             |
| P21266   | GSTM3   | -0.208 | glutathione S-transferase mu 3                                                |
| P78417   | GSTO1   | -0.414 | glutathione S-transferase omega 1                                             |
| P30711   | GSTT1   | -0.215 | glutathione S-transferase theta 1                                             |
| Q00403   | GTF2B   | 0.415  | general transcription factor IIB                                              |
| P35269   | GTF2F1  | -0.259 | general transcription factor IIF subunit 1                                    |
| P13984   | GTF2F2  | -0.173 | general transcription factor IIF subunit 2                                    |
| Q13889   | GTF2H3  | 0.487  | general transcription factor IIH subunit 3                                    |
| Q92759   | GTF2H4  | 0.15   | general transcription factor IIH subunit 4                                    |
| P78347   | GTF2I   | -0.186 | general transcription factor Iii                                              |
| Q12789   | GTF3C1  | 0.093  | general transcription factor IIIC subunit 1                                   |
| Q9UKN8   | GTF3C4  | 0.091  | general transcription factor IIIC subunit 4                                   |
| Q9Y5Q8-1 | GTF3C5  | 0.26   | general transcription factor IIIC subunit 5                                   |
| A4D1E9   | GTPBP10 | 0.306  | GTP binding protein 10                                                        |
| Q969Y2-2 | GTPBP3  | 0.134  | GTP binding protein 3, mitochondrial                                          |
| Q9NYZ3   | GTSE1   | 0.388  | G2 and S-phase expressed 1                                                    |
| Q8N442   | GUF1    | 0.281  | GUF1 homolog, GTPase                                                          |
| Q4G148   | GXYLT1  | 0.249  | glucoside xylosyltransferase 1                                                |
| Q9H116   | GZF1    | 0.227  | GDNF inducible zinc finger protein 1                                          |
| P07305   | H1-0    | 1.066  | H1.0 linker histone                                                           |
| P16401   | H1-5    | 0.876  | H1.5 linker histone, cluster member                                           |
| P16104   | H2AX    | 0.377  | H2A.X variant histone                                                         |
| P0C0S5   | H2AZ1   | 0.771  | H2A.Z variant histone 1                                                       |
| O95479   | H6PD    | -0.141 | hexose-6-phosphate dehydrogenase/glucose 1-dehydrogenase                      |
| P46952   | HAAO    | -0.208 | 3-hydroxyanthranilate 3,4-dioxygenase                                         |
| Q5JVS0   | HABP4   | -0.292 | hyaluronan binding protein 4                                                  |
| Q6Y1H2   | HACD2   | 0.395  | 3-hydroxyacyl-CoA dehydratase 2                                               |
| Q9P035   | HACD3   | 0.159  | 3-hydroxyacyl-CoA dehydratase 3                                               |
| Q9UJ83   | HACL1   | 0.135  | 2-hydroxyacyl-CoA lyase 1                                                     |
| P40939   | HADHA   | 0.333  | hydroxyacyl-CoA dehydrogenase trifunctional multienzyme complex subunit alpha |
| P55084   | HADHB   | 0.319  | hydroxyacyl-CoA dehydrogenase trifunctional multienzyme complex subunit beta  |
| P12081   | HARS1   | -0.237 | histidyl-tRNA synthetase 1                                                    |
| O14929   | HAT1    | -0.08  | histone acetyltransferase 1                                                   |
| O94927   | HAUS5   | -0.202 | HAUS augmin like complex subunit 5                                            |

|          |         |        |                                                                |
|----------|---------|--------|----------------------------------------------------------------|
| Q9Y450   | HBS1L   | -0.162 | HBS1 like translational GTPase                                 |
| P53701   | HCCS    | 0.261  | holocytochrome c synthase                                      |
| Q92769   | HDAC2   | 0.122  | histone deacetylase 2                                          |
| Q7Z4H3   | HDDC2   | -0.206 | HD domain containing 2                                         |
| Q8N4P3   | HDDC3   | -0.249 | HD domain containing 3                                         |
| P51858   | HDGF    | -0.32  | heparin binding growth factor                                  |
| Q9H0R4   | HDHD2   | -0.163 | haloacid dehalogenase like hydrolase domain containing 2       |
| Q00341   | HDLBP   | -0.555 | high density lipoprotein binding protein                       |
| Q9H583   | HEATR1  | 0.202  | HEAT repeat containing 1                                       |
| Q7Z4Q2   | HEATR3  | -0.376 | HEAT repeat containing 3                                       |
| Q86XA9   | HEATR5A | -0.35  | HEAT repeat containing 5A                                      |
| Q9P2D3   | HEATR5B | -0.306 | HEAT repeat containing 5B                                      |
| Q9Y5Z4   | HEBP2   | -0.387 | heme binding protein 2                                         |
| Q9BYK8   | HELZ2   | 0.264  | helicase with zinc finger 2                                    |
| Q15011-1 | HERPUD1 | -0.686 | homocysteine inducible ER protein with ubiquitin like domain 1 |
| P07686   | HEXB    | 0.16   | hexosaminidase subunit beta                                    |
| Q96MH2   | HEXIM2  | -0.25  | HEXIM P-TEFb complex subunit 2                                 |
| Q93099   | HGD     | -0.177 | homogentisate 1,2-dioxygenase                                  |
| Q9BTY7   | HGH1    | -0.146 | HGH1 homolog                                                   |
| P31937   | HIBADH  | 0.275  | 3-hydroxyisobutyrate dehydrogenase                             |
| Q6NVY1   | HIBCH   | 0.155  | 3-hydroxyisobutyryl-CoA hydrolase                              |
| Q9NWT6   | HIF1AN  | -0.281 | hypoxia inducible factor 1 subunit alpha inhibitor             |
| P49773   | HINT1   | -0.096 | histidine triad nucleotide binding protein 1                   |
| Q9BX68   | HINT2   | 0.42   | histidine triad nucleotide binding protein 2                   |
| Q9NQE9   | HINT3   | -0.154 | histidine triad nucleotide binding protein 3                   |
| Q9BW71-1 | HIRIP3  | -0.192 | HIRA interacting protein 3                                     |
| P52789   | HK2     | -0.147 | hexokinase 2                                                   |
| Q2TB90-1 | HKDC1   | 0.24   | hexokinase domain containing 1                                 |
| P01892   | HLA-A   | 0.356  | major histocompatibility complex, class I, A                   |
| P05534   | HLA-A   | 0.389  | major histocompatibility complex, class I, A                   |
| Q14527   | HLTF    | -0.356 | helicase like transcription factor                             |
| P08397   | HMBS    | -0.298 | hydroxymethylbilane synthase                                   |
| Q96FZ2   | HMCE5   | -0.221 | 5-hydroxymethylcytosine binding, ES cell specific              |
| P17096-1 | HMGA1   | 0.419  | high mobility group AT-hook 1                                  |
| P52926-1 | HMGA2   | 0.401  | high mobility group AT-hook 2                                  |
| P09429   | HMGB1   | 0.199  | high mobility group box 1                                      |
| P35914   | HMGCL   | 0.218  | 3-hydroxy-3-methylglutaryl-CoA lyase                           |
| Q01581   | HMGCS1  | -0.494 | 3-hydroxy-3-methylglutaryl-CoA synthase 1                      |
| P05114   | HMGN1   | 0.317  | high mobility group nucleosome binding domain 1                |
| P05204   | HMGN2   | 0.991  | high mobility group nucleosomal binding domain 2               |
| Q9UGU5   | HMGXB4  | 0.234  | HMG-box containing 4                                           |
| O75330-3 | HMMR    | 0.437  | hyaluronan mediated motility receptor                          |
| P09601   | HMOX1   | 1.422  | heme oxygenase 1                                               |
| P30519   | HMOX2   | 0.159  | heme oxygenase 2                                               |
| P20823-7 | HNF1A   | -0.236 | HNF1 homeobox A                                                |
| P41235-4 | HNF4A   | -0.58  | hepatocyte nuclear factor 4 alpha                              |
| P50135   | HNMT    | -0.327 | histamine N-methyltransferase                                  |

|          |               |        |                                                                   |
|----------|---------------|--------|-------------------------------------------------------------------|
| Q13151   | HNRNPA0       | 0.226  | heterogeneous nuclear ribonucleoprotein A0                        |
| Q14103-3 | HNRNPD        | -0.184 | heterogeneous nuclear ribonucleoprotein D                         |
| O14979-1 | HNRNPDL       | -0.227 | heterogeneous nuclear ribonucleoprotein D like                    |
| P55795   | HNRNPH2       | 0.181  | heterogeneous nuclear ribonucleoprotein H2                        |
| P14866   | HNRNPL        | 0.16   | heterogeneous nuclear ribonucleoprotein L                         |
| Q00839   | HNRNPU        | 0.235  | heterogeneous nuclear ribonucleoprotein U                         |
| Q9NSC5   | HOMER3        | -0.191 | homer scaffold protein 3                                          |
| Q9UJC3   | HOOK1         | -0.228 | hook microtubule tethering protein 1                              |
| P00738   | HP            | -0.722 | haptoglobin                                                       |
| Q5SSJ5   | HP1BP3        | 0.474  | heterochromatin protein 1 binding protein 3                       |
| P37235   | HPCAL1        | -0.325 | hippocalcin like 1                                                |
| P32754-1 | HPD           | -0.314 | 4-hydroxyphenylpyruvate dioxygenase                               |
| Q9NWY4   | HPF1          | -0.223 | histone PARylation factor 1                                       |
| P00492   | HPRT1         | -0.144 | hypoxanthine phosphoribosyltransferase 1                          |
| O75506   | HSBP1         | -0.346 | heat shock factor binding protein 1                               |
| Q8IWL3   | HSCB          | 0.202  | HscB mitochondrial iron-sulfur cluster cochaperone                |
| Q99714-1 | HSD17B10      | 0.18   | hydroxysteroid 17-beta dehydrogenase 10                           |
| Q53GQ0   | HSD17B12      | 0.158  | hydroxysteroid 17-beta dehydrogenase 12                           |
| P51659-1 | HSD17B4       | 0.232  | hydroxysteroid 17-beta dehydrogenase 4                            |
| Q3SXM5   | HSDL1         | 0.268  | hydroxysteroid dehydrogenase like 1                               |
| Q6YN16   | HSDL2         | 0.177  | hydroxysteroid dehydrogenase like 2                               |
| P07900   | HSP90AA1      | 0.197  | heat shock protein 90 alpha family class A member 1               |
| P08238   | HSP90AB1      | 0.133  | heat shock protein 90 alpha family class B member 1               |
| P14625   | HSP90B1       | 0.27   | heat shock protein 90 beta family member 1                        |
| P48723   | HSPA13        | 0.184  | heat shock protein family A (Hsp70) member 13                     |
| Q0VDF9   | HSPA14        | -0.197 | heat shock protein family A (Hsp70) member 14                     |
| P0DMV9   | HSPA1A/HSPA1B | 1.605  | heat shock protein family A (Hsp70) member 1A                     |
| O95757   | HSPA4L        | 0.137  | heat shock protein family A (Hsp70) member 4 like                 |
| P17066   | HSPA6         | 2.196  | heat shock protein family A (Hsp70) member 6                      |
| P38646   | HSPA9         | 0.294  | heat shock protein family A (Hsp70) member 9                      |
| P04792   | HSPB1         | 0.996  | heat shock protein family B (small) member 1                      |
| Q9NZL4-3 | HSPBP1        | -0.252 | HSPA (Hsp70) binding protein 1                                    |
| P10809   | HSPD1         | 0.364  | heat shock protein family D (Hsp60) member 1                      |
| P61604   | HSPE1         | 0.572  | heat shock protein family E (Hsp10) member 1                      |
| Q92598   | HSPH1         | 0.838  | heat shock protein family H (Hsp110) member 1                     |
| P42858   | HTT           | -0.355 | huntingtin                                                        |
| Q7Z6Z7   | HUWE1         | -0.246 | HECT, UBA and WWE domain containing E3 ubiquitin protein ligase 1 |
| Q9NX55-2 | HYPK          | -0.168 | huntingtin interacting protein K                                  |
| Q2TAA2   | IAH1          | -0.136 | isoamyl acetate hydrolyzing esterase 1 (putative)                 |
| P41252   | IARS1         | -0.125 | isoleucyl-tRNA synthetase 1                                       |
| Q9NSE4   | IARS2         | 0.349  | isoleucyl-tRNA synthetase 2, mitochondrial                        |
| Q5T440   | IBA57         | 0.341  | iron-sulfur cluster assembly factor IBA57                         |
| Q9P2D0   | IBTK          | -0.227 | inhibitor of Bruton tyrosine kinase                               |
| P14735   | IDE           | -0.192 | insulin degrading enzyme                                          |
| O75874   | IDH1          | -0.332 | isocitrate dehydrogenase (NADP(+)) 1                              |
| P48735   | IDH2          | 0.275  | isocitrate dehydrogenase (NADP(+)) 2                              |
| P50213   | IDH3A         | 0.202  | isocitrate dehydrogenase (NAD(+)) 3 catalytic subunit alpha       |

|                 |         |        |                                                                     |
|-----------------|---------|--------|---------------------------------------------------------------------|
| <b>O43837</b>   | IDH3B   | 0.232  | isocitrate dehydrogenase (NAD(+)) 3 non-catalytic subunit beta      |
| <b>P51553-1</b> | IDH3G   | 0.282  | isocitrate dehydrogenase (NAD(+)) 3 non-catalytic subunit gamma     |
| <b>Q13907</b>   | IDI1    | -0.17  | isopentenyl-diphosphate delta isomerase 1                           |
| <b>Q9BYX4-1</b> | IFIH1   | -0.344 | interferon induced with helicase C domain 1                         |
| <b>O00425</b>   | IGF2BP3 | -0.098 | insulin like growth factor 2 mRNA binding protein 3                 |
| <b>P11717</b>   | IGF2R   | -0.342 | insulin like growth factor 2 receptor                               |
| <b>P08833</b>   | IGFBP1  | 0.545  | insulin like growth factor binding protein 1                        |
| <b>Q8N6C5-4</b> | IGSF1   | -0.326 | immunoglobulin superfamily member 1                                 |
| <b>Q13123</b>   | IK      | 0.171  | IK cytokine                                                         |
| <b>Q70UQ0</b>   | IKBIP   | 0.27   | IKBKB interacting protein                                           |
| <b>Q70UQ0-4</b> | IKBIP   | 0.365  | IKBKB interacting protein                                           |
| <b>Q9Y6K9-2</b> | IKBKG   | 0.139  | inhibitor of nuclear factor kappa B kinase regulatory subunit gamma |
| <b>Q14116</b>   | IL18    | 0.218  | interleukin 18                                                      |
| <b>Q9NPH3</b>   | IL1RAP  | -0.207 | interleukin 1 receptor accessory protein                            |
| <b>P40189</b>   | IL6ST   | -0.307 | interleukin 6 signal transducer                                     |
| <b>Q13418</b>   | ILK     | 0.122  | integrin linked kinase                                              |
| <b>Q9H0C8</b>   | ILKAP   | -0.19  | ILK associated serine/threonine phosphatase                         |
| <b>Q9NV31</b>   | IMP3    | 0.182  | IMP U3 small nucleolar ribonucleoprotein 3                          |
| <b>Q96G21</b>   | IMP4    | 0.282  | IMP U3 small nucleolar ribonucleoprotein 4                          |
| <b>Q9NX62</b>   | IMPAD1  | 0.143  | inositol monophosphatase domain containing 1                        |
| <b>Q9NQS7</b>   | INCENP  | 0.477  | inner centromere protein                                            |
| <b>Q27J81</b>   | INF2    | -0.204 | inverted formin, FH2 and WH2 domain containing                      |
| <b>Q9UK53-1</b> | ING1    | 0.307  | inhibitor of growth family member 1                                 |
| <b>Q92835</b>   | INPP5D  | -0.343 | inositol polyphosphate-5-phosphatase D                              |
| <b>P06213</b>   | INSR    | -0.346 | insulin receptor                                                    |
| <b>Q9NVM9</b>   | INTS13  | -0.189 | integrator complex subunit 13                                       |
| <b>Q96SY0</b>   | INTS14  | -0.195 | integrator complex subunit 14                                       |
| <b>Q96HW7</b>   | INTS4   | -0.092 | integrator complex subunit 4                                        |
| <b>Q9NV88-1</b> | INTS9   | -0.121 | integrator complex subunit 9                                        |
| <b>Q9UI26-2</b> | IPO11   | -0.272 | importin 11                                                         |
| <b>Q8TEX9-2</b> | IPO4    | -0.445 | importin 4                                                          |
| <b>O00410-3</b> | IPO5    | -0.466 | importin 5                                                          |
| <b>O95373</b>   | IPO7    | -0.356 | importin 7                                                          |
| <b>Q96P70</b>   | IPO9    | -0.299 | importin 9                                                          |
| <b>P46940</b>   | IQGAP1  | -0.095 | IQ motif containing GTPase activating protein 1                     |
| <b>Q13576-1</b> | IQGAP2  | -0.253 | IQ motif containing GTPase activating protein 2                     |
| <b>Q6DN90</b>   | IQSEC1  | -0.291 | IQ motif and Sec7 domain ArfGEF 1                                   |
| <b>P48200</b>   | IREB2   | -0.149 | iron responsive element binding protein 2                           |
| <b>Q9H1B7</b>   | IRF2BPL | 0.164  | interferon regulatory factor 2 binding protein like                 |
| <b>Q14653</b>   | IRF3    | -0.184 | interferon regulatory factor 3                                      |
| <b>Q8WZA9</b>   | IRGQ    | -0.151 | immunity related GTPase Q                                           |
| <b>Q86U28</b>   | ISCA2   | -0.228 | iron-sulfur cluster assembly 2                                      |
| <b>Q9H1K1</b>   | ISCU    | 0.337  | iron-sulfur cluster assembly enzyme                                 |
| <b>P05161</b>   | ISG15   | -0.108 | ISG15 ubiquitin like modifier                                       |
| <b>Q9H9L3</b>   | ISG20L2 | -0.105 | interferon stimulated exonuclease gene 20 like 2                    |
| <b>Q96CN7</b>   | ISOC1   | -0.127 | isochorismatase domain containing 1                                 |
| <b>Q96AB3-2</b> | ISOC2   | 0.198  | isochorismatase domain containing 2                                 |

|          |           |        |                                                        |
|----------|-----------|--------|--------------------------------------------------------|
| P53990-1 | IST1      | 0.104  | IST1 factor associated with ESCRT-III                  |
| Q9ULR0-1 | ISY1      | 0.205  | ISY1 splicing factor homolog                           |
| P56199   | ITGA1     | -0.131 | integrin subunit alpha 1                               |
| P23229-1 | ITGA6     | -0.336 | integrin subunit alpha 6                               |
| P23229-6 | ITGA6     | -0.426 | integrin subunit alpha 6                               |
| P19823   | ITIH2     | -0.103 | inter-alpha-trypsin inhibitor heavy chain 2            |
| Q9NQX7   | ITM2C     | -0.166 | integral membrane protein 2C                           |
| Q9BY32   | ITPA      | -0.283 | inosine triphosphatase                                 |
| P28290   | ITPRID2   | 0.159  | ITPR interacting domain containing 2                   |
| P26440   | IVD       | 0.202  | isovaleryl-CoA dehydrogenase                           |
| Q96ST2   | IWS1      | -0.209 | interacts with SUPT6H, CTD assembly factor 1           |
| Q6IE81-1 | JADE1     | -0.184 | jade family PHD finger 1                               |
| P78504   | JAG1      | 0.114  | jagged canonical Notch ligand 1                        |
| P23458   | JAK1      | -0.342 | Janus kinase 1                                         |
| Q9UK76   | JPT1      | -0.184 | Jupiter microtubule associated homolog 1               |
| Q9UK76-2 | JPT1      | -0.353 | Jupiter microtubule associated homolog 1               |
| P17275   | JUNB      | 0.907  | JunB proto-oncogene, AP-1 transcription factor subunit |
| P14923   | JUP       | 0.081  | junction plakoglobin                                   |
| Q63ZY3-2 | KANK2     | -0.353 | KN motif and ankyrin repeat domains 2                  |
| Q15046-2 | KARS1     | -0.106 | lysyl-tRNA synthetase 1                                |
| Q9H7Z6-2 | KAT8      | -0.175 | lysine acetyltransferase 8                             |
| Q86V97   | KBTBD6    | 0.195  | kelch repeat and BTB domain containing 6               |
| Q9P0J7   | KCMF1     | 0.195  | potassium channel modulatory factor 1                  |
| Q9Y597   | KCTD3     | -0.421 | potassium channel tetramerization domain containing 3  |
| Q9NXV2   | KCTD5     | 0.349  | potassium channel tetramerization domain containing 5  |
| Q7L273   | KCTD9     | 0.351  | potassium channel tetramerization domain containing 9  |
| Q9Y2K7   | KDM2A     | 0.379  | lysine demethylase 2A                                  |
| Q9Y4C1   | KDM3A     | 0.703  | lysine demethylase 3A                                  |
| Q7LBC6-1 | KDM3B     | -0.138 | lysine demethylase 3B                                  |
| O75164   | KDM4A     | -0.309 | lysine demethylase 4A                                  |
| Q14145   | KEAP1     | 0.174  | kelch like ECH associated protein 1                    |
| Q7Z7F0-1 | KHDC4     | -0.214 | KH domain containing 4, pre-mRNA splicing factor       |
| P50053-2 | KHK       | -0.445 | ketoheokinase                                          |
| Q5T5P2-1 | KIAA1217  | -0.183 | KIAA1217                                               |
| Q9BY89-1 | KIAA1671  | -0.313 | KIAA1671                                               |
| Q9ULH0-1 | KIDINS220 | -0.249 | kinase D interacting substrate 220                     |
| Q9NQT8   | KIF13B    | -0.307 | kinesin family member 13B                              |
| Q9NS87   | KIF15     | -0.205 | kinesin family member 15                               |
| Q96L93-2 | KIF16B    | -0.296 | kinesin family member 16B                              |
| O60333-4 | KIF1B     | -0.289 | kinesin family member 1B                               |
| O43896   | KIF1C     | -0.168 | kinesin family member 1C                               |
| O95235   | KIF20A    | 0.264  | kinesin family member 20A                              |
| Q96Q89-2 | KIF20B    | 0.297  | kinesin family member 20B                              |
| Q14807   | KIF22     | 0.258  | kinesin family member 22                               |
| Q02241-1 | KIF23     | 0.175  | kinesin family member 23                               |
| O00139-2 | KIF2A     | 0.279  | kinesin family member 2A                               |
| Q99661   | KIF2C     | 0.306  | kinesin family member 2C                               |

|                 |        |        |                                                               |
|-----------------|--------|--------|---------------------------------------------------------------|
| <b>O95239-1</b> | KIF4A  | -0.11  | kinesin family member 4A                                      |
| <b>P33176</b>   | KIF5B  | -0.144 | kinesin family member 5B                                      |
| <b>Q92845</b>   | KIFAP3 | -0.31  | kinesin associated protein 3                                  |
| <b>Q9BW19</b>   | KIFC1  | 0.201  | kinesin family member C1                                      |
| <b>Q86Z14</b>   | KLB    | -0.392 | klotho beta                                                   |
| <b>Q9NSK0-3</b> | KLC4   | -0.248 | kinesin light chain 4                                         |
| <b>Q9BXX1</b>   | KLF16  | -0.213 | Kruppel like factor 16                                        |
| <b>Q9NVRO</b>   | KLHL11 | 0.359  | kelch like family member 11                                   |
| <b>Q1ED39</b>   | KNOP1  | 0.192  | lysine rich nucleolar protein 1                               |
| <b>P50748</b>   | KNTC1  | -0.216 | kinetochore associated 1                                      |
| <b>P52292</b>   | KPNA2  | 0.223  | karyopherin subunit alpha 2                                   |
| <b>O00505</b>   | KPNA3  | -0.174 | karyopherin subunit alpha 3                                   |
| <b>Q14974</b>   | KPNB1  | -0.336 | karyopherin subunit beta 1                                    |
| <b>Q8N9T8</b>   | KRI1   | 0.144  | KRI1 homolog                                                  |
| <b>Q13601</b>   | KRR1   | 0.248  | KRR1 small subunit processome component homolog               |
| <b>P05783</b>   | KRT18  | 0.181  | keratin 18                                                    |
| <b>P08727</b>   | KRT19  | 0.406  | keratin 19                                                    |
| <b>P05787-2</b> | KRT8   | 0.202  | keratin 8                                                     |
| <b>Q86UP2</b>   | KTN1   | 0.129  | kinectin 1                                                    |
| <b>Q16719</b>   | KYNU   | -0.088 | kynureninase                                                  |
| <b>Q9H9P8-1</b> | L2HGDH | 0.27   | L-2-hydroxyglutarate dehydrogenase                            |
| <b>P83111-1</b> | LACTB  | 0.408  | lactamase beta                                                |
| <b>O15230</b>   | LAMA5  | -0.52  | laminin subunit alpha 5                                       |
| <b>P55268</b>   | LAMB2  | -0.381 | laminin subunit beta 2                                        |
| <b>P11047</b>   | LAMC1  | -0.139 | laminin subunit gamma 1                                       |
| <b>P13473-3</b> | LAMP2  | -0.313 | lysosomal associated membrane protein 2                       |
| <b>O43813</b>   | LANCL1 | -0.453 | LanC like 1                                                   |
| <b>Q6PKG0-1</b> | LARP1  | -0.146 | La ribonucleoprotein domain family member 1                   |
| <b>Q659C4</b>   | LARP1B | -0.324 | La ribonucleoprotein domain family member 1B                  |
| <b>Q71RC2-4</b> | LARP4  | 0.108  | La ribonucleoprotein domain family member 4                   |
| <b>Q92615</b>   | LARP4B | 0.134  | La ribonucleoprotein domain family member 4B                  |
| <b>Q4G0J3-3</b> | LARP7  | -0.148 | La ribonucleoprotein domain family member 7                   |
| <b>Q15031</b>   | LARS2  | 0.326  | leucyl-tRNA synthetase 2, mitochondrial                       |
| <b>Q14847</b>   | LASP1  | -0.094 | LIM and SH3 protein 1                                         |
| <b>Q14739</b>   | LBR    | 0.403  | lamin B receptor                                              |
| <b>Q96JN0-3</b> | LCOR   | 0.553  | ligand dependent nuclear receptor corepressor                 |
| <b>Q9H6V9-2</b> | LDAH   | -0.267 | lipid droplet associated hydrolase                            |
| <b>P00338-3</b> | LDHA   | -0.466 | lactate dehydrogenase A                                       |
| <b>P01130</b>   | LDLR   | -0.232 | low density lipoprotein receptor                              |
| <b>Q9Y2U8</b>   | LEMD3  | 0.32   | LEM domain containing 3                                       |
| <b>Q96PV6-2</b> | LENG8  | 0.203  | leukocyte receptor cluster member 8                           |
| <b>O95202</b>   | LETM1  | 0.297  | leucine zipper and EF-hand containing transmembrane protein 1 |
| <b>P09382</b>   | LGALS1 | 0.147  | galectin 1                                                    |
| <b>P17931</b>   | LGALS3 | -0.182 | galectin 3                                                    |
| <b>O00214-2</b> | LGALS8 | 0.129  | galectin 8                                                    |
| <b>Q99538</b>   | LGMN   | 0.287  | legumain                                                      |
| <b>P18858</b>   | LIG1   | -0.268 | DNA ligase 1                                                  |

|          |           |        |                                                                    |
|----------|-----------|--------|--------------------------------------------------------------------|
| Q9NUP9   | LIN7C     | -0.134 | lin-7 homolog C, crumbs cell polarity complex component            |
| P38571   | LIPA      | -0.315 | lipase A, lysosomal acid type                                      |
| Q9BRT6   | LLPH      | -0.514 | LLP homolog, long-term synaptic facilitation factor                |
| Q9BU23-1 | LMF2      | 0.176  | lipase maturation factor 2                                         |
| Q03252   | LMNB2     | 0.163  | lamin B2                                                           |
| Q9UIQ6   | LNPEP     | -0.208 | leucyl and cystinyl aminopeptidase                                 |
| P36776   | LONP1     | 0.282  | lon peptidase 1, mitochondrial                                     |
| Q92604   | LPGAT1    | 0.155  | lysophosphatidylglycerol acyltransferase 1                         |
| Q93052   | LPP       | -0.281 | LIM domain containing preferred translocation partner in lipoma    |
| P50851-2 | LRBA      | -0.276 | LPS responsive beige-like anchor protein                           |
| Q96I18-2 | LRCH3     | -0.315 | leucine rich repeats and calponin homology domain containing 3     |
| Q5T3J3   | LRIF1     | 0.487  | ligand dependent nuclear receptor interacting factor 1             |
| Q7Z4F1   | LRP10     | 0.859  | LDL receptor related protein 10                                    |
| P42704   | LRPPRC    | 0.329  | leucine rich pentatricopeptide repeat containing                   |
| Q9H9A6   | LRRC40    | -0.181 | leucine rich repeat containing 40                                  |
| Q15345-2 | LRRC41    | 0.275  | leucine rich repeat containing 41                                  |
| Q8N1G4   | LRRC47    | -0.336 | leucine rich repeat containing 47                                  |
| Q96AG4   | LRRC59    | 0.275  | leucine rich repeat containing 59                                  |
| Q8IWT6   | LRRC8A    | 0.404  | leucine rich repeat containing 8 VRAC subunit A                    |
| Q32MZ4-3 | LRRFIP1   | -0.101 | LRR binding FLII interacting protein 1                             |
| Q9UFC0   | LRWD1     | 0.133  | leucine rich repeats and WD repeat domain containing 1             |
| Q9H089   | LSG1      | 0.284  | large 60S subunit nuclear export GTPase 1                          |
| O15116   | LSM1      | -0.103 | LSM1 homolog, mRNA degradation associated                          |
| Q9Y333   | LSM2      | -0.159 | LSM2 homolog, U6 small nuclear RNA and mRNA degradation associated |
| Q9Y4Z0   | LSM4      | 0.231  | LSM4 homolog, U6 small nuclear RNA and mRNA degradation associated |
| Q9Y4Y9   | LSM5      | -0.18  | LSM5 homolog, U6 small nuclear RNA and mRNA degradation associated |
| P48449   | LSS       | -0.152 | lanosterol synthase                                                |
| P09960-1 | LTA4H     | -0.34  | leukotriene A4 hydrolase                                           |
| O94822-3 | LTN1      | -0.166 | listerin E3 ubiquitin protein ligase 1                             |
| Q96GA3   | LTV1      | -0.245 | LTV1 ribosome biogenesis factor                                    |
| Q9NQ29   | LUC7L     | 0.231  | LUC7 like                                                          |
| Q9Y383   | LUC7L2    | 0.144  | LUC7 like 2, pre-mRNA splicing factor                              |
| Q86V48   | LUZP1     | 0.295  | leucine zipper protein 1                                           |
| O75608   | LYPLA1    | -0.124 | lysophospholipase 1                                                |
| O95372   | LYPLA2    | -0.109 | lysophospholipase 2                                                |
| Q9HD34   | LYRM4     | 0.259  | LYR motif containing 4                                             |
| Q8WZA0-2 | LZIC      | -0.371 | leucine zipper and CTNNBIP1 domain containing                      |
| Q9NQ48   | LZTFL1    | -0.472 | leucine zipper transcription factor like 1                         |
| Q9UPN3   | MACF1     | -0.287 | microtubule actin crosslinking factor 1                            |
| O75367   | MACROH2A1 | 0.552  | macroH2A.1 histone                                                 |
| Q9P0M6   | MACROH2A2 | 0.292  | macroH2A.2 histone                                                 |
| Q9Y6D9   | MAD1L1    | -0.233 | mitotic arrest deficient 1 like 1                                  |
| Q15013-3 | MAD2L1BP  | 0.509  | MAD2L1 binding protein                                             |
| Q8WXG6-4 | MADD      | 0.288  | MAP kinase activating death domain                                 |
| Q7L5Y9-1 | MAEA      | 0.132  | macrophage erythroblast attacher                                   |
| Q9ULX9   | MAFF      | 1.243  | MAF bZIP transcription factor F                                    |
| O15525   | MAFG      | 1.206  | MAF bZIP transcription factor G                                    |

|          |           |        |                                                                      |
|----------|-----------|--------|----------------------------------------------------------------------|
| Q9Y5V3-2 | MAGED1    | -0.277 | MAGE family member D1                                                |
| Q96QZ7   | MAGI1     | -0.37  | membrane associated guanylate kinase, WW and PDZ domain containing 1 |
| Q9H0U3   | MAGT1     | 0.329  | magnesium transporter 1                                              |
| Q8WWC4   | MAIP1     | 0.344  | matrix AAA peptidase interacting protein 1                           |
| Q9BXY0   | MAK16     | 0.254  | MAK16 homolog                                                        |
| Q96EH3   | MALSU1    | -0.124 | mitochondrial assembly of ribosomal large subunit 1                  |
| Q9UDY8   | MALT1     | -0.25  | MALT1 paracaspase                                                    |
| P33908   | MAN1A1    | -0.284 | mannosidase alpha class 1A member 1                                  |
| O00754   | MAN2B1    | 0.133  | mannosidase alpha class 2B member 1                                  |
| O00462   | MANBA     | -0.363 | mannosidase beta                                                     |
| P55145   | MANF      | -0.208 | mesencephalic astrocyte derived neurotrophic factor                  |
| P27338   | MAOB      | 0.229  | monoamine oxidase B                                                  |
| A6NCE7   | MAP1LC3B2 | 1.462  | microtubule associated protein 1 light chain 3 beta 2                |
| Q66K74   | MAP1S     | 0.25   | microtubule associated protein 1S                                    |
| Q02750   | MAP2K1    | -0.321 | mitogen-activated protein kinase kinase 1                            |
| P36507   | MAP2K2    | -0.128 | mitogen-activated protein kinase kinase 2                            |
| Q9NYL2   | MAP3K20   | -0.383 | mitogen-activated protein kinase kinase kinase 20                    |
| Q9Y6R4-1 | MAP3K4    | -0.399 | mitogen-activated protein kinase kinase kinase 4                     |
| P27816-1 | MAP4      | -0.417 | microtubule associated protein 4                                     |
| Q8IVH8   | MAP4K3    | -0.15  | mitogen-activated protein kinase kinase kinase kinase 3              |
| Q3KQU3   | MAP7D1    | 0.31   | MAP7 domain containing 1                                             |
| P28482   | MAPK1     | -0.349 | mitogen-activated protein kinase 1                                   |
| P27361-1 | MAPK3     | -0.156 | mitogen-activated protein kinase 3                                   |
| Q16644   | MAPKAPK3  | -0.18  | MAPK activated protein kinase 3                                      |
| Q15691   | MAPRE1    | 0.147  | microtubule associated protein RP/EB family member 1                 |
| Q5VT66-2 | MARC1     | -0.109 | mitochondrial amidoxime reducing component 1                         |
| P29966   | MARCKS    | -0.271 | myristoylated alanine rich protein kinase C substrate                |
| P49006   | MARCKSL1  | 0.178  | MARCKS like 1                                                        |
| Q96GW9   | MARS2     | 0.352  | methionyl-tRNA synthetase 2, mitochondrial                           |
| Q00266   | MAT1A     | -0.323 | methionine adenosyltransferase 1A                                    |
| Q9NZL9   | MAT2B     | -0.201 | methionine adenosyltransferase 2B                                    |
| Q7Z434   | MAVS      | -0.112 | mitochondrial antiviral signaling protein                            |
| P61244   | MAX       | -0.15  | MYC associated factor X                                              |
| P56270-2 | MAZ       | 0.213  | MYC associated zinc finger protein                                   |
| O95983-1 | MBD3      | 0.093  | methyl-CpG binding domain protein 3                                  |
| Q96N66-1 | MBOAT7    | 0.318  | membrane bound O-acyltransferase domain containing 7                 |
| P43121   | MCAM      | 0.361  | melanoma cell adhesion molecule                                      |
| Q8IVS2   | MCAT      | 0.223  | malonyl-CoA-acyl carrier protein transacylase                        |
| Q96RQ3   | MCCC1     | 0.159  | methylcrotonoyl-CoA carboxylase 1                                    |
| Q9HCC0-1 | MCCC2     | 0.182  | methylcrotonoyl-CoA carboxylase 2                                    |
| Q8NI22   | MCFD2     | -0.742 | multiple coagulation factor deficiency 2                             |
| P49736   | MCM2      | -0.266 | minichromosome maintenance complex component 2                       |
| P25205-2 | MCM3      | -0.179 | minichromosome maintenance complex component 3                       |
| P33991   | MCM4      | -0.19  | minichromosome maintenance complex component 4                       |
| P33992   | MCM5      | -0.203 | minichromosome maintenance complex component 5                       |
| Q14566   | MCM6      | -0.234 | minichromosome maintenance complex component 6                       |
| P33993-1 | MCM7      | -0.075 | minichromosome maintenance complex component 7                       |

|           |         |        |                                                                             |
|-----------|---------|--------|-----------------------------------------------------------------------------|
| Q9BTE3-1  | MCMBP   | -0.198 | minichromosome maintenance complex binding protein                          |
| C9JLW8    | MCRIP1  | -0.285 | MAPK regulated corepressor interacting protein 1                            |
| Q8NE86    | MCU     | 0.352  | mitochondrial calcium uniporter                                             |
| P40925-3  | MDH1    | -0.256 | malate dehydrogenase 1                                                      |
| P40926    | MDH2    | 0.306  | malate dehydrogenase 2                                                      |
| Q00987-11 | MDM2    | 0.55   | MDM2 proto-oncogene                                                         |
| P23368    | ME2     | 0.342  | malic enzyme 2                                                              |
| Q9HAF1-3  | MEAF6   | 0.442  | MYST/Esa1 associated factor 6                                               |
| P51608-2  | MECP2   | 0.3    | methyl-CpG binding protein 2                                                |
| Q93074-2  | MED12   | 0.15   | mediator complex subunit 12                                                 |
| O60244    | MED14   | 0.239  | mediator complex subunit 14                                                 |
| Q9NVC6    | MED17   | 0.125  | mediator complex subunit 17                                                 |
| Q71SY5-3  | MED25   | 0.183  | mediator complex subunit 25                                                 |
| Q96G25-2  | MED8    | -0.232 | mediator complex subunit 8                                                  |
| Q9Y316-3  | MEMO1   | -0.26  | mediator of cell motility 1                                                 |
| Q7L2J0-1  | MEPCE   | 0.219  | methylphosphate capping enzyme                                              |
| Q14696    | MESD    | -0.249 | mesoderm development LRP chaperone                                          |
| P08581-1  | MET     | -0.417 | MET proto-oncogene, receptor tyrosine kinase                                |
| P08581-2  | MET     | -0.472 | MET proto-oncogene, receptor tyrosine kinase                                |
| P53582    | METAP1  | -0.136 | methionyl aminopeptidase 1                                                  |
| Q9UBP6    | METTL1  | -0.231 | methyltransferase like 1                                                    |
| Q86W50-1  | METTL16 | -0.192 | methyltransferase like 16                                                   |
| Q9H7H0-3  | METTL17 | 0.169  | methyltransferase like 17                                                   |
| Q6P1Q9-1  | METTL2B | -0.142 | methyltransferase like 2B                                                   |
| Q86U44    | METTL3  | -0.179 | methyltransferase like 3                                                    |
| Q9NRN9    | METTL5  | 0.193  | methyltransferase like 5                                                    |
| B3KW44    | METTL8  | 0.307  | methyltransferase like 8                                                    |
| Q8IWA4    | MFN1    | 0.138  | mitofusin 1                                                                 |
| O95140    | MFN2    | 0.247  | mitofusin 2                                                                 |
| Q8IWI9-4  | MGA     | -0.221 | MAX dimerization protein MGA                                                |
| P26572    | MGAT1   | 0.307  | mannosyl (alpha-1,3-)-glycoprotein beta-1,2-N-acetylglucosaminyltransferase |
| Q10469    | MGAT2   | 0.16   | mannosyl (alpha-1,6-)-glycoprotein beta-1,2-N-acetylglucosaminyltransferase |
| Q9UQ53-3  | MGAT4B  | 0.425  | alpha-1,3-mannosyl-glycoprotein 4-beta-N-acetylglucosaminyltransferase B    |
| Q09328    | MGAT5   | -0.405 | alpha-1,6-mannosylglycoprotein 6-beta-N-acetylglucosaminyltransferase       |
| Q9BQP7    | MGME1   | 0.363  | mitochondrial genome maintenance exonuclease 1                              |
| P16455    | MGMT    | -0.241 | O-6-methylguanine-DNA methyltransferase                                     |
| O60291-2  | MGRN1   | -0.329 | mahogunin ring finger 1                                                     |
| P10620    | MGST1   | 0.286  | microsomal glutathione S-transferase 1                                      |
| Q99735    | MGST2   | 0.09   | microsomal glutathione S-transferase 2                                      |
| Q7RTP6    | MICAL3  | -0.399 | microtubule associated monooxygenase, calponin and LIM domain containing 3  |
| Q8N3F8    | MICALL1 | 0.216  | MICAL like 1                                                                |
| Q9NPA3    | MID1IP1 | -0.397 | MID1 interacting protein 1                                                  |
| L0R8F8    | MIEF1   | -0.148 | mitochondrial elongation factor 1                                           |
| Q9BRT3    | MIEN1   | -0.612 | migration and invasion enhancer 1                                           |
| Q8N108-12 | MIER1   | -0.302 | MIER1 transcriptional regulator                                             |
| Q9UNW1    | MINPP1  | -0.129 | multiple inositol-polyphosphate phosphatase 1                               |
| Q9NXC5-1  | MIOS    | -0.242 | meiosis regulator for oocyte development                                    |

|          |          |        |                                                          |
|----------|----------|--------|----------------------------------------------------------|
| Q99797   | MIPEP    | 0.226  | mitochondrial intermediate peptidase                     |
| Q8IVT2   | MISP     | 0.205  | mitotic spindle positioning                              |
| P46013   | MKI67    | 0.401  | marker of proliferation Ki-67                            |
| Q14165   | MLEC     | 0.262  | malectin                                                 |
| Q15773   | MLF2     | 0.418  | myeloid leukemia factor 2                                |
| P40692-1 | MLH1     | -0.154 | mutL homolog 1                                           |
| P51511   | MMP15    | -0.544 | matrix metallopeptidase 15                               |
| Q96T76-8 | MMS19    | -0.266 | MMS19 homolog, cytosolic iron-sulfur assembly component  |
| P22033   | MMUT     | 0.197  | methylmalonyl-CoA mutase                                 |
| P51948-1 | MNAT1    | 0.172  | MNAT1 component of CDK activating kinase                 |
| Q7L9L4-2 | MOB1B    | 0.094  | MOB kinase activator 1B                                  |
| Q96EN8   | MOCOS    | -0.152 | molybdenum cofactor sulfurase                            |
| O96007   | MOC52    | -0.221 | molybdenum cofactor synthesis 2                          |
| Q7Z3U7   | MON2     | -0.311 | MON2 homolog, regulator of endosome-to-Golgi trafficking |
| Q9Y6X9   | MORC2    | 0.135  | MORC family CW-type zinc finger 2                        |
| Q15014   | MORF4L2  | -0.243 | mortality factor 4 like 2                                |
| Q8NHP6   | MOSPD2   | 0.101  | motile sperm domain containing 2                         |
| Q9HCE1   | MOV10    | -0.133 | Mov10 RISC complex RNA helicase                          |
| Q9Y5U8   | MPC1     | 0.555  | mitochondrial pyruvate carrier 1                         |
| O95563   | MPC2     | 0.213  | mitochondrial pyruvate carrier 2                         |
| Q99549-2 | MPHOSPH8 | 0.302  | M-phase phosphoprotein 8                                 |
| P34949   | MPI      | -0.206 | mannose phosphate isomerase                              |
| Q8N3R9-1 | MPP5     | -0.183 | membrane palmitoylated protein 5                         |
| Q6WCQ1-2 | MPRIIP   | 0.203  | myosin phosphatase Rho interacting protein               |
| P25325-2 | MPST     | -0.134 | mercaptopyruvate sulfurtransferase                       |
| Q9Y605   | MRFAP1   | -0.345 | Morf4 family associated protein 1                        |
| Q9NV56   | MRGBP    | 0.181  | MRG domain binding protein                               |
| Q9HC36   | MRM3     | 0.451  | mitochondrial rRNA methyltransferase 3                   |
| Q9BYD6   | MRPL1    | 0.16   | mitochondrial ribosomal protein L1                       |
| Q9Y3B7-1 | MRPL11   | 0.159  | mitochondrial ribosomal protein L11                      |
| P52815   | MRPL12   | 0.214  | mitochondrial ribosomal protein L12                      |
| Q9BYD1   | MRPL13   | 0.293  | mitochondrial ribosomal protein L13                      |
| Q6P1L8   | MRPL14   | 0.363  | mitochondrial ribosomal protein L14                      |
| Q9P015   | MRPL15   | 0.362  | mitochondrial ribosomal protein L15                      |
| Q9NX20   | MRPL16   | 0.533  | mitochondrial ribosomal protein L16                      |
| Q9NRX2   | MRPL17   | 0.25   | mitochondrial ribosomal protein L17                      |
| Q9H0U6   | MRPL18   | 0.235  | mitochondrial ribosomal protein L18                      |
| P49406   | MRPL19   | 0.171  | mitochondrial ribosomal protein L19                      |
| Q5T653   | MRPL2    | 0.266  | mitochondrial ribosomal protein L2                       |
| Q9BYC9   | MRPL20   | 0.279  | mitochondrial ribosomal protein L20                      |
| Q7Z2W9   | MRPL21   | 0.434  | mitochondrial ribosomal protein L21                      |
| Q9NWU5   | MRPL22   | 0.22   | mitochondrial ribosomal protein L22                      |
| Q16540   | MRPL23   | 0.228  | mitochondrial ribosomal protein L23                      |
| Q96A35   | MRPL24   | 0.188  | mitochondrial ribosomal protein L24                      |
| Q9P0M9   | MRPL27   | 0.472  | mitochondrial ribosomal protein L27                      |
| Q13084   | MRPL28   | 0.289  | mitochondrial ribosomal protein L28                      |
| P09001   | MRPL3    | 0.244  | mitochondrial ribosomal protein L3                       |

|                 |         |        |                                           |
|-----------------|---------|--------|-------------------------------------------|
| <b>Q8TCC3-2</b> | MRPL30  | 0.41   | mitochondrial ribosomal protein L30       |
| <b>Q9BYC8</b>   | MRPL32  | -0.465 | mitochondrial ribosomal protein L32       |
| <b>Q9BZE1</b>   | MRPL37  | 0.383  | mitochondrial ribosomal protein L37       |
| <b>Q96DV4</b>   | MRPL38  | 0.363  | mitochondrial ribosomal protein L38       |
| <b>Q9NYK5</b>   | MRPL39  | 0.269  | mitochondrial ribosomal protein L39       |
| <b>Q9BYD3</b>   | MRPL4   | 0.258  | mitochondrial ribosomal protein L4        |
| <b>Q9H9J2</b>   | MRPL44  | 0.423  | mitochondrial ribosomal protein L44       |
| <b>Q9BRJ2</b>   | MRPL45  | 0.34   | mitochondrial ribosomal protein L45       |
| <b>Q13405</b>   | MRPL49  | 0.23   | mitochondrial ribosomal protein L49       |
| <b>Q4U2R6</b>   | MRPL51  | 0.433  | mitochondrial ribosomal protein L51       |
| <b>Q86TS9</b>   | MRPL52  | 0.291  | mitochondrial ribosomal protein L52       |
| <b>Q7Z7F7-2</b> | MRPL55  | 0.238  | mitochondrial ribosomal protein L55       |
| <b>Q9BQC6</b>   | MRPL57  | 0.386  | mitochondrial ribosomal protein L57       |
| <b>Q14197</b>   | MRPL58  | 0.095  | mitochondrial ribosomal protein L58       |
| <b>Q9BYD2</b>   | MRPL9   | 0.104  | mitochondrial ribosomal protein L9        |
| <b>P82912</b>   | MRPS11  | 0.213  | mitochondrial ribosomal protein S11       |
| <b>O15235</b>   | MRPS12  | 1.143  | mitochondrial ribosomal protein S12       |
| <b>O60783</b>   | MRPS14  | 0.187  | mitochondrial ribosomal protein S14       |
| <b>P82914</b>   | MRPS15  | 0.394  | mitochondrial ribosomal protein S15       |
| <b>Q9Y3D3</b>   | MRPS16  | 0.162  | mitochondrial ribosomal protein S16       |
| <b>Q9NVS2</b>   | MRPS18A | 0.422  | mitochondrial ribosomal protein S18A      |
| <b>Q9Y399</b>   | MRPS2   | 0.381  | mitochondrial ribosomal protein S2        |
| <b>P82921</b>   | MRPS21  | 0.353  | mitochondrial ribosomal protein S21       |
| <b>P82650</b>   | MRPS22  | 0.114  | mitochondrial ribosomal protein S22       |
| <b>Q96EL2</b>   | MRPS24  | 0.622  | mitochondrial ribosomal protein S24       |
| <b>P82663</b>   | MRPS25  | 0.213  | mitochondrial ribosomal protein S25       |
| <b>Q9BYN8</b>   | MRPS26  | 0.255  | mitochondrial ribosomal protein S26       |
| <b>Q9NP92</b>   | MRPS30  | 0.304  | mitochondrial ribosomal protein S30       |
| <b>Q92665</b>   | MRPS31  | 0.171  | mitochondrial ribosomal protein S31       |
| <b>Q9Y291</b>   | MRPS33  | 0.616  | mitochondrial ribosomal protein S33       |
| <b>P82930</b>   | MRPS34  | 0.144  | mitochondrial ribosomal protein S34       |
| <b>P82673</b>   | MRPS35  | 0.368  | mitochondrial ribosomal protein S35       |
| <b>P82909</b>   | MRPS36  | 0.177  | mitochondrial ribosomal protein S36       |
| <b>P82675</b>   | MRPS5   | 0.432  | mitochondrial ribosomal protein S5        |
| <b>P82932</b>   | MRPS6   | 0.493  | mitochondrial ribosomal protein S6        |
| <b>Q9Y2R9</b>   | MRPS7   | 0.312  | mitochondrial ribosomal protein S7        |
| <b>P82933</b>   | MRPS9   | 0.437  | mitochondrial ribosomal protein S9        |
| <b>Q96E11</b>   | MRRF    | 0.129  | mitochondrial ribosome recycling factor   |
| <b>Q9ULH7-5</b> | MRTFB   | -0.339 | myocardin related transcription factor B  |
| <b>P43246</b>   | MSH2    | -0.274 | mutS homolog 2                            |
| <b>P52701</b>   | MSH6    | -0.123 | mutS homolog 6                            |
| <b>Q96DH6-1</b> | MSI2    | -0.361 | musashi RNA binding protein 2             |
| <b>P03928</b>   | MT-ATP8 | 0.35   | ATP synthase FO subunit 8                 |
| <b>P03915</b>   | MT-ND5  | 0.527  | NADH dehydrogenase, subunit 5 (complex I) |
| <b>P07438</b>   | MT1B    | 2.98   | metallothionein 1B                        |
| <b>O94776</b>   | MTA2    | 0.396  | metastasis associated 1 family member 2   |
| <b>Q13126-1</b> | MTAP    | -0.248 | methylthioadenosine phosphorylase         |

|          |         |        |                                                                                      |
|----------|---------|--------|--------------------------------------------------------------------------------------|
| Q9NZJ7   | MTCH1   | 0.339  | mitochondrial carrier 1                                                              |
| Q96E29   | MTERF3  | 0.249  | mitochondrial transcription termination factor 3                                     |
| Q9Y483   | MTF2    | 0.398  | metal response element binding transcription factor 2                                |
| Q9H019-1 | MTFR1L  | -0.155 | mitochondrial fission regulator 1 like                                               |
| P11586   | MTHFD1  | -0.297 | methylenetetrahydrofolate dehydrogenase, cyclohydrolase and formyltetrahydrofolate s |
| P13995   | MTHFD2  | 0.344  | methylenetetrahydrofolate dehydrogenase (NADP+ dependent) 2, methenyltetrahydrofo    |
| Q13496   | MTM1    | -0.338 | myotubularin 1                                                                       |
| Q13613   | MTMR1   | -0.239 | myotubularin related protein 1                                                       |
| Q9C011   | MTMR12  | -0.309 | myotubularin related protein 12                                                      |
| P42345   | MTOR    | -0.098 | mechanistic target of rapamycin kinase                                               |
| P58546   | MTPN    | -0.246 | myotrophin                                                                           |
| Q99707   | MTR     | -0.405 | 5-methyltetrahydrofolate-homocysteine methyltransferase                              |
| Q9UBK8-1 | MTRR    | -0.28  | 5-methyltetrahydrofolate-homocysteine methyltransferase reductase                    |
| Q765P7   | MTSS2   | -0.53  | MTSS I-BAR domain containing 2                                                       |
| Q13505   | MTX1    | 0.228  | metaxin 1                                                                            |
| Q5HYI7   | MTX3    | 0.359  | metaxin 3                                                                            |
| Q969V5   | MUL1    | 0.262  | mitochondrial E3 ubiquitin protein ligase 1                                          |
| P53602   | MVD     | -0.215 | mevalonate diphosphate decarboxylase                                                 |
| Q03426   | MVK     | -0.257 | mevalonate kinase                                                                    |
| P84157-2 | MXRA7   | 0.177  | matrix remodeling associated 7                                                       |
| Q9BQG0-2 | MYBBP1A | -0.213 | MYB binding protein 1a                                                               |
| Q969H8   | MYDGF   | 0.265  | myeloid derived growth factor                                                        |
| Q7Z406-2 | MYH14   | -0.178 | myosin heavy chain 14                                                                |
| P35579   | MYH9    | 0.089  | myosin heavy chain 9                                                                 |
| O14950   | MYL12B  | -0.155 | myosin light chain 12B                                                               |
| Q15746   | MYLK    | -0.19  | myosin light chain kinase                                                            |
| Q96JP2   | MYO15B  | -0.427 | myosin XVB                                                                           |
| Q92614-1 | MYO18A  | -0.211 | myosin XVIII A                                                                       |
| Q96H55-1 | MYO19   | -0.216 | myosin XIX                                                                           |
| O00159-3 | MYO1C   | 0.182  | myosin IC                                                                            |
| Q12965   | MYO1E   | -0.17  | myosin IE                                                                            |
| Q6NSJ0   | MYORG   | -0.445 | myogenesis regulating glycosidase (putative)                                         |
| P41227   | NAA10   | -0.355 | N(alpha)-acetyltransferase 10, NatA catalytic subunit                                |
| Q9BXJ9   | NAA15   | -0.105 | N(alpha)-acetyltransferase 15, NatA auxiliary subunit                                |
| P61599   | NAA20   | -0.321 | N(alpha)-acetyltransferase 20, NatB catalytic subunit                                |
| Q14CX7   | NAA25   | -0.271 | N(alpha)-acetyltransferase 25, NatB auxiliary subunit                                |
| Q15742   | NAB2    | 0.25   | NGFI-A binding protein 2                                                             |
| Q4G0N4   | NADK2   | 0.173  | NAD kinase 2, mitochondrial                                                          |
| Q6IA69   | NADSYN1 | -0.26  | NAD synthetase 1                                                                     |
| Q13564-4 | NAE1    | -0.324 | NEDD8 activating enzyme E1 subunit 1                                                 |
| Q9UJ70-2 | NAGK    | -0.213 | N-acetylglucosamine kinase                                                           |
| P43490   | NAMPT   | -0.079 | nicotinamide phosphoribosyltransferase                                               |
| Q9NR45   | NANS    | -0.221 | N-acetylneuraminase synthase                                                         |
| P55209   | NAP1L1  | -0.124 | nucleosome assembly protein 1 like 1                                                 |
| Q99733-2 | NAP1L4  | -0.126 | nucleosome assembly protein 1 like 4                                                 |
| O43776   | NARS1   | -0.21  | asparaginyl-tRNA synthetase 1                                                        |
| Q96I59   | NARS2   | 0.363  | asparaginyl-tRNA synthetase 2, mitochondrial                                         |

|          |         |        |                                                          |
|----------|---------|--------|----------------------------------------------------------|
| P49321-3 | NASP    | -0.435 | nuclear autoantigenic sperm protein                      |
| Q9H0A0   | NAT10   | 0.196  | N-acetyltransferase 10                                   |
| Q8IVL1   | NAV2    | -0.554 | neuron navigator 2                                       |
| A2RRP1   | NBAS    | -0.319 | NBAS subunit of NRZ tethering complex                    |
| Q15021   | NCAPD2  | -0.263 | non-SMC condensin I complex subunit D2                   |
| Q9BPX3   | NCAPG   | -0.22  | non-SMC condensin I complex subunit G                    |
| Q15003   | NCAPH   | -0.237 | non-SMC condensin I complex subunit H                    |
| Q09161   | NCBP1   | -0.237 | nuclear cap binding protein subunit 1                    |
| Q6PIU2-2 | NCEH1   | 0.451  | neutral cholesterol ester hydrolase 1                    |
| Q9NZQ3   | NCKIPSD | 0.146  | NCK interacting protein with SH3 domain                  |
| Q9Y6Q9   | NCOA3   | -0.277 | nuclear receptor coactivator 3                           |
| Q13772-4 | NCOA4   | 0.179  | nuclear receptor coactivator 4                           |
| Q9HCD5   | NCOA5   | 0.098  | nuclear receptor coactivator 5                           |
| O75376   | NCOR1   | -0.216 | nuclear receptor corepressor 1                           |
| Q68D85   | NCR3LG1 | -0.655 | natural killer cell cytotoxicity receptor 3 ligand 1     |
| Q92542-1 | NCSTN   | 0.109  | nicastrin                                                |
| O14777   | NDC80   | -0.223 | NDC80 kinetochore complex component                      |
| Q9NXR1-1 | NDE1    | -0.303 | nudE neurodevelopment protein 1                          |
| Q9UGV2   | NDRG3   | -0.463 | NDRG family member 3                                     |
| O95299   | NDUFA10 | 0.465  | NADH:ubiquinone oxidoreductase subunit A10               |
| Q9UI09   | NDUFA12 | 0.292  | NADH:ubiquinone oxidoreductase subunit A12               |
| Q9P0J0   | NDUFA13 | 0.437  | NADH:ubiquinone oxidoreductase subunit A13               |
| O00483   | NDUFA4  | -0.159 | NDUFA4 mitochondrial complex associated                  |
| P56556   | NDUFA6  | 0.456  | NADH:ubiquinone oxidoreductase subunit A6                |
| O95182   | NDUFA7  | 0.29   | NADH:ubiquinone oxidoreductase subunit A7                |
| P51970   | NDUFA8  | 0.29   | NADH:ubiquinone oxidoreductase subunit A8                |
| Q16795   | NDUFA9  | 0.47   | NADH:ubiquinone oxidoreductase subunit A9                |
| O14561   | NDUFAB1 | 0.385  | NADH:ubiquinone oxidoreductase subunit AB1               |
| Q8N183   | NDUFAF2 | 0.188  | NADH:ubiquinone oxidoreductase complex assembly factor 2 |
| Q9BU61-1 | NDUFAF3 | -0.142 | NADH:ubiquinone oxidoreductase complex assembly factor 3 |
| Q9P032   | NDUFAF4 | 0.172  | NADH:ubiquinone oxidoreductase complex assembly factor 4 |
| Q7L592   | NDUFAF7 | 0.312  | NADH:ubiquinone oxidoreductase complex assembly factor 7 |
| O96000   | NDUFB10 | 0.161  | NADH:ubiquinone oxidoreductase subunit B10               |
| O43676   | NDUFB3  | 0.428  | NADH:ubiquinone oxidoreductase subunit B3                |
| O95168   | NDUFB4  | 0.374  | NADH:ubiquinone oxidoreductase subunit B4                |
| O43674-1 | NDUFB5  | 0.353  | NADH:ubiquinone oxidoreductase subunit B5                |
| O95139   | NDUFB6  | 0.123  | NADH:ubiquinone oxidoreductase subunit B6                |
| P17568   | NDUFB7  | 0.287  | NADH:ubiquinone oxidoreductase subunit B7                |
| O95169   | NDUFB8  | 0.38   | NADH:ubiquinone oxidoreductase subunit B8                |
| Q9Y6M9   | NDUFB9  | 0.44   | NADH:ubiquinone oxidoreductase subunit B9                |
| O95298   | NDUFC2  | 0.4    | NADH:ubiquinone oxidoreductase subunit C2                |
| P28331-2 | NDUFS1  | 0.194  | NADH:ubiquinone oxidoreductase core subunit S1           |
| O75306   | NDUFS2  | 0.285  | NADH:ubiquinone oxidoreductase core subunit S2           |
| O75489   | NDUFS3  | 0.338  | NADH:ubiquinone oxidoreductase core subunit S3           |
| O43181   | NDUFS4  | 0.27   | NADH:ubiquinone oxidoreductase subunit S4                |
| O43920   | NDUFS5  | 0.372  | NADH:ubiquinone oxidoreductase subunit S5                |
| O75380   | NDUFS6  | 0.201  | NADH:ubiquinone oxidoreductase subunit S6                |

|                 |           |        |                                                            |
|-----------------|-----------|--------|------------------------------------------------------------|
| <b>O75251</b>   | NDUFS7    | 0.514  | NADH:ubiquinone oxidoreductase core subunit S7             |
| <b>O00217</b>   | NDUFS8    | 0.188  | NADH:ubiquinone oxidoreductase core subunit S8             |
| <b>P49821</b>   | NDUFV1    | 0.319  | NADH:ubiquinone oxidoreductase core subunit V1             |
| <b>P19404</b>   | NDUFV2    | -0.113 | NADH:ubiquinone oxidoreductase core subunit V2             |
| <b>Q92692-2</b> | NECTIN2   | -0.167 | nectin cell adhesion molecule 2                            |
| <b>Q8NHV4-3</b> | NEDD1     | 0.445  | NEDD1 gamma-tubulin ring complex targeting factor          |
| <b>P46934-4</b> | NEDD4     | -0.269 | NEDD4 E3 ubiquitin protein ligase                          |
| <b>Q15843</b>   | NEDD8     | -0.262 | NEDD8 ubiquitin like modifier                              |
| <b>Q9H3P2</b>   | NELFA     | -0.16  | negative elongation factor complex member A                |
| <b>Q6NW34</b>   | NEPRO     | 0.148  | nucleolus and neural progenitor protein                    |
| <b>P48681</b>   | NES       | -0.226 | nestin                                                     |
| <b>Q0ZGT2</b>   | NEXN      | 0.434  | nexilin F-actin binding protein                            |
| <b>O94916-4</b> | NFAT5     | 0.329  | nuclear factor of activated T cells 5                      |
| <b>P19838-2</b> | NFKB1     | -0.093 | nuclear factor kappa B subunit 1                           |
| <b>Q9Y697</b>   | NFS1      | 0.15   | NFS1 cysteine desulfurase                                  |
| <b>Q9UMS0</b>   | NFU1      | -0.271 | NFU1 iron-sulfur cluster scaffold                          |
| <b>Q6ZNB6-1</b> | NFXL1     | -0.59  | nuclear transcription factor, X-box binding like 1         |
| <b>Q8N5V2</b>   | NGEF      | -0.368 | neuronal guanine nucleotide exchange factor                |
| <b>Q96IV0</b>   | NGLY1     | -0.6   | N-glycanase 1                                              |
| <b>Q9NPE2-2</b> | NGRN      | 0.311  | neugrin, neurite outgrowth associated                      |
| <b>Q9H9Q4-1</b> | NHEJ1     | -0.502 | non-homologous end joining factor 1                        |
| <b>Q9H9Q4-2</b> | NHEJ1     | -0.382 | non-homologous end joining factor 1                        |
| <b>Q5SYE7</b>   | NHSL1     | -0.362 | NHS like 1                                                 |
| <b>P14543-1</b> | NID1      | -0.436 | nidogen 1                                                  |
| <b>Q9GZT8</b>   | NIF3L1    | -0.332 | NGG1 interacting factor 3 like 1                           |
| <b>Q9BYG3</b>   | NIFK      | -0.155 | nucleolar protein interacting with the FHA domain of MKI67 |
| <b>Q92982</b>   | NINJ1     | 0.21   | ninjurin 1                                                 |
| <b>Q9Y221</b>   | NIP7      | 0.192  | nucleolar pre-rRNA processing protein NIP7                 |
| <b>Q9BPW8</b>   | NIPSNAP1  | 0.383  | nipsnap homolog 1                                          |
| <b>O75323-1</b> | NIPSNAP2  | 0.372  | nipsnap homolog 2                                          |
| <b>Q9UFN0</b>   | NIPSNAP3A | 0.205  | nipsnap homolog 3A                                         |
| <b>Q9NQR4</b>   | NIT2      | -0.19  | nitrilase family member 2                                  |
| <b>Q8N5F7</b>   | NKAP      | 0.125  | NFKB activating protein                                    |
| <b>Q969G9</b>   | NKD1      | -0.461 | NKD inhibitor of WNT signaling pathway 1                   |
| <b>O15226-2</b> | NKRF      | 0.381  | NFKB repressing factor                                     |
| <b>P30414</b>   | NKTR      | 0.292  | natural killer cell triggering receptor                    |
| <b>Q9NVX2</b>   | NLE1      | -0.207 | notchless homolog 1                                        |
| <b>Q96D46</b>   | NMD3      | 0.335  | NMD3 ribosome export adaptor                               |
| <b>P22392-2</b> | NME2      | -0.41  | NME/NM23 nucleoside diphosphate kinase 2                   |
| <b>P30419</b>   | NMT1      | -0.346 | N-myristoyltransferase 1                                   |
| <b>Q13423</b>   | NNT       | 0.393  | nicotinamide nucleotide transhydrogenase                   |
| <b>Q8NC60</b>   | NOA1      | 0.202  | nitric oxide associated 1                                  |
| <b>Q9ULX3</b>   | NOB1      | 0.162  | NIN1 (RPN12) binding protein 1 homolog                     |
| <b>Q9Y3T9</b>   | NOC2L     | 0.335  | NOC2 like nucleolar associated transcriptional repressor   |
| <b>Q8WTT2</b>   | NOC3L     | 0.498  | NOC3 like DNA replication regulator                        |
| <b>Q9H8H0</b>   | NOL11     | 0.116  | nucleolar protein 11                                       |
| <b>Q96MY1</b>   | NOL4L     | -0.317 | nucleolar protein 4 like                                   |

|          |          |        |                                                               |
|----------|----------|--------|---------------------------------------------------------------|
| Q9UMY1   | NOL7     | -0.375 | nucleolar protein 7                                           |
| Q76FK4   | NOL8     | 0.145  | nucleolar protein 8                                           |
| Q5C9Z4   | NOM1     | 0.336  | nucleolar protein with MIF4G domain 1                         |
| Q15233   | NONO     | 0.142  | non-POU domain containing octamer binding                     |
| Q9NPE3   | NOP10    | 0.258  | NOP10 ribonucleoprotein                                       |
| Q9Y3C1   | NOP16    | -0.471 | NOP16 nucleolar protein                                       |
| P46087-4 | NOP2     | 0.495  | NOP2 nucleolar protein                                        |
| Q9NZM5   | NOP53    | -0.567 | NOP53 ribosome biogenesis factor                              |
| O00567   | NOP56    | 0.498  | NOP56 ribonucleoprotein                                       |
| Q9Y2X3   | NOP58    | 0.414  | NOP58 ribonucleoprotein                                       |
| O75052   | NOS1AP   | -0.343 | nitric oxide synthase 1 adaptor protein                       |
| O15118   | NPC1     | 0.263  | NPC intracellular cholesterol transporter 1                   |
| P55786   | NPEPPS   | -0.259 | aminopeptidase puromycin sensitive                            |
| P10588   | NR2F6    | 0.335  | nuclear receptor subfamily 2 group F member 6                 |
| O43847-2 | NRDC     | -0.401 | nardilysin convertase                                         |
| O95478   | NSA2     | -0.65  | NSA2 ribosome biogenesis factor                               |
| O96028-1 | NSD2     | -0.273 | nuclear receptor binding SET domain protein 2                 |
| Q15738   | NSDHL    | 0.088  | NAD(P) dependent steroid dehydrogenase-like                   |
| Q9UNZ2-5 | NSFL1C   | -0.14  | NSFL1 cofactor                                                |
| Q9H0G5   | NSRP1    | -0.19  | nuclear speckle splicing regulatory protein 1                 |
| Q8TCD5   | NT5C     | -0.221 | 5', 3'-nucleotidase, cytosolic                                |
| P49902   | NT5C2    | -0.148 | 5'-nucleotidase, cytosolic II                                 |
| Q5TFE4   | NT5DC1   | -0.24  | 5'-nucleotidase domain containing 1                           |
| Q9H857-2 | NT5DC2   | 0.446  | 5'-nucleotidase domain containing 2                           |
| Q86UY8   | NT5DC3   | 0.377  | 5'-nucleotidase domain containing 3                           |
| P21589-1 | NT5E     | 0.258  | 5'-nucleotidase ecto                                          |
| P78549   | NTHL1    | -0.177 | nth like DNA glycosylase 1                                    |
| Q9BSD7   | NTPCR    | 0.235  | nucleoside-triphosphatase, cancer-related                     |
| Q8TB37   | NUBPL    | 0.283  | nucleotide binding protein like                               |
| Q9H1E3   | NUCKS1   | -0.479 | nuclear casein kinase and cyclin dependent kinase substrate 1 |
| Q9Y266   | NUDC     | -0.23  | nuclear distribution C, dynein complex regulator              |
| Q96RS6   | NUDCD1   | -0.123 | NudC domain containing 1                                      |
| Q8WVJ2   | NUDCD2   | -0.268 | NudC domain containing 2                                      |
| Q8IVD9   | NUDCD3   | -0.423 | NudC domain containing 3                                      |
| Q9NV35   | NUDT15   | -0.129 | nudix hydrolase 15                                            |
| Q96DE0   | NUDT16   | -0.115 | nudix hydrolase 16                                            |
| Q9BRJ7-1 | NUDT16L1 | 0.33   | nudix hydrolase 16 like 1                                     |
| A8MXV4   | NUDT19   | 0.494  | nudix hydrolase 19                                            |
| P50583   | NUDT2    | -0.411 | nudix hydrolase 2                                             |
| Q9UKK9   | NUDT5    | -0.327 | nudix hydrolase 5                                             |
| Q7Z417   | NUFIP2   | 0.13   | nuclear FMR1 interacting protein 2                            |
| P49757   | NUMB     | -0.209 | NUMB endocytic adaptor protein                                |
| Q8WUM0   | NUP133   | 0.095  | nucleoporin 133                                               |
| P49790   | NUP153   | 0.311  | nucleoporin 153                                               |
| Q5SRE5   | NUP188   | 0.094  | nucleoporin 188                                               |
| Q8TEM1-1 | NUP210   | 0.272  | nucleoporin 210                                               |
| Q8NFH4   | NUP37    | 0.192  | nucleoporin 37                                                |

|                 |          |        |                                                                                   |
|-----------------|----------|--------|-----------------------------------------------------------------------------------|
| <b>Q9UKX7</b>   | NUP50    | 0.13   | nucleoporin 50                                                                    |
| <b>P37198</b>   | NUP62    | -0.175 | nucleoporin 62                                                                    |
| <b>P61970</b>   | NUTF2    | -0.228 | nuclear transport factor 2                                                        |
| <b>Q9UBU9-1</b> | NXF1     | 0.315  | nuclear RNA export factor 1                                                       |
| <b>Q6DKJ4</b>   | NXN      | -0.226 | nucleoredoxin                                                                     |
| <b>Q9Y530</b>   | OARD1    | 0.097  | O-acyl-ADP-ribose deacylase 1                                                     |
| <b>P04181</b>   | OAT      | 0.549  | ornithine aminotransferase                                                        |
| <b>O75147</b>   | OBSL1    | -0.184 | obscurin like cytoskeletal adaptor 1                                              |
| <b>Q9NX40</b>   | OCIAD1   | 0.155  | OCIA domain containing 1                                                          |
| <b>Q16625</b>   | OCLN     | -0.215 | occludin                                                                          |
| <b>O60502</b>   | OGA      | 0.096  | O-GlcNAcase                                                                       |
| <b>Q02218</b>   | OGDH     | 0.365  | oxoglutarate dehydrogenase                                                        |
| <b>Q6N063-1</b> | OGFOD2   | -0.2   | 2-oxoglutarate and iron dependent oxygenase domain containing 2                   |
| <b>Q9NZT2</b>   | OGFR     | -0.186 | opioid growth factor receptor                                                     |
| <b>O15294</b>   | OGT      | -0.166 | O-linked N-acetylglucosamine (GlcNAc) transferase                                 |
| <b>Q9NTK5-1</b> | OLA1     | -0.3   | Obg like ATPase 1                                                                 |
| <b>Q9H6K4</b>   | OPA3     | 0.499  | outer mitochondrial membrane lipid metabolism regulator OPA3                      |
| <b>O14841</b>   | OPLAH    | -0.198 | 5-oxoprolinase, ATP-hydrolysing                                                   |
| <b>Q96CV9-1</b> | OPTN     | -0.82  | optineurin                                                                        |
| <b>Q13415</b>   | ORC1     | 0.744  | origin recognition complex subunit 1                                              |
| <b>Q13416</b>   | ORC2     | -0.126 | origin recognition complex subunit 2                                              |
| <b>Q9UBD5-2</b> | ORC3     | 0.179  | origin recognition complex subunit 3                                              |
| <b>O43929</b>   | ORC4     | 0.098  | origin recognition complex subunit 4                                              |
| <b>Q9Y5N6</b>   | ORC6     | 0.7    | origin recognition complex subunit 6                                              |
| <b>P19652</b>   | ORM2     | -0.376 | orosomucoid 2                                                                     |
| <b>Q9BZF1-1</b> | OSBPL8   | 0.122  | oxysterol binding protein like 8                                                  |
| <b>Q92882</b>   | OSTF1    | -0.138 | osteoclast stimulating factor 1                                                   |
| <b>Q96G74-1</b> | OTUD5    | 0.406  | OTU deubiquitinase 5                                                              |
| <b>Q6GQQ9-1</b> | OTUD7B   | 0.188  | OTU deubiquitinase 7B                                                             |
| <b>Q8N573-1</b> | OXR1     | -0.48  | oxidation resistance 1                                                            |
| <b>Q9NWU1-1</b> | OXSM     | 0.24   | 3-oxoacyl-ACP synthase, mitochondrial                                             |
| <b>O95747</b>   | OXSR1    | -0.236 | oxidative stress responsive kinase 1                                              |
| <b>P07237</b>   | P4HB     | 0.133  | prolyl 4-hydroxylase subunit beta                                                 |
| <b>Q9BRP4</b>   | PAAF1    | -0.213 | proteasomal ATPase associated factor 1                                            |
| <b>Q6VY07-2</b> | PACS1    | -0.388 | phosphofurin acidic cluster sorting protein 1                                     |
| <b>Q9UNF0</b>   | PACSIN2  | -0.204 | protein kinase C and casein kinase substrate in neurons 2                         |
| <b>Q9UKS6</b>   | PACSIN3  | -0.189 | protein kinase C and casein kinase substrate in neurons 3                         |
| <b>Q8N7H5</b>   | PAF1     | 0.251  | PAF1 homolog, Paf1/RNA polymerase II complex component                            |
| <b>P43034</b>   | PAFAH1B1 | -0.188 | platelet activating factor acetylhydrolase 1b regulatory subunit 1                |
| <b>Q15102</b>   | PAFAH1B3 | -0.268 | platelet activating factor acetylhydrolase 1b catalytic subunit 3                 |
| <b>P00439</b>   | PAH      | -0.464 | phenylalanine hydroxylase                                                         |
| <b>P22234-2</b> | PAICS    | -0.269 | phosphoribosylaminoimidazole carboxylase and phosphoribosylaminoimidazolesuccinoc |
| <b>Q9H074</b>   | PAIP1    | -0.258 | poly(A) binding protein interacting protein 1                                     |
| <b>Q9BP23</b>   | PAIP2    | 0.346  | poly(A) binding protein interacting protein 2                                     |
| <b>Q9NWT1</b>   | PAK1IP1  | 0.132  | PAK1 interacting protein 1                                                        |
| <b>Q13177</b>   | PAK2     | -0.073 | p21 (RAC1) activated kinase 2                                                     |
| <b>O96013</b>   | PAK4     | -0.153 | p21 (RAC1) activated kinase 4                                                     |

|          |         |        |                                                        |
|----------|---------|--------|--------------------------------------------------------|
| A6NDB9   | PALM3   | -0.433 | paralemmin 3                                           |
| Q9NP74   | PALMD   | -0.419 | palmdelphin                                            |
| Q9BZ23   | PANK2   | -0.113 | pantothenate kinase 2                                  |
| Q9NVE7   | PANK4   | -0.101 | pantothenate kinase 4                                  |
| P51003   | PAPOLA  | -0.123 | poly(A) polymerase alpha                               |
| O43252   | PAPSS1  | -0.18  | 3'-phosphoadenosine 5'-phosphosulfate synthase 1       |
| Q9BYG5   | PARD6B  | 0.197  | par-6 family cell polarity regulator beta              |
| Q86W56   | PARG    | -0.135 | poly(ADP-ribose) glycohydrolase                        |
| O95453   | PARN    | -0.195 | poly(A)-specific ribonuclease                          |
| P09874   | PARP1   | 0.339  | poly(ADP-ribose) polymerase 1                          |
| Q9UGN5-2 | PARP2   | 0.145  | poly(ADP-ribose) polymerase 2                          |
| Q7L3T8   | PARS2   | 0.188  | prolyl-tRNA synthetase 2, mitochondrial                |
| Q9NVD7   | PARVA   | -0.471 | parvin alpha                                           |
| Q86TB9   | PATL1   | 0.161  | PAT1 homolog 1, processing body mRNA decay factor      |
| Q9BVG4   | PBDC1   | -0.144 | polysaccharide biosynthesis domain containing 1        |
| P11498   | PC      | 0.197  | pyruvate carboxylase                                   |
| P05165-1 | PCCA    | 0.19   | propionyl-CoA carboxylase subunit alpha                |
| O94913   | PCF11   | 0.133  | PCF11 cleavage and polyadenylation factor subunit      |
| P35227   | PCGF2   | 0.306  | polycomb group ring finger 2                           |
| Q9H4Z3   | PCIF1   | -0.267 | PDX1 C-terminal inhibiting factor 1                    |
| Q16822   | PCK2    | 0.282  | phosphoenolpyruvate carboxykinase 2, mitochondrial     |
| Q15004   | PCLAF   | 0.25   | PCNA clamp associated factor                           |
| Q15154-1 | PCM1    | -0.208 | pericentriolar material 1                              |
| P12004   | PCNA    | 0.126  | proliferating cell nuclear antigen                     |
| Q8WW12   | PCNP    | -0.274 | PEST proteolytic signal containing nuclear protein     |
| Q9UKL6   | PCTP    | -0.261 | phosphatidylcholine transfer protein                   |
| P49585   | PCYT1A  | -0.198 | phosphate cytidylyltransferase 1, choline, alpha       |
| Q99447   | PCYT2   | -0.495 | phosphate cytidylyltransferase 2, ethanolamine         |
| Q13442   | PDAP1   | -0.127 | PDGFA associated protein 1                             |
| Q53EL6   | PDCD4   | -0.23  | programmed cell death 4                                |
| O14737   | PDCD5   | -0.276 | programmed cell death 5                                |
| Q8WUM4   | PDCD6IP | -0.184 | programmed cell death 6 interacting protein            |
| Q13371   | PDCL    | 0.378  | phosducin like                                         |
| Q9H2J4   | PDCL3   | -0.26  | phosducin like 3                                       |
| Q6L8Q7-1 | PDE12   | 0.137  | phosphodiesterase 12                                   |
| Q13370   | PDE3B   | -0.339 | phosphodiesterase 3B                                   |
| Q9HBH1   | PDF     | 0.334  | peptide deformylase, mitochondrial                     |
| P08559-4 | PDHA1   | 0.097  | pyruvate dehydrogenase E1 alpha 1 subunit              |
| P11177   | PDHB    | 0.185  | pyruvate dehydrogenase E1 beta subunit                 |
| O00330-1 | PDHX    | 0.227  | pyruvate dehydrogenase complex component X             |
| P30101   | PDIA3   | 0.157  | protein disulfide isomerase family A member 3          |
| Q15084-2 | PDIA6   | 0.117  | protein disulfide isomerase family A member 6          |
| Q96JY6-5 | PDLIM2  | -0.384 | PDZ and LIM domain 2                                   |
| Q9NR12   | PDLIM7  | 0.43   | PDZ and LIM domain 7                                   |
| Q9P0J1-2 | PDP1    | 0.424  | pyruvate dehydrogenase phosphatase catalytic subunit 1 |
| Q8NCN5   | PDPR    | 0.367  | pyruvate dehydrogenase phosphatase regulatory subunit  |
| Q6P996-1 | PDXDC1  | -0.345 | pyridoxal dependent decarboxylase domain containing 1  |

|          |         |        |                                                                          |
|----------|---------|--------|--------------------------------------------------------------------------|
| Q5EBL8-2 | PDZD11  | -0.121 | PDZ domain containing 11                                                 |
| Q5T2W1   | PDZK1   | -0.181 | PDZ domain containing 1                                                  |
| Q15121-2 | PEA15   | 0.337  | proliferation and apoptosis adaptor protein 15                           |
| P30086   | PEBP1   | -0.338 | phosphatidylethanolamine binding protein 1                               |
| Q9BY49-1 | PECR    | 0.298  | peroxisomal trans-2-enoyl-CoA reductase                                  |
| Q9UBV8   | PEF1    | -0.204 | penta-EF-hand domain containing 1                                        |
| Q9GZU2   | PEG3    | -0.226 | paternally expressed 3                                                   |
| Q9BRX2   | PELO    | 0.306  | pelota mRNA surveillance and ribosome rescue factor                      |
| P12955   | PEPD    | -0.375 | peptidase D                                                              |
| O15067   | PFAS    | -0.38  | phosphoribosylformylglycinamide synthase                                 |
| Q9UHV9   | PFDN2   | -0.297 | prefoldin subunit 2                                                      |
| Q99471   | PFDN5   | -0.264 | prefoldin subunit 5                                                      |
| O15212   | PFDN6   | -0.259 | prefoldin subunit 6                                                      |
| O60825   | PFKFB2  | 0.141  | 6-phosphofructo-2-kinase/fructose-2,6-biphosphatase 2                    |
| P17858-1 | PFKL    | -0.18  | phosphofructokinase, liver type                                          |
| Q01813   | PFKP    | -0.376 | phosphofructokinase, platelet                                            |
| P07737   | PFN1    | -0.278 | profilin 1                                                               |
| P35080-2 | PFN2    | -0.263 | profilin 2                                                               |
| P18669   | PGAM1   | -0.154 | phosphoglycerate mutase 1                                                |
| Q96HS1-1 | PGAM5   | 0.347  | PGAM family member 5, mitochondrial serine/threonine protein phosphatase |
| P00558   | PGK1    | -0.125 | phosphoglycerate kinase 1                                                |
| O95336   | PGLS    | -0.29  | 6-phosphogluconolactonase                                                |
| P36871-1 | PGM1    | -0.398 | phosphoglucomutase 1                                                     |
| Q96G03   | PGM2    | -0.252 | phosphoglucomutase 2                                                     |
| O95394-4 | PGM3    | -0.318 | phosphoglucomutase 3                                                     |
| A6NDG6   | PGP     | -0.409 | phosphoglycolate phosphatase                                             |
| Q9NXJ5   | PGPEP1  | -0.3   | pyroglutamyl-peptidase I                                                 |
| O00264   | PGRMC1  | 0.446  | progesterone receptor membrane component 1                               |
| O75167-4 | PHACTR2 | -0.401 | phosphatase and actin regulator 2                                        |
| Q8I221-2 | PHACTR4 | -0.29  | phosphatase and actin regulator 4                                        |
| Q9H814   | PHAX    | -0.284 | phosphorylated adaptor for RNA export                                    |
| P35232   | PHB     | 0.251  | prohibitin                                                               |
| Q99623   | PHB2    | 0.374  | prohibitin 2                                                             |
| O94880   | PHF14   | -0.146 | PHD finger protein 14                                                    |
| O75151   | PHF2    | 0.334  | PHD finger protein 2                                                     |
| A8MW92   | PHF20L1 | -0.408 | PHD finger protein 20 like 1                                             |
| Q9BUL5   | PHF23   | 0.235  | PHD finger protein 23                                                    |
| Q7RTV0   | PHF5A   | 0.243  | PHD finger protein 5A                                                    |
| Q8IWS0-1 | PHF6    | 0.113  | PHD finger protein 6                                                     |
| O43175   | PHGDH   | -0.1   | phosphoglycerate dehydrogenase                                           |
| Q8WWQ0   | PHIP    | 0.356  | pleckstrin homology domain interacting protein                           |
| P46019   | PHKA2   | -0.136 | phosphorylase kinase regulatory subunit alpha 2                          |
| Q6NSJ2-1 | PHLDB3  | 0.302  | pleckstrin homology like domain family B member 3                        |
| Q96FC7   | PHYHIPL | -0.348 | phytanoyl-CoA 2-hydroxylase interacting protein like                     |
| Q9BTU6   | PI4K2A  | 0.167  | phosphatidylinositol 4-kinase type 2 alpha                               |
| O75925-2 | PIAS1   | -0.528 | protein inhibitor of activated STAT 1                                    |
| Q5H8A4-1 | PIGG    | 0.308  | phosphatidylinositol glycan anchor biosynthesis class G                  |

|          |                 |        |                                                          |
|----------|-----------------|--------|----------------------------------------------------------|
| Q92643   | PIGK            | 0.267  | phosphatidylinositol glycan anchor biosynthesis class K  |
| Q96S52   | PIGS            | 0.13   | phosphatidylinositol glycan anchor biosynthesis class S  |
| Q969N2   | PIGT            | 0.188  | phosphatidylinositol glycan anchor biosynthesis class T  |
| Q9NWS0-1 | PIH1D1          | -0.267 | PIH1 domain containing 1                                 |
| Q9Y237-2 | PIN4            | -0.203 | peptidylprolyl cis/trans isomerase, NIMA-interacting 4   |
| Q96BK5   | PINX1           | -0.263 | PIN2 (TERF1) interacting telomerase inhibitor 1          |
| P48426   | PIP4K2A         | -0.25  | phosphatidylinositol-5-phosphate 4-kinase type 2 alpha   |
| P78356   | PIP4K2B         | -0.144 | phosphatidylinositol-5-phosphate 4-kinase type 2 beta    |
| Q99755   | PIP5K1A         | 0.171  | phosphatidylinositol-4-phosphate 5-kinase type 1 alpha   |
| O00625   | PIR             | -0.285 | pirin                                                    |
| Q9UG56-3 | PISD            | -0.123 | phosphatidylserine decarboxylase                         |
| Q00169   | PITPNA          | -0.18  | phosphatidylinositol transfer protein alpha              |
| P48739-3 | PITPNB          | -0.115 | phosphatidylinositol transfer protein beta               |
| Q5JRX3-2 | PITRM1          | 0.371  | pitrilysin metalloproteinase 1                           |
| P30613   | PKLR            | -0.451 | pyruvate kinase L/R                                      |
| P14618   | PKM             | -0.136 | pyruvate kinase M1/2                                     |
| Q99640   | PKMYT1          | 0.198  | protein kinase, membrane associated tyrosine/threonine 1 |
| Q16512-2 | PKN1            | -0.162 | protein kinase N1                                        |
| Q16513   | PKN2            | -0.118 | protein kinase N2                                        |
| Q99959-2 | PKP2            | -0.094 | plakophilin 2                                            |
| Q9Y263   | PLAA            | -0.156 | phospholipase A2 activating protein                      |
| Q9NQ66-1 | PLCB1           | -0.54  | phospholipase C beta 1                                   |
| Q01970   | PLCB3           | -0.351 | phospholipase C beta 3                                   |
| Q13393-1 | PLD1            | -0.201 | phospholipase D1                                         |
| Q9Y2H5   | PLEKHA6         | -0.248 | pleckstrin homology domain containing A6                 |
| Q6IQ23-2 | PLEKHA7         | -0.437 | pleckstrin homology domain containing A7                 |
| Q9H8W4   | PLEKHF2         | 0.445  | pleckstrin homology and FYVE domain containing 2         |
| Q8TD55   | PLEKHO2         | 0.317  | pleckstrin homology domain containing O2                 |
| Q99541   | PLIN2           | 0.59   | perilipin 2                                              |
| O60664   | PLIN3           | -0.126 | perilipin 3                                              |
| Q02809-2 | PLOD1           | -0.154 | procollagen-lysine,2-oxoglutarate 5-dioxygenase 1        |
| O60568   | PLOD3           | 0.133  | procollagen-lysine,2-oxoglutarate 5-dioxygenase 3        |
| O94903   | PLPBP           | -0.164 | pyridoxal phosphate binding protein                      |
| O43660   | PLRG1           | 0.196  | pleiotropic regulator 1                                  |
| Q14651   | PLS1            | -0.302 | plastin 1                                                |
| P13797   | PLS3            | -0.285 | plastin 3                                                |
| O43157   | PLXNB1          | -0.227 | plexin B1                                                |
| Q9Y4D7-1 | PLXND1          | -0.397 | plexin D1                                                |
| Q8IYS1   | PM20D2          | -0.166 | peptidase M20 domain containing 2                        |
| Q6P1K2-2 | PMF1/PMF1-BGLAP | -0.4   | polyamine modulated factor 1                             |
| O15305   | PMM2            | -0.443 | phosphomannomutase 2                                     |
| Q10713   | PMPCA           | 0.247  | peptidase, mitochondrial processing alpha subunit        |
| O75439   | PMPCB           | 0.26   | peptidase, mitochondrial processing beta subunit         |
| Q8TF01   | PNISR           | -0.246 | PNN interacting serine and arginine rich protein         |
| Q8N490   | PNKD            | -0.835 | PNKD metallo-beta-lactamase domain containing            |
| Q96T60   | PNKP            | 0.142  | polynucleotide kinase 3'-phosphatase                     |
| Q9H307   | PNN             | 0.16   | pinin, desmosome associated protein                      |

|          |                |        |                                                                        |
|----------|----------------|--------|------------------------------------------------------------------------|
| P41247   | PNPLA4         | 0.433  | patatin like phospholipase domain containing 4                         |
| Q9NVS9   | PNPO           | -0.318 | pyridoxamine 5'-phosphate oxidase                                      |
| Q8TCS8   | PNPT1          | 0.14   | polyribonucleotide nucleotidyltransferase 1                            |
| Q8NBL1   | POGLUT1        | 0.148  | protein O-glucosyltransferase 1                                        |
| Q7Z3K3-1 | POGZ           | 0.156  | pogo transposable element derived with ZNF domain                      |
| P09884   | POLA1          | -0.426 | DNA polymerase alpha 1, catalytic subunit                              |
| Q14181   | POLA2          | -0.173 | DNA polymerase alpha 2, accessory subunit                              |
| P06746   | POLB           | 0.236  | DNA polymerase beta                                                    |
| P28340   | POLD1          | -0.364 | DNA polymerase delta 1, catalytic subunit                              |
| P49005   | POLD2          | -0.341 | DNA polymerase delta 2, accessory subunit                              |
| Q9Y2S7   | POLDIP2        | 0.141  | DNA polymerase delta interacting protein 2                             |
| Q07864   | POLE           | -0.277 | DNA polymerase epsilon, catalytic subunit                              |
| Q9NRF9   | POLE3          | -0.155 | DNA polymerase epsilon 3, accessory subunit                            |
| P54098   | POLG           | 0.348  | DNA polymerase gamma, catalytic subunit                                |
| O15160   | POLR1C         | 0.117  | RNA polymerase I and III subunit C                                     |
| Q9GZS1-2 | POLR1E         | 0.322  | RNA polymerase I subunit E                                             |
| P24928   | POLR2A         | -0.174 | RNA polymerase II subunit A                                            |
| P19388   | POLR2E         | -0.158 | RNA polymerase II subunit E                                            |
| P52434   | POLR2H         | -0.403 | RNA polymerase II subunit H                                            |
| P52435   | POLR2J         | 0.332  | RNA polymerase II subunit J                                            |
| Q9BUI4   | POLR3C         | 0.209  | RNA polymerase III subunit C                                           |
| Q9NVU0   | POLR3E         | -0.182 | RNA polymerase III subunit E                                           |
| A8CG34   | POM121/POM121C | 0.606  | POM121 transmembrane nucleoporin                                       |
| Q8WZA1-2 | POMGNT1        | 0.401  | protein O-linked mannose N-acetylglucosaminyltransferase 1 (beta 1,2-) |
| Q8NAT1   | POMGNT2        | 0.301  | protein O-linked mannose N-acetylglucosaminyltransferase 2 (beta 1,4-) |
| Q9H5K3   | POMK           | 0.335  | protein O-mannose kinase                                               |
| Q9Y244   | POMP           | -0.331 | proteasome maturation protein                                          |
| O95707   | POP4           | -0.144 | POP4 homolog, ribonuclease P/MRP subunit                               |
| P16435   | POR            | 0.238  | cytochrome p450 oxidoreductase                                         |
| P14859-6 | POU2F1         | -0.225 | POU class 2 homeobox 1                                                 |
| Q06203   | PPAT           | -0.284 | phosphoribosyl pyrophosphate amidotransferase                          |
| Q9HAB8   | PPCS           | -0.143 | phosphopantothenoylcysteine synthetase                                 |
| P62937   | PPIA           | -0.119 | peptidylprolyl isomerase A                                             |
| P23284   | PPIB           | 0.136  | peptidylprolyl isomerase B                                             |
| P45877   | PPIC           | -0.143 | peptidylprolyl isomerase C                                             |
| Q08752   | PPID           | -0.188 | peptidylprolyl isomerase D                                             |
| P30405   | PPIF           | 0.432  | peptidylprolyl isomerase F                                             |
| Q9H2H8-1 | PPIL3          | -0.185 | peptidylprolyl isomerase like 3                                        |
| O15297   | PPM1D          | 0.543  | protein phosphatase, Mg <sup>2+</sup> /Mn <sup>2+</sup> dependent 1D   |
| P49593   | PPM1F          | -0.23  | protein phosphatase, Mg <sup>2+</sup> /Mn <sup>2+</sup> dependent 1F   |
| O15355   | PPM1G          | -0.125 | protein phosphatase, Mg <sup>2+</sup> /Mn <sup>2+</sup> dependent 1G   |
| Q9ULR3   | PPM1H          | -0.359 | protein phosphatase, Mg <sup>2+</sup> /Mn <sup>2+</sup> dependent 1H   |
| Q96QC0   | PPP1R10        | 0.357  | protein phosphatase 1 regulatory subunit 10                            |
| Q96C90   | PPP1R14B       | -0.594 | protein phosphatase 1 regulatory inhibitor subunit 14B                 |
| Q6NYC8   | PPP1R18        | 0.566  | protein phosphatase 1 regulatory subunit 18                            |
| Q6ZMI0-1 | PPP1R21        | -0.3   | protein phosphatase 1 regulatory subunit 21                            |
| Q15435   | PPP1R7         | -0.284 | protein phosphatase 1 regulatory subunit 7                             |

|                 |         |        |                                                                |
|-----------------|---------|--------|----------------------------------------------------------------|
| <b>Q9ULJ8-3</b> | PPP1R9A | -0.223 | protein phosphatase 1 regulatory subunit 9A                    |
| <b>P30153</b>   | PPP2R1A | -0.163 | protein phosphatase 2 scaffold subunit Aalpha                  |
| <b>P30154</b>   | PPP2R1B | -0.221 | protein phosphatase 2 scaffold subunit Abeta                   |
| <b>Q15172-1</b> | PPP2R5A | -0.334 | protein phosphatase 2 regulatory subunit B'alpha               |
| <b>Q13362</b>   | PPP2R5C | -0.193 | protein phosphatase 2 regulatory subunit B'gamma               |
| <b>Q16537</b>   | PPP2R5E | -0.184 | protein phosphatase 2 regulatory subunit B'epsilon             |
| <b>Q08209</b>   | PPP3CA  | -0.321 | protein phosphatase 3 catalytic subunit alpha                  |
| <b>P63098</b>   | PPP3R1  | -0.269 | protein phosphatase 3 regulatory subunit B, alpha              |
| <b>P60510</b>   | PPP4C   | -0.148 | protein phosphatase 4 catalytic subunit                        |
| <b>Q8TF05</b>   | PPP4R1  | -0.301 | protein phosphatase 4 regulatory subunit 1                     |
| <b>Q9NY27</b>   | PPP4R2  | -0.214 | protein phosphatase 4 regulatory subunit 2                     |
| <b>P53041</b>   | PPP5C   | -0.206 | protein phosphatase 5 catalytic subunit                        |
| <b>O00743-3</b> | PPP6C   | -0.197 | protein phosphatase 6 catalytic subunit                        |
| <b>O75170</b>   | PPP6R2  | -0.189 | protein phosphatase 6 regulatory subunit 2                     |
| <b>Q5H9R7-5</b> | PPP6R3  | -0.331 | protein phosphatase 6 regulatory subunit 3                     |
| <b>O43663</b>   | PRC1    | 0.438  | protein regulator of cytokinesis 1                             |
| <b>Q92733</b>   | PRCC    | -0.123 | proline rich mitotic checkpoint control factor                 |
| <b>P30048</b>   | PRDX3   | 0.279  | peroxiredoxin 3                                                |
| <b>P30041</b>   | PRDX6   | -0.337 | peroxiredoxin 6                                                |
| <b>Q9HCU5</b>   | PREB    | 0.207  | prolactin regulatory element binding                           |
| <b>P48147</b>   | PREP    | -0.318 | prolyl endopeptidase                                           |
| <b>Q4J6C6</b>   | PREPL   | 0.222  | prolyl endopeptidase like                                      |
| <b>P49642</b>   | PRIM1   | -0.196 | DNA primase subunit 1                                          |
| <b>P49643</b>   | PRIM2   | -0.403 | DNA primase subunit 2                                          |
| <b>P17612</b>   | PRKACA  | -0.197 | protein kinase cAMP-activated catalytic subunit alpha          |
| <b>P10644</b>   | PRKAR1A | -0.285 | protein kinase cAMP-dependent type I regulatory subunit alpha  |
| <b>P31321</b>   | PRKAR1B | -0.661 | protein kinase cAMP-dependent type I regulatory subunit beta   |
| <b>P17252</b>   | PRKCA   | -0.131 | protein kinase C alpha                                         |
| <b>Q05655</b>   | PRKCD   | 0.1    | protein kinase C delta                                         |
| <b>O75569</b>   | PRKRA   | 0.145  | protein activator of interferon induced protein kinase EIF2AK2 |
| <b>Q9H875</b>   | PRKRIP1 | -0.153 | PRKR interacting protein 1                                     |
| <b>Q99873</b>   | PRMT1   | -0.164 | protein arginine methyltransferase 1                           |
| <b>O14744</b>   | PRMT5   | -0.159 | protein arginine methyltransferase 5                           |
| <b>Q6P2P2</b>   | PRMT9   | -0.168 | protein arginine methyltransferase 9                           |
| <b>P04070-2</b> | PROC    | -0.428 | protein C, inactivator of coagulation factors Va and VIIIa     |
| <b>Q9UNN8</b>   | PROCR   | 0.64   | protein C receptor                                             |
| <b>Q92786</b>   | PROX1   | 0.153  | prospero homeobox 1                                            |
| <b>Q9UMS4</b>   | PRPF19  | 0.094  | pre-mRNA processing factor 19                                  |
| <b>O43395</b>   | PRPF3   | 0.122  | pre-mRNA processing factor 3                                   |
| <b>Q8NAV1-1</b> | PRPF38A | 0.266  | pre-mRNA processing factor 38A                                 |
| <b>Q5VTL8</b>   | PRPF38B | 0.114  | pre-mRNA processing factor 38B                                 |
| <b>O43172</b>   | PRPF4   | 0.08   | pre-mRNA processing factor 4                                   |
| <b>Q13523</b>   | PRPF4B  | 0.245  | pre-mRNA processing factor 4B                                  |
| <b>P11908-2</b> | PRPS2   | -0.157 | phosphoribosyl pyrophosphate synthetase 2                      |
| <b>Q14558-2</b> | PRPSAP1 | -0.191 | phosphoribosyl pyrophosphate synthetase associated protein 1   |
| <b>O60256-1</b> | PRPSAP2 | -0.218 | phosphoribosyl pyrophosphate synthetase associated protein 2   |
| <b>Q5JSZ5-1</b> | PRRC2B  | -0.165 | proline rich coiled-coil 2B                                    |

|          |        |        |                                                   |
|----------|--------|--------|---------------------------------------------------|
| P07602-3 | PSAP   | -0.404 | prosaposin                                        |
| Q9Y617   | PSAT1  | -0.255 | phosphoserine aminotransferase 1                  |
| P25786-2 | PSMA1  | -0.152 | proteasome subunit alpha 1                        |
| P28066   | PSMA5  | -0.151 | proteasome subunit alpha 5                        |
| P60900   | PSMA6  | 0.114  | proteasome subunit alpha 6                        |
| P28070   | PSMB4  | 0.126  | proteasome subunit beta 4                         |
| P28072   | PSMB6  | -0.142 | proteasome subunit beta 6                         |
| Q99436   | PSMB7  | -0.11  | proteasome subunit beta 7                         |
| Q99460   | PSMD1  | -0.133 | proteasome 26S subunit, non-ATPase 1              |
| Q9UNM6   | PSMD13 | -0.141 | proteasome 26S subunit, non-ATPase 13             |
| O00487   | PSMD14 | 0.115  | proteasome 26S subunit, non-ATPase 14             |
| Q16401   | PSMD5  | -0.297 | proteasome 26S subunit, non-ATPase 5              |
| P48556   | PSMD8  | -0.153 | proteasome 26S subunit, non-ATPase 8              |
| O00233   | PSMD9  | -0.121 | proteasome 26S subunit, non-ATPase 9              |
| Q06323   | PSME1  | -0.597 | proteasome activator subunit 1                    |
| Q9UL46   | PSME2  | -0.322 | proteasome activator subunit 2                    |
| P61289-2 | PSME3  | -0.161 | proteasome activator subunit 3                    |
| Q92530   | PSMF1  | -0.314 | proteasome inhibitor subunit 1                    |
| O95456   | PSMG1  | -0.358 | proteasome assembly chaperone 1                   |
| P78330   | PSPH   | -0.421 | phosphoserine phosphatase                         |
| P26599-3 | PTBP1  | -0.086 | polypyrimidine tract binding protein 1            |
| O95758-4 | PTBP3  | 0.223  | polypyrimidine tract binding protein 3            |
| O75127   | PTCD1  | 0.304  | pentatricopeptide repeat domain 1                 |
| Q96EY7-1 | PTCD3  | 0.3    | pentatricopeptide repeat domain 3                 |
| P48651   | PTDSS1 | 0.113  | phosphatidylserine synthase 1                     |
| Q9BVG9   | PTDSS2 | -0.348 | phosphatidylserine synthase 2                     |
| Q14914   | PTGR1  | 0.326  | prostaglandin reductase 1                         |
| Q13308-6 | PTK7   | -0.227 | protein tyrosine kinase 7 (inactive)              |
| P06454   | PTMA   | -0.314 | prothymosin alpha                                 |
| P20962   | PTMS   | -0.212 | parathymosin                                      |
| Q15257   | PTPA   | -0.364 | protein phosphatase 2 phosphatase activator       |
| Q15257-2 | PTPA   | -0.416 | protein phosphatase 2 phosphatase activator       |
| Q06124   | PTPN11 | -0.098 | protein tyrosine phosphatase non-receptor type 11 |
| Q05209   | PTPN12 | -0.217 | protein tyrosine phosphatase non-receptor type 12 |
| P17706-1 | PTPN2  | -0.253 | protein tyrosine phosphatase non-receptor type 2  |
| Q9H3S7   | PTPN23 | -0.181 | protein tyrosine phosphatase non-receptor type 23 |
| P18433   | PTPRA  | -0.251 | protein tyrosine phosphatase receptor type A      |
| P10586-1 | PTPRF  | -0.522 | protein tyrosine phosphatase receptor type F      |
| Q15262-3 | PTPRK  | -0.547 | protein tyrosine phosphatase receptor type K      |
| Q15262-4 | PTPRK  | -0.45  | protein tyrosine phosphatase receptor type K      |
| Q86Y79   | PTRH1  | 0.27   | peptidyl-tRNA hydrolase 1 homolog                 |
| Q9Y3E5   | PTRH2  | 0.462  | peptidyl-tRNA hydrolase 2                         |
| Q00577   | PURA   | -0.188 | purine rich element binding protein A             |
| Q9Y606   | PUS1   | 0.147  | pseudouridine synthase 1                          |
| Q3MIT2   | PUS10  | -0.402 | pseudouridine synthase 10                         |
| Q96PZ0   | PUS7   | -0.251 | pseudouridine synthase 7                          |
| P15151-1 | PVR    | 0.339  | PVR cell adhesion molecule                        |

|          |          |        |                                                        |
|----------|----------|--------|--------------------------------------------------------|
| P32322-3 | PYCR1    | 0.177  | pyrroline-5-carboxylate reductase 1                    |
| Q96C36   | PYCR2    | 0.41   | pyrroline-5-carboxylate reductase 2                    |
| P11216   | PYGB     | -0.175 | glycogen phosphorylase B                               |
| P06737   | PYGL     | -0.25  | glycogen phosphorylase L                               |
| Q9BRP8   | PYM1     | -0.26  | PYM homolog 1, exon junction complex associated factor |
| Q96PU8   | QKI      | -0.319 | QKI, KH domain containing RNA binding                  |
| Q15274   | QPRT     | -0.223 | quinolinate phosphoribosyltransferase                  |
| Q6ZRP7   | QSOX2    | -0.219 | quiescin sulfhydryl oxidase 2                          |
| Q9BXR0   | QTRT1    | -0.129 | queuine tRNA-ribosyltransferase catalytic subunit 1    |
| P61026   | RAB10    | 0.245  | RAB10, member RAS oncogene family                      |
| Q6IQ22   | RAB12    | 0.105  | RAB12, member RAS oncogene family                      |
| P61106   | RAB14    | 0.128  | RAB14, member RAS oncogene family                      |
| Q9NP72   | RAB18    | 0.194  | RAB18, member RAS oncogene family                      |
| P62820   | RAB1A    | 0.1    | RAB1A, member RAS oncogene family                      |
| Q9UL25   | RAB21    | 0.199  | RAB21, member RAS oncogene family                      |
| Q9UL26   | RAB22A   | 0.276  | RAB22A, member RAS oncogene family                     |
| P51159-1 | RAB27A   | 0.184  | RAB27A, member RAS oncogene family                     |
| P61019   | RAB2A    | 0.098  | RAB2A, member RAS oncogene family                      |
| Q8WUD1   | RAB2B    | 0.348  | RAB2B, member RAS oncogene family                      |
| Q13637   | RAB32    | 0.134  | RAB32, member RAS oncogene family                      |
| Q15286   | RAB35    | 0.15   | RAB35, member RAS oncogene family                      |
| O95716   | RAB3D    | -0.209 | RAB3D, member RAS oncogene family                      |
| Q15042-1 | RAB3GAP1 | -0.165 | RAB3 GTPase activating protein catalytic subunit 1     |
| Q9H2M9   | RAB3GAP2 | -0.186 | RAB3 GTPase activating non-catalytic protein subunit 2 |
| Q86YS6   | RAB43    | -0.104 | RAB43, member RAS oncogene family                      |
| P20338   | RAB4A    | -0.182 | RAB4A, member RAS oncogene family                      |
| P51148-2 | RAB5C    | 0.092  | RAB5C, member RAS oncogene family                      |
| Q9BUV8-5 | RAB5IF   | 0.309  | RAB5 interacting factor                                |
| P61006   | RAB8A    | 0.177  | RAB8A, member RAS oncogene family                      |
| P51151   | RAB9A    | 0.141  | RAB9A, member RAS oncogene family                      |
| Q9UI14   | RABAC1   | -0.223 | Rab acceptor 1                                         |
| Q7Z6M1-1 | RABEPK   | -0.341 | Rab9 effector protein with kelch motifs                |
| Q9Y3P9   | RABGAP1  | -0.47  | RAB GTPase activating protein 1                        |
| P53611   | RABGGTB  | -0.2   | Rab geranylgeranyltransferase subunit beta             |
| Q3YEC7-1 | RABL6    | -0.174 | RAB, member RAS oncogene family like 6                 |
| P63000-2 | RAC1     | 0.267  | Rac family small GTPase 1                              |
| Q9H0H5   | RACGAP1  | 0.28   | Rac GTPase activating protein 1                        |
| P63244   | RACK1    | -0.265 | receptor for activated C kinase 1                      |
| P54725-1 | RAD23A   | -0.29  | RAD23 homolog A, nucleotide excision repair protein    |
| P54725-3 | RAD23A   | -0.437 | RAD23 homolog A, nucleotide excision repair protein    |
| P54727   | RAD23B   | -0.26  | RAD23 homolog B, nucleotide excision repair protein    |
| Q96B01   | RAD51AP1 | 0.348  | RAD51 associated protein 1                             |
| P78406   | RAE1     | 0.331  | ribonucleic acid export 1                              |
| P11233   | RALA     | 0.13   | RAS like proto-oncogene A                              |
| P11234-2 | RALB     | 0.355  | RAS like proto-oncogene B                              |
| Q9UKM9   | RALY     | 0.24   | RALY heterogeneous nuclear ribonucleoprotein           |
| P62826   | RAN      | 0.119  | RAN, member RAS oncogene family                        |

|          |          |        |                                                                       |
|----------|----------|--------|-----------------------------------------------------------------------|
| P43487-2 | RANBP1   | -0.779 | RAN binding protein 1                                                 |
| Q9H6Z4   | RANBP3   | -0.331 | RAN binding protein 3                                                 |
| Q96S59-1 | RANBP9   | 0.128  | RAN binding protein 9                                                 |
| P46060   | RANGAP1  | -0.149 | Ran GTPase activating protein 1                                       |
| P52306-5 | RAP1GDS1 | -0.494 | Rap1 GTPase-GDP dissociation stimulator 1                             |
| P61225   | RAP2B    | 0.213  | RAP2B, member of RAS oncogene family                                  |
| Q8IY67-2 | RAVER1   | -0.225 | ribonucleoprotein, PTB binding 1                                      |
| P06400   | RB1      | -0.183 | RB transcriptional corepressor 1                                      |
| Q09028   | RBBP4    | -0.149 | RB binding protein 4, chromatin remodeling factor                     |
| Q7Z6E9   | RBBP6    | 0.672  | RB binding protein 6, ubiquitin ligase                                |
| O75884   | RBBP9    | -0.273 | RB binding protein 9, serine hydrolase                                |
| Q9BYM8   | RBCK1    | -0.212 | RANBP2-type and C3HC4-type zinc finger containing 1                   |
| O43251-8 | RBFOX2   | -0.623 | RNA binding fox-1 homolog 2                                           |
| Q8N0T1   | RBIS     | -0.955 | ribosomal biogenesis factor                                           |
| Q9H477   | RBKS     | -0.451 | ribokinase                                                            |
| Q8IXT5   | RBM12B   | 0.203  | RNA binding motif protein 12B                                         |
| Q96PK6-1 | RBM14    | 0.147  | RNA binding motif protein 14                                          |
| Q96T37   | RBM15    | 0.313  | RNA binding motif protein 15                                          |
| Q96I25   | RBM17    | 0.166  | RNA binding motif protein 17                                          |
| Q9Y4C8   | RBM19    | -0.154 | RNA binding motif protein 19                                          |
| Q9NW64   | RBM22    | 0.261  | RNA binding motif protein 22                                          |
| P49756-1 | RBM25    | 0.169  | RNA binding motif protein 25                                          |
| P98179   | RBM3     | -0.211 | RNA binding motif protein 3                                           |
| Q96EV2   | RBM33    | 0.176  | RNA binding motif protein 33                                          |
| P42696   | RBM34    | -0.288 | RNA binding motif protein 34                                          |
| Q9BTD8   | RBM42    | -0.145 | RNA binding motif protein 42                                          |
| Q9BQ04   | RBM4B    | 0.376  | RNA binding motif protein 4B                                          |
| P52756   | RBM5     | 0.345  | RNA binding motif protein 5                                           |
| P38159-1 | RBMX     | 0.191  | RNA binding motif protein X-linked                                    |
| Q9Y388   | RBMX2    | 0.207  | RNA binding motif protein X-linked 2                                  |
| P02753   | RBP4     | -0.302 | retinol binding protein 4                                             |
| Q93062-3 | RBPM5    | -0.253 | RNA binding protein, mRNA processing factor                           |
| Q5TC82-1 | RC3H1    | -0.136 | ring finger and CCCH-type domains 1                                   |
| P18754-2 | RCC1     | 0.086  | regulator of chromosome condensation 1                                |
| Q96I51   | RCC1L    | 0.195  | RCC1 like                                                             |
| Q9UKL0   | RCOR1    | -0.175 | REST corepressor 1                                                    |
| Q8IZV5   | RDH10    | 0.163  | retinol dehydrogenase 10                                              |
| Q8TC12   | RDH11    | 0.187  | retinol dehydrogenase 11                                              |
| Q9HBH5   | RDH14    | 0.355  | retinol dehydrogenase 14                                              |
| P35241-5 | RDX      | 0.132  | radixin                                                               |
| Q9H6H4   | REEP4    | 0.336  | receptor accessory protein 4                                          |
| Q00765   | REEP5    | 0.339  | receptor accessory protein 5                                          |
| Q04206   | RELA     | -0.34  | RELA proto-oncogene, NF-kB subunit                                    |
| Q9P260-2 | RELCH    | -0.128 | RAB11 binding and LisH domain, coiled-coil and HEAT repeat containing |
| P78509   | RELN     | -0.468 | reelin                                                                |
| Q9BWE0-4 | REPIN1   | 0.251  | replication initiator 1                                               |
| Q8NC44   | RETREG2  | -0.127 | reticulophagy regulator family member 2                               |

|          |          |        |                                                        |
|----------|----------|--------|--------------------------------------------------------|
| Q86VR2   | RETREG3  | -0.156 | reticulophagy regulator family member 3                |
| Q6NUM9-1 | RETSAT   | 0.39   | retinol saturase                                       |
| P35250-1 | RFC2     | -0.233 | replication factor C subunit 2                         |
| P40937-1 | RFC5     | -0.075 | replication factor C subunit 5                         |
| Q969G6   | RFK      | 0.422  | riboflavin kinase                                      |
| Q6NTF9-2 | RHBDD2   | 0.347  | rhomboid domain containing 2                           |
| Q15382   | RHEB     | 0.149  | Ras homolog, mTORC1 binding                            |
| P84095   | RHOG     | 0.18   | ras homolog family member G                            |
| Q8IXI1   | RHOT2    | 0.176  | ras homolog family member T2                           |
| Q6R327-3 | RICTOR   | -0.148 | RPTOR independent companion of MTOR complex 2          |
| Q5UIP0   | RIF1     | 0.238  | replication timing regulatory factor 1                 |
| Q13671   | RIN1     | 0.667  | Ras and Rab interactor 1                               |
| Q6NUQ1   | RINT1    | -0.09  | RAD50 interactor 1                                     |
| Q9BRS2   | RIOK1    | -0.238 | RIO kinase 1                                           |
| Q9BVS4   | RIOK2    | -0.204 | RIO kinase 2                                           |
| O14730   | RIOK3    | 0.2    | RIO kinase 3                                           |
| Q8IUF8   | RIOX2    | -0.161 | ribosomal oxygenase 2                                  |
| Q13546   | RIPK1    | 0.098  | receptor interacting serine/threonine kinase 1         |
| Q96TC7   | RMDN3    | 0.296  | regulator of microtubule dynamics 3                    |
| Q9NWS8   | RMND1    | 0.398  | required for meiotic nuclear division 1 homolog        |
| Q8TDP1   | RNASEH2C | -0.379 | ribonuclease H2 subunit C                              |
| Q9Y508   | RNF114   | 0.538  | ring finger protein 114                                |
| Q8NC42   | RNF149   | -0.234 | ring finger protein 149                                |
| Q99496   | RNF2     | 0.091  | ring finger protein 2                                  |
| Q63HN8-4 | RNF213   | -0.194 | ring finger protein 213                                |
| Q8ND24   | RNF214   | -0.088 | ring finger protein 214                                |
| O75150   | RNF40    | 0.118  | ring finger protein 40                                 |
| O60942-1 | RNGTT    | -0.239 | RNA guanylyltransferase and 5'-phosphatase             |
| P13489   | RNH1     | -0.247 | ribonuclease/angiogenin inhibitor 1                    |
| Q9H4A4   | RNPEP    | -0.174 | arginyl aminopeptidase                                 |
| Q15287-1 | RNPS1    | 0.224  | RNA binding protein with serine rich domain 1          |
| Q9Y6N7-2 | ROBO1    | -0.534 | roundabout guidance receptor 1                         |
| O75116   | ROCK2    | -0.211 | Rho associated coiled-coil containing protein kinase 2 |
| Q8TA86   | RP9      | -0.353 | RP9 pre-mRNA splicing factor                           |
| Q9BWH6   | RPAP1    | -0.164 | RNA polymerase II associated protein 1                 |
| Q9H6T3   | RPAP3    | -0.234 | RNA polymerase II associated protein 3                 |
| Q96AT9   | RPE      | -0.187 | ribulose-5-phosphate-3-epimerase                       |
| P49247   | RPIA     | -0.126 | ribose 5-phosphate isomerase A                         |
| P30050   | RPL12    | -0.24  | ribosomal protein L12                                  |
| P50914   | RPL14    | 0.831  | ribosomal protein L14                                  |
| Q07020   | RPL18    | 0.601  | ribosomal protein L18                                  |
| P62829   | RPL23    | -0.301 | ribosomal protein L23                                  |
| P61254   | RPL26    | 0.273  | ribosomal protein L26                                  |
| Q9UNX3   | RPL26L1  | -0.532 | ribosomal protein L26 like 1                           |
| P46776   | RPL27A   | 0.197  | ribosomal protein L27a                                 |
| P46779   | RPL28    | 0.442  | ribosomal protein L28                                  |
| P62899   | RPL31    | -0.343 | ribosomal protein L31                                  |

|                 |          |        |                                                                      |
|-----------------|----------|--------|----------------------------------------------------------------------|
| <b>P18077</b>   | RPL35A   | 0.318  | ribosomal protein L35a                                               |
| <b>Q9Y3U8</b>   | RPL36    | -0.163 | ribosomal protein L36                                                |
| <b>Q969Q0</b>   | RPL36AL  | 0.848  | ribosomal protein L36a like                                          |
| <b>P05388</b>   | RPLP0    | -0.215 | ribosomal protein lateral stalk subunit P0                           |
| <b>P04843</b>   | RPN1     | 0.169  | ribophorin I                                                         |
| <b>P04844-1</b> | RPN2     | 0.198  | ribophorin II                                                        |
| <b>O75818</b>   | RPP40    | -0.076 | ribonuclease P/MRP subunit p40                                       |
| <b>Q96P16-1</b> | RPRD1A   | -0.113 | regulation of nuclear pre-mRNA domain containing 1A                  |
| <b>P62280</b>   | RPS11    | 0.648  | ribosomal protein S11                                                |
| <b>P62841</b>   | RPS15    | -0.199 | ribosomal protein S15                                                |
| <b>P08708</b>   | RPS17    | -0.233 | ribosomal protein S17                                                |
| <b>P39019</b>   | RPS19    | -0.19  | ribosomal protein S19                                                |
| <b>Q86WX3</b>   | RPS19BP1 | -0.435 | ribosomal protein S19 binding protein 1                              |
| <b>P15880</b>   | RPS2     | -0.167 | ribosomal protein S2                                                 |
| <b>P60866</b>   | RPS20    | -0.137 | ribosomal protein S20                                                |
| <b>P63220</b>   | RPS21    | -0.385 | ribosomal protein S21                                                |
| <b>P42677</b>   | RPS27    | -0.214 | ribosomal protein S27                                                |
| <b>P62979</b>   | RPS27A   | 0.682  | ribosomal protein S27a                                               |
| <b>Q71UM5</b>   | RPS27L   | 0.225  | ribosomal protein S27 like                                           |
| <b>P62857</b>   | RPS28    | -0.172 | ribosomal protein S28                                                |
| <b>P62701</b>   | RPS4X    | 0.16   | ribosomal protein S4 X-linked                                        |
| <b>P51812</b>   | RPS6KA3  | -0.323 | ribosomal protein S6 kinase A3                                       |
| <b>P46781</b>   | RPS9     | 0.309  | ribosomal protein S9                                                 |
| <b>P08865</b>   | RPSA     | -0.211 | ribosomal protein SA                                                 |
| <b>Q8N122</b>   | RPTOR    | -0.332 | regulatory associated protein of MTOR complex 1                      |
| <b>Q8IZ73</b>   | RPUSD2   | -0.169 | RNA pseudouridine synthase domain containing 2                       |
| <b>P55042</b>   | RRAD     | 2.84   | RRAD, Ras related glycolysis inhibitor and calcium channel regulator |
| <b>Q7L523</b>   | RRAGA    | 0.46   | Ras related GTP binding A                                            |
| <b>Q9HB90</b>   | RRAGC    | 0.157  | Ras related GTP binding C                                            |
| <b>P62070-4</b> | RRAS2    | 0.363  | RAS related 2                                                        |
| <b>Q9P2E9-1</b> | RRBP1    | 0.09   | ribosome binding protein 1                                           |
| <b>Q92766-2</b> | RREB1    | -0.263 | ras responsive element binding protein 1                             |
| <b>Q7LG56</b>   | RRM2B    | 0.216  | ribonucleotide reductase regulatory TP53 inducible subunit M2B       |
| <b>Q7LG56-6</b> | RRM2B    | 0.497  | ribonucleotide reductase regulatory TP53 inducible subunit M2B       |
| <b>Q9NYV6</b>   | RRN3     | 0.325  | RRN3 homolog, RNA polymerase I transcription factor                  |
| <b>P56182</b>   | RRP1     | 0.184  | ribosomal RNA processing 1                                           |
| <b>Q14684</b>   | RRP1B    | 0.148  | ribosomal RNA processing 1B                                          |
| <b>Q96EU6</b>   | RRP36    | -0.412 | ribosomal RNA processing 36                                          |
| <b>O43159</b>   | RRP8     | 0.154  | ribosomal RNA processing 8                                           |
| <b>Q15050</b>   | RRS1     | -0.405 | ribosome biogenesis regulator 1 homolog                              |
| <b>Q9UHA3</b>   | RSL24D1  | -0.215 | ribosomal L24 domain containing 1                                    |
| <b>Q15404</b>   | RSU1     | -0.121 | Ras suppressor protein 1                                             |
| <b>Q9BY42</b>   | RTF2     | -0.122 | replication termination factor 2                                     |
| <b>Q9Y230</b>   | RUVBL2   | -0.143 | RuvB like AAA ATPase 2                                               |
| <b>Q6NW29</b>   | RWDD4    | -0.543 | RWD domain containing 4                                              |
| <b>P19793</b>   | RXRA     | -0.637 | retinoid X receptor alpha                                            |
| <b>P28702-3</b> | RXRB     | -0.274 | retinoid X receptor beta                                             |

|          |          |        |                                                                                 |
|----------|----------|--------|---------------------------------------------------------------------------------|
| P23297   | S100A1   | -0.67  | S100 calcium binding protein A1                                                 |
| P31949   | S100A11  | 0.833  | S100 calcium binding protein A11                                                |
| Q99584   | S100A13  | -0.097 | S100 calcium binding protein A13                                                |
| Q96FQ6   | S100A16  | 0.221  | S100 calcium binding protein A16                                                |
| P06703   | S100A6   | 0.154  | S100 calcium binding protein A6                                                 |
| P25815   | S100P    | 0.219  | S100 calcium binding protein P                                                  |
| Q96ER3   | SAAL1    | -0.18  | serum amyloid A like 1                                                          |
| Q9UBE0   | SAE1     | -0.24  | SUMO1 activating enzyme subunit 1                                               |
| Q9Y3Z3   | SAMHD1   | -0.154 | SAM and HD domain containing deoxynucleoside triphosphate triphosphohydrolase 1 |
| O00422   | SAP18    | 0.305  | Sin3A associated protein 18                                                     |
| Q9Y6B6   | SAR1B    | -0.226 | secretion associated Ras related GTPase 1B                                      |
| P82979   | SARNP    | 0.253  | SAP domain containing ribonucleoprotein                                         |
| Q9NP81   | SARS2    | 0.241  | seryl-tRNA synthetase 2, mitochondrial                                          |
| O43290   | SART1    | -0.1   | spliceosome associated factor 1, recruiter of U4/U6.U5 tri-snRNP                |
| A3KN83   | SBNO1    | 0.221  | strawberry notch homolog 1                                                      |
| O15127   | SCAMP2   | 0.091  | secretory carrier membrane protein 2                                            |
| Q8WTV0-2 | SCARB1   | -0.126 | scavenger receptor class B member 1                                             |
| Q8NBX0   | SCCPDH   | 0.204  | saccharopine dehydrogenase (putative)                                           |
| Q8WU76-1 | SCFD2    | -0.361 | sec1 family domain containing 2                                                 |
| O75880   | SCO1     | 0.333  | SCO cytochrome c oxidase assembly protein 1                                     |
| O43819   | SCO2     | 0.14   | SCO cytochrome c oxidase assembly protein 2                                     |
| P22307   | SCP2     | 0.235  | sterol carrier protein 2                                                        |
| Q9HB40   | SCPEP1   | -0.226 | serine carboxypeptidase 1                                                       |
| Q12765-2 | SCRN1    | -0.172 | secernin 1                                                                      |
| P18827   | SDC1     | -0.476 | syndecan 1                                                                      |
| P34741   | SDC2     | -1.046 | syndecan 2                                                                      |
| O00560   | SDCBP    | 0.522  | syndecan binding protein                                                        |
| Q6IQ49-1 | SDE2     | 0.175  | SDE2 telomere maintenance homolog                                               |
| Q99470   | SDF2     | 0.412  | stromal cell derived factor 2                                                   |
| P31040   | SDHA     | 0.33   | succinate dehydrogenase complex flavoprotein subunit A                          |
| P21912   | SDHB     | 0.164  | succinate dehydrogenase complex iron sulfur subunit B                           |
| Q9NRG7-2 | SDR39U1  | 0.246  | short chain dehydrogenase/reductase family 39U member 1                         |
| P67812-3 | SEC11A   | 0.29   | SEC11 homolog A, signal peptidase complex subunit                               |
| O75396   | SEC22B   | 0.204  | SEC22 homolog B, vesicle trafficking protein (gene/pseudogene)                  |
| Q15436   | SEC23A   | -0.232 | Sec23 homolog A, coat complex II component                                      |
| Q15437   | SEC23B   | -0.246 | SEC23 homolog B, coat complex II component                                      |
| Q9Y6Y8   | SEC23IP  | -0.228 | SEC23 interacting protein                                                       |
| O95486   | SEC24A   | -0.449 | SEC24 homolog A, COPII coat complex component                                   |
| O95487-3 | SEC24B   | -0.139 | SEC24 homolog B, COPII coat complex component                                   |
| P53992   | SEC24C   | -0.194 | SEC24 homolog C, COPII coat complex component                                   |
| O94855-2 | SEC24D   | -0.36  | SEC24 homolog D, COPII coat complex component                                   |
| O94979-8 | SEC31A   | -0.25  | SEC31 homolog A, COPII coat complex component                                   |
| P61619   | SEC61A1  | -0.132 | SEC61 translocon alpha 1 subunit                                                |
| Q99442   | SEC62    | 0.154  | SEC62 homolog, preprotein translocation factor                                  |
| Q13228-4 | SELENBP1 | -0.334 | selenium binding protein 1                                                      |
| O60613   | SELENOF  | -0.305 | selenoprotein F                                                                 |
| Q9C0D9   | SELENOI  | 0.533  | selenoprotein I                                                                 |

|            |          |        |                                                               |
|------------|----------|--------|---------------------------------------------------------------|
| P49903     | SEPHS1   | -0.201 | selenophosphate synthetase 1                                  |
| Q99611     | SEPHS2   | -0.133 | selenophosphate synthetase 2                                  |
| Q9NVA2-2   | SEPTIN11 | -0.293 | septin 11                                                     |
| Q92599-1   | SEPTIN8  | -0.23  | septin 8                                                      |
| Q9UHD8-1   | SEPTIN9  | -0.346 | septin 9                                                      |
| Q8NC51-1   | SERBP1   | -0.306 | SERPINE1 mRNA binding protein 1                               |
| P84101-1   | SERF2    | -0.308 | small EDRK-rich factor 2                                      |
| P05154     | SERPINA5 | -0.349 | serpin family A member 5                                      |
| P08185     | SERPINA6 | -0.389 | serpin family A member 6                                      |
| P05543     | SERPINA7 | -0.253 | serpin family A member 7                                      |
| P35237     | SERPINB6 | -0.186 | serpin family B member 6                                      |
| P50453     | SERPINB9 | 0.211  | serpin family B member 9                                      |
| P01008     | SERPINC1 | -0.637 | serpin family C member 1                                      |
| P05546     | SERPIND1 | -0.437 | serpin family D member 1                                      |
| P05121     | SERPINE1 | 0.899  | serpin family E member 1                                      |
| P08697-1   | SERPINF2 | -0.493 | serpin family F member 2                                      |
| P50454     | SERPINH1 | 0.611  | serpin family H member 1                                      |
| P58004     | SESN2    | 1.277  | sestrin 2                                                     |
| Q01105     | SET      | -0.172 | SET nuclear proto-oncogene                                    |
| Q9BYW2     | SETD2    | -0.275 | SET domain containing 2, histone lysine methyltransferase     |
| Q86TU7     | SETD3    | -0.305 | SET domain containing 3, actin histidine methyltransferase    |
| Q15637-5   | SF1      | -0.27  | splicing factor 1                                             |
| Q15428     | SF3A2    | 0.239  | splicing factor 3a subunit 2                                  |
| Q9Y3B4     | SF3B6    | 0.187  | splicing factor 3b subunit 6                                  |
| P31947     | SFN      | 0.41   | stratifin                                                     |
| Q58719     | SFT2D3   | 0.262  | SFT2 domain containing 3                                      |
| Q9H9B4     | SFXN1    | 0.268  | sideroflexin 1                                                |
| A0A0A0MS41 | SFXN3    | 0.338  | sideroflexin 3                                                |
| Q8TD22     | SFXN5    | 0.295  | sideroflexin 5                                                |
| Q562F6     | SGO2     | 0.415  | shugoshin 2                                                   |
| O95470     | SGPL1    | 0.148  | sphingosine-1-phosphate lyase 1                               |
| Q96EQ0     | SGTB     | -0.326 | small glutamine rich tetratricopeptide repeat containing beta |
| Q9Y3L3-1   | SH3BP1   | -0.222 | SH3 domain binding protein 1                                  |
| Q9POV3     | SH3BP4   | 0.436  | SH3 domain binding protein 4                                  |
| Q9NR46-2   | SH3GLB2  | -0.364 | SH3 domain containing GRB2 like, endophilin B2                |
| Q8NEM2     | SHCBP1   | 0.617  | SHC binding and spindle associated 1                          |
| P34896     | SHMT1    | -0.442 | serine hydroxymethyltransferase 1                             |
| P34897-1   | SHMT2    | 0.304  | serine hydroxymethyltransferase 2                             |
| Q9UQ13     | SHOC2    | 0.491  | SHOC2 leucine rich repeat scaffold protein                    |
| A0A0B4J2A0 | SHPK     | -0.305 | sedoheptulokinase                                             |
| Q2M3G4-1   | SHROOM1  | -0.383 | shroom family member 1                                        |
| A0MZ66-3   | SHTN1    | -0.125 | shootin 1                                                     |
| Q99720     | SIGMAR1  | 0.371  | sigma non-opioid intracellular receptor 1                     |
| Q96EB6     | SIRT1    | 0.37   | sirtuin 1                                                     |
| Q9NTG7     | SIRT3    | 0.241  | sirtuin 3                                                     |
| Q9NXA8-1   | SIRT5    | -0.115 | sirtuin 5                                                     |
| Q9NRC8     | SIRT7    | 0.272  | sirtuin 7                                                     |

|          |          |        |                                                                                         |
|----------|----------|--------|-----------------------------------------------------------------------------------------|
| Q15477   | SKIV2L   | -0.13  | Ski2 like RNA helicase                                                                  |
| Q9UP95   | SLC12A4  | 0.148  | solute carrier family 12 member 4                                                       |
| Q9UHW9-2 | SLC12A6  | -0.279 | solute carrier family 12 member 6                                                       |
| Q9Y666   | SLC12A7  | -0.232 | solute carrier family 12 member 7                                                       |
| P53985   | SLC16A1  | 0.272  | solute carrier family 16 member 1                                                       |
| O15427   | SLC16A3  | -0.205 | solute carrier family 16 member 3                                                       |
| P43007   | SLC1A4   | -0.291 | solute carrier family 1 member 4                                                        |
| Q15758   | SLC1A5   | 0.101  | solute carrier family 1 member 5                                                        |
| Q8WUM9   | SLC20A1  | -0.424 | solute carrier family 20 member 1                                                       |
| Q08357   | SLC20A2  | 0.719  | solute carrier family 20 member 2                                                       |
| Q9UGH3   | SLC23A2  | -0.318 | solute carrier family 23 member 2                                                       |
| P53007   | SLC25A1  | 0.17   | solute carrier family 25 member 1                                                       |
| Q9UBX3-2 | SLC25A10 | 0.308  | solute carrier family 25 member 10                                                      |
| O75746   | SLC25A12 | 0.192  | solute carrier family 25 member 12                                                      |
| Q9UJS0-2 | SLC25A13 | 0.346  | solute carrier family 25 member 13                                                      |
| Q9Y619   | SLC25A15 | 0.284  | solute carrier family 25 member 15                                                      |
| Q6NUK1   | SLC25A24 | 0.22   | solute carrier family 25 member 24                                                      |
| Q00325-1 | SLC25A3  | 0.608  | solute carrier family 25 member 3                                                       |
| P05141   | SLC25A5  | 0.549  | solute carrier family 25 member 5                                                       |
| P12236   | SLC25A6  | 0.675  | solute carrier family 25 member 6                                                       |
| O14975   | SLC27A2  | -0.184 | solute carrier family 27 member 2                                                       |
| Q6P1M0   | SLC27A4  | -0.162 | solute carrier family 27 member 4                                                       |
| P11166   | SLC2A1   | -0.16  | solute carrier family 2 member 1                                                        |
| Q9Y6M5   | SLC30A1  | 0.977  | solute carrier family 30 member 1                                                       |
| Q9HBR0   | SLC38A10 | -0.224 | solute carrier family 38 member 10                                                      |
| Q99624   | SLC38A3  | -0.234 | solute carrier family 38 member 3                                                       |
| Q15043   | SLC39A14 | -0.379 | solute carrier family 39 member 14                                                      |
| P08195-4 | SLC3A2   | 0.359  | solute carrier family 3 member 2                                                        |
| Q8WWI5   | SLC44A1  | -0.334 | solute carrier family 44 member 1                                                       |
| Q9UPY5   | SLC7A11  | 0.696  | solute carrier family 7 member 11                                                       |
| Q01650   | SLC7A5   | 0.255  | solute carrier family 7 member 5                                                        |
| O14745   | SLC9A3R1 | -0.376 | SLC9A3 regulator 1                                                                      |
| Q15599   | SLC9A3R2 | -0.297 | SLC9A3 regulator 2                                                                      |
| O95391   | SLU7     | 0.398  | SLU7 homolog, splicing factor                                                           |
| Q99717   | SMAD5    | 0.532  | SMAD family member 5                                                                    |
| P51532-1 | SMARCA4  | 0.13   | SWI/SNF related, matrix associated, actin dependent regulator of chromatin, subfamily a |
| O60264   | SMARCA5  | 0.298  | SWI/SNF related, matrix associated, actin dependent regulator of chromatin, subfamily a |
| Q92925   | SMARCD2  | -0.231 | SWI/SNF related, matrix associated, actin dependent regulator of chromatin, subfamily d |
| Q9NTJ3-1 | SMC4     | 0.074  | structural maintenance of chromosomes 4                                                 |
| Q8IY18   | SMC5     | 0.147  | structural maintenance of chromosomes 5                                                 |
| A6NHR9-1 | SMCHD1   | 0.139  | structural maintenance of chromosomes flexible hinge domain containing 1                |
| Q96Q15-1 | SMG1     | -0.272 | SMG1 nonsense mediated mRNA decay associated PI3K related kinase                        |
| Q86US8-1 | SMG6     | -0.547 | SMG6 nonsense mediated mRNA decay factor                                                |
| Q8ND04-2 | SMG8     | 0.231  | SMG8 nonsense mediated mRNA decay factor                                                |
| Q8N5G0-2 | SMIM20   | 0.555  | small integral membrane protein 20                                                      |
| O75940   | SMNDC1   | -0.216 | survival motor neuron domain containing 1                                               |
| Q9NWM0   | SMOX     | 0.462  | spermine oxidase                                                                        |

|           |          |        |                                                        |
|-----------|----------|--------|--------------------------------------------------------|
| P52788    | SMS      | -0.228 | spermine synthase                                      |
| P53814-6  | SMTN     | 0.989  | smoothelin                                             |
| Q2TAY7    | SMU1     | 0.248  | SMU1 DNA replication regulator and spliceosomal factor |
| Q9NRG4    | SMYD2    | -0.364 | SET and MYND domain containing 2                       |
| Q6GMV2    | SMYD5    | -0.355 | SMYD family member 5                                   |
| O00161    | SNAP23   | -0.148 | synaptosome associated protein 23                      |
| Q7KZF4    | SND1     | -0.232 | staphylococcal nuclease and tudor domain containing 1  |
| Q96H20    | SNF8     | -0.213 | SNF8 subunit of ESCRT-II                               |
| Q8TAD8    | SNIP1    | 0.341  | Smad nuclear interacting protein 1                     |
| O75643-1  | SNRNP200 | 0.187  | small nuclear ribonucleoprotein U5 subunit 200         |
| P62314    | SNRPD1   | 0.284  | small nuclear ribonucleoprotein D1 polypeptide         |
| P62316    | SNRPD2   | -0.147 | small nuclear ribonucleoprotein D2 polypeptide         |
| P62304    | SNRPE    | 0.115  | small nuclear ribonucleoprotein polypeptide E          |
| Q13425-1  | SNTB2    | 0.217  | syntrophin beta 2                                      |
| P55769    | SNU13    | -0.152 | small nuclear ribonucleoprotein 13                     |
| Q13596    | SNX1     | -0.173 | sorting nexin 1                                        |
| Q9UMY4    | SNX12    | -0.31  | sorting nexin 12                                       |
| Q9NRS6    | SNX15    | -0.363 | sorting nexin 15                                       |
| Q15036-1  | SNX17    | -0.228 | sorting nexin 17                                       |
| O60749    | SNX2     | -0.173 | sorting nexin 2                                        |
| Q96L92    | SNX27    | -0.168 | sorting nexin 27                                       |
| Q5VWJ9    | SNX30    | -0.265 | sorting nexin family member 30                         |
| O95219    | SNX4     | -0.244 | sorting nexin 4                                        |
| Q9Y5X3    | SNX5     | -0.178 | sorting nexin 5                                        |
| Q9UNH6-3  | SNX7     | -0.363 | sorting nexin 7                                        |
| Q9Y5X2    | SNX8     | -0.389 | sorting nexin 8                                        |
| P04179    | SOD2     | 0.419  | superoxide dismutase 2                                 |
| O94964-2  | SOGA1    | -0.124 | suppressor of glucose, autophagy associated 1          |
| O94875-11 | SORBS2   | -0.371 | sorbin and SH3 domain containing 2                     |
| Q00796    | SORD     | -0.414 | sorbitol dehydrogenase                                 |
| Q92673    | SORL1    | -0.946 | sortilin related receptor 1                            |
| Q99523    | SORT1    | -0.378 | sortilin 1                                             |
| P48436    | SOX9     | -0.291 | SRY-box transcription factor 9                         |
| Q07617    | SPAG1    | 0.343  | sperm associated antigen 1                             |
| Q96R06    | SPAG5    | 0.148  | sperm associated antigen 5                             |
| O75391    | SPAG7    | -0.69  | sperm associated antigen 7                             |
| O60271    | SPAG9    | -0.211 | sperm associated antigen 9                             |
| Q8TB22-2  | SPATA20  | 0.238  | spermatogenesis associated 20                          |
| Q8NB90-1  | SPATA5   | -0.443 | spermatogenesis associated 5                           |
| Q9HBM1    | SPC25    | -0.197 | SPC25 component of NDC80 kinetochore complex           |
| Q15005    | SPCS2    | 0.232  | signal peptidase complex subunit 2                     |
| P61009    | SPCS3    | 0.729  | signal peptidase complex subunit 3                     |
| Q96EA4    | SPDL1    | 0.479  | spindle apparatus coiled-coil protein 1                |
| Q9H2V7    | SPNS1    | 0.11   | sphingolipid transporter 1 (putative)                  |
| P10451    | SPP1     | -0.308 | secreted phosphoprotein 1                              |
| P35270    | SPR      | -0.104 | sepiapterin reductase                                  |
| Q5W111    | SPRYD7   | 0.115  | SPRY domain containing 7                               |

|          |         |        |                                                            |
|----------|---------|--------|------------------------------------------------------------|
| Q01082-3 | SPTBN1  | 0.677  | spectrin beta, non-erythrocytic 1                          |
| Q9NUV7   | SPTLC3  | -0.412 | serine palmitoyltransferase long chain base subunit 3      |
| Q68D10   | SPTY2D1 | 0.805  | SPT2 chromatin protein domain containing 1                 |
| Q14534   | SQLE    | -0.153 | squalene epoxidase                                         |
| Q9Y6N5   | SQOR    | 0.5    | sulfide quinone oxidoreductase                             |
| Q13501-1 | SQSTM1  | 0.323  | sequestosome 1                                             |
| Q9HD15   | SRA1    | -0.222 | steroid receptor RNA activator 1                           |
| P12931-2 | SRC     | 0.16   | SRC proto-oncogene, non-receptor tyrosine kinase           |
| Q6ZRS2   | SRCAP   | 0.298  | Snf2 related CREBBP activator protein                      |
| O75044   | SRGAP2  | -0.265 | SLIT-ROBO Rho GTPase activating protein 2                  |
| P19623   | SRM     | -0.114 | spermidine synthase                                        |
| Q9UHB9   | SRP68   | -0.108 | signal recognition particle 68                             |
| O76094   | SRP72   | -0.12  | signal recognition particle 72                             |
| P49458   | SRP9    | -0.188 | signal recognition particle 9                              |
| Q96SB4   | SRPK1   | -0.249 | SRSF protein kinase 1                                      |
| Q9BXP5   | SRRT    | 0.157  | serrate, RNA effector molecule                             |
| Q01130   | SRSF2   | -0.296 | serine and arginine rich splicing factor 2                 |
| Q13247   | SRSF6   | 0.239  | serine and arginine rich splicing factor 6                 |
| Q16629   | SRSF7   | 0.448  | serine and arginine rich splicing factor 7                 |
| Q9BYN0   | SRXN1   | 1.178  | sulfiredoxin 1                                             |
| Q04837   | SSBP1   | 0.3    | single stranded DNA binding protein 1                      |
| P43307   | SSR1    | 0.14   | signal sequence receptor subunit 1                         |
| Q9UNL2-2 | SSR3    | 0.169  | signal sequence receptor subunit 3                         |
| P51571   | SSR4    | 0.19   | signal sequence receptor subunit 4                         |
| Q9NP77   | SSU72   | -0.197 | SSU72 homolog, RNA polymerase II CTD phosphatase           |
| P50502   | ST13    | -0.196 | ST13 Hsp70 interacting protein                             |
| P15907   | ST6GAL1 | -0.426 | ST6 beta-galactoside alpha-2,6-sialyltransferase 1         |
| O95630   | STAMBP  | -0.232 | STAM binding protein                                       |
| Q9Y365   | STARD10 | -0.184 | StAR related lipid transfer domain containing 10           |
| Q9NUL3   | STAU2   | -0.289 | staufen double-stranded RNA binding protein 2              |
| Q658P3-2 | STEAP3  | -0.877 | STEAP3 metalloredutase                                     |
| Q9Y6E0   | STK24   | -0.303 | serine/threonine kinase 24                                 |
| Q13188-2 | STK3    | -0.721 | serine/threonine kinase 3                                  |
| Q8TDR2   | STK35   | 0.214  | serine/threonine kinase 35                                 |
| Q9UEW8   | STK39   | -0.46  | serine/threonine kinase 39                                 |
| Q13043-1 | STK4    | -0.095 | serine/threonine kinase 4                                  |
| P16949-1 | STMN1   | -0.308 | stathmin 1                                                 |
| P27105   | STOM    | 0.609  | stomatin                                                   |
| Q9UJZ1   | STOML2  | 0.256  | stomatin like 2                                            |
| O43815   | STRN    | -0.161 | striatin                                                   |
| P46977   | STT3A   | 0.144  | STT3 oligosaccharyltransferase complex catalytic subunit A |
| Q8TCJ2   | STT3B   | 0.137  | STT3 oligosaccharyltransferase complex catalytic subunit B |
| Q9UNE7-1 | STUB1   | -0.19  | STIP1 homology and U-box containing protein 1              |
| Q86Y82   | STX12   | 0.137  | syntaxin 12                                                |
| Q9P2W9   | STX18   | -0.165 | syntaxin 18                                                |
| Q13277   | STX3    | 0.455  | syntaxin 3                                                 |
| Q12846   | STX4    | 0.153  | syntaxin 4                                                 |

|                 |                 |        |                                                                   |
|-----------------|-----------------|--------|-------------------------------------------------------------------|
| <b>O43752</b>   | STX6            | 0.307  | syntaxin 6                                                        |
| <b>Q9UNK0</b>   | STX8            | -0.416 | syntaxin 8                                                        |
| <b>O00186</b>   | STXBP3          | 0.189  | syntaxin binding protein 3                                        |
| <b>P53999</b>   | SUB1            | 0.211  | SUB1 regulator of transcription                                   |
| <b>Q9P2R7</b>   | SUCLA2          | 0.314  | succinate-CoA ligase ADP-forming beta subunit                     |
| <b>P53597</b>   | SUCLG1          | 0.396  | succinate-CoA ligase alpha subunit                                |
| <b>Q96199</b>   | SUCLG2          | 0.195  | succinate-CoA ligase GDP-forming beta subunit                     |
| <b>P50225</b>   | SULT1A1         | -0.21  | sulfotransferase family 1A member 1                               |
| <b>P0DMM9</b>   | SULT1A3/SULT1A4 | -0.241 | sulfotransferase family 1A member 3                               |
| <b>Q06520</b>   | SULT2A1         | -0.357 | sulfotransferase family 2A member 1                               |
| <b>O94901-9</b> | SUN1            | 0.323  | Sad1 and UNC84 domain containing 1                                |
| <b>Q9Y5B9</b>   | SUPT16H         | 0.143  | SPT16 homolog, facilitates chromatin remodeling subunit           |
| <b>Q8IYB8</b>   | SUPV3L1         | 0.35   | Suv3 like RNA helicase                                            |
| <b>O15260</b>   | SURF4           | 0.101  | surfeit 4                                                         |
| <b>O75683</b>   | SURF6           | -0.855 | surfeit 6                                                         |
| <b>Q9UH65</b>   | SWAP70          | 0.099  | switching B cell complex subunit SWAP70                           |
| <b>Q96A49</b>   | SYAP1           | -0.283 | synapse associated protein 1                                      |
| <b>O95926</b>   | SYF2            | -0.279 | SYF2 pre-mRNA splicing factor                                     |
| <b>Q9UMZ2</b>   | SYNRG           | -0.393 | synergin gamma                                                    |
| <b>Q86TM6</b>   | SYVN1           | 0.625  | synoviolin 1                                                      |
| <b>Q15750-1</b> | TAB1            | -0.217 | TGF-beta activated kinase 1 (MAP3K7) binding protein 1            |
| <b>O75410-2</b> | TACC1           | -0.176 | transforming acidic coiled-coil containing protein 1              |
| <b>O95359</b>   | TACC2           | -0.187 | transforming acidic coiled-coil containing protein 2              |
| <b>Q9BSH4</b>   | TACO1           | 0.161  | translational activator of cytochrome c oxidase I                 |
| <b>O75528</b>   | TADA3           | 0.172  | transcriptional adaptor 3                                         |
| <b>P49848-3</b> | TAF6            | -0.152 | TATA-box binding protein associated factor 6                      |
| <b>Q15545</b>   | TAF7            | 0.138  | TATA-box binding protein associated factor 7                      |
| <b>Q727C8-4</b> | TAF8            | 0.117  | TATA-box binding protein associated factor 8                      |
| <b>Q01995</b>   | TAGLN           | -0.316 | transgelin                                                        |
| <b>P37802-2</b> | TAGLN2          | 0.225  | transgelin 2                                                      |
| <b>Q96BW9-3</b> | TAMM41          | 0.483  | TAM41 mitochondrial translocator assembly and maintenance homolog |
| <b>Q9C0B7</b>   | TANGO6          | -0.331 | transport and golgi organization 6 homolog                        |
| <b>Q03518</b>   | TAP1            | 0.416  | transporter 1, ATP binding cassette subfamily B member            |
| <b>O15533-3</b> | TAPBP           | 0.265  | TAP binding protein                                               |
| <b>P26639-2</b> | TARS1           | -0.164 | threonyl-tRNA synthetase 1                                        |
| <b>Q9BW92</b>   | TARS2           | 0.232  | threonyl-tRNA synthetase 2, mitochondrial                         |
| <b>O14907</b>   | TAX1BP3         | 0.156  | Tax1 binding protein 3                                            |
| <b>Q9BXI6-2</b> | TBC1D10A        | 0.304  | TBC1 domain family member 10A                                     |
| <b>Q9NVG8</b>   | TBC1D13         | -0.308 | TBC1 domain family member 13                                      |
| <b>Q96B29-3</b> | TBC1D20         | 0.423  | TBC1 domain family member 20                                      |
| <b>Q8WUA7</b>   | TBC1D22A        | -0.335 | TBC1 domain family member 22A                                     |
| <b>O60343-1</b> | TBC1D4          | -0.235 | TBC1 domain family member 4                                       |
| <b>Q92609-2</b> | TBC1D5          | -0.231 | TBC1 domain family member 5                                       |
| <b>O75347</b>   | TBCA            | -0.28  | tubulin folding cofactor A                                        |
| <b>Q99426</b>   | TBCB            | -0.203 | tubulin folding cofactor B                                        |
| <b>Q9BTW9-4</b> | TBCD            | -0.214 | tubulin folding cofactor D                                        |
| <b>Q15813-2</b> | TBCE            | -0.131 | tubulin folding cofactor E                                        |

|          |         |        |                                                              |
|----------|---------|--------|--------------------------------------------------------------|
| Q9BZK7   | TBL1XR1 | -0.209 | transducin beta like 1 X-linked receptor 1                   |
| Q9Y4P3   | TBL2    | 0.143  | transducin beta like 2                                       |
| Q969Z0   | TBRG4   | 0.418  | transforming growth factor beta regulator 4                  |
| O75764   | TCEA3   | -0.161 | transcription elongation factor A3                           |
| Q15170-2 | TCEAL1  | -0.269 | transcription elongation factor A like 1                     |
| Q9NUW8   | TDP1    | -0.217 | tyrosyl-DNA phosphodiesterase 1                              |
| Q9NZ01-1 | TECR    | 0.237  | trans-2,3-enoyl-CoA reductase                                |
| Q96QE5   | TEFM    | 0.477  | transcription elongation factor, mitochondrial               |
| Q9Y4R8   | TELO2   | -0.144 | telomere maintenance 2                                       |
| Q15554   | TERF2   | 0.157  | telomeric repeat binding factor 2                            |
| Q9NYB0   | TERF2IP | 0.443  | TERF2 interacting protein                                    |
| Q9UGI8   | TES     | 0.253  | testin LIM domain protein                                    |
| Q96BS2   | TESC    | -0.371 | tescalcin                                                    |
| Q9NXF1   | TEX10   | 0.188  | testis expressed 10                                          |
| Q8IWB9-2 | TEX2    | -0.196 | testis expressed 2                                           |
| P02787   | TF      | -0.282 | transferrin                                                  |
| Q00059   | TFAM    | 0.939  | transcription factor A, mitochondrial                        |
| Q9H5Q4   | TFB2M   | 0.51   | transcription factor B2, mitochondrial                       |
| Q14186   | TFDP1   | -0.17  | transcription factor Dp-1                                    |
| Q92734   | TFG     | -0.131 | trafficking from ER to golgi regulator                       |
| P10646   | TFPI    | -0.24  | tissue factor pathway inhibitor                              |
| P01137   | TGFB1   | 0.56   | transforming growth factor beta 1                            |
| P37173-2 | TGFBR2  | -0.47  | transforming growth factor beta receptor 2                   |
| Q03167   | TGFBR3  | -0.652 | transforming growth factor beta receptor 3                   |
| P21980   | TGM2    | -0.121 | transglutaminase 2                                           |
| O43493-1 | TGOLN2  | -0.229 | trans-golgi network protein 2                                |
| P07996   | THBS1   | 0.377  | thrombospondin 1                                             |
| Q96FV9   | THOC1   | 0.139  | THO complex 1                                                |
| Q13769   | THOC5   | 0.108  | THO complex 5                                                |
| Q6I9Y2   | THOC7   | -0.193 | THO complex 7                                                |
| P52888   | THOP1   | -0.279 | thimet oligopeptidase 1                                      |
| Q9NXG2   | THUMPD1 | 0.132  | THUMP domain containing 1                                    |
| Q9BV44   | THUMPD3 | -0.128 | THUMP domain containing 3                                    |
| Q9P016   | THYN1   | -0.168 | thymocyte nuclear protein 1                                  |
| Q01085-2 | TIAL1   | -0.215 | TIA1 cytotoxic granule associated RNA binding protein like 1 |
| Q9NQ88   | TIGAR   | 0.3    | TP53 induced glycolysis regulatory phosphatase               |
| P62072   | TIMM10  | 0.097  | translocase of inner mitochondrial membrane 10               |
| Q9Y5J6   | TIMM10B | -0.123 | translocase of inner mitochondrial membrane 10B              |
| Q9Y5L4   | TIMM13  | -0.253 | translocase of inner mitochondrial membrane 13               |
| Q99595   | TIMM17A | -0.465 | translocase of inner mitochondrial membrane 17A              |
| Q9BVV7   | TIMM21  | 0.302  | translocase of inner mitochondrial membrane 21               |
| O14925   | TIMM23  | -0.138 | translocase of inner mitochondrial membrane 23               |
| Q9BSF4   | TIMM29  | -0.571 | translocase of inner mitochondrial membrane 29               |
| O43615   | TIMM44  | 0.505  | translocase of inner mitochondrial membrane 44               |
| Q3ZCQ8-2 | TIMM50  | 0.21   | translocase of inner mitochondrial membrane 50               |
| Q9BWW5   | TIPIN   | -0.268 | TIMELESS interacting protein                                 |
| Q5JTD0   | TJAP1   | -0.125 | tight junction associated protein 1                          |

|                 |               |        |                                                |
|-----------------|---------------|--------|------------------------------------------------|
| <b>Q9UDY2</b>   | TJP2          | -0.326 | tight junction protein 2                       |
| <b>P04183</b>   | TK1           | 0.44   | thymidine kinase 1                             |
| <b>Q3LXA3</b>   | TKFC          | -0.415 | triokinase and FMN cyclase                     |
| <b>P29401-2</b> | TKT           | -0.086 | transketolase                                  |
| <b>Q99805</b>   | TM9SF2        | -0.196 | transmembrane 9 superfamily member 2           |
| <b>Q9HD45</b>   | TM9SF3        | 0.298  | transmembrane 9 superfamily member 3           |
| <b>Q96EY4</b>   | TMA16         | 0.17   | translation machinery associated 16 homolog    |
| <b>Q9Y2S6</b>   | TMA7          | 0.177  | translation machinery associated 7 homolog     |
| <b>Q9UM00</b>   | TMCO1         | 0.393  | transmembrane and coiled-coil domains 1        |
| <b>P49755</b>   | TMED10        | 0.158  | transmembrane p24 trafficking protein 10       |
| <b>Q9Y3A6</b>   | TMED5         | 0.378  | transmembrane p24 trafficking protein 5        |
| <b>Q9NUM4</b>   | TMEM106B      | -0.143 | transmembrane protein 106B                     |
| <b>P17152</b>   | TMEM11        | 0.332  | transmembrane protein 11                       |
| <b>Q9H061</b>   | TMEM126A      | 0.401  | transmembrane protein 126A                     |
| <b>Q9P0S9</b>   | TMEM14C       | 0.32   | transmembrane protein 14C                      |
| <b>Q9HC07</b>   | TMEM165       | 0.082  | transmembrane protein 165                      |
| <b>Q8TBQ9</b>   | TMEM167A      | 0.354  | transmembrane protein 167A                     |
| <b>Q53S58</b>   | TMEM177       | 0.359  | transmembrane protein 177                      |
| <b>Q8N511</b>   | TMEM199       | 0.298  | transmembrane protein 199                      |
| <b>Q5SNT2-1</b> | TMEM201       | 0.573  | transmembrane protein 201                      |
| <b>Q96SK2</b>   | TMEM209       | 0.298  | transmembrane protein 209                      |
| <b>Q96A57-2</b> | TMEM230       | 0.354  | transmembrane protein 230                      |
| <b>Q8WUH6</b>   | TMEM263       | 0.188  | transmembrane protein 263                      |
| <b>P57088</b>   | TMEM33        | 0.397  | transmembrane protein 33                       |
| <b>Q9BTV4</b>   | TMEM43        | 0.164  | transmembrane protein 43                       |
| <b>Q9BXS4</b>   | TMEM59        | -0.213 | transmembrane protein 59                       |
| <b>Q9BUB7</b>   | TMEM70        | 0.551  | transmembrane protein 70                       |
| <b>P42166</b>   | TMPO          | 0.218  | thymopoietin                                   |
| <b>P42167</b>   | TMPO          | 0.341  | thymopoietin                                   |
| <b>P63313</b>   | TMSB10/TMSB4X | 0.433  | thymosin beta 4 X-linked                       |
| <b>Q9H3N1</b>   | TMX1          | 0.177  | thioredoxin related transmembrane protein 1    |
| <b>Q9Y320</b>   | TMX2          | 0.246  | thioredoxin related transmembrane protein 2    |
| <b>Q9H1E5</b>   | TMX4          | 0.277  | thioredoxin related transmembrane protein 4    |
| <b>O00220</b>   | TNFRSF10A     | 0.421  | TNF receptor superfamily member 10a            |
| <b>O14763</b>   | TNFRSF10B     | 0.168  | TNF receptor superfamily member 10b            |
| <b>Q9C0C2</b>   | TNKS1BP1      | -0.123 | tankyrase 1 binding protein 1                  |
| <b>O14787-2</b> | TNPO2         | -0.231 | transportin 2                                  |
| <b>Q8NDV7</b>   | TNRC6A        | -0.137 | trinucleotide repeat containing adaptor 6A     |
| <b>Q68CZ2-1</b> | TNS3          | -0.333 | tensin 3                                       |
| <b>O60784</b>   | TOM1          | -0.327 | target of myb1 membrane trafficking protein    |
| <b>Q9NS69</b>   | TOMM22        | 0.156  | translocase of outer mitochondrial membrane 22 |
| <b>Q15785</b>   | TOMM34        | 0.269  | translocase of outer mitochondrial membrane 34 |
| <b>O96008</b>   | TOMM40        | 0.134  | translocase of outer mitochondrial membrane 40 |
| <b>Q8N4H5</b>   | TOMM5         | 0.233  | translocase of outer mitochondrial membrane 5  |
| <b>O94826</b>   | TOMM70        | 0.196  | translocase of outer mitochondrial membrane 70 |
| <b>P11387</b>   | TOP1          | 0.629  | DNA topoisomerase I                            |
| <b>P11388-4</b> | TOP2A         | 0.69   | DNA topoisomerase II alpha                     |

|          |          |        |                                                                                     |
|----------|----------|--------|-------------------------------------------------------------------------------------|
| Q02880   | TOP2B    | 0.436  | DNA topoisomerase II beta                                                           |
| O14656   | TOR1A    | 0.175  | torsin family 1 member A                                                            |
| Q5JTV8   | TOR1AIP1 | 0.402  | torsin 1A interacting protein 1                                                     |
| Q8NFQ8   | TOR1AIP2 | 0.293  | torsin 1A interacting protein 2                                                     |
| O14657   | TOR1B    | 0.131  | torsin family 1 member B                                                            |
| O94842   | TOX4     | 0.229  | TOX high mobility group box family member 4                                         |
| P04637   | TP53     | 1.04   | tumor protein p53                                                                   |
| Q53FA7   | TP53I3   | 0.428  | tumor protein p53 inducible protein 3                                               |
| P55327-3 | TPD52    | -0.403 | tumor protein D52                                                                   |
| P60174   | TPI1     | -0.186 | triosephosphate isomerase 1                                                         |
| P09493-2 | TPM1     | -0.375 | tropomyosin 1                                                                       |
| P67936   | TPM4     | -0.179 | tropomyosin 4                                                                       |
| Q9ULW0   | TPX2     | 0.802  | TPX2 microtubule nucleation factor                                                  |
| Q13595   | TRA2A    | 0.183  | transformer 2 alpha homolog                                                         |
| P62995   | TRA2B    | 0.267  | transformer 2 beta homolog                                                          |
| Q9H4I3-1 | TRABD    | 0.215  | TraB domain containing                                                              |
| Q12931   | TRAP1    | 0.295  | TNF receptor associated protein 1                                                   |
| O43617-1 | TRAPPC3  | -0.167 | trafficking protein particle complex 3                                              |
| Q9Y296   | TRAPPC4  | 0.182  | trafficking protein particle complex 4                                              |
| Q8IURO   | TRAPPC5  | 0.105  | trafficking protein particle complex 5                                              |
| Q86S22   | TRAPPC6B | -0.207 | trafficking protein particle complex 6B                                             |
| O15164   | TRIM24   | -0.26  | tripartite motif containing 24                                                      |
| Q14258   | TRIM25   | -0.121 | tripartite motif containing 25                                                      |
| Q12899   | TRIM26   | 0.191  | tripartite motif containing 26                                                      |
| P14373   | TRIM27   | -0.166 | tripartite motif containing 27                                                      |
| Q13263   | TRIM28   | 0.274  | tripartite motif containing 28                                                      |
| Q9UPN9-1 | TRIM33   | -0.319 | tripartite motif containing 33                                                      |
| O75962-1 | TRIO     | -0.798 | trio Rho guanine nucleotide exchange factor                                         |
| Q9H2D6   | TRIOBP   | 0.195  | TRIO and F-actin binding protein                                                    |
| Q15642   | TRIP10   | -0.181 | thyroid hormone receptor interactor 10                                              |
| Q15643   | TRIP11   | 0.188  | thyroid hormone receptor interactor 11                                              |
| Q15645   | TRIP13   | -0.176 | thyroid hormone receptor interactor 13                                              |
| Q15650   | TRIP4    | -0.424 | thyroid hormone receptor interactor 4                                               |
| Q9BQ61   | TRIR     | -0.399 | telomerase RNA component interacting RNase                                          |
| Q7L0Y3   | TRMT10C  | 0.559  | tRNA methyltransferase 10C, mitochondrial RNase P subunit                           |
| Q8IZ69   | TRMT2A   | -0.296 | tRNA methyltransferase 2 homolog A                                                  |
| O75648   | TRMU     | 0.242  | tRNA 5-methylaminomethyl-2-thiouridylate methyltransferase                          |
| Q8TEL6   | TRPC4AP  | -0.364 | transient receptor potential cation channel subfamily C member 4 associated protein |
| O95900   | TRUB2    | 0.173  | TruB pseudouridine synthase family member 2                                         |
| Q15631-1 | TSN      | -0.205 | translin                                                                            |
| Q99598   | TSNAX    | -0.087 | translin associated factor X                                                        |
| Q9H0U9   | TSPYL1   | 0.46   | TSPY like 1                                                                         |
| Q9H2G4   | TSPYL2   | 0.961  | TSPY like 2                                                                         |
| Q16762   | TST      | 0.394  | thiosulfate sulfurtransferase                                                       |
| Q13630   | TSTA3    | -0.208 | tissue specific transplantation antigen P35B                                        |
| Q99614   | TTC1     | -0.23  | tetratricopeptide repeat domain 1                                                   |
| Q96AE7-2 | TTC17    | -0.18  | tetratricopeptide repeat domain 17                                                  |

|          |               |        |                                                                |
|----------|---------------|--------|----------------------------------------------------------------|
| Q6P3X3   | TTC27         | -0.474 | tetratricopeptide repeat domain 27                             |
| Q5R3I4   | TTC38         | -0.486 | tetratricopeptide repeat domain 38                             |
| Q14166   | TTL12         | -0.235 | tubulin tyrosine ligase like 12                                |
| Q9BTX7   | TTPAL         | -0.371 | alpha tocopherol transfer protein like                         |
| P68366   | TUBA4A        | 0.394  | tubulin alpha 4a                                               |
| P07437   | TUBB          | -0.074 | tubulin beta class I                                           |
| Q13885   | TUBB2A        | 0.38   | tubulin beta 2A class IIa                                      |
| Q13509   | TUBB3         | 0.24   | tubulin beta 3 class III                                       |
| Q9BUF5   | TUBB6         | 0.498  | tubulin beta 6 class V                                         |
| Q9BSJ2-4 | TUBGCP2       | -0.09  | tubulin gamma complex associated protein 2                     |
| Q96CW5   | TUBGCP3       | -0.123 | tubulin gamma complex associated protein 3                     |
| P49411   | TUFM          | 0.308  | Tu translation elongation factor, mitochondrial                |
| O75896   | TUSC2         | 0.175  | tumor suppressor 2, mitochondrial calcium regulator            |
| Q5TAX3   | TUT4          | -0.251 | terminal uridylyl transferase 4                                |
| Q96RR1   | TWNK          | 0.314  | twinkle mtDNA helicase                                         |
| P10599-1 | TXN           | -0.227 | thioredoxin                                                    |
| Q99757   | TXN2          | 0.878  | thioredoxin 2                                                  |
| Q96J42-1 | TXNDC15       | -0.205 | thioredoxin domain containing 15                               |
| Q9BRA2   | TXNDC17       | -0.183 | thioredoxin domain containing 17                               |
| O14530   | TXNDC9        | 0.232  | thioredoxin domain containing 9                                |
| O43396   | TXNL1         | -0.114 | thioredoxin like 1                                             |
| P83876   | TXNL4A        | -0.376 | thioredoxin like 4A                                            |
| Q9NX01   | TXNL4B        | 0.38   | thioredoxin like 4B                                            |
| P19971-2 | TYMP          | -0.478 | thymidine phosphorylase                                        |
| P04818   | TYMS          | 0.172  | thymidylate synthetase                                         |
| Q2T9J0   | TYSND1        | -0.401 | trypsin domain containing 1                                    |
| Q01081   | U2AF1/U2AF1L5 | 0.155  | U2 small nuclear RNA auxiliary factor 1                        |
| P26368   | U2AF2         | -0.099 | U2 small nuclear RNA auxiliary factor 2                        |
| Q9BZF9   | UACA          | -0.226 | uveal autoantigen with coiled-coil domains and ankyrin repeats |
| Q3KQV9   | UAP1L1        | -0.255 | UDP-N-acetylglucosamine pyrophosphorylase 1 like 1             |
| P22314   | UBA1          | -0.169 | ubiquitin like modifier activating enzyme 1                    |
| Q9UBT2   | UBA2          | -0.174 | ubiquitin like modifier activating enzyme 2                    |
| Q8TBC4-1 | UBA3          | -0.12  | ubiquitin like modifier activating enzyme 3                    |
| Q9GZZ9-1 | UBA5          | -0.212 | ubiquitin like modifier activating enzyme 5                    |
| A0AVT1-1 | UBA6          | -0.125 | ubiquitin like modifier activating enzyme 6                    |
| Q9BSL1   | UBAC1         | -0.364 | UBA domain containing 1                                        |
| Q5T6F2   | UBAP2         | -0.159 | ubiquitin associated protein 2                                 |
| O00762   | UBE2C         | 0.083  | ubiquitin conjugating enzyme E2 C                              |
| P51965-1 | UBE2E1        | -0.395 | ubiquitin conjugating enzyme E2 E1                             |
| Q969T4   | UBE2E3        | -0.449 | ubiquitin conjugating enzyme E2 E3                             |
| P62253   | UBE2G1        | -0.199 | ubiquitin conjugating enzyme E2 G1                             |
| P63279   | UBE2I         | -0.189 | ubiquitin conjugating enzyme E2 I                              |
| P61086   | UBE2K         | -0.348 | ubiquitin conjugating enzyme E2 K                              |
| P68036   | UBE2L3        | -0.295 | ubiquitin conjugating enzyme E2 L3                             |
| P61081   | UBE2M         | -0.205 | ubiquitin conjugating enzyme E2 M                              |
| P61088   | UBE2N         | -0.321 | ubiquitin conjugating enzyme E2 N                              |
| Q9C0C9   | UBE2O         | -0.194 | ubiquitin conjugating enzyme E2 O                              |

|          |           |        |                                                                    |
|----------|-----------|--------|--------------------------------------------------------------------|
| Q712K3   | UBE2R2    | -0.359 | ubiquitin conjugating enzyme E2 R2                                 |
| Q16763   | UBE2S     | 0.859  | ubiquitin conjugating enzyme E2 S                                  |
| Q9NPD8   | UBE2T     | -0.152 | ubiquitin conjugating enzyme E2 T                                  |
| Q13404-1 | UBE2V1    | -0.299 | ubiquitin conjugating enzyme E2 V1                                 |
| Q15386-1 | UBE3C     | -0.23  | ubiquitin protein ligase E3C                                       |
| Q14139-2 | UBE4A     | -0.212 | ubiquitination factor E4A                                          |
| O95155-4 | UBE4B     | -0.309 | ubiquitination factor E4B                                          |
| P11441   | UBL4A     | -0.147 | ubiquitin like 4A                                                  |
| Q96S82   | UBL7      | -0.316 | ubiquitin like 7                                                   |
| Q8WVY7   | UBLCP1    | -0.315 | ubiquitin like domain containing CTD phosphatase 1                 |
| Q9UMX0-1 | UBQLN1    | -0.139 | ubiquilin 1                                                        |
| Q9NRR5   | UBQLN4    | -0.276 | ubiquilin 4                                                        |
| Q8I WV7  | UBR1      | -0.304 | ubiquitin protein ligase E3 component n-recognin 1                 |
| Q8I WV8  | UBR2      | -0.2   | ubiquitin protein ligase E3 component n-recognin 2                 |
| Q5T4S7-2 | UBR4      | -0.264 | ubiquitin protein ligase E3 component n-recognin 4                 |
| Q8N806   | UBR7      | -0.203 | ubiquitin protein ligase E3 component n-recognin 7 (putative)      |
| Q04323-1 | UBXN1     | -0.261 | UBX domain protein 1                                               |
| Q92575   | UBXN4     | 0.183  | UBX domain protein 4                                               |
| Q9BZX2-1 | UCK2      | -0.13  | uridine-cytidine kinase 2                                          |
| Q9Y3C8   | UFC1      | -0.191 | ubiquitin-fold modifier conjugating enzyme 1                       |
| Q9NUQ7   | UFSP2     | 0.187  | UFM1 specific peptidase 2                                          |
| O60701   | UGDH      | -0.092 | UDP-glucose 6-dehydrogenase                                        |
| Q16851   | UGP2      | -0.128 | UDP-glucose pyrophosphorylase 2                                    |
| P16662   | UGT2B7    | 0.581  | UDP glucuronosyltransferase family 2 member B7                     |
| Q96T88-2 | UHRF1     | -0.445 | ubiquitin like with PHD and ring finger domains 1                  |
| Q6BDS2   | UHRF1BP1  | -0.181 | UHRF1 binding protein 1                                            |
| A0JNW5   | UHRF1BP1L | -0.263 | UHRF1 binding protein 1 like                                       |
| Q96RL1   | UIMC1     | -0.151 | ubiquitin interaction motif containing 1                           |
| Q70J99-3 | UNC13D    | -0.262 | unc-13 homolog D                                                   |
| Q92900   | UPF1      | -0.119 | UPF1 RNA helicase and ATPase                                       |
| Q9HAU5   | UPF2      | -0.178 | UPF2 regulator of nonsense mediated mRNA decay                     |
| Q9BZ17-1 | UPF3B     | 0.227  | UPF3B regulator of nonsense mediated mRNA decay                    |
| Q9BRT2   | UQCC2     | -0.132 | ubiquinol-cytochrome c reductase complex assembly factor 2         |
| P31930   | UQCRC1    | 0.276  | ubiquinol-cytochrome c reductase core protein 1                    |
| P47985   | UQCDFS1   | 0.18   | ubiquinol-cytochrome c reductase, Rieske iron-sulfur polypeptide 1 |
| O14949   | UQCRCQ    | 0.301  | ubiquinol-cytochrome c reductase complex III subunit VII           |
| Q8TCY9   | URGCP     | 0.151  | upregulator of cell proliferation                                  |
| P06132   | UROD      | -0.322 | uroporphyrinogen decarboxylase                                     |
| O60763-1 | USO1      | -0.175 | USO1 vesicle transport factor                                      |
| O60763-2 | USO1      | -0.3   | USO1 vesicle transport factor                                      |
| Q14694-2 | USP10     | -0.178 | ubiquitin specific peptidase 10                                    |
| Q92995   | USP13     | -0.364 | ubiquitin specific peptidase 13                                    |
| P54578   | USP14     | -0.134 | ubiquitin specific peptidase 14                                    |
| O94966-5 | USP19     | 0.144  | ubiquitin specific peptidase 19                                    |
| Q9UPU5   | USP24     | -0.155 | ubiquitin specific peptidase 24                                    |
| Q96RU2-2 | USP28     | -0.191 | ubiquitin specific peptidase 28                                    |
| Q9Y614   | USP3      | 0.121  | ubiquitin specific peptidase 3                                     |

|          |         |        |                                                                                   |
|----------|---------|--------|-----------------------------------------------------------------------------------|
| Q8NFA0   | USP32   | -0.421 | ubiquitin specific peptidase 32                                                   |
| Q8TEY7   | USP33   | -0.413 | ubiquitin specific peptidase 33                                                   |
| Q70CQ2   | USP34   | -0.298 | ubiquitin specific peptidase 34                                                   |
| Q96K76   | USP47   | -0.166 | ubiquitin specific peptidase 47                                                   |
| Q86UV5-8 | USP48   | -0.358 | ubiquitin specific peptidase 48                                                   |
| P45974-1 | USP5    | -0.159 | ubiquitin specific peptidase 5                                                    |
| Q93009   | USP7    | -0.123 | ubiquitin specific peptidase 7                                                    |
| P40818   | USP8    | -0.088 | ubiquitin specific peptidase 8                                                    |
| Q93008   | USP9X   | -0.247 | ubiquitin specific peptidase 9 X-linked                                           |
| Q9BVJ6-1 | UTP14A  | -0.347 | UTP14A small subunit processome component                                         |
| Q8TED0   | UTP15   | 0.206  | UTP15 small subunit processome component                                          |
| Q68CQ4   | UTP25   | 0.157  | UTP25 small subunit processor component                                           |
| Q9NQZ2   | UTP3    | 0.501  | UTP3 small subunit processome component                                           |
| Q969X6   | UTP4    | 0.314  | UTP4 small subunit processome component                                           |
| P46939   | UTRN    | -0.103 | utrophin                                                                          |
| Q08AM6   | VAC14   | -0.337 | VAC14 component of PIKFYVE complex                                                |
| P51809   | VAMP7   | 0.172  | vesicle associated membrane protein 7                                             |
| Q9BV40   | VAMP8   | 0.185  | vesicle associated membrane protein 8                                             |
| Q9P0L0-2 | VAPA    | 0.401  | VAMP associated protein A                                                         |
| O95292   | VAPB    | 0.191  | VAMP associated protein B and C                                                   |
| P26640   | VARS    | -0.179 | valyl-tRNA synthetase 1                                                           |
| Q6EMK4   | VASN    | -0.405 | vasorin                                                                           |
| Q99536   | VAT1    | -0.17  | vesicle amine transport 1                                                         |
| P52735   | VAV2    | -0.362 | vav guanine nucleotide exchange factor 2                                          |
| P52735-2 | VAV2    | -0.421 | vav guanine nucleotide exchange factor 2                                          |
| P61758   | VBP1    | -0.212 | VHL binding protein 1                                                             |
| P18206   | VCL     | -0.386 | vinculin                                                                          |
| P21796   | VDAC1   | 0.319  | voltage dependent anion channel 1                                                 |
| P45880-1 | VDAC2   | 0.532  | voltage dependent anion channel 2                                                 |
| Q9Y277-2 | VDAC3   | 0.289  | voltage dependent anion channel 3                                                 |
| Q9H9C1-1 | VIPAS39 | -0.427 | VPS33B interacting protein, apical-basolateral polarity regulator, spe-39 homolog |
| Q69YN4   | VIRMA   | 0.199  | vir like m6A methyltransferase associated                                         |
| Q9BRG1   | VPS25   | -0.217 | vacuolar protein sorting 25 homolog                                               |
| O75436   | VPS26A  | -0.075 | VPS26, retromer complex component A                                               |
| Q4G0F5   | VPS26B  | -0.181 | VPS26, retromer complex component B                                               |
| Q9UK41-1 | VPS28   | -0.228 | VPS28 subunit of ESCRT-I                                                          |
| Q9UBQ0   | VPS29   | -0.285 | VPS29 retromer complex component                                                  |
| Q96QK1   | VPS35   | -0.303 | VPS35 retromer complex component                                                  |
| Q86VN1   | VPS36   | -0.14  | vacuolar protein sorting 36 homolog                                               |
| Q96JG6   | VPS50   | -0.364 | VPS50 subunit of EARP/GARPII complex                                              |
| Q9UID3-1 | VPS51   | -0.102 | VPS51 subunit of GARP complex                                                     |
| Q5VIR6-4 | VPS53   | -0.36  | VPS53 subunit of GARP complex                                                     |
| P62760   | VSNL1   | -0.467 | visinin like 1                                                                    |
| P23381   | WARS1   | -0.375 | tryptophanyl-tRNA synthetase 1                                                    |
| Q9UGM6   | WARS2   | 0.285  | tryptophanyl tRNA synthetase 2, mitochondrial                                     |
| Q9Y6W5   | WASF2   | -0.097 | WASP family member 2                                                              |
| Q2M389   | WASHC4  | -0.25  | WASH complex subunit 4                                                            |

|                 |         |        |                                                                 |
|-----------------|---------|--------|-----------------------------------------------------------------|
| <b>Q12768</b>   | WASHC5  | -0.357 | WASH complex subunit 5                                          |
| <b>Q9H6R7</b>   | WDCP    | -0.17  | WD repeat and coiled coil containing                            |
| <b>O75717</b>   | WDHD1   | -0.174 | WD repeat and HMG-box DNA binding protein 1                     |
| <b>Q9BZH6</b>   | WDR11   | -0.192 | WD repeat domain 11                                             |
| <b>Q9GZL7</b>   | WDR12   | -0.252 | WD repeat domain 12                                             |
| <b>Q9H7D7</b>   | WDR26   | 0.102  | WD repeat domain 26                                             |
| <b>Q9UNX4</b>   | WDR3    | 0.263  | WD repeat domain 3                                              |
| <b>Q9C0J8</b>   | WDR33   | -0.078 | WD repeat domain 33                                             |
| <b>Q8NI36</b>   | WDR36   | 0.185  | WD repeat domain 36                                             |
| <b>Q9Y2I8-2</b> | WDR37   | -0.232 | WD repeat domain 37                                             |
| <b>Q15061</b>   | WDR43   | 0.171  | WD repeat domain 43                                             |
| <b>Q8TAF3-1</b> | WDR48   | -0.105 | WD repeat domain 48                                             |
| <b>P61964</b>   | WDR5    | 0.177  | WD repeat domain 5                                              |
| <b>Q9NW82</b>   | WDR70   | -0.257 | WD repeat domain 70                                             |
| <b>Q8IWA0</b>   | WDR75   | 0.138  | WD repeat domain 75                                             |
| <b>Q9BQA1</b>   | WDR77   | -0.148 | WD repeat domain 77                                             |
| <b>Q562E7</b>   | WDR81   | -0.099 | WD repeat domain 81                                             |
| <b>A4D1P6</b>   | WDR91   | -0.205 | WD repeat domain 91                                             |
| <b>Q8N9V3</b>   | WDSUB1  | -0.355 | WD repeat, sterile alpha motif and U-box domain containing 1    |
| <b>O76024</b>   | WFS1    | -0.14  | wolframin ER transmembrane glycoprotein                         |
| <b>Q9Y3S1</b>   | WNK2    | -1.031 | WNK lysine deficient protein kinase 2                           |
| <b>Q9BUR4</b>   | WRAP53  | -0.155 | WD repeat containing antisense to TP53                          |
| <b>Q15007</b>   | WTAP    | 0.275  | WT1 associated protein                                          |
| <b>O00308</b>   | WWP2    | -0.601 | WW domain containing E3 ubiquitin protein ligase 2              |
| <b>Q9HCS7</b>   | XAB2    | 0.195  | XPA binding protein 2                                           |
| <b>P98170</b>   | XIAP    | -0.504 | X-linked inhibitor of apoptosis                                 |
| <b>Q01831</b>   | XPC     | 0.374  | XPC complex subunit, DNA damage recognition and repair factor   |
| <b>Q9NQW7-3</b> | XPNPEP1 | -0.13  | X-prolyl aminopeptidase 1                                       |
| <b>O14980</b>   | XPO1    | -0.17  | exportin 1                                                      |
| <b>Q9C0E2</b>   | XPO4    | -0.439 | exportin 4                                                      |
| <b>Q9HAV4</b>   | XPO5    | -0.192 | exportin 5                                                      |
| <b>Q9UIA9</b>   | XPO7    | -0.175 | exportin 7                                                      |
| <b>O43592</b>   | XPOT    | -0.234 | exportin for tRNA                                               |
| <b>Q13426</b>   | XRCC4   | -0.371 | X-ray repair cross complementing 4                              |
| <b>P13010</b>   | XRCC5   | -0.089 | X-ray repair cross complementing 5                              |
| <b>O75191</b>   | XYLB    | -0.322 | xylulokinase                                                    |
| <b>P46937-9</b> | YAP1    | -0.142 | Yes associated protein 1                                        |
| <b>P54577</b>   | YARS1   | -0.275 | tyrosyl-tRNA synthetase 1                                       |
| <b>Q9Y2Z4</b>   | YARS2   | 0.392  | tyrosyl-tRNA synthetase 2                                       |
| <b>P67809</b>   | YBX1    | -0.557 | Y-box binding protein 1                                         |
| <b>P16989</b>   | YBX3    | -0.325 | Y-box binding protein 3                                         |
| <b>O95619</b>   | YEATS4  | -0.182 | YEATS domain containing 4                                       |
| <b>P07947</b>   | YES1    | 0.139  | YES proto-oncogene 1, Src family tyrosine kinase                |
| <b>Q5BJH7</b>   | YIF1B   | 0.254  | Yip1 interacting factor homolog B, membrane trafficking protein |
| <b>Q9BW85</b>   | YJU2    | -0.142 | YJU2 splicing factor homolog                                    |
| <b>O15498</b>   | YKT6    | 0.343  | YKT6 v-SNARE homolog                                            |
| <b>Q96TA2-1</b> | YME1L1  | 0.275  | YME1 like 1 ATPase                                              |

|          |          |        |                                                                                |
|----------|----------|--------|--------------------------------------------------------------------------------|
| Q86U90   | YRDC     | 0.34   | yrnC N6-threonylcarbamoyltransferase domain containing                         |
| Q96MU7-1 | YTHDC1   | 0.237  | YTH domain containing 1                                                        |
| Q9H6S0   | YTHDC2   | -0.199 | YTH domain containing 2                                                        |
| Q9Y5A9   | YTHDF2   | -0.343 | YTH N6-methyladenosine RNA binding protein 2                                   |
| P62258   | YWHAE    | -0.284 | tyrosine 3-monooxygenase/tryptophan 5-monooxygenase activation protein epsilon |
| P25490   | YY1      | 0.272  | YY1 transcription factor                                                       |
| Q8N4Q0   | ZADH2    | 0.298  | zinc binding alcohol dehydrogenase domain containing 2                         |
| O96006   | ZBED1    | -0.527 | zinc finger BED-type containing 1                                              |
| O95625   | ZBTB11   | 0.427  | zinc finger and BTB domain containing 11                                       |
| O43829   | ZBTB14   | -0.397 | zinc finger and BTB domain containing 14                                       |
| Q96GY0   | ZC2HC1A  | 0.335  | zinc finger C2HC-type containing 1A                                            |
| O75152   | ZC3H11A  | 0.428  | zinc finger CCCH-type containing 11A                                           |
| Q8WU90   | ZC3H15   | -0.339 | zinc finger CCCH-type containing 15                                            |
| Q86VM9   | ZC3H18   | 0.095  | zinc finger CCCH-type containing 18                                            |
| Q722W4   | ZC3HAV1  | 0.318  | zinc finger CCCH-type containing, antiviral 1                                  |
| Q86WB0   | ZC3HC1   | -0.309 | zinc finger C3HC-type containing 1                                             |
| Q9C0B9   | ZCCHC2   | -0.253 | zinc finger CCHC-type containing 2                                             |
| Q9C0B5   | ZDHHCS   | 0.159  | zinc finger DHHC-type containing 5                                             |
| Q15911-1 | ZFH3     | -0.343 | zinc finger homeobox 3                                                         |
| Q07352   | ZFP36L1  | 0.778  | ZFP36 ring finger protein like 1                                               |
| Q96KR1   | ZFR      | -0.097 | zinc finger RNA binding protein                                                |
| Q8N5A5   | ZGPAT    | 0.278  | zinc finger CCCH-type and G-patch domain containing                            |
| Q9Y6X8   | ZHX2     | -0.238 | zinc fingers and homeoboxes 2                                                  |
| P17029   | ZKSCAN1  | 0.322  | zinc finger with KRAB and SCAN domains 1                                       |
| O75844   | ZMPSTE24 | 0.205  | zinc metalloproteinase STE24                                                   |
| Q14202   | ZMYM3    | -0.416 | zinc finger MYM-type containing 3                                              |
| O75362   | ZNF217   | 0.086  | zinc finger protein 217                                                        |
| P17028-1 | ZNF24    | 0.241  | zinc finger protein 24                                                         |
| Q8ND82   | ZNF280C  | 0.335  | zinc finger protein 280C                                                       |
| Q9Y2X9   | ZNF281   | 0.244  | zinc finger protein 281                                                        |
| Q5BKZ1   | ZNF326   | 0.255  | zinc finger protein 326                                                        |
| Q9Y3S2   | ZNF330   | 0.398  | zinc finger protein 330                                                        |
| Q8TF68-2 | ZNF384   | 0.308  | zinc finger protein 384                                                        |
| Q92610   | ZNF592   | 0.133  | zinc finger protein 592                                                        |
| Q86UK7   | ZNF598   | -0.178 | zinc finger protein 598                                                        |
| Q969S3   | ZNF622   | 0.48   | zinc finger protein 622                                                        |
| Q14966   | ZNF638   | 0.24   | zinc finger protein 638                                                        |
| Q9H582   | ZNF644   | -0.223 | zinc finger protein 644                                                        |
| Q8N1G0   | ZNF687   | 0.346  | zinc finger protein 687                                                        |
| Q2TB10   | ZNF800   | 0.972  | zinc finger protein 800                                                        |
| Q9P2E3   | ZNFX1    | 0.337  | zinc finger NFX1-type containing 1                                             |
| O75312   | ZPR1     | -0.172 | ZPR1 zinc finger                                                               |
| O95218-1 | ZRANBP2  | -0.364 | zinc finger RANBP2-type containing 2                                           |
| Q9H900-1 | ZWILCH   | -0.19  | zwilch kinetochore protein                                                     |
| Q9C0D3   | ZYG11B   | -0.153 | zyg-11 family member B, cell cycle regulator                                   |
| O43149   | ZZEF1    | -0.338 | zinc finger ZZ-type and EF-hand domain containing 1                            |
| F8W031   |          | 0.189  |                                                                                |

|          |  |        |  |
|----------|--|--------|--|
| H0YIV9   |  | -0.188 |  |
| P00761   |  | 0.493  |  |
| P04908   |  | 1.037  |  |
| P30042   |  | 0.233  |  |
| P62158   |  | -0.362 |  |
| P62805   |  | 0.789  |  |
| P69905   |  | 1.653  |  |
| P84243   |  | 0.835  |  |
| Q15269   |  | 0.233  |  |
| Q16637   |  | 0.289  |  |
| Q6FI13   |  | 0.768  |  |
| Q6NSW5   |  | -0.474 |  |
| Q96JG8-4 |  | 0.189  |  |
| Q9BV94-1 |  | -0.396 |  |
