# Supplementary material for: Elucidating the cellular response of silver nanoparticles as a potential combinatorial agent for cisplatin chemotherapy
Source: PubMed Central journal article supplement (PMC7654574; doi:10.1186/s12951-020-00719-x), 2020-11-10
Supplement: 12951_2020_719_MOESM3_ESM.pdf [file 12951_2020_719_MOESM3_ESM.pdf]

**Elucidating the cellular response of silver nanoparticles as a potential combinatorial agent for cisplatin chemotherapy**

**Additional File 3**

List of proteins deregulated in THLE2 cells after 24h exposure to CDDP 10  $\mu$ M..... pages 1 – 18

List of proteins deregulated in THLE2 cells after 24h exposure to AgNP 3.5  $\mu$ g/mL + CDDP 10  $\mu$ M ..... pages 19 – 48

List of proteins deregulated in THLE2 cells after 24h exposure to CDDP 10 mM

| ID       | Symbol                 | Expr Log Ratio | Entrez Gene Name                                                        |
|----------|------------------------|----------------|-------------------------------------------------------------------------|
| Q2M2I8   | AAK1                   | -0.214         | AP2 associated kinase 1                                                 |
| Q9NRN7   | AASDHPPT               | 0.23           | aminoadipate-semialdehyde dehydrogenase-phosphopantetheinyl transferase |
| P33897   | ABCD1                  | 0.27           | ATP binding cassette subfamily D member 1                               |
| Q9NUJ1   | ABHD10                 | 0.203          | abhydrolase domain containing 10                                        |
| Q12979   | ABR                    | -0.213         | ABR activator of RhoGEF and GTPase                                      |
| Q9ULW3   | ABT1                   | -0.231         | activator of basal transcription 1                                      |
| P42765   | ACAA2                  | 0.189          | acetyl-CoA acyltransferase 2                                            |
| Q13085-4 | ACACA                  | -0.263         | acetyl-CoA carboxylase alpha                                            |
| Q9UKV3-5 | ACIN1                  | 0.152          | apoptotic chromatin condensation inducer 1                              |
| Q86TX2   | ACOT1                  | 0.259          | acyl-CoA thioesterase 1                                                 |
| P11117   | ACP2                   | 0.198          | acid phosphatase 2, lysosomal                                           |
| P33121   | ACSL1                  | 0.153          | acyl-CoA synthetase long chain family member 1                          |
| O43707   | ACTN4                  | -0.235         | actinin alpha 4                                                         |
| O14672   | ADAM10                 | -0.219         | ADAM metallopeptidase domain 10                                         |
| P11766   | ADH5                   | 0.196          | alcohol dehydrogenase 5 (class III), chi polypeptide                    |
| Q16186   | ADRM1                  | 0.187          | adhesion regulating molecule 1                                          |
| Q8N556-2 | AFAP1                  | -0.311         | actin filament associated protein 1                                     |
| Q9UHB7-1 | AFF4                   | 0.185          | AF4/FMR2 family member 4                                                |
| O00468   | AGRN                   | -0.381         | agrin                                                                   |
| Q9BRQ8   | AIFM2                  | 0.274          | apoptosis inducing factor mitochondria associated 2                     |
| Q9UIJ7-1 | AK3                    | 0.223          | adenylate kinase 3                                                      |
| P27144   | AK4                    | 0.129          | adenylate kinase 4                                                      |
| Q9UKA4   | AKAP11                 | -0.233         | A-kinase anchoring protein 11                                           |
| Q02952-1 | AKAP12                 | -0.274         | A-kinase anchoring protein 12                                           |
| O43488   | AKR7A2                 | 0.182          | aldo-keto reductase family 7 member A2                                  |
| Q13740   | ALCAM                  | -0.225         | activated leukocyte cell adhesion molecule                              |
| P30837   | ALDH1B1                | 0.178          | aldehyde dehydrogenase 1 family member B1                               |
| P49189   | ALDH9A1                | 0.192          | aldehyde dehydrogenase 9 family member A1                               |
| Q86SJ2   | AMIGO2                 | -0.162         | adhesion molecule with Ig like domain 2                                 |
| Q9BY76   | ANGPTL4                | -0.664         | angiopoietin like 4                                                     |
| Q8IWZ3-6 | ANKHD1/ANKHD1-EIF4EBP3 | -0.183         | ankyrin repeat and KH domain containing 1                               |
| Q9NQW6   | ANLN                   | 0.349          | anillin actin binding protein                                           |
| P58335-1 | ANTXR2                 | -0.688         | ANTXR cell adhesion molecule 2                                          |
| P07355-2 | ANXA2                  | -0.233         | annexin A2                                                              |
| Q06481   | APLP2                  | -0.285         | amyloid beta precursor like protein 2                                   |
| Q9NRW3   | APOBEC3C               | 0.41           | apolipoprotein B mRNA editing enzyme catalytic subunit 3C               |
| P05067   | APP                    | -0.644         | amyloid beta precursor protein                                          |
| Q96P48-6 | ARAP1                  | -0.184         | ArfGAP with RhoGAP domain, ankyrin repeat and PH domain 1               |

|          |          |        |                                                                    |
|----------|----------|--------|--------------------------------------------------------------------|
| A1A4S6   | ARHGAP10 | -0.387 | Rho GTPase activating protein 10                                   |
| Q8N392   | ARHGAP18 | -0.247 | Rho GTPase activating protein 18                                   |
| O15013   | ARHGEF10 | -0.257 | Rho guanine nucleotide exchange factor 10                          |
| Q9NZN5   | ARHGEF12 | -0.198 | Rho guanine nucleotide exchange factor 12                          |
| Q8NFD5-3 | ARID1B   | -0.481 | AT-rich interaction domain 1B                                      |
| O43150-1 | ASAP2    | -0.225 | ArfGAP with SH3 domain, ankyrin repeat and PH domain 2             |
| Q8N9N2-2 | ASCC1    | -0.605 | activating signal cointegrator 1 complex subunit 1                 |
| Q9H1I8-1 | ASCC2    | -0.496 | activating signal cointegrator 1 complex subunit 2                 |
| Q8N3C0   | ASCC3    | -0.55  | activating signal cointegrator 1 complex subunit 3                 |
| Q9NVP2   | ASF1B    | 0.261  | anti-silencing function 1B histone chaperone                       |
| O95352   | ATG7     | -0.276 | autophagy related 7                                                |
| O00244   | ATOX1    | 0.312  | antioxidant 1 copper chaperone                                     |
| P05026   | ATP1B1   | 0.163  | ATPase Na <sup>+</sup> /K <sup>+</sup> transporting subunit beta 1 |
| P23634-1 | ATP2B4   | -0.22  | ATPase plasma membrane Ca <sup>2+</sup> transporting 4             |
| P56381   | ATP5F1E  | 0.327  | ATP synthase F1 subunit epsilon                                    |
| Q9UII2   | ATP5IF1  | 0.443  | ATP synthase inhibitory factor subunit 1                           |
| P0C7T5   | ATXN1L   | 0.311  | ataxin 1 like                                                      |
| Q96GD4-5 | AURKB    | 0.266  | aurora kinase B                                                    |
| P30530   | AXL      | -0.357 | AXL receptor tyrosine kinase                                       |
| P61769   | B2M      | 0.254  | beta-2-microglobulin                                               |
| Q9NXR7-2 | BABAM2   | -0.197 | BRISC and BRCA1 A complex member 2                                 |
| O95816   | BAG2     | 0.175  | BCL2 associated athanogene 2                                       |
| Q8WY36   | BBX      | -0.39  | BBX high mobility group box domain containing                      |
| P51572-2 | BCAP31   | 0.162  | B cell receptor associated protein 31                              |
| O75815-1 | BCAR3    | -0.739 | BCAR3 adaptor protein, NSP family member                           |
| O75934   | BCAS2    | 0.19   | BCAS2 pre-mRNA processing factor                                   |
| Q9NYF8-1 | BCLAF1   | 0.283  | BCL2 associated transcription factor 1                             |
| Q9H694   | BICC1    | -0.491 | BicC family RNA binding protein 1                                  |
| Q9NR09   | BIRC6    | -0.359 | baculoviral IAP repeat containing 6                                |
| Q14692   | BMS1     | -0.248 | BMS1 ribosome biogenesis factor                                    |
| Q7KYR7   | BTN2A1   | 0.406  | butyrophilin subfamily 2 member A1                                 |
| Q8N5I9   | C12orf45 | 0.424  | chromosome 12 open reading frame 45                                |
| Q8N3J3   | C17orf53 | 0.361  | chromosome 17 open reading frame 53                                |
| Q9GZN8-2 | C20orf27 | -0.191 | chromosome 20 open reading frame 27                                |
| Q9BVC5   | C2orf49  | 0.22   | chromosome 2 open reading frame 49                                 |
| P01024   | C3       | -0.342 | complement C3                                                      |
| P0C0L4-1 | C4A/C4B  | -0.431 | complement C4A (Rodgers blood group)                               |
| Q49AR2   | C5orf22  | 0.417  | chromosome 5 open reading frame 22                                 |
| Q9BRJ6   | C7orf50  | -0.442 | chromosome 7 open reading frame 50                                 |
| P40123   | CAP2     | -0.132 | cyclase associated actin cytoskeleton regulatory protein 2         |
| Q5VZK9   | CARMIL1  | -0.329 | capping protein regulator and myosin 1 linker 1                    |
| O14936   | CASK     | -0.213 | calcium/calmodulin dependent serine protein kinase                 |
| P29466   | CASP1    | 0.151  | caspase 1                                                          |
| P42575   | CASP2    | 0.283  | caspase 2                                                          |
| P42574   | CASP3    | 0.221  | caspase 3                                                          |
| P04040   | CAT      | 0.203  | catalase                                                           |
| O95810   | CAVIN2   | 0.278  | caveolae associated protein 2                                      |

|          |          |        |                                                     |
|----------|----------|--------|-----------------------------------------------------|
| P45973   | CBX5     | 0.258  | chromobox 5                                         |
| Q8N163-1 | CCAR2    | 0.145  | cell cycle and apoptosis regulator 2                |
| Q6PK04   | CCDC137  | -0.395 | coiled-coil domain containing 137                   |
| Q7Z3E2   | CCDC186  | 0.233  | coiled-coil domain containing 186                   |
| Q9Y6R9   | CCDC61   | -0.954 | coiled-coil domain containing 61                    |
| Q76M96-2 | CCDC80   | -0.846 | coiled-coil domain containing 80                    |
| O00622   | CCN1     | -0.881 | cellular communication network factor 1             |
| P29279   | CCN2     | -0.658 | cellular communication network factor 2             |
| P20248   | CCNA2    | 0.279  | cyclin A2                                           |
| P24385   | CCND1    | -0.896 | cyclin D1                                           |
| O95273-1 | CCNDBP1  | 0.766  | cyclin D1 binding protein 1                         |
| O60563   | CCNT1    | 0.369  | cyclin T1                                           |
| O14618   | CCS      | 0.245  | copper chaperone for superoxide dismutase           |
| P48643   | CCT5     | 0.148  | chaperonin containing TCP1 subunit 5                |
| P40227   | CCT6A    | 0.163  | chaperonin containing TCP1 subunit 6A               |
| Q6YHK3   | CD109    | -0.188 | CD109 molecule                                      |
| O95400   | CD2BP2   | 0.257  | CD2 cytoplasmic tail binding protein 2              |
| P21926   | CD9      | 0.201  | CD9 molecule                                        |
| Q12834   | CDC20    | -0.196 | cell division cycle 20                              |
| O75419-3 | CDC45    | 0.35   | cell division cycle 45                              |
| O00311   | CDC7     | 0.35   | cell division cycle 7                               |
| Q96FF9   | CDCA5    | 0.806  | cell division cycle associated 5                    |
| P19022   | CDH2     | -0.172 | cadherin 2                                          |
| P06493   | CDK1     | 0.339  | cyclin dependent kinase 1                           |
| Q96SN8   | CDK5RAP2 | -0.41  | CDK5 regulatory subunit associated protein 2        |
| Q00534   | CDK6     | -0.174 | cyclin dependent kinase 6                           |
| Q5VV42   | CDKAL1   | -0.593 | CDK5 regulatory subunit associated protein 1 like 1 |
| P46527   | CDKN1B   | -0.701 | cyclin dependent kinase inhibitor 1B                |
| Q8N726   | CDKN2A   | -0.384 | cyclin dependent kinase inhibitor 2A                |
| Q86X02   | CDR2L    | 0.453  | cerebellar degeneration related protein 2 like      |
| Q02224   | CENPE    | -0.279 | centromere protein E                                |
| Q7Z7K6-3 | CENPV    | 0.235  | centromere protein V                                |
| Q8TEP8-3 | CEP192   | -0.303 | centrosomal protein 192                             |
| Q9Y5P4-3 | CERT1    | -0.241 | ceramide transporter 1                              |
| O00748   | CES2     | 0.416  | carboxylesterase 2                                  |
| P41208   | CETN2    | 0.231  | centrin 2                                           |
| Q13112   | CHAF1B   | 0.38   | chromatin assembly factor 1 subunit B               |
| Q96JM3   | CHAMP1   | 0.251  | chromosome alignment maintaining phosphoprotein 1   |
| Q7LBR1   | CHMP1B   | 0.291  | charged multivesicular body protein 1B              |
| Q9UHD1   | CHORDC1  | 0.249  | cysteine and histidine rich domain containing 1     |
| P0CG13-1 | CHTF8    | 0.34   | chromosome transmission fidelity factor 8           |
| Q9NZ45   | CISD1    | 0.25   | CDGSH iron sulfur domain 1                          |
| O14578-4 | CIT      | -0.172 | citron rho-interacting serine/threonine kinase      |
| Q8WWK9-5 | CKAP2    | 0.727  | cytoskeleton associated protein 2                   |
| Q8IYA6   | CKAP2L   | 0.175  | cytoskeleton associated protein 2 like              |
| Q07065   | CKAP4    | 0.156  | cytoskeleton associated protein 4                   |
| P61024   | CKS1B    | 0.394  | CDC28 protein kinase regulatory subunit 1B          |

|          |        |        |                                                             |
|----------|--------|--------|-------------------------------------------------------------|
| Q7Z460-4 | CLASP1 | -0.22  | cytoplasmic linker associated protein 1                     |
| P49759-3 | CLK1   | 0.309  | CDC like kinase 1                                           |
| Q9H6B4   | CLMP   | -0.457 | CXADR like membrane protein                                 |
| O75503   | CLN5   | 0.174  | CLN5 intracellular trafficking protein                      |
| Q92989   | CLP1   | 0.389  | cleavage and polyadenylation factor I subunit 1             |
| Q9HAW4   | CLSPN  | 0.325  | claspin                                                     |
| O94985-1 | CLSTN1 | -0.381 | calsyntenin 1                                               |
| O75153   | CLUH   | -0.169 | clustered mitochondria homolog                              |
| Q8NFW8   | CMAS   | 0.331  | cytidine monophosphate N-acetylneuraminic acid synthetase   |
| Q96DG6   | CMBL   | 0.41   | carboxymethylenebutenolidase homolog                        |
| Q9BQ75   | CMSS1  | -0.352 | cms1 ribosomal small subunit homolog                        |
| P09543-1 | CNP    | 0.327  | 2',3'-cyclic nucleotide 3' phosphodiesterase                |
| Q9NYJ1-2 | COA4   | -0.199 | cytochrome c oxidase assembly factor 4 homolog              |
| Q96BR5   | COA7   | 0.199  | cytochrome c oxidase assembly factor 7 (putative)           |
| Q9UP83-2 | COG5   | -0.338 | component of oligomeric golgi complex 5                     |
| P38432   | COIL   | 0.339  | coilin                                                      |
| P02452   | COL1A1 | -0.554 | collagen type I alpha 1 chain                               |
| P02462   | COL4A1 | -0.352 | collagen type IV alpha 1 chain                              |
| P08572   | COL4A2 | -0.497 | collagen type IV alpha 2 chain                              |
| Q8NI60-1 | COQ8A  | 0.361  | coenzyme Q8A                                                |
| P13073   | COX4I1 | 0.216  | cytochrome c oxidase subunit 4I1                            |
| P14406   | COX7A2 | 0.298  | cytochrome c oxidase subunit 7A2                            |
| P15954   | COX7C  | 0.214  | cytochrome c oxidase subunit 7C                             |
| O75976   | CPD    | -0.149 | carboxypeptidase D                                          |
| Q99829   | CPNE1  | 0.191  | copine 1                                                    |
| P31327-3 | CPS1   | -0.246 | carbamoyl-phosphate synthase 1                              |
| Q8N684-3 | CPSF7  | 0.161  | cleavage and polyadenylation specific factor 7              |
| P23786   | CPT2   | 0.296  | carnitine palmitoyltransferase 2                            |
| P43155   | CRAT   | 0.211  | carnitine O-acetyltransferase                               |
| O75629   | CREG1  | 0.189  | cellular repressor of E1A stimulated genes 1                |
| Q9NZV1   | CRIM1  | -0.512 | cysteine rich transmembrane BMP regulator 1                 |
| P52943   | CRIP2  | 0.257  | cysteine rich protein 2                                     |
| O75534-4 | CSDE1  | -0.199 | cold shock domain containing E1                             |
| Q16527   | CSRP2  | 0.286  | cysteine and glycine rich protein 2                         |
| Q05048   | CSTF1  | 0.163  | cleavage stimulation factor subunit 1                       |
| O43310-2 | CTIF   | -0.418 | cap binding complex dependent translation initiation factor |
| P35222   | CTNNB1 | -0.215 | catenin beta 1                                              |
| P07339   | CTSD   | 0.269  | cathepsin D                                                 |
| P42830   | CXCL5  | -0.647 | C-X-C motif chemokine ligand 5                              |
| Q9UHQ9   | CYB5R1 | 0.213  | cytochrome b5 reductase 1                                   |
| Q9NV06   | DCAF13 | -0.28  | DDB1 and CUL4 associated factor 13                          |
| Q58WW2   | DCAF6  | -0.653 | DDB1 and CUL4 associated factor 6                           |
| Q96PD2-2 | DCBLD2 | -0.313 | discoidin, CUB and LCCL domain containing 2                 |
| Q7Z4W1   | DCXR   | 0.19   | dicarbonyl and L-xylulose reductase                         |
| Q92466   | DDB2   | 0.489  | damage specific DNA binding protein 2                       |
| Q13206   | DDX10  | -0.262 | DEAD-box helicase 10                                        |
| Q92841   | DDX17  | -0.151 | DEAD-box helicase 17                                        |

|           |         |        |                                                             |
|-----------|---------|--------|-------------------------------------------------------------|
| Q9H8H2    | DDX31   | -0.276 | DEAD-box helicase 31                                        |
| Q9UJV9    | DDX41   | 0.167  | DEAD-box helicase 41                                        |
| Q9Y6V7    | DDX49   | -0.271 | DEAD-box helicase 49                                        |
| P17844    | DDX5    | -0.156 | DEAD-box helicase 5                                         |
| Q9NY93    | DDX56   | -0.522 | DEAD-box helicase 56                                        |
| O43583    | DENR    | 0.321  | density regulated re-initiation and release factor          |
| Q8WYQ5-1  | DGCR8   | 0.336  | DGCR8 microprocessor complex subunit                        |
| Q6UWP2    | DHRS11  | 0.291  | dehydrogenase/reductase 11                                  |
| Q8IY37    | DHX37   | -0.144 | DEAH-box helicase 37                                        |
| Q6P158-1  | DHX57   | -0.233 | DExH-box helicase 57                                        |
| O60879    | DIAPH2  | -0.343 | diaphanous related formin 2                                 |
| Q9NSV4    | DIAPH3  | -0.507 | diaphanous related formin 3                                 |
| Q9UNQ2    | DIMT1   | -0.232 | DIMT1 rRNA methyltransferase and ribosome maturation factor |
| Q9P265    | DIP2B   | -0.268 | disco interacting protein 2 homolog B                       |
| Q8IYB7    | DIS3L2  | -0.256 | DIS3 like 3'-5' exoribonuclease 2                           |
| O94907    | DKK1    | -0.405 | dickkopf WNT signaling pathway inhibitor 1                  |
| P09622    | DLD     | 0.228  | dihydrolipoamide dehydrogenase                              |
| Q86Y56    | DNAAF5  | -0.234 | dynein axonemal assembly factor 5                           |
| P31689    | DNAJA1  | 0.182  | DnaJ heat shock protein family (Hsp40) member A1            |
| P25685    | DNAJB1  | 0.23   | DnaJ heat shock protein family (Hsp40) member B1            |
| Q96KC8    | DNAJC1  | -0.177 | DnaJ heat shock protein family (Hsp40) member C1            |
| Q96DA6    | DNAJC19 | 0.3    | DnaJ heat shock protein family (Hsp40) member C19           |
| Q8WXX5    | DNAJC9  | 0.24   | DnaJ heat shock protein family (Hsp40) member C9            |
| Q6XZF7    | DNMBP   | -0.258 | dynamamin binding protein                                   |
| P26358-1  | DNMT1   | -0.218 | DNA methyltransferase 1                                     |
| Q8N110-3  | DOCK4   | -0.363 | dedicator of cytokinesis 4                                  |
| Q96N67    | DOCK7   | -0.187 | dedicator of cytokinesis 7                                  |
| Q9BZ29-4  | DOCK9   | -0.258 | dedicator of cytokinesis 9                                  |
| Q14919-2  | DRAP1   | 0.212  | DR1 associated protein 1                                    |
| P15924-1  | DSP     | -0.202 | desmoplakin                                                 |
| Q03001-7  | DST     | -0.363 | dystonin                                                    |
| Q9BVJ7    | DUSP23  | -0.155 | dual specificity phosphatase 23                             |
| Q92997    | DVL3    | 0.256  | dishevelled segment polarity protein 3                      |
| O75923-13 | DYSF    | -0.316 | dysferlin                                                   |
| P42892    | ECE1    | -0.175 | endothelin converting enzyme 1                              |
| Q13011    | ECH1    | 0.222  | enoyl-CoA hydratase 1                                       |
| O75521    | ECI2    | 0.229  | enoyl-CoA delta isomerase 2                                 |
| Q9BZQ6    | EDEM3   | -0.217 | ER degradation enhancing alpha-mannosidase like protein 3   |
| P29692-2  | EEF1D   | 0.256  | eukaryotic translation elongation factor 1 delta            |
| O00418    | EEF2K   | -0.577 | eukaryotic elongation factor 2 kinase                       |
| P57772    | EEFSEC  | -0.2   | eukaryotic elongation factor, selenocysteine-tRNA specific  |
| Q12805    | EFEMP1  | -0.478 | EGF containing fibulin extracellular matrix protein 1       |
| P98172    | EFNB1   | 0.271  | ephrin B1                                                   |
| P52799    | EFNB2   | -0.247 | ephrin B2                                                   |
| P00533-1  | EGFR    | -0.531 | epidermal growth factor receptor                            |
| Q8N3D4    | EHBP1L1 | -0.196 | EH domain binding protein 1 like 1                          |
| Q9H9B1    | EHMT1   | -0.328 | euchromatic histone lysine methyltransferase 1              |

|          |         |        |                                                           |
|----------|---------|--------|-----------------------------------------------------------|
| P19525   | EIF2AK2 | 0.163  | eukaryotic translation initiation factor 2 alpha kinase 2 |
| P05198   | EIF2S1  | 0.143  | eukaryotic translation initiation factor 2 subunit alpha  |
| P38919   | EIF4A3  | 0.245  | eukaryotic translation initiation factor 4A3              |
| O43432-3 | EIF4G3  | -0.218 | eukaryotic translation initiation factor 4 gamma 3        |
| P11171-1 | EPB41   | -0.31  | erythrocyte membrane protein band 4.1                     |
| O43491   | EPB41L2 | -0.126 | erythrocyte membrane protein band 4.1 like 2              |
| Q9UM22   | EPDR1   | 0.518  | ependymin related 1                                       |
| Q9HCE0-1 | EPG5    | -0.218 | ectopic P-granules autophagy protein 5 homolog            |
| P29317   | EPHA2   | 0.259  | EPH receptor A2                                           |
| P29323-3 | EPHB2   | -0.397 | EPH receptor B2                                           |
| P07099   | EPHX1   | 0.249  | epoxide hydrolase 1                                       |
| Q8IUD2-1 | ERC1    | -0.372 | ELKS/RAB6-interacting/CAST family member 1                |
| O60447-2 | EVI5    | -0.328 | ecotropic viral integration site 5                        |
| Q96A65   | EXOC4   | -0.383 | exocyst complex component 4                               |
| Q9Y2D4   | EXOC6B  | -0.376 | exocyst complex component 6B                              |
| Q9NQT5   | EXOSC3  | 0.203  | exosome component 3                                       |
| Q06265-2 | EXOSC9  | 0.167  | exosome component 9                                       |
| Q93063-3 | EXT2    | -0.23  | exostosin glycosyltransferase 2                           |
| P00734   | F2      | -0.848 | coagulation factor II, thrombin                           |
| P13726   | F3      | -0.386 | coagulation factor III, tissue factor                     |
| O95864   | FADS2   | -0.314 | fatty acid desaturase 2                                   |
| Q9UNN5   | FAF1    | -0.473 | Fas associated factor 1                                   |
| Q6SJ93   | FAM111B | 0.559  | family with sequence similarity 111 member B              |
| Q9NSI2   | FAM207A | -0.323 | family with sequence similarity 207 member A              |
| Q9H4H8   | FAM83D  | 0.347  | family with sequence similarity 83 member D               |
| Q8WVX9   | FAR1    | -0.287 | fatty acyl-CoA reductase 1                                |
| O95363   | FARS2   | -0.26  | phenylalanyl-tRNA synthetase 2, mitochondrial             |
| P25445   | FAS     | 0.527  | Fas cell surface death receptor                           |
| P49327   | FASN    | -0.17  | fatty acid synthase                                       |
| P23142   | FBLN1   | -0.43  | fibulin 1                                                 |
| P35555   | FBN1    | -0.584 | fibrillin 1                                               |
| Q8N531-1 | FBXL6   | 0.541  | F-box and leucine rich repeat protein 6                   |
| Q8NEZ5   | FBXO22  | 0.199  | F-box protein 22                                          |
| Q9Y324   | FCF1    | -0.292 | FCF1 rRNA-processing protein                              |
| O94868   | FCHSD2  | -0.638 | FCH and double SH3 domains 2                              |
| P37268   | FDFT1   | -0.364 | farnesyl-diphosphate farnesyltransferase 1                |
| P22570-3 | FDXR    | 0.47   | ferredoxin reductase                                      |
| P22830-2 | FECH    | 0.219  | ferrochelatase                                            |
| P39748   | FEN1    | 0.327  | flap structure-specific endonuclease 1                    |
| Q9UHY8-2 | FEZ2    | -0.439 | fasciculation and elongation protein zeta 2               |
| P02679   | FGG     | -0.665 | fibrinogen gamma chain                                    |
| Q2V2M9-4 | FHOD3   | -0.386 | formin homology 2 domain containing 3                     |
| Q4L180   | FILIP1L | 0.63   | filamin A interacting protein 1 like                      |
| Q14254   | FLOT2   | 0.208  | flotillin 2                                               |
| Q96CP2   | FLYWCH2 | 0.236  | FLYWCH family member 2                                    |
| Q96PY5-3 | FMNL2   | -0.642 | formin like 2                                             |
| P02751   | FN1     | -0.763 | fibronectin 1                                             |

|          |         |        |                                                                  |
|----------|---------|--------|------------------------------------------------------------------|
| Q96RU3-1 | FNBP1   | -0.347 | formin binding protein 1                                         |
| Q53EP0   | FNDC3B  | -0.563 | fibronectin type III domain containing 3B                        |
| Q5VW36   | FOCAD   | -0.155 | focadhesin                                                       |
| P85037   | FOXK1   | -0.2   | forkhead box K1                                                  |
| Q9P2Q2   | FRMD4A  | -0.37  | FERM domain containing 4A                                        |
| Q9BZ67   | FRMD8   | 0.262  | FERM domain containing 8                                         |
| Q12841   | FSTL1   | -0.425 | follistatin like 1                                               |
| P02792   | FTL     | 0.467  | ferritin light chain                                             |
| Q9C0B1-1 | FTO     | -0.293 | FTO alpha-ketoglutarate dependent dioxygenase                    |
| P04066   | FUCA1   | 0.319  | alpha-L-fucosidase 1                                             |
| Q9BTY2   | FUCA2   | 0.235  | alpha-L-fucosidase 2                                             |
| Q9BYC5   | FUT8    | -0.217 | fucosyltransferase 8                                             |
| Q9BQS8-4 | FYCO1   | -0.393 | FYVE and coiled-coil domain containing 1                         |
| P10253   | GAA     | 0.226  | glucosidase alpha, acid                                          |
| Q86SR1   | GALNT10 | -0.255 | polypeptide N-acetylgalactosaminyltransferase 10                 |
| Q10471   | GALNT2  | -0.158 | polypeptide N-acetylgalactosaminyltransferase 2                  |
| Q14435   | GALNT3  | -0.211 | polypeptide N-acetylgalactosaminyltransferase 3                  |
| Q86SF2   | GALNT7  | -0.198 | polypeptide N-acetylgalactosaminyltransferase 7                  |
| Q92538   | GBF1    | -0.252 | golgi brefeldin A resistant guanine nucleotide exchange factor 1 |
| Q99988   | GDF15   | 0.73   | growth differentiation factor 15                                 |
| P17302   | GJA1    | -0.278 | gap junction protein alpha 1                                     |
| P32189-3 | GK      | 0.145  | glycerol kinase                                                  |
| P06280   | GLA     | 0.316  | galactosidase alpha                                              |
| Q92896-2 | GLG1    | -0.203 | golgi glycoprotein 1                                             |
| Q04760-1 | GLO1    | 0.231  | glyoxalase I                                                     |
| O76003   | GLRX3   | -0.289 | glutaredoxin 3                                                   |
| P00367   | GLUD1   | 0.155  | glutamate dehydrogenase 1                                        |
| P15104   | GLUL    | 0.415  | glutamate-ammonia ligase                                         |
| P17900   | GM2A    | 0.338  | GM2 ganglioside activator                                        |
| O60547   | GMDS    | -0.275 | GDP-mannose 4,6-dehydratase                                      |
| O75496   | GMNN    | 0.485  | geminin DNA replication inhibitor                                |
| Q14344   | GNA13   | 0.233  | G protein subunit alpha 13                                       |
| P50148   | GNAQ    | -0.253 | G protein subunit alpha q                                        |
| P62879   | GNB2    | 0.206  | G protein subunit beta 2                                         |
| P61952   | GNG11   | 0.725  | G protein subunit gamma 11                                       |
| P63218   | GNG5    | 0.357  | G protein subunit gamma 5                                        |
| Q13823   | GNL2    | -0.157 | G protein nucleolar 2                                            |
| Q9BVP2   | GNL3    | -0.324 | G protein nucleolar 3                                            |
| P15586   | GNS     | 0.172  | glucosamine (N-acetyl)-6-sulfatase                               |
| P35052   | GPC1    | 0.506  | glypican 1                                                       |
| Q9Y625   | GPC6    | -0.686 | glypican 6                                                       |
| Q9NQX3-2 | GPHN    | -0.311 | gephyrin                                                         |
| Q8NFJ5   | GPRC5A  | 0.327  | G protein-coupled receptor class C group 5 member A              |
| Q13322-1 | GRB10   | -0.526 | growth factor receptor bound protein 10                          |
| P62993   | GRB2    | -0.339 | growth factor receptor bound protein 2                           |
| O60565   | GREM1   | -0.526 | gremlin 1, DAN family BMP antagonist                             |
| Q8NEC7-1 | GSTCD   | -0.251 | glutathione S-transferase C-terminal domain containing           |

|          |               |        |                                                                               |
|----------|---------------|--------|-------------------------------------------------------------------------------|
| P28161   | GSTM2         | 0.198  | glutathione S-transferase mu 2                                                |
| P78417   | GSTO1         | 0.194  | glutathione S-transferase omega 1                                             |
| P09211   | GSTP1         | 0.222  | glutathione S-transferase pi 1                                                |
| P13984   | GTF2F2        | -0.285 | general transcription factor IIF subunit 2                                    |
| Q9BZE4   | GTPBP4        | -0.212 | GTP binding protein 4                                                         |
| Q9NYZ3   | GTSE1         | 0.301  | G2 and S-phase expressed 1                                                    |
| P0C0S5   | H2AZ1         | 0.208  | H2A.Z variant histone 1                                                       |
| P40939   | HADHA         | 0.219  | hydroxyacyl-CoA dehydrogenase trifunctional multienzyme complex subunit alpha |
| P55084   | HADHB         | 0.169  | hydroxyacyl-CoA dehydrogenase trifunctional multienzyme complex subunit beta  |
| O14929   | HAT1          | 0.197  | histone acetyltransferase 1                                                   |
| Q00341   | HDLBP         | -0.217 | high density lipoprotein binding protein                                      |
| Q5T447   | HECTD3        | -0.171 | HECT domain E3 ubiquitin protein ligase 3                                     |
| P07686   | HEXB          | 0.217  | hexosaminidase subunit beta                                                   |
| O94992   | HEXIM1        | 0.569  | HEXIM P-TEFb complex subunit 1                                                |
| P04439   | HLA-A         | 0.188  | major histocompatibility complex, class I, A                                  |
| P01889   | HLA-B         | 0.289  | major histocompatibility complex, class I, B                                  |
| P30481   | HLA-B         | 0.331  | major histocompatibility complex, class I, B                                  |
| P20039   | HLA-DRB1      | 0.239  | major histocompatibility complex, class II, DR beta 1                         |
| Q14527   | HLTF          | -0.337 | helicase like transcription factor                                            |
| P09429   | HMGB1         | 0.278  | high mobility group box 1                                                     |
| P35914   | HMGCL         | 0.228  | 3-hydroxy-3-methylglutaryl-CoA lyase                                          |
| P05204   | HMGN2         | 0.302  | high mobility group nucleosomal binding domain 2                              |
| O00479   | HMGN4         | 0.308  | high mobility group nucleosomal binding domain 4                              |
| O75330-3 | HMMR          | 0.215  | hyaluronan mediated motility receptor                                         |
| P09601   | HMOX1         | -0.177 | heme oxygenase 1                                                              |
| Q1KMD3   | HNRNPUL2      | 0.195  | heterogeneous nuclear ribonucleoprotein U like 2                              |
| P0DMV9   | HSPA1A/HSPA1B | 0.236  | heat shock protein family A (Hsp70) member 1A                                 |
| P54652   | HSPA2         | 0.287  | heat shock protein family A (Hsp70) member 2                                  |
| O95757   | HSPA4L        | 0.24   | heat shock protein family A (Hsp70) member 4 like                             |
| P61604   | HSPE1         | 0.351  | heat shock protein family E (Hsp10) member 1                                  |
| P98160   | HSPG2         | -0.419 | heparan sulfate proteoglycan 2                                                |
| Q9BUP3-3 | HTATIP2       | 0.269  | HIV-1 Tat interactive protein 2                                               |
| Q92743   | HTRA1         | -0.527 | HtrA serine peptidase 1                                                       |
| Q7Z6Z7   | HUWE1         | -0.248 | HECT, UBA and WWE domain containing E3 ubiquitin protein ligase 1             |
| P50213   | IDH3A         | 0.148  | isocitrate dehydrogenase (NAD(+)) 3 catalytic subunit alpha                   |
| Q16666-1 | IFI16         | 0.205  | interferon gamma inducible protein 16                                         |
| P80217-2 | IFI35         | 0.23   | interferon induced protein 35                                                 |
| P09914   | IFIT1         | 0.243  | interferon induced protein with tetratricopeptide repeats 1                   |
| P09913   | IFIT2         | 0.446  | interferon induced protein with tetratricopeptide repeats 2                   |
| O14879   | IFIT3         | 0.536  | interferon induced protein with tetratricopeptide repeats 3                   |
| Q9NZI8   | IGF2BP1       | -0.205 | insulin like growth factor 2 mRNA binding protein 1                           |
| Q9Y6M1   | IGF2BP2       | -0.238 | insulin like growth factor 2 mRNA binding protein 2                           |
| P11717   | IGF2R         | -0.278 | insulin like growth factor 2 receptor                                         |
| P40189   | IL6ST         | -0.208 | interleukin 6 signal transducer                                               |
| P29218-3 | IMPA1         | 0.226  | inositol monophosphatase 1                                                    |
| Q9NQS7   | INCENP        | 0.2    | inner centromere protein                                                      |
| Q6DN90   | IQSEC1        | -0.34  | IQ motif and Sec7 domain ArfGEF 1                                             |

|          |           |        |                                                                 |
|----------|-----------|--------|-----------------------------------------------------------------|
| Q9Y616   | IRAK3     | -0.265 | interleukin 1 receptor associated kinase 3                      |
| Q8IU81   | IRF2BP1   | 0.184  | interferon regulatory factor 2 binding protein 1                |
| Q9H1B7   | IRF2BPL   | 0.394  | interferon regulatory factor 2 binding protein like             |
| P35568   | IRS1      | -0.203 | insulin receptor substrate 1                                    |
| Q9BUE6-2 | ISCA1     | 0.297  | iron-sulfur cluster assembly 1                                  |
| Q9H9L3   | ISG20L2   | -0.46  | interferon stimulated exonuclease gene 20 like 2                |
| Q96J02   | ITCH      | -0.24  | itchy E3 ubiquitin protein ligase                               |
| P26006   | ITGA3     | -0.236 | integrin subunit alpha 3                                        |
| P18084   | ITGB5     | -0.186 | integrin subunit beta 5                                         |
| P19827   | ITIH1     | -0.674 | inter-alpha-trypsin inhibitor heavy chain 1                     |
| Q14571   | ITPR2     | -0.325 | inositol 1,4,5-trisphosphate receptor type 2                    |
| Q9Y6Y0   | IVNS1ABP  | -0.252 | influenza virus NS1A binding protein                            |
| P23458   | JAK1      | -0.309 | Janus kinase 1                                                  |
| O95251-1 | KAT7      | 0.278  | lysine acetyltransferase 7                                      |
| Q9Y2K7   | KDM2A     | 0.527  | lysine demethylase 2A                                           |
| Q92945   | KHSRP     | 0.137  | KH-type splicing regulatory protein                             |
| Q5T5P2-1 | KIAA1217  | -0.189 | KIAA1217                                                        |
| Q9BY89-1 | KIAA1671  | -0.559 | KIAA1671                                                        |
| Q9ULH0-1 | KIDINS220 | -0.263 | kinase D interacting substrate 220                              |
| P52732   | KIF11     | 0.32   | kinesin family member 11                                        |
| Q9H1H9   | KIF13A    | -0.299 | kinesin family member 13A                                       |
| Q9NQT8   | KIF13B    | -0.262 | kinesin family member 13B                                       |
| O95235   | KIF20A    | 0.163  | kinesin family member 20A                                       |
| Q14807   | KIF22     | 0.313  | kinesin family member 22                                        |
| Q99661   | KIF2C     | 0.315  | kinesin family member 2C                                        |
| Q96EK5   | KIFBP     | 0.165  | kinesin family binding protein                                  |
| Q9BW19   | KIFC1     | 0.232  | kinesin family member C1                                        |
| Q9NSK0-3 | KLC4      | 0.201  | kinesin light chain 4                                           |
| P50748   | KNTC1     | -0.163 | kinetochore associated 1                                        |
| Q14533   | KRT81     | -0.703 | keratin 81                                                      |
| O15230   | LAMA5     | -0.617 | laminin subunit alpha 5                                         |
| P07942   | LAMB1     | -0.345 | laminin subunit beta 1                                          |
| P11047   | LAMC1     | -0.35  | laminin subunit gamma 1                                         |
| Q13753   | LAMC2     | -0.341 | laminin subunit gamma 2                                         |
| Q6IAA8   | LAMTOR1   | 0.137  | late endosomal/lysosomal adaptor, MAPK and MTOR activator 1     |
| P01130   | LDLR      | -0.526 | low density lipoprotein receptor                                |
| Q99538   | LGMN      | 0.156  | legumain                                                        |
| Q9UPQ0   | LIMCH1    | -0.459 | LIM and calponin homology domains 1                             |
| Q86WA8   | LONP2     | -0.277 | lon peptidase 2, peroxisomal                                    |
| Q9Y4K0   | LOXL2     | -0.585 | lysyl oxidase like 2                                            |
| Q93052   | LPP       | -0.31  | LIM domain containing preferred translocation partner in lipoma |
| P50851-2 | LRBA      | -0.327 | LPS responsive beige-like anchor protein                        |
| Q9Y2L9-3 | LRCH1     | -0.218 | leucine rich repeats and calponin homology domain containing 1  |
| Q96I18-2 | LRCH3     | -0.187 | leucine rich repeats and calponin homology domain containing 3  |
| Q07954   | LRP1      | -0.366 | LDL receptor related protein 1                                  |
| Q6UWE0   | LRSAM1    | -0.249 | leucine rich repeat and sterile alpha motif containing 1        |
| Q3MHD2-2 | LSM12     | 0.164  | LSM12 homolog                                                   |

|          |           |        |                                                                            |
|----------|-----------|--------|----------------------------------------------------------------------------|
| Q9BX40   | LSM14B    | 0.309  | LSM family member 14B                                                      |
| Q14766-4 | LTBP1     | -0.705 | latent transforming growth factor beta binding protein 1                   |
| Q9Y383   | LUC7L2    | 0.247  | LUC7 like 2, pre-mRNA splicing factor                                      |
| O95232   | LUC7L3    | 0.333  | LUC7 like 3 pre-mRNA splicing factor                                       |
| P07948-1 | LYN       | -0.255 | LYN proto-oncogene, Src family tyrosine kinase                             |
| O95372   | LYPLA2    | 0.219  | lysophospholipase 2                                                        |
| Q9UPN3   | MACF1     | -0.307 | microtubule actin crosslinking factor 1                                    |
| O75367   | MACROH2A1 | 0.167  | macroH2A.1 histone                                                         |
| Q9Y6D9   | MAD1L1    | -0.247 | mitotic arrest deficient 1 like 1                                          |
| Q8WXG6-4 | MADD      | 0.172  | MAP kinase activating death domain                                         |
| Q9ULX9   | MAFF      | 0.617  | MAF bZIP transcription factor F                                            |
| P46821   | MAP1B     | -0.172 | microtubule associated protein 1B                                          |
| Q9Y6R4-1 | MAP3K4    | -0.2   | mitogen-activated protein kinase kinase kinase 4                           |
| P27816-1 | MAP4      | -0.207 | microtubule associated protein 4                                           |
| Q8IVH8   | MAP4K3    | -0.232 | mitogen-activated protein kinase kinase kinase kinase 3                    |
| Q16644   | MAPKAPK3  | -0.169 | MAPK activated protein kinase 3                                            |
| P49006   | MARCKSL1  | 0.352  | MARCKS like 1                                                              |
| Q96GX5   | MASTL     | 0.427  | microtubule associated serine/threonine kinase like                        |
| Q9NZL9   | MAT2B     | 0.195  | methionine adenosyltransferase 2B                                          |
| P43121   | MCAM      | 0.175  | melanoma cell adhesion molecule                                            |
| P40926   | MDH2      | 0.249  | malate dehydrogenase 2                                                     |
| Q9NU22   | MDN1      | -0.149 | midasin AAA ATPase 1                                                       |
| Q9H944   | MED20     | 0.237  | mediator complex subunit 20                                                |
| Q7L2J0-1 | MEPCE     | 0.227  | methylphosphate capping enzyme                                             |
| Q86W50-1 | METTL16   | -0.181 | methyltransferase like 16                                                  |
| Q9H8H3   | METTL7A   | 0.168  | methyltransferase like 7A                                                  |
| Q99685   | MGLL      | -0.368 | monoglyceride lipase                                                       |
| Q9BQP7   | MGME1     | 0.479  | mitochondrial genome maintenance exonuclease 1                             |
| O94851-4 | MICAL2    | -0.314 | microtubule associated monooxygenase, calponin and LIM domain containing 2 |
| Q7RTP6   | MICAL3    | -0.277 | microtubule associated monooxygenase, calponin and LIM domain containing 3 |
| Q9BXP6-3 | MICU1     | -0.187 | mitochondrial calcium uptake 1                                             |
| Q99797   | MIPEP     | -0.219 | mitochondrial intermediate peptidase                                       |
| Q9UL63-1 | MKLN1     | -0.217 | muskelin 1                                                                 |
| Q13015   | MLLT11    | 0.238  | MLLT11 transcription factor 7 cofactor                                     |
| P50281   | MMP14     | -0.212 | matrix metalloproteinase 14                                                |
| Q7Z3U7   | MON2      | -0.182 | MON2 homolog, regulator of endosome-to-Golgi trafficking                   |
| Q14149   | MORC3     | 0.165  | MORC family CW-type zinc finger 3                                          |
| O00566   | MPHOSPH10 | 0.152  | M-phase phosphoprotein 10                                                  |
| Q8N3R9-1 | MPP5      | -0.172 | membrane palmitoylated protein 5                                           |
| Q9UBG0   | MRC2      | -0.186 | mannose receptor C type 2                                                  |
| Q9HC36   | MRM3      | 0.213  | mitochondrial rRNA methyltransferase 3                                     |
| Q86TS9   | MRPL52    | 0.197  | mitochondrial ribosomal protein L52                                        |
| P82912   | MRPS11    | 0.198  | mitochondrial ribosomal protein S11                                        |
| O15235   | MRPS12    | 0.275  | mitochondrial ribosomal protein S12                                        |
| P82932   | MRPS6     | 0.165  | mitochondrial ribosomal protein S6                                         |
| Q6UB35-1 | MTHFD1L   | -0.257 | methylenetetrahydrofolate dehydrogenase (NADP+ dependent) 1 like           |
| P42345   | MTOR      | -0.17  | mechanistic target of rapamycin kinase                                     |

|          |           |        |                                                                 |
|----------|-----------|--------|-----------------------------------------------------------------|
| Q9BQG0-2 | MYBBP1A   | -0.266 | MYB binding protein 1a                                          |
| O75592-1 | MYCBP2    | -0.404 | MYC binding protein 2                                           |
| P24844-1 | MYL9      | -0.559 | myosin light chain 9                                            |
| Q12965   | MYO1E     | -0.253 | myosin IE                                                       |
| Q13459   | MYO9B     | -0.25  | myosin IXB                                                      |
| Q9NZM1   | MYOF      | -0.174 | myoferlin                                                       |
| Q9Y2G1   | MYRF      | -0.458 | myelin regulatory factor                                        |
| E9PAV3   | NACA      | -0.187 | nascent polypeptide associated complex subunit alpha            |
| Q8NEY1   | NAV1      | -0.46  | neuron navigator 1                                              |
| A2RRP1   | NBAS      | -0.292 | NBAS subunit of NRZ tethering complex                           |
| Q9UGV2   | NDRG3     | -0.265 | NDRG family member 3                                            |
| O95299   | NDUFA10   | 0.164  | NADH:ubiquinone oxidoreductase subunit A10                      |
| Q16718   | NDUFA5    | 0.154  | NADH:ubiquinone oxidoreductase subunit A5                       |
| P56556   | NDUFA6    | 0.189  | NADH:ubiquinone oxidoreductase subunit A6                       |
| O95182   | NDUFA7    | 0.163  | NADH:ubiquinone oxidoreductase subunit A7                       |
| Q9Y6M9   | NDUFB9    | 0.185  | NADH:ubiquinone oxidoreductase subunit B9                       |
| P49821   | NDUFV1    | 0.138  | NADH:ubiquinone oxidoreductase core subunit V1                  |
| P46934-4 | NEDD4     | -0.241 | NEDD4 E3 ubiquitin protein ligase                               |
| Q96PU5   | NEDD4L    | -0.254 | NEDD4 like E3 ubiquitin protein ligase                          |
| Q8IXH7   | NELFCD    | 0.161  | negative elongation factor complex member C/D                   |
| P18615   | NELFE     | 0.161  | negative elongation factor complex member E                     |
| Q96IV0   | NGLY1     | -0.271 | N-glycanase 1                                                   |
| Q9BZQ8   | NIBAN1    | -0.216 | niban apoptosis regulator 1                                     |
| Q9BYG3   | NIFK      | -0.298 | nucleolar protein interacting with the FHA domain of MKI67      |
| Q9BPW8   | NIPSNAP1  | 0.228  | nipsnap homolog 1                                               |
| Q9UFN0   | NIPSNAP3A | 0.162  | nipsnap homolog 3A                                              |
| Q96D46   | NMD3      | 0.155  | NMD3 ribosome export adaptor                                    |
| P30419   | NMT1      | 0.142  | N-myristoyltransferase 1                                        |
| Q9BVI4   | NOC4L     | -0.191 | nucleolar complex associated 4 homolog                          |
| Q9H6R4-1 | NOL6      | -0.181 | nucleolar protein 6                                             |
| P78316   | NOP14     | -0.182 | NOP14 nucleolar protein                                         |
| Q9Y3C1   | NOP16     | -0.254 | NOP16 nucleolar protein                                         |
| Q9NZM5   | NOP53     | -0.585 | NOP53 ribosome biogenesis factor                                |
| P15559-1 | NQO1      | 0.201  | NAD(P)H quinone dehydrogenase 1                                 |
| P16083   | NQO2      | 0.225  | N-ribosylidihydronicotinamide:quinone reductase 2               |
| O14786-1 | NRP1      | -0.465 | neuropilin 1                                                    |
| O95478   | NSA2      | -0.595 | NSA2 ribosome biogenesis factor                                 |
| Q9UNZ2   | NSFL1C    | 0.157  | NSFL1 cofactor                                                  |
| P49757   | NUMB      | -0.299 | NUMB endocytic adaptor protein                                  |
| Q9BXS6   | NUSAP1    | -0.318 | nucleolar and spindle associated protein 1                      |
| Q9UBU9-1 | NXF1      | 0.291  | nuclear RNA export factor 1                                     |
| P04181   | OAT       | 0.162  | ornithine aminotransferase                                      |
| Q8N543   | OGFOD1    | 0.23   | 2-oxoglutarate and iron dependent oxygenase domain containing 1 |
| Q9NZT2   | OGFR      | 0.167  | opioid growth factor receptor                                   |
| Q9BZF3-5 | OSBPL6    | -0.264 | oxysterol binding protein like 6                                |
| P55809   | OXCT1     | 0.146  | 3-oxoacid CoA-transferase 1                                     |
| Q8N573-1 | OXR1      | -0.282 | oxidation resistance 1                                          |

|          |         |        |                                                          |
|----------|---------|--------|----------------------------------------------------------|
| Q8IVL5   | P3H2    | -0.423 | prolyl 3-hydroxylase 2                                   |
| Q6VY07   | PACS1   | -0.27  | phosphofurin acidic cluster sorting protein 1            |
| Q8N7H5   | PAF1    | 0.233  | PAF1 homolog, Paf1/RNA polymerase II complex component   |
| Q8TEW0   | PARD3   | -0.386 | par-3 family cell polarity regulator                     |
| O95453   | PARN    | -0.303 | poly(A)-specific ribonuclease                            |
| Q9UUK3   | PARP4   | -0.129 | poly(ADP-ribose) polymerase family member 4              |
| Q8IXQ6   | PARP9   | 0.194  | poly(ADP-ribose) polymerase family member 9              |
| Q9HBI1   | PARVB   | -0.278 | parvin beta                                              |
| Q9Y5B6   | PAXBP1  | 0.301  | PAX3 and PAX7 binding protein 1                          |
| Q15004   | PCLAF   | 0.391  | PCNA clamp associated factor                             |
| P12004   | PCNA    | 0.219  | proliferating cell nuclear antigen                       |
| Q14690   | PDCD11  | -0.262 | programmed cell death 11                                 |
| Q53EL6   | PDCD4   | 0.339  | programmed cell death 4                                  |
| Q96HC4   | PDLIM5  | -0.205 | PDZ and LIM domain 5                                     |
| Q9BRX2   | PELO    | 0.188  | pelota mRNA surveillance and ribosome rescue factor      |
| Q9UHV9   | PFDN2   | 0.181  | prefoldin subunit 2                                      |
| Q9NQP4   | PFDN4   | 0.213  | prefoldin subunit 4                                      |
| Q99471   | PFDN5   | 0.22   | prefoldin subunit 5                                      |
| P00558   | PGK1    | 0.154  | phosphoglycerate kinase 1                                |
| P35232   | PHB     | 0.214  | prohibitin                                               |
| Q9BTU6   | PI4K2A  | 0.178  | phosphatidylinositol 4-kinase type 2 alpha               |
| P42356   | PI4KA   | -0.174 | phosphatidylinositol 4-kinase alpha                      |
| O43164   | PJA2    | -0.259 | praja ring finger ubiquitin ligase 2                     |
| Q99640   | PKMYT1  | 0.453  | protein kinase, membrane associated tyrosine/threonine 1 |
| P47712   | PLA2G4A | -0.254 | phospholipase A2 group IVA                               |
| Q13393-1 | PLD1    | -0.259 | phospholipase D1                                         |
| Q9HAU0-6 | PLEKHA5 | -0.222 | pleckstrin homology domain containing A5                 |
| P00747   | PLG     | -0.357 | plasminogen                                              |
| Q99541   | PLIN2   | -0.155 | perilipin 2                                              |
| O75051   | PLXNA2  | -0.459 | plexin A2                                                |
| Q9NRX1   | PNO1    | -0.508 | partner of NOB1 homolog                                  |
| Q9H488   | POFUT1  | 0.146  | protein O-fucosyltransferase 1                           |
| Q8NBL1   | POGLUT1 | 0.138  | protein O-glucosyltransferase 1                          |
| P09884   | POLA1   | -0.275 | DNA polymerase alpha 1, catalytic subunit                |
| P36954   | POLR2I  | -0.358 | RNA polymerase II subunit I                              |
| Q9UNP9   | PPIE    | 0.293  | peptidylprolyl isomerase E                               |
| P30405   | PPIF    | 0.335  | peptidylprolyl isomerase F                               |
| Q96QC0   | PPP1R10 | 0.165  | protein phosphatase 1 regulatory subunit 10              |
| Q12972   | PPP1R8  | 0.276  | protein phosphatase 1 regulatory subunit 8               |
| Q08209   | PPP3CA  | -0.301 | protein phosphatase 3 catalytic subunit alpha            |
| Q9NY27   | PPP4R2  | 0.136  | protein phosphatase 4 regulatory subunit 2               |
| P50897   | PPT1    | 0.267  | palmitoyl-protein thioesterase 1                         |
| O60828   | PQBP1   | 0.242  | polyglutamine binding protein 1                          |
| O43663   | PRC1    | 0.278  | protein regulator of cytokinesis 1                       |
| Q06830   | PRDX1   | 0.24   | peroxiredoxin 1                                          |
| P49642   | PRIM1   | -0.216 | DNA primase subunit 1                                    |
| P49643   | PRIM2   | -0.268 | DNA primase subunit 2                                    |

|                 |          |        |                                                               |
|-----------------|----------|--------|---------------------------------------------------------------|
| <b>Q13131-2</b> | PRKAA1   | 0.206  | protein kinase AMP-activated catalytic subunit alpha 1        |
| <b>Q9Y478</b>   | PRKAB1   | 0.379  | protein kinase AMP-activated non-catalytic subunit beta 1     |
| <b>P17612</b>   | PRKACA   | -0.217 | protein kinase cAMP-activated catalytic subunit alpha         |
| <b>P22694</b>   | PRKACB   | -0.546 | protein kinase cAMP-activated catalytic subunit beta          |
| <b>P10644</b>   | PRKAR1A  | -0.292 | protein kinase cAMP-dependent type I regulatory subunit alpha |
| <b>O15091</b>   | PRORP    | -0.295 | protein only RNase P catalytic subunit                        |
| <b>Q9UMS4</b>   | PRPF19   | 0.194  | pre-mRNA processing factor 19                                 |
| <b>O43172</b>   | PRPF4    | 0.157  | pre-mRNA processing factor 4                                  |
| <b>P25788</b>   | PSMA3    | 0.223  | proteasome subunit alpha 3                                    |
| <b>P25789</b>   | PSMA4    | 0.171  | proteasome subunit alpha 4                                    |
| <b>P28066</b>   | PSMA5    | 0.145  | proteasome subunit alpha 5                                    |
| <b>O14818-1</b> | PSMA7    | 0.152  | proteasome subunit alpha 7                                    |
| <b>P28074-1</b> | PSMB5    | 0.171  | proteasome subunit beta 5                                     |
| <b>Q99436</b>   | PSMB7    | 0.157  | proteasome subunit beta 7                                     |
| <b>P35998</b>   | PSMC2    | 0.217  | proteasome 26S subunit, ATPase 2                              |
| <b>P17980</b>   | PSMC3    | 0.183  | proteasome 26S subunit, ATPase 3                              |
| <b>P43686</b>   | PSMC4    | 0.167  | proteasome 26S subunit, ATPase 4                              |
| <b>P62333</b>   | PSMC6    | 0.233  | proteasome 26S subunit, ATPase 6                              |
| <b>O43242</b>   | PSMD3    | 0.156  | proteasome 26S subunit, non-ATPase 3                          |
| <b>Q9H939-1</b> | PSTPIP2  | 0.223  | proline-serine-threonine phosphatase interacting protein 2    |
| <b>Q15185</b>   | PTGES3   | -0.228 | prostaglandin E synthase 3                                    |
| <b>Q14914</b>   | PTGR1    | 0.271  | prostaglandin reductase 1                                     |
| <b>Q05397-5</b> | PTK2     | -0.324 | protein tyrosine kinase 2                                     |
| <b>Q15678</b>   | PTPN14   | -0.225 | protein tyrosine phosphatase non-receptor type 14             |
| <b>P10586-1</b> | PTPRF    | -0.398 | protein tyrosine phosphatase receptor type F                  |
| <b>Q15262-3</b> | PTPRK    | -0.711 | protein tyrosine phosphatase receptor type K                  |
| <b>Q86Y79</b>   | PTRH1    | -0.185 | peptidyl-tRNA hydrolase 1 homolog                             |
| <b>Q9Y3E5</b>   | PTRH2    | 0.219  | peptidyl-tRNA hydrolase 2                                     |
| <b>Q15397</b>   | PUM3     | -0.455 | pumilio RNA binding family member 3                           |
| <b>Q00577</b>   | PURA     | 0.275  | purine rich element binding protein A                         |
| <b>Q92626</b>   | PXDN     | -0.393 | peroxidasin                                                   |
| <b>Q96PU8</b>   | QKI      | -0.203 | QKI, KH domain containing RNA binding                         |
| <b>P20337</b>   | RAB3B    | -0.164 | RAB3B, member RAS oncogene family                             |
| <b>Q9BUV8-5</b> | RAB5IF   | 0.351  | RAB5 interacting factor                                       |
| <b>P61006</b>   | RAB8A    | 0.201  | RAB8A, member RAS oncogene family                             |
| <b>P51151</b>   | RAB9A    | 0.182  | RAB9A, member RAS oncogene family                             |
| <b>P78406</b>   | RAE1     | 0.194  | ribonucleic acid export 1                                     |
| <b>P62826</b>   | RAN      | 0.15   | RAN, member RAS oncogene family                               |
| <b>P52306-5</b> | RAP1GDS1 | -0.297 | Rap1 GTPase-GDP dissociation stimulator 1                     |
| <b>Q8TEU7-4</b> | RAPGEF6  | -0.363 | Rap guanine nucleotide exchange factor 6                      |
| <b>P20936-1</b> | RASA1    | -0.176 | RAS p21 protein activator 1                                   |
| <b>Q14644</b>   | RASA3    | -0.316 | RAS p21 protein activator 3                                   |
| <b>Q9UJF2-2</b> | RASAL2   | -0.466 | RAS protein activator like 2                                  |
| <b>Q7Z6E9</b>   | RBBP6    | 0.286  | RB binding protein 6, ubiquitin ligase                        |
| <b>Q9Y4C8</b>   | RBM19    | -0.327 | RNA binding motif protein 19                                  |
| <b>P52756</b>   | RBM5     | 0.39   | RNA binding motif protein 5                                   |
| <b>Q9Y388</b>   | RBMX2    | 0.736  | RNA binding motif protein X-linked 2                          |

|          |          |        |                                                                      |
|----------|----------|--------|----------------------------------------------------------------------|
| Q93062-3 | RBPMS    | -0.298 | RNA binding protein, mRNA processing factor                          |
| P18754-2 | RCC1     | 0.156  | regulator of chromosome condensation 1                               |
| P46063   | RECQL    | 0.168  | RecQ like helicase                                                   |
| Q6NUM9-1 | RETSAT   | 0.253  | retinol saturase                                                     |
| P40938   | RFC3     | 0.204  | replication factor C subunit 3                                       |
| P35249   | RFC4     | 0.222  | replication factor C subunit 4                                       |
| P62745   | RHOB     | 0.26   | ras homolog family member B                                          |
| Q8IXI1   | RHOT2    | 0.167  | ras homolog family member T2                                         |
| O14730   | RIOK3    | 0.392  | RIO kinase 3                                                         |
| Q8NC42   | RNF149   | -0.232 | ring finger protein 149                                              |
| Q5VTR2   | RNF20    | 0.25   | ring finger protein 20                                               |
| Q63HN8-4 | RNF213   | -0.191 | ring finger protein 213                                              |
| Q15287-1 | RNPS1    | 0.203  | RNA binding protein with serine rich domain 1                        |
| Q9H9Y2   | RPF1     | -0.487 | ribosome production factor 1 homolog                                 |
| Q9H7B2   | RPF2     | -0.267 | ribosome production factor 2 homolog                                 |
| Q6P5R6   | RPL22L1  | -0.69  | ribosomal protein L22 like 1                                         |
| P62829   | RPL23    | -0.189 | ribosomal protein L23                                                |
| Q6DKI1   | RPL7L1   | -0.382 | ribosomal protein L7 like 1                                          |
| Q5VT52   | RPRD2    | 0.179  | regulation of nuclear pre-mRNA domain containing 2                   |
| Q86WX3   | RPS19BP1 | -0.475 | ribosomal protein S19 binding protein 1                              |
| P62857   | RPS28    | -0.168 | ribosomal protein S28                                                |
| P22090   | RPS4Y1   | -0.325 | ribosomal protein S4 Y-linked 1                                      |
| Q8N122   | RPTOR    | -0.354 | regulatory associated protein of MTOR complex 1                      |
| P55042   | RRAD     | 1.297  | RRAD, Ras related glycolysis inhibitor and calcium channel regulator |
| P31350-2 | RRM2     | 0.61   | ribonucleotide reductase regulatory subunit M2                       |
| Q7LG56-6 | RRM2B    | 0.572  | ribonucleotide reductase regulatory TP53 inducible subunit M2B       |
| Q5JTH9   | RRP12    | -0.172 | ribosomal RNA processing 12 homolog                                  |
| O76021   | RSL1D1   | -0.167 | ribosomal L1 domain containing 1                                     |
| Q7L4I2   | RSRC2    | 0.233  | arginine and serine rich coiled-coil 2                               |
| P0DJ18   | SAA1     | -0.15  | serum amyloid A1                                                     |
| Q9NSI8-1 | SAMSN1   | -0.328 | SAM domain, SH3 domain and nuclear localization signals 1            |
| O00422   | SAP18    | 0.177  | Sin3A associated protein 18                                          |
| Q9UHR5-1 | SAP30BP  | 0.169  | SAP30 binding protein                                                |
| O43819   | SCO2     | 0.229  | SCO cytochrome c oxidase assembly protein 2                          |
| P22307   | SCP2     | 0.178  | sterol carrier protein 2                                             |
| P31040   | SDHA     | 0.222  | succinate dehydrogenase complex flavoprotein subunit A               |
| O60613   | SELENOF  | -0.296 | selenoprotein F                                                      |
| O75326-1 | SEMA7A   | -0.532 | semaphorin 7A (John Milton Hagen blood group)                        |
| P30740   | SERPINB1 | 0.257  | serpin family B member 1                                             |
| P05121   | SERPINE1 | -0.737 | serpin family E member 1                                             |
| P36955   | SERPINF1 | -0.65  | serpin family F member 1                                             |
| Q01105   | SET      | 0.308  | SET nuclear proto-oncogene                                           |
| Q9BYW2   | SETD2    | -0.401 | SET domain containing 2, histone lysine methyltransferase            |
| Q15459   | SF3A1    | 0.197  | splicing factor 3a subunit 1                                         |
| Q15428   | SF3A2    | 0.25   | splicing factor 3a subunit 2                                         |
| Q12874   | SF3A3    | 0.187  | splicing factor 3a subunit 3                                         |
| Q13435   | SF3B2    | 0.163  | splicing factor 3b subunit 2                                         |

|          |         |        |                                                                                      |
|----------|---------|--------|--------------------------------------------------------------------------------------|
| Q9H9B4   | SFXN1   | 0.168  | sideroflexin 1                                                                       |
| Q7Z6J0   | SH3RF1  | -0.662 | SH3 domain containing ring finger 1                                                  |
| Q8NEM2   | SHCBP1  | 0.332  | SHC binding and spindle associated 1                                                 |
| Q9H173   | SIL1    | -0.568 | SIL1 nucleotide exchange factor                                                      |
| O43166-2 | SIPA1L1 | -0.311 | signal induced proliferation associated 1 like 1                                     |
| O60292   | SIPA1L3 | -0.504 | signal induced proliferation associated 1 like 3                                     |
| Q96EB6   | SIRT1   | 0.366  | sirtuin 1                                                                            |
| Q9P270   | SLAIN2  | 0.233  | SLAIN motif family member 2                                                          |
| Q8WUM9   | SLC20A1 | -0.331 | solute carrier family 20 member 1                                                    |
| P05141   | SLC25A5 | 0.227  | solute carrier family 25 member 5                                                    |
| P11169   | SLC2A3  | 0.188  | solute carrier family 2 member 3                                                     |
| Q9Y6M5   | SLC30A1 | 0.255  | solute carrier family 30 member 1                                                    |
| Q96QD8   | SLC38A2 | -0.446 | solute carrier family 38 member 2                                                    |
| Q8WUX1-1 | SLC38A5 | -0.206 | solute carrier family 38 member 5                                                    |
| Q8IWA5-2 | SLC44A2 | 0.301  | solute carrier family 44 member 2                                                    |
| P04920   | SLC4A2  | -0.147 | solute carrier family 4 member 2                                                     |
| Q9Y6M7-7 | SLC4A7  | -0.202 | solute carrier family 4 member 7                                                     |
| P30825   | SLC7A1  | -0.165 | solute carrier family 7 member 1                                                     |
| P52569-3 | SLC7A2  | -0.328 | solute carrier family 7 member 2                                                     |
| Q01650   | SLC7A5  | 0.163  | solute carrier family 7 member 5                                                     |
| Q08AF3-1 | SLFN5   | 0.285  | schlafen family member 5                                                             |
| O95391   | SLU7    | 0.275  | SLU7 homolog, splicing factor                                                        |
| P84022   | SMAD3   | -0.271 | SMAD family member 3                                                                 |
| Q92922   | SMARCC1 | -0.294 | SWI/SNF related, matrix associated, actin dependent regulator of chromatin subfamily |
| Q96Q15-1 | SMG1    | -0.17  | SMG1 nonsense mediated mRNA decay associated PI3K related kinase                     |
| Q8ND04-2 | SMG8    | 0.206  | SMG8 nonsense mediated mRNA decay factor                                             |
| P53814-5 | SMTN    | 0.413  | smoothelin                                                                           |
| Q9HAU4   | SMURF2  | -0.341 | SMAD specific E3 ubiquitin protein ligase 2                                          |
| Q9H7B4   | SMYD3   | -0.534 | SET and MYND domain containing 3                                                     |
| Q7KZF4   | SND1    | -0.257 | staphylococcal nuclease and tudor domain containing 1                                |
| P62308   | SNRPG   | 0.301  | small nuclear ribonucleoprotein polypeptide G                                        |
| Q15036-1 | SNX17   | -0.201 | sorting nexin 17                                                                     |
| Q9UNH7-1 | SNX6    | 0.141  | sorting nexin 6                                                                      |
| P04179   | SOD2    | 0.284  | superoxide dismutase 2                                                               |
| Q99523   | SORT1   | -0.851 | sortilin 1                                                                           |
| Q02447-1 | SP3     | 0.294  | Sp3 transcription factor                                                             |
| Q96R06   | SPAG5   | 0.183  | sperm associated antigen 5                                                           |
| P09486   | SPARC   | -0.202 | secreted protein acidic and cysteine rich                                            |
| Q8NB90-1 | SPATA5  | -0.292 | spermatogenesis associated 5                                                         |
| Q86XZ4   | SPATS2  | -0.279 | spermatogenesis associated serine rich 2                                             |
| Q08AE8   | SPIRE1  | -0.213 | spire type actin nucleation factor 1                                                 |
| P35270   | SPR     | 0.231  | sepiapterin reductase                                                                |
| Q01082-1 | SPTBN1  | -0.168 | spectrin beta, non-erythrocytic 1                                                    |
| Q14534   | SQLE    | -0.194 | squalene epoxidase                                                                   |
| Q8NEF9   | SRFBP1  | -0.182 | serum response factor binding protein 1                                              |
| Q7Z6B7   | SRGAP1  | -0.432 | SLIT-ROBO Rho GTPase activating protein 1                                            |
| O75044   | SRGAP2  | -0.25  | SLIT-ROBO Rho GTPase activating protein 2                                            |

|          |         |        |                                                                       |
|----------|---------|--------|-----------------------------------------------------------------------|
| P30626   | SRI     | 0.196  | sorcin                                                                |
| P49458   | SRP9    | 0.277  | signal recognition particle 9                                         |
| Q9BXP5   | SRRT    | 0.239  | serrate, RNA effector molecule                                        |
| Q05519   | SRSF11  | 0.185  | serine and arginine rich splicing factor 11                           |
| Q08170   | SRSF4   | 0.285  | serine and arginine rich splicing factor 4                            |
| Q13247   | SRSF6   | 0.209  | serine and arginine rich splicing factor 6                            |
| P05455   | SSB     | 0.2    | small RNA binding exonuclease protection factor La                    |
| Q04837   | SSBP1   | 0.277  | single stranded DNA binding protein 1                                 |
| Q9UNL2-2 | SSR3    | 0.192  | signal sequence receptor subunit 3                                    |
| Q8WVM7   | STAG1   | -0.255 | stromal antigen 1                                                     |
| O75886   | STAM2   | -0.212 | signal transducing adaptor molecule 2                                 |
| O76061   | STC2    | -0.764 | stanniocalcin 2                                                       |
| Q13586   | STIM1   | -0.234 | stromal interaction molecule 1                                        |
| Q13188-2 | STK3    | -0.479 | serine/threonine kinase 3                                             |
| P16949-1 | STMN1   | 0.295  | stathmin 1                                                            |
| P27105   | STOM    | 0.316  | stomatin                                                              |
| Q9UNK0   | STX8    | -0.44  | syntaxin 8                                                            |
| O00186   | STXBP3  | 0.208  | syntaxin binding protein 3                                            |
| Q5T5C0-1 | STXBP5  | -0.238 | syntaxin binding protein 5                                            |
| P53999   | SUB1    | 0.411  | SUB1 regulator of transcription                                       |
| P53597   | SUCLG1  | 0.273  | succinate-CoA ligase alpha subunit                                    |
| Q9Y5B9   | SUPT16H | 0.221  | SPT16 homolog, facilitates chromatin remodeling subunit               |
| Q7KZ85   | SUPT6H  | 0.155  | SPT6 homolog, histone chaperone and transcription elongation factor   |
| O94864-1 | SUPT7L  | 0.273  | SPT7 like, STAGA complex gamma subunit                                |
| O75683   | SURF6   | -0.258 | surfeit 6                                                             |
| Q8NF91   | SYNE1   | -0.458 | spectrin repeat containing nuclear envelope protein 1                 |
| Q8WXH0-2 | SYNE2   | -0.313 | spectrin repeat containing nuclear envelope protein 2                 |
| Q8N3V7-2 | SYNPO   | 0.252  | synaptopodin                                                          |
| Q9Y6A5   | TACC3   | 0.267  | transforming acidic coiled-coil containing protein 3                  |
| Q9BSH4   | TACO1   | 0.25   | translational activator of cytochrome c oxidase I                     |
| P09758   | TACSTD2 | 0.259  | tumor associated calcium signal transducer 2                          |
| Q86TJ2   | TADA2B  | 0.314  | transcriptional adaptor 2B                                            |
| Q9C0D5   | TANC1   | -0.315 | tetratricopeptide repeat, ankyrin repeat and coiled-coil containing 1 |
| Q9HCD6-2 | TANC2   | -0.465 | tetratricopeptide repeat, ankyrin repeat and coiled-coil containing 2 |
| Q9H2K8   | TAOK3   | -0.209 | TAO kinase 3                                                          |
| Q03518   | TAP1    | 0.249  | transporter 1, ATP binding cassette subfamily B member                |
| Q03519-1 | TAP2    | 0.245  | transporter 2, ATP binding cassette subfamily B member                |
| Q92609-2 | TBC1D5  | -0.303 | TBC1 domain family member 5                                           |
| O14776   | TCERG1  | 0.13   | transcription elongation regulator 1                                  |
| P17987   | TCP1    | 0.128  | t-complex 1                                                           |
| Q00059   | TFAM    | 0.343  | transcription factor A, mitochondrial                                 |
| Q92734   | TFG     | 0.206  | trafficking from ER to golgi regulator                                |
| P61812-2 | TGFB2   | -0.695 | transforming growth factor beta 2                                     |
| Q15582   | TGFBI   | -0.692 | transforming growth factor beta induced                               |
| P37173-2 | TGFBR2  | -0.762 | transforming growth factor beta receptor 2                            |
| Q6YHU6   | THADA   | -0.321 | THADA armadillo repeat containing                                     |
| P07996   | THBS1   | -0.99  | thrombospondin 1                                                      |

|          |           |        |                                                           |
|----------|-----------|--------|-----------------------------------------------------------|
| Q9NWX6   | THG1L     | 0.287  | tRNA-histidine guanylyltransferase 1 like                 |
| Q9NQ88   | TIGAR     | 0.27   | TP53 induced glycolysis regulatory phosphatase            |
| O43615   | TIMM44    | 0.195  | translocase of inner mitochondrial membrane 44            |
| P16035   | TIMP2     | -0.35  | TIMP metalloproteinase inhibitor 2                        |
| P04183   | TK1       | 0.873  | thymidine kinase 1                                        |
| O60603   | TLR2      | -0.409 | toll like receptor 2                                      |
| Q9UM00   | TMCO1     | 0.179  | transmembrane and coiled-coil domains 1                   |
| Q96MH6   | TMEM68    | -0.984 | transmembrane protein 68                                  |
| P42166   | TMPO      | 0.204  | thymopoietin                                              |
| P24821   | TNC       | -0.587 | tenascin C                                                |
| Q03169   | TNFAIP2   | 0.376  | TNF alpha induced protein 2                               |
| O14763   | TNFRSF10B | 0.205  | TNF receptor superfamily member 10b                       |
| Q9NP84   | TNFRSF12A | -0.436 | TNF receptor superfamily member 12A                       |
| Q15025   | TNIP1     | -0.427 | TNFAIP3 interacting protein 1                             |
| Q9HBL0   | TNS1      | -0.188 | tensin 1                                                  |
| Q68CZ2-1 | TNS3      | -0.226 | tensin 3                                                  |
| Q8IZW8   | TNS4      | -0.315 | tensin 4                                                  |
| P11388-4 | TOP2A     | 0.274  | DNA topoisomerase II alpha                                |
| P04637   | TP53      | 0.179  | tumor protein p53                                         |
| Q53FA7   | TP53I3    | 0.361  | tumor protein p53 inducible protein 3                     |
| O43399-7 | TPD52L2   | 0.148  | TPD52 like 2                                              |
| P60174   | TPI1      | 0.37   | triosephosphate isomerase 1                               |
| P07951   | TPM2      | -0.433 | tropomyosin 2                                             |
| P07951-2 | TPM2      | -0.157 | tropomyosin 2                                             |
| Q9ULW0   | TPX2      | 0.252  | TPX2 microtubule nucleation factor                        |
| O43715   | TRIAP1    | 0.29   | TP53 regulated inhibitor of apoptosis 1                   |
| P19474   | TRIM21    | 0.372  | tripartite motif containing 21                            |
| Q8IYM9-1 | TRIM22    | 0.515  | tripartite motif containing 22                            |
| Q13263   | TRIM28    | 0.294  | tripartite motif containing 28                            |
| Q13049   | TRIM32    | 0.208  | tripartite motif containing 32                            |
| O75962-1 | TRIO      | -0.308 | trio Rho guanine nucleotide exchange factor               |
| Q15650   | TRIP4     | -0.421 | thyroid hormone receptor interactor 4                     |
| Q7L0Y3   | TRMT10C   | 0.215  | tRNA methyltransferase 10C, mitochondrial RNase P subunit |
| Q96Q11   | TRNT1     | 0.178  | tRNA nucleotidyl transferase 1                            |
| Q15631-1 | TSN       | 0.239  | translin                                                  |
| Q16762   | TST       | 0.258  | thiosulfate sulfurtransferase                             |
| Q6P3X3   | TTC27     | -0.268 | tetratricopeptide repeat domain 27                        |
| Q9ULT0-4 | TTC7A     | -0.199 | tetratricopeptide repeat domain 7A                        |
| P68366   | TUBA4A    | 0.202  | tubulin alpha 4a                                          |
| Q13509   | TUBB3     | 0.324  | tubulin beta 3 class III                                  |
| P49411   | TUFM      | 0.151  | Tu translation elongation factor, mitochondrial           |
| P40222   | TXLNA     | 0.194  | taxilin alpha                                             |
| O14530   | TXNDC9    | 0.217  | thioredoxin domain containing 9                           |
| P83876   | TXNL4A    | -0.182 | thioredoxin like 4A                                       |
| Q9NV66   | TYW1      | -0.436 | tRNA-yW synthesizing protein 1 homolog                    |
| Q16763   | UBE2S     | 0.299  | ubiquitin conjugating enzyme E2 S                         |
| Q9NPD8   | UBE2T     | 0.235  | ubiquitin conjugating enzyme E2 T                         |

|          |         |        |                                                               |
|----------|---------|--------|---------------------------------------------------------------|
| O95155-4 | UBE4B   | -0.185 | ubiquitination factor E4B                                     |
| O94874   | UFL1    | 0.155  | UFM1 specific ligase 1                                        |
| Q16739   | UGCG    | -0.32  | UDP-glucose ceramide glucosyltransferase                      |
| Q96T88-2 | UHRF1   | -0.319 | ubiquitin like with PHD and ring finger domains 1             |
| Q96RL1   | UIMC1   | -0.297 | ubiquitin interaction motif containing 1                      |
| Q9UDW1   | UQCR10  | 0.345  | ubiquinol-cytochrome c reductase, complex III subunit X       |
| O94763   | URI1    | -0.218 | URI1 prefoldin like chaperone                                 |
| P51784   | USP11   | 0.168  | ubiquitin specific peptidase 11                               |
| Q8NFA0   | USP32   | -0.255 | ubiquitin specific peptidase 32                               |
| Q9P275-2 | USP36   | -0.197 | ubiquitin specific peptidase 36                               |
| Q93008   | USP9X   | -0.206 | ubiquitin specific peptidase 9 X-linked                       |
| Q9BVJ6-1 | UTP14A  | -0.433 | UTP14A small subunit processome component                     |
| Q9Y5J1   | UTP18   | -0.162 | UTP18 small subunit processome component                      |
| O75691   | UTP20   | -0.307 | UTP20 small subunit processome component                      |
| Q9NQZ2   | UTP3    | 0.215  | UTP3 small subunit processome component                       |
| Q9NYH9   | UTP6    | -0.214 | UTP6 small subunit processome component                       |
| P46939   | UTRN    | -0.376 | utrophin                                                      |
| P52735   | VAV2    | -0.337 | vav guanine nucleotide exchange factor 2                      |
| P19320   | VCAM1   | -0.665 | vascular cell adhesion molecule 1                             |
| P18206   | VCL     | -0.211 | vinculin                                                      |
| P45880-1 | VDAC2   | 0.198  | voltage dependent anion channel 2                             |
| Q9Y277   | VDAC3   | 0.297  | voltage dependent anion channel 3                             |
| Q709C8   | VPS13C  | -0.159 | vacuolar protein sorting 13 homolog C                         |
| O14972   | VPS26C  | -0.157 | VPS26 endosomal protein sorting factor C                      |
| Q8NEZ2   | VPS37A  | 0.297  | VPS37A subunit of ESCRT-I                                     |
| P49754   | VPS41   | -0.238 | VPS41 subunit of HOPS complex                                 |
| Q96AJ9   | VT11A   | -0.433 | vesicle transport through interaction with t-SNAREs 1A        |
| A3KMH1   | VWA8    | -0.146 | von Willebrand factor A domain containing 8                   |
| Q9Y2W2   | WBP11   | 0.29   | WW domain binding protein 11                                  |
| Q969T9   | WBP2    | -0.276 | WW domain binding protein 2                                   |
| O15213   | WDR46   | -0.212 | WD repeat domain 46                                           |
| Q9NW82   | WDR70   | -0.289 | WD repeat domain 70                                           |
| Q6RFH5   | WDR74   | -0.169 | WD repeat domain 74                                           |
| Q6UXN9   | WDR82   | 0.196  | WD repeat domain 82                                           |
| Q5T9L3-2 | WLS     | -0.344 | Wnt ligand secretion mediator                                 |
| Q96S55   | WRNIP1  | 0.153  | WRN helicase interacting protein 1                            |
| O00308   | WWP2    | -0.551 | WW domain containing E3 ubiquitin protein ligase 2            |
| Q01831   | XPC     | 0.515  | XPC complex subunit, DNA damage recognition and repair factor |
| Q9C0E2   | XPO4    | -0.179 | exportin 4                                                    |
| Q96QU8   | XPO6    | -0.236 | exportin 6                                                    |
| Q9Y5A9   | YTHDF2  | -0.242 | YTH N6-methyladenosine RNA binding protein 2                  |
| O96006   | ZBED1   | 0.323  | zinc finger BED-type containing 1                             |
| O75152   | ZC3H11A | 0.204  | zinc finger CCCH-type containing 11A                          |
| Q8IWR0   | ZC3H7A  | -0.132 | zinc finger CCCH-type containing 7A                           |
| Q8TF68-2 | ZNF384  | 0.696  | zinc finger protein 384                                       |
| O43149   | ZZEF1   | -0.257 | zinc finger ZZ-type and EF-hand domain containing 1           |
| P00374   |         | 0.229  |                                                               |

| P84243                                                                                               |         | 0.167          |                                                |
|------------------------------------------------------------------------------------------------------|---------|----------------|------------------------------------------------|
| <b>List of proteins deregulated in THLE2 cells after 24h exposure to AgNP 3.5 ug/mL + CDDP 10 mM</b> |         |                |                                                |
| ID                                                                                                   | Symbol  | Expr Log Ratio | Entrez Gene Name                               |
| Q86V21-1                                                                                             | AACS    | -0.213         | acetoacetyl-CoA synthetase                     |
| Q6PD74                                                                                               | AAGAB   | -0.379         | alpha and gamma adaptin binding protein        |
| Q2M2I8                                                                                               | AAK1    | -0.204         | AP2 associated kinase 1                        |
| Q9Y3I2                                                                                               | AAR2    | 0.229          | AAR2 splicing factor                           |
| Q5JTZ9                                                                                               | AARS2   | 0.178          | alanyl-tRNA synthetase 2, mitochondrial        |
| Q9UDR5                                                                                               | AASS    | 0.186          | aminoadipate-semialdehyde synthase             |
| P33897                                                                                               | ABCD1   | 0.39           | ATP binding cassette subfamily D member 1      |
| Q9NUJ1                                                                                               | ABHD10  | 0.254          | abhydrolase domain containing 10               |
| Q8NFV4                                                                                               | ABHD11  | 0.206          | abhydrolase domain containing 11               |
| O95870                                                                                               | ABHD16A | 0.367          | abhydrolase domain containing 16A              |
| Q12979                                                                                               | ABR     | -0.263         | ABR activator of RhoGEF and GTPase             |
| Q9P1F3                                                                                               | ABRACL  | -0.498         | ABRA C-terminal like                           |
| P09110-1                                                                                             | ACAA1   | 0.181          | acetyl-CoA acyltransferase 1                   |
| P42765                                                                                               | ACAA2   | 0.277          | acetyl-CoA acyltransferase 2                   |
| Q13085-4                                                                                             | ACACA   | -0.31          | acetyl-CoA carboxylase alpha                   |
| Q9H845                                                                                               | ACAD9   | 0.201          | acyl-CoA dehydrogenase family member 9         |
| P11310-2                                                                                             | ACADM   | 0.231          | acyl-CoA dehydrogenase medium chain            |
| P24752                                                                                               | ACAT1   | 0.187          | acetyl-CoA acetyltransferase 1                 |
| Q5T8D3-3                                                                                             | ACBD5   | 0.206          | acyl-CoA binding domain containing 5           |
| Q9BR61                                                                                               | ACBD6   | -0.337         | acyl-CoA binding domain containing 6           |
| E7EQT4                                                                                               | ACIN1   | 0.605          | apoptotic chromatin condensation inducer 1     |
| Q9UKV3-5                                                                                             | ACIN1   | 0.205          | apoptotic chromatin condensation inducer 1     |
| P21399                                                                                               | ACO1    | -0.239         | aconitase 1                                    |
| Q86TX2                                                                                               | ACOT1   | 0.364          | acyl-CoA thioesterase 1                        |
| P11117                                                                                               | ACP2    | 0.187          | acid phosphatase 2, lysosomal                  |
| Q4G176                                                                                               | ACSF3   | 0.254          | acyl-CoA synthetase family member 3            |
| P33121                                                                                               | ACSL1   | 0.21           | acyl-CoA synthetase long chain family member 1 |
| P12814-3                                                                                             | ACTN1   | -0.415         | actinin alpha 1                                |
| O43707                                                                                               | ACTN4   | -0.363         | actinin alpha 4                                |
| P00813                                                                                               | ADA     | 0.289          | adenosine deaminase                            |
| P35611-1                                                                                             | ADD1    | -0.262         | adducin 1                                      |
| Q9UEY8-2                                                                                             | ADD3    | -0.212         | adducin 3                                      |
| P55263                                                                                               | ADK     | -0.164         | adenosine kinase                               |
| Q9H2P0                                                                                               | ADNP    | 0.215          | activity dependent neuroprotector homeobox     |
| Q9BRR6-1                                                                                             | ADPGK   | 0.17           | ADP dependent glucokinase                      |
| Q8N556-2                                                                                             | AFAP1   | -0.213         | actin filament associated protein 1            |
| Q9UHB7-1                                                                                             | AFF4    | 0.235          | AF4/FMR2 family member 4                       |
| Q9Y4W6                                                                                               | AFG3L2  | 0.169          | AFG3 like matrix AAA peptidase subunit 2       |
| Q9NUQ2                                                                                               | AGPAT5  | 0.23           | 1-acylglycerol-3-phosphate O-acyltransferase 5 |
| O00468                                                                                               | AGRN    | -0.267         | agrin                                          |

|                 |                        |        |                                                                              |
|-----------------|------------------------|--------|------------------------------------------------------------------------------|
| <b>O95831-1</b> | AIFM1                  | 0.148  | apoptosis inducing factor mitochondria associated 1                          |
| <b>Q9BRQ8</b>   | AIFM2                  | 0.374  | apoptosis inducing factor mitochondria associated 2                          |
| <b>P54819</b>   | AK2                    | 0.263  | adenylate kinase 2                                                           |
| <b>Q9UIJ7-1</b> | AK3                    | 0.3    | adenylate kinase 3                                                           |
| <b>P27144</b>   | AK4                    | 0.218  | adenylate kinase 4                                                           |
| <b>Q9UKA4</b>   | AKAP11                 | -0.348 | A-kinase anchoring protein 11                                                |
| <b>Q02952-1</b> | AKAP12                 | -0.323 | A-kinase anchoring protein 12                                                |
| <b>Q9ULX6</b>   | AKAP8L                 | 0.267  | A-kinase anchoring protein 8 like                                            |
| <b>Q13740</b>   | ALCAM                  | -0.197 | activated leukocyte cell adhesion molecule                                   |
| <b>P30837</b>   | ALDH1B1                | 0.195  | aldehyde dehydrogenase 1 family member B1                                    |
| <b>P51648-2</b> | ALDH3A2                | 0.197  | aldehyde dehydrogenase 3 family member A2                                    |
| <b>Q9UJX6</b>   | ANAPC2                 | -0.195 | anaphase promoting complex subunit 2                                         |
| <b>Q9BY76</b>   | ANGPTL4                | -0.75  | angiopoietin like 4                                                          |
| <b>Q9P2R3-4</b> | ANKFY1                 | -0.205 | ankyrin repeat and FYVE domain containing 1                                  |
| <b>Q8IWZ3-6</b> | ANKHD1/ANKHD1-EIF4EBP3 | -0.181 | ankyrin repeat and KH domain containing 1                                    |
| <b>Q9NQW6</b>   | ANLN                   | 0.31   | anillin actin binding protein                                                |
| <b>P39687</b>   | ANP32A                 | -0.168 | acidic nuclear phosphoprotein 32 family member A                             |
| <b>Q92688</b>   | ANP32B                 | -0.388 | acidic nuclear phosphoprotein 32 family member B                             |
| <b>P58335-1</b> | ANTXR2                 | -0.57  | ANTXR cell adhesion molecule 2                                               |
| <b>P07355-2</b> | ANXA2                  | -0.387 | annexin A2                                                                   |
| <b>P12429</b>   | ANXA3                  | -0.212 | annexin A3                                                                   |
| <b>P09525</b>   | ANXA4                  | -0.274 | annexin A4                                                                   |
| <b>P08133</b>   | ANXA6                  | -0.205 | annexin A6                                                                   |
| <b>P20073</b>   | ANXA7                  | -0.309 | annexin A7                                                                   |
| <b>P53680</b>   | AP2S1                  | 0.247  | adaptor related protein complex 2 subunit sigma 1                            |
| <b>O14617-5</b> | AP3D1                  | -0.148 | adaptor related protein complex 3 subunit delta 1                            |
| <b>Q92572</b>   | AP3S1                  | -0.179 | adaptor related protein complex 3 subunit sigma 1                            |
| <b>Q7Z5R6</b>   | APBB1IP                | -0.319 | amyloid beta precursor protein binding family B member 1 interacting protein |
| <b>Q06481</b>   | APLP2                  | -0.207 | amyloid beta precursor like protein 2                                        |
| <b>P04114</b>   | APOB                   | -0.458 | apolipoprotein B                                                             |
| <b>Q9NRW3</b>   | APOBEC3C               | 0.352  | apolipoprotein B mRNA editing enzyme catalytic subunit 3C                    |
| <b>P05067</b>   | APP                    | -0.61  | amyloid beta precursor protein                                               |
| <b>O60306</b>   | AQR                    | 0.141  | aquarius intron-binding spliceosomal factor                                  |
| <b>Q96P48-6</b> | ARAP1                  | -0.2   | ArfGAP with RhoGAP domain, ankyrin repeat and PH domain 1                    |
| <b>P15514</b>   | AREG                   | -0.127 | amphiregulin                                                                 |
| <b>Q9NP61</b>   | ARFGAP3                | -0.213 | ADP ribosylation factor GTPase activating protein 3                          |
| <b>Q9Y6D6</b>   | ARFGEF1                | -0.215 | ADP ribosylation factor guanine nucleotide exchange factor 1                 |
| <b>Q8N392</b>   | ARHGAP18               | -0.274 | Rho GTPase activating protein 18                                             |
| <b>Q13017-1</b> | ARHGAP5                | -0.142 | Rho GTPase activating protein 5                                              |
| <b>O15013</b>   | ARHGEF10               | -0.261 | Rho guanine nucleotide exchange factor 10                                    |
| <b>Q9NZN5</b>   | ARHGEF12               | -0.119 | Rho guanine nucleotide exchange factor 12                                    |
| <b>Q8NFD5-3</b> | ARID1B                 | -0.367 | AT-rich interaction domain 1B                                                |
| <b>Q9NVJ2</b>   | ARL8B                  | 0.192  | ADP ribosylation factor like GTPase 8B                                       |
| <b>Q7Z3E5</b>   | ARMC9                  | -0.641 | armadillo repeat containing 9                                                |
| <b>P15289</b>   | ARSA                   | 0.204  | arylsulfatase A                                                              |
| <b>Q9HBK9</b>   | AS3MT                  | -0.588 | arsenite methyltransferase                                                   |
| <b>Q13510-2</b> | ASAH1                  | 0.179  | N-acylsphingosine amidohydrolase 1                                           |

|                 |          |        |                                                                    |
|-----------------|----------|--------|--------------------------------------------------------------------|
| <b>O43150-1</b> | ASAP2    | -0.266 | ArfGAP with SH3 domain, ankyrin repeat and PH domain 2             |
| <b>Q8N9N2</b>   | ASCC1    | -0.567 | activating signal cointegrator 1 complex subunit 1                 |
| <b>Q9H1I8-1</b> | ASCC2    | -0.509 | activating signal cointegrator 1 complex subunit 2                 |
| <b>Q8N3C0</b>   | ASCC3    | -0.534 | activating signal cointegrator 1 complex subunit 3                 |
| <b>Q9NVP2</b>   | ASF1B    | 0.221  | anti-silencing function 1B histone chaperone                       |
| <b>Q8NBU5</b>   | ATAD1    | 0.171  | ATPase family AAA domain containing 1                              |
| <b>Q9NVI7-2</b> | ATAD3A   | 0.222  | ATPase family AAA domain containing 3A                             |
| <b>O95352</b>   | ATG7     | -0.409 | autophagy related 7                                                |
| <b>Q6DD88</b>   | ATL3     | 0.15   | atlastin GTPase 3                                                  |
| <b>P54259</b>   | ATN1     | 0.371  | atrophin 1                                                         |
| <b>O00244</b>   | ATOX1    | 0.201  | antioxidant 1 copper chaperone                                     |
| <b>P05026</b>   | ATP1B1   | 0.213  | ATPase Na <sup>+</sup> /K <sup>+</sup> transporting subunit beta 1 |
| <b>P23634-1</b> | ATP2B4   | -0.198 | ATPase plasma membrane Ca <sup>2+</sup> transporting 4             |
| <b>P06576</b>   | ATP5F1B  | 0.202  | ATP synthase F1 subunit beta                                       |
| <b>P56381</b>   | ATP5F1E  | 0.443  | ATP synthase F1 subunit epsilon                                    |
| <b>Q9UII2</b>   | ATP5IF1  | 0.581  | ATP synthase inhibitory factor subunit 1                           |
| <b>O75947-1</b> | ATP5PD   | 0.218  | ATP synthase peripheral stalk subunit d                            |
| <b>P48047</b>   | ATP5PO   | 0.212  | ATP synthase peripheral stalk subunit OSCP                         |
| <b>Q9UBB4</b>   | ATXN10   | -0.259 | ataxin 10                                                          |
| <b>P0C7T5</b>   | ATXN1L   | 0.403  | ataxin 1 like                                                      |
| <b>Q9Y679-1</b> | AUP1     | 0.234  | AUP1 lipid droplet regulating VLDL assembly factor                 |
| <b>Q96GD4-5</b> | AURKB    | 0.291  | aurora kinase B                                                    |
| <b>Q9NQS1</b>   | AVEN     | -0.285 | apoptosis and caspase activation inhibitor                         |
| <b>P30530</b>   | AXL      | -0.374 | AXL receptor tyrosine kinase                                       |
| <b>P61769</b>   | B2M      | 0.214  | beta-2-microglobulin                                               |
| <b>Q9NXR7-2</b> | BABAM2   | -0.261 | BRISC and BRCA1 A complex member 2                                 |
| <b>O95816</b>   | BAG2     | 0.145  | BCL2 associated athanogene 2                                       |
| <b>O95429</b>   | BAG4     | -0.246 | BCL2 associated athanogene 4                                       |
| <b>Q9UHR4</b>   | BAIAP2L1 | -0.17  | BAR/IMD domain containing adaptor protein 2 like 1                 |
| <b>O75531</b>   | BANF1    | 0.239  | barrier to autointegration factor 1                                |
| <b>Q8WY36</b>   | BBX      | -0.34  | BBX high mobility group box domain containing                      |
| <b>P51572-2</b> | BCAP31   | 0.248  | B cell receptor associated protein 31                              |
| <b>O75815-1</b> | BCAR3    | -0.681 | BCAR3 adaptor protein, NSP family member                           |
| <b>O75934</b>   | BCAS2    | 0.2    | BCAS2 pre-mRNA processing factor                                   |
| <b>O15382</b>   | BCAT2    | 0.176  | branched chain amino acid transaminase 2                           |
| <b>Q9NYF8-1</b> | BCLAF1   | 0.397  | BCL2 associated transcription factor 1                             |
| <b>P11274-1</b> | BCR      | -0.172 | BCR activator of RhoGEF and GTPase                                 |
| <b>Q9H694</b>   | BICC1    | -0.476 | BicC family RNA binding protein 1                                  |
| <b>O15392</b>   | BIRC5    | 0.256  | baculoviral IAP repeat containing 5                                |
| <b>Q9NR09</b>   | BIRC6    | -0.358 | baculoviral IAP repeat containing 6                                |
| <b>Q14692</b>   | BMS1     | -0.165 | BMS1 ribosome biogenesis factor                                    |
| <b>Q8NFC6</b>   | BOD1L1   | 0.162  | bioorientation of chromosomes in cell division 1 like 1            |
| <b>Q12830</b>   | BPTF     | -0.195 | bromodomain PHD finger transcription factor                        |
| <b>P20290</b>   | BTF3     | -0.191 | basic transcription factor 3                                       |
| <b>Q7KYR7</b>   | BTN2A1   | 0.436  | butyrophilin subfamily 2 member A1                                 |
| <b>Q9H0W9</b>   | C11orf54 | -0.259 | chromosome 11 open reading frame 54                                |
| <b>Q9H3H3-3</b> | C11orf68 | -0.411 | chromosome 11 open reading frame 68                                |

|                 |          |        |                                                                                  |
|-----------------|----------|--------|----------------------------------------------------------------------------------|
| <b>Q8N5I9</b>   | C12orf45 | 0.509  | chromosome 12 open reading frame 45                                              |
| <b>Q99622</b>   | C12orf57 | -0.291 | chromosome 12 open reading frame 57                                              |
| <b>Q9UFG5</b>   | C19orf25 | 0.297  | chromosome 19 open reading frame 25                                              |
| <b>Q9BXJ4-3</b> | C1QTNF3  | -0.627 | C1q and TNF related 3                                                            |
| <b>Q9GZN8-2</b> | C20orf27 | -0.301 | chromosome 20 open reading frame 27                                              |
| <b>Q9BVC5</b>   | C2orf49  | 0.256  | chromosome 2 open reading frame 49                                               |
| <b>P01024</b>   | C3       | -0.308 | complement C3                                                                    |
| <b>POC0L4-1</b> | C4A/C4B  | -0.347 | complement C4A (Rodgers blood group)                                             |
| <b>Q49AR2</b>   | C5orf22  | 0.404  | chromosome 5 open reading frame 22                                               |
| <b>Q7Z6I8</b>   | C5orf24  | 0.346  | chromosome 5 open reading frame 24                                               |
| <b>Q9BRJ6</b>   | C7orf50  | -0.444 | chromosome 7 open reading frame 50                                               |
| <b>Q5T6V5</b>   | C9orf64  | -0.243 | chromosome 9 open reading frame 64                                               |
| <b>Q9Y376</b>   | CAB39    | -0.506 | calcium binding protein 39                                                       |
| <b>P27708</b>   | CAD      | -0.199 | carbamoyl-phosphate synthetase 2, aspartate transcarbamylase, and dihydroorotase |
| <b>P27824-2</b> | CANX     | 0.131  | calnexin                                                                         |
| <b>P40123</b>   | CAP2     | -0.213 | cyclase associated actin cytoskeleton regulatory protein 2                       |
| <b>Q14444</b>   | CAPRIN1  | -0.227 | cell cycle associated protein 1                                                  |
| <b>Q9Y2V2</b>   | CARHSP1  | -0.172 | calcium regulated heat stable protein 1                                          |
| <b>Q5VZK9</b>   | CARMIL1  | -0.389 | capping protein regulator and myosin 1 linker 1                                  |
| <b>P49589-3</b> | CARS1    | -0.136 | cysteinyl-tRNA synthetase 1                                                      |
| <b>O14936</b>   | CASK     | -0.185 | calcium/calmodulin dependent serine protein kinase                               |
| <b>P49662</b>   | CASP4    | 0.238  | caspase 4                                                                        |
| <b>P04040</b>   | CAT      | 0.259  | catalase                                                                         |
| <b>Q6NZI2</b>   | CAVIN1   | 0.178  | caveolae associated protein 1                                                    |
| <b>O95810</b>   | CAVIN2   | 0.292  | caveolae associated protein 2                                                    |
| <b>P45973</b>   | CBX5     | 0.347  | chromobox 5                                                                      |
| <b>Q9HC52</b>   | CBX8     | 0.371  | chromobox 8                                                                      |
| <b>Q6P1N0</b>   | CC2D1A   | -0.245 | coiled-coil and C2 domain containing 1A                                          |
| <b>Q8N163-1</b> | CCAR2    | 0.178  | cell cycle and apoptosis regulator 2                                             |
| <b>Q96BQ5</b>   | CCDC127  | 0.395  | coiled-coil domain containing 127                                                |
| <b>Q6PK04</b>   | CCDC137  | -0.32  | coiled-coil domain containing 137                                                |
| <b>Q7Z3E2</b>   | CCDC186  | 0.266  | coiled-coil domain containing 186                                                |
| <b>Q86WR0</b>   | CCDC25   | -0.443 | coiled-coil domain containing 25                                                 |
| <b>Q4VC31</b>   | CCDC58   | 0.309  | coiled-coil domain containing 58                                                 |
| <b>Q9Y6R9</b>   | CCDC61   | -1.012 | coiled-coil domain containing 61                                                 |
| <b>Q76M96-2</b> | CCDC80   | -0.922 | coiled-coil domain containing 80                                                 |
| <b>A6NKD9</b>   | CCDC85C  | -0.343 | coiled-coil domain containing 85C                                                |
| <b>O00622</b>   | CCN1     | -0.999 | cellular communication network factor 1                                          |
| <b>P29279</b>   | CCN2     | -0.588 | cellular communication network factor 2                                          |
| <b>P20248</b>   | CCNA2    | 0.411  | cyclin A2                                                                        |
| <b>P24385</b>   | CCND1    | -0.971 | cyclin D1                                                                        |
| <b>O60563</b>   | CCNT1    | 0.488  | cyclin T1                                                                        |
| <b>Q9ULG6-5</b> | CCPG1    | 0.193  | cell cycle progression 1                                                         |
| <b>O14618</b>   | CCS      | 0.243  | copper chaperone for superoxide dismutase                                        |
| <b>Q6YHK3</b>   | CD109    | -0.278 | CD109 molecule                                                                   |
| <b>P08571</b>   | CD14     | -0.248 | CD14 molecule                                                                    |
| <b>Q9Y5K6</b>   | CD2AP    | -0.243 | CD2 associated protein                                                           |

|                  |          |        |                                                         |
|------------------|----------|--------|---------------------------------------------------------|
| <b>O95400</b>    | CD2BP2   | 0.29   | CD2 cytoplasmic tail binding protein 2                  |
| <b>P16070</b>    | CD44     | 0.206  | CD44 molecule (Indian blood group)                      |
| <b>P08174-7</b>  | CD55     | 0.408  | CD55 molecule (Cromer blood group)                      |
| <b>P13987</b>    | CD59     | 0.334  | CD59 molecule (CD59 blood group)                        |
| <b>P21926</b>    | CD9      | 0.18   | CD9 molecule                                            |
| <b>Q12834</b>    | CDC20    | -0.241 | cell division cycle 20                                  |
| <b>Q9UJX2-1</b>  | CDC23    | 0.288  | cell division cycle 23                                  |
| <b>Q9H3Q1</b>    | CDC42EP4 | 0.254  | CDC42 effector protein 4                                |
| <b>O75419-3</b>  | CDC45    | 0.394  | cell division cycle 45                                  |
| <b>Q99459</b>    | CDC5L    | 0.204  | cell division cycle 5 like                              |
| <b>O00311</b>    | CDC7     | 0.268  | cell division cycle 7                                   |
| <b>Q69YH5-1</b>  | CDCA2    | 0.21   | cell division cycle associated 2                        |
| <b>Q96FF9</b>    | CDCA5    | 0.925  | cell division cycle associated 5                        |
| <b>Q9H5V8</b>    | CDCP1    | -0.131 | CUB domain containing protein 1                         |
| <b>P19022</b>    | CDH2     | -0.203 | cadherin 2                                              |
| <b>P06493</b>    | CDK1     | 0.298  | cyclin dependent kinase 1                               |
| <b>P24941</b>    | CDK2     | 0.188  | cyclin dependent kinase 2                               |
| <b>Q96SN8</b>    | CDK5RAP2 | -0.378 | CDK5 regulatory subunit associated protein 2            |
| <b>Q00534</b>    | CDK6     | -0.226 | cyclin dependent kinase 6                               |
| <b>Q5VV42</b>    | CDKAL1   | -0.652 | CDK5 regulatory subunit associated protein 1 like 1     |
| <b>P42771-1</b>  | CDKN2A   | -0.18  | cyclin dependent kinase inhibitor 2A                    |
| <b>Q8N726</b>    | CDKN2A   | -0.303 | cyclin dependent kinase inhibitor 2A                    |
| <b>Q86X02</b>    | CDR2L    | 0.348  | cerebellar degeneration related protein 2 like          |
| <b>Q03701</b>    | CEBPZ    | 0.184  | CCAAT enhancer binding protein zeta                     |
| <b>Q02224</b>    | CENPE    | -0.264 | centromere protein E                                    |
| <b>Q9H3R5</b>    | CENPH    | 0.328  | centromere protein H                                    |
| <b>Q727K6-3</b>  | CENPV    | 0.321  | centromere protein V                                    |
| <b>Q8TEP8-3</b>  | CEP192   | -0.394 | centrosomal protein 192                                 |
| <b>Q9Y5P4-3</b>  | CERT1    | -0.312 | ceramide transporter 1                                  |
| <b>O00748</b>    | CES2     | 0.448  | carboxylesterase 2                                      |
| <b>P41208</b>    | CETN2    | 0.21   | centrin 2                                               |
| <b>O15182</b>    | CETN3    | -0.384 | centrin 3                                               |
| <b>Q8N884</b>    | CGAS     | 0.368  | cyclic GMP-AMP synthase                                 |
| <b>Q13112</b>    | CHAF1B   | 0.411  | chromatin assembly factor 1 subunit B                   |
| <b>Q96JM3</b>    | CHAMP1   | 0.31   | chromosome alignment maintaining phosphoprotein 1       |
| <b>Q8N4Q1-2</b>  | CHCHD4   | 0.374  | coiled-coil-helix-coiled-coil-helix domain containing 4 |
| <b>Q9HCK8-1</b>  | CHD8     | 0.154  | chromodomain helicase DNA binding protein 8             |
| <b>Q7LBR1</b>    | CHMP1B   | 0.19   | charged multivesicular body protein 1B                  |
| <b>Q9P2E5-1</b>  | CHPF2    | 0.134  | chondroitin polymerizing factor 2                       |
| <b>P0CG13-1</b>  | CHTF8    | 0.288  | chromosome transmission fidelity factor 8               |
| <b>Q9NZ45</b>    | CISD1    | 0.342  | CDGSH iron sulfur domain 1                              |
| <b>Q8N5K1</b>    | CISD2    | 0.276  | CDGSH iron sulfur domain 2                              |
| <b>O14578-4</b>  | CIT      | -0.175 | citron rho-interacting serine/threonine kinase          |
| <b>Q8WWWK9-5</b> | CKAP2    | 0.656  | cytoskeleton associated protein 2                       |
| <b>Q07065</b>    | CKAP4    | 0.253  | cytoskeleton associated protein 4                       |
| <b>P61024</b>    | CKS1B    | 0.314  | CDC28 protein kinase regulatory subunit 1B              |
| <b>Q72460-4</b>  | CLASP1   | -0.238 | cytoplasmic linker associated protein 1                 |

|                 |         |        |                                                               |
|-----------------|---------|--------|---------------------------------------------------------------|
| <b>O75122-3</b> | CLASP2  | -0.145 | cytoplasmic linker associated protein 2                       |
| <b>O14967</b>   | CLGN    | 0.289  | calmegin                                                      |
| <b>Q9Y696</b>   | CLIC4   | -0.276 | chloride intracellular channel 4                              |
| <b>P49759-3</b> | CLK1    | 0.333  | CDC like kinase 1                                             |
| <b>P49761</b>   | CLK3    | 0.285  | CDC like kinase 3                                             |
| <b>Q9H6B4</b>   | CLMP    | -0.416 | CXADR like membrane protein                                   |
| <b>O75503</b>   | CLN5    | 0.3    | CLN5 intracellular trafficking protein                        |
| <b>Q92989</b>   | CLP1    | 0.385  | cleavage and polyadenylation factor I subunit 1               |
| <b>O76031</b>   | CLPX    | 0.191  | caseinolytic mitochondrial matrix peptidase chaperone subunit |
| <b>O94985-1</b> | CLSTN1  | -0.371 | calsyntenin 1                                                 |
| <b>O75153</b>   | CLUH    | -0.239 | clustered mitochondria homolog                                |
| <b>Q8NFW8</b>   | CMAS    | 0.475  | cytidine monophosphate N-acetylneuraminic acid synthetase     |
| <b>Q96DG6</b>   | CMBL    | 0.376  | carboxymethylenebutenolidase homolog                          |
| <b>Q9BQ75</b>   | CMSS1   | -0.293 | cms1 ribosomal small subunit homolog                          |
| <b>Q8N1G2</b>   | CMTR1   | 0.248  | cap methyltransferase 1                                       |
| <b>P62633</b>   | CNBP    | 0.533  | CCHC-type zinc finger nucleic acid binding protein            |
| <b>Q99439</b>   | CNN2    | -0.221 | calponin 2                                                    |
| <b>P09543-1</b> | CNP     | 0.416  | 2',3'-cyclic nucleotide 3' phosphodiesterase                  |
| <b>Q9Y2B0</b>   | CNPY2   | 0.223  | canopy FGF signaling regulator 2                              |
| <b>Q9Y2R0</b>   | COA3    | 0.189  | cytochrome c oxidase assembly factor 3                        |
| <b>Q96BR5</b>   | COA7    | 0.177  | cytochrome c oxidase assembly factor 7 (putative)             |
| <b>Q9UP83-2</b> | COG5    | -0.271 | component of oligomeric golgi complex 5                       |
| <b>P38432</b>   | COIL    | 0.404  | coilin                                                        |
| <b>P02452</b>   | COL1A1  | -0.584 | collagen type I alpha 1 chain                                 |
| <b>P08123</b>   | COL1A2  | -0.666 | collagen type I alpha 2 chain                                 |
| <b>P02462</b>   | COL4A1  | -0.239 | collagen type IV alpha 1 chain                                |
| <b>P08572</b>   | COL4A2  | -0.429 | collagen type IV alpha 2 chain                                |
| <b>Q86VU5</b>   | COMTD1  | 0.176  | catechol-O-methyltransferase domain containing 1              |
| <b>O14579-1</b> | COPE    | -0.328 | coatomer protein complex subunit epsilon                      |
| <b>Q9UBF2</b>   | COPG2   | -0.161 | coatomer protein complex subunit gamma 2                      |
| <b>Q9Y2Z9</b>   | COQ6    | 0.216  | coenzyme Q6, monoxygenase                                     |
| <b>Q8NI60-1</b> | COQ8A   | 0.474  | coenzyme Q8A                                                  |
| <b>O75208</b>   | COQ9    | 0.201  | coenzyme Q9                                                   |
| <b>Q14019</b>   | COTL1   | -0.469 | coactosin like F-actin binding protein 1                      |
| <b>P13073</b>   | COX4I1  | 0.267  | cytochrome c oxidase subunit 4I1                              |
| <b>O14548</b>   | COX7A2L | -0.397 | cytochrome c oxidase subunit 7A2 like                         |
| <b>P15954</b>   | COX7C   | 0.2    | cytochrome c oxidase subunit 7C                               |
| <b>P36551</b>   | CPOX    | 0.223  | coproporphyrinogen oxidase                                    |
| <b>Q9BRF8-1</b> | CPPED1  | -0.441 | calcineurin like phosphoesterase domain containing 1          |
| <b>P31327-3</b> | CPS1    | -0.251 | carbamoyl-phosphate synthase 1                                |
| <b>Q9P2I0</b>   | CPSF2   | 0.161  | cleavage and polyadenylation specific factor 2                |
| <b>Q8N684-3</b> | CPSF7   | 0.174  | cleavage and polyadenylation specific factor 7                |
| <b>P23786</b>   | CPT2    | 0.358  | carnitine palmitoyltransferase 2                              |
| <b>P43155</b>   | CRAT    | 0.233  | carnitine O-acetyltransferase                                 |
| <b>O75629</b>   | CREG1   | 0.326  | cellular repressor of E1A stimulated genes 1                  |
| <b>Q9NZV1</b>   | CRIM1   | -0.459 | cysteine rich transmembrane BMP regulator 1                   |
| <b>P52943</b>   | CRIP2   | 0.272  | cysteine rich protein 2                                       |

|                 |         |        |                                                             |
|-----------------|---------|--------|-------------------------------------------------------------|
| <b>Q9BZJ0</b>   | CRNKL1  | 0.214  | crooked neck pre-mRNA splicing factor 1                     |
| <b>Q9UKG9-3</b> | CROT    | 0.204  | carnitine O-octanoyltransferase                             |
| <b>Q68DQ2</b>   | CRYBG3  | -0.28  | crystallin beta-gamma domain containing 3                   |
| <b>O75390</b>   | CS      | 0.139  | citrate synthase                                            |
| <b>O75534-4</b> | CSDE1   | -0.328 | cold shock domain containing E1                             |
| <b>P68400</b>   | CSNK2A1 | 0.147  | casein kinase 2 alpha 1                                     |
| <b>P19784</b>   | CSNK2A2 | 0.177  | casein kinase 2 alpha 2                                     |
| <b>Q16527</b>   | CSRP2   | 0.251  | cysteine and glycine rich protein 2                         |
| <b>Q05048</b>   | CSTF1   | 0.183  | cleavage stimulation factor subunit 1                       |
| <b>Q9Y5B0</b>   | CTDP1   | -0.194 | CTD phosphatase subunit 1                                   |
| <b>O43310-2</b> | CTIF    | -0.496 | cap binding complex dependent translation initiation factor |
| <b>P35221</b>   | CTNNA1  | -0.208 | catenin alpha 1                                             |
| <b>Q6PD62</b>   | CTR9    | 0.175  | CTR9 homolog, Paf1/RNA polymerase II complex component      |
| <b>P10619</b>   | CTSA    | 0.224  | cathepsin A                                                 |
| <b>P53634</b>   | CTSC    | 0.137  | cathepsin C                                                 |
| <b>P07339</b>   | CTSD    | 0.28   | cathepsin D                                                 |
| <b>P07711</b>   | CTSL    | 0.194  | cathepsin L                                                 |
| <b>P42830</b>   | CXCL5   | -0.695 | C-X-C motif chemokine ligand 5                              |
| <b>Q9UHQ9</b>   | CYB5R1  | 0.293  | cytochrome b5 reductase 1                                   |
| <b>P99999</b>   | CYCS    | 0.262  | cytochrome c, somatic                                       |
| <b>Q96EP5</b>   | DAZAP1  | -0.403 | DAZ associated protein 1                                    |
| <b>P11182</b>   | DBT     | 0.199  | dihydrolipoamide branched chain transacylase E2             |
| <b>Q8TEB1</b>   | DCAF11  | 0.264  | DDB1 and CUL4 associated factor 11                          |
| <b>Q9NV06</b>   | DCAF13  | -0.249 | DDB1 and CUL4 associated factor 13                          |
| <b>Q96PD2-2</b> | DCBLD2  | -0.297 | discoidin, CUB and LCCL domain containing 2                 |
| <b>Q9H773</b>   | DCTPP1  | -0.235 | dCTP pyrophosphatase 1                                      |
| <b>Q7Z4W1</b>   | DCXR    | 0.249  | dicarbonyl and L-xylulose reductase                         |
| <b>Q92466</b>   | DDB2    | 0.49   | damage specific DNA binding protein 2                       |
| <b>Q96HY6</b>   | DDRGK1  | 0.165  | DDRGK domain containing 1                                   |
| <b>P30046</b>   | DDT     | -0.393 | D-dopachrome tautomerase                                    |
| <b>Q92841</b>   | DDX17   | -0.134 | DEAD-box helicase 17                                        |
| <b>Q9NVP1</b>   | DDX18   | 0.149  | DEAD-box helicase 18                                        |
| <b>Q9H8H2</b>   | DDX31   | -0.208 | DEAD-box helicase 31                                        |
| <b>Q9UJV9</b>   | DDX41   | 0.198  | DEAD-box helicase 41                                        |
| <b>Q9Y6V7</b>   | DDX49   | -0.243 | DEAD-box helicase 49                                        |
| <b>Q9Y2R4</b>   | DDX52   | -0.182 | DExD-box helicase 52                                        |
| <b>Q9NY93</b>   | DDX56   | -0.414 | DEAD-box helicase 56                                        |
| <b>Q16698</b>   | DECR1   | 0.201  | 2,4-dienoyl-CoA reductase 1                                 |
| <b>Q9NU11</b>   | DECR2   | 0.192  | 2,4-dienoyl-CoA reductase 2                                 |
| <b>Q8WYQ5-1</b> | DGCR8   | 0.236  | DGCR8 microprocessor complex subunit                        |
| <b>Q6IAN0</b>   | DHRS7B  | 0.22   | dehydrogenase/reductase 7B                                  |
| <b>Q92620</b>   | DHX38   | 0.139  | DEAH-box helicase 38                                        |
| <b>Q6P158-1</b> | DHX57   | -0.245 | DExH-box helicase 57                                        |
| <b>O60879</b>   | DIAPH2  | -0.38  | diaphanous related formin 2                                 |
| <b>Q9NSV4</b>   | DIAPH3  | -0.448 | diaphanous related formin 3                                 |
| <b>Q9BTC0</b>   | DIDO1   | 0.245  | death inducer-obliterator 1                                 |
| <b>Q9P265</b>   | DIP2B   | -0.315 | disco interacting protein 2 homolog B                       |

|                  |         |        |                                                            |
|------------------|---------|--------|------------------------------------------------------------|
| <b>Q8IYB7</b>    | DIS3L2  | -0.248 | DIS3 like 3'-5' exoribonuclease 2                          |
| <b>O60832</b>    | DKC1    | 0.168  | dyskerin pseudouridine synthase 1                          |
| <b>O94907</b>    | DKK1    | -0.299 | dickkopf WNT signaling pathway inhibitor 1                 |
| <b>P10515</b>    | DLAT    | 0.19   | dihydrolipoamide S-acetyltransferase                       |
| <b>P09622</b>    | DLD     | 0.319  | dihydrolipoamide dehydrogenase                             |
| <b>Q9Y2H0</b>    | DLGAP4  | -0.451 | DLG associated protein 4                                   |
| <b>P36957</b>    | DLST    | 0.285  | dihydrolipoamide S-succinyltransferase                     |
| <b>Q9NPF5</b>    | DMAP1   | 0.18   | DNA methyltransferase 1 associated protein 1               |
| <b>Q86Y56</b>    | DNAAF5  | -0.214 | dynein axonemal assembly factor 5                          |
| <b>P25685</b>    | DNAJB1  | 0.28   | DnaJ heat shock protein family (Hsp40) member B1           |
| <b>O75190</b>    | DNAJB6  | -0.283 | DnaJ heat shock protein family (Hsp40) member B6           |
| <b>Q96KC8</b>    | DNAJC1  | -0.113 | DnaJ heat shock protein family (Hsp40) member C1           |
| <b>Q96DA6</b>    | DNAJC19 | 0.384  | DnaJ heat shock protein family (Hsp40) member C19          |
| <b>Q05193</b>    | DNM1    | -0.207 | dynamain 1                                                 |
| <b>Q6XZF7</b>    | DNMBP   | -0.236 | dynamamin binding protein                                  |
| <b>P26358-1</b>  | DNMT1   | -0.194 | DNA methyltransferase 1                                    |
| <b>Q96N67</b>    | DOCK7   | -0.149 | dedicator of cytokinesis 7                                 |
| <b>Q9BZ29-4</b>  | DOCK9   | -0.228 | dedicator of cytokinesis 9                                 |
| <b>Q9NYP3</b>    | DONSON  | 0.302  | downstream neighbor of SON                                 |
| <b>Q86TI2-2</b>  | DPP9    | -0.143 | dipeptidyl peptidase 9                                     |
| <b>Q14919-2</b>  | DRAP1   | 0.166  | DR1 associated protein 1                                   |
| <b>Q14126</b>    | DSG2    | 0.122  | desmoglein 2                                               |
| <b>P15924-1</b>  | DSP     | -0.176 | desmoplakin                                                |
| <b>Q03001-7</b>  | DST     | -0.381 | dystonin                                                   |
| <b>P60981-1</b>  | DSTN    | -0.192 | destrin, actin depolymerizing factor                       |
| <b>Q8TDB6</b>    | DTX3L   | 0.178  | deltex E3 ubiquitin ligase 3L                              |
| <b>Q96G46</b>    | DUS3L   | 0.224  | dihydrouridine synthase 3 like                             |
| <b>Q9BVJ7</b>    | DUSP23  | -0.173 | dual specificity phosphatase 23                            |
| <b>Q92997</b>    | DVL3    | 0.278  | dishevelled segment polarity protein 3                     |
| <b>Q14204</b>    | DYNC1H1 | -0.159 | dynein cytoplasmic 1 heavy chain 1                         |
| <b>Q13409-2</b>  | DYNC1I2 | -0.185 | dynein cytoplasmic 1 intermediate chain 2                  |
| <b>P63172</b>    | DYNLT1  | -0.549 | dynein light chain Tctex-type 1                            |
| <b>O75923-13</b> | DYSF    | -0.237 | dysferlin                                                  |
| <b>Q13011</b>    | ECH1    | 0.304  | enoyl-CoA hydratase 1                                      |
| <b>O75521</b>    | ECI2    | 0.321  | enoyl-CoA delta isomerase 2                                |
| <b>Q9BQ95</b>    | ECSIT   | 0.209  | ECSIT signalling integrator                                |
| <b>Q9H8V3-3</b>  | ECT2    | 0.198  | epithelial cell transforming 2                             |
| <b>Q3B7T1</b>    | EDRF1   | -0.547 | erythroid differentiation regulatory factor 1              |
| <b>Q05639</b>    | EEF1A2  | -0.316 | eukaryotic translation elongation factor 1 alpha 2         |
| <b>P29692-2</b>  | EEF1D   | 0.326  | eukaryotic translation elongation factor 1 delta           |
| <b>O00418</b>    | EEF2K   | -0.432 | eukaryotic elongation factor 2 kinase                      |
| <b>P57772</b>    | EEFSEC  | -0.2   | eukaryotic elongation factor, selenocysteine-tRNA specific |
| <b>Q12805</b>    | EFEMP1  | -0.384 | EGF containing fibulin extracellular matrix protein 1      |
| <b>Q72222</b>    | EFL1    | -0.159 | elongation factor like GTPase 1                            |
| <b>P98172</b>    | EFNB1   | 0.287  | ephrin B1                                                  |
| <b>P52799</b>    | EFNB2   | -0.301 | ephrin B2                                                  |
| <b>P00533-1</b>  | EGFR    | -0.411 | epidermal growth factor receptor                           |

|                 |          |        |                                                             |
|-----------------|----------|--------|-------------------------------------------------------------|
| <b>Q8N3D4</b>   | EHBP1L1  | -0.218 | EH domain binding protein 1 like 1                          |
| <b>Q9H223</b>   | EHD4     | -0.132 | EH domain containing 4                                      |
| <b>Q9H9B1</b>   | EHMT1    | -0.217 | euchromatic histone lysine methyltransferase 1              |
| <b>Q9P2K8-1</b> | EIF2AK4  | -0.199 | eukaryotic translation initiation factor 2 alpha kinase 4   |
| <b>Q9NR50-1</b> | EIF2B3   | -0.169 | eukaryotic translation initiation factor 2B subunit gamma   |
| <b>Q9UBQ5</b>   | EIF3K    | -0.249 | eukaryotic translation initiation factor 3 subunit K        |
| <b>P38919</b>   | EIF4A3   | 0.288  | eukaryotic translation initiation factor 4A3                |
| <b>O43432-3</b> | EIF4G3   | -0.273 | eukaryotic translation initiation factor 4 gamma 3          |
| <b>P55199</b>   | ELL      | 0.319  | elongation factor for RNA polymerase II                     |
| <b>Q14241</b>   | ELOA     | 0.244  | elongin A                                                   |
| <b>Q6IA86-6</b> | ELP2     | -0.187 | elongator acetyltransferase complex subunit 2               |
| <b>Q9H9T3</b>   | ELP3     | -0.286 | elongator acetyltransferase complex subunit 3               |
| <b>Q96EB1-2</b> | ELP4     | -0.377 | elongator acetyltransferase complex subunit 4               |
| <b>Q9P0I2</b>   | EMC3     | 0.145  | ER membrane protein complex subunit 3                       |
| <b>Q8N8S7-2</b> | ENAH     | -0.334 | ENAH actin regulator                                        |
| <b>P17813</b>   | ENG      | -0.598 | endoglin                                                    |
| <b>Q9UM22</b>   | EPDR1    | 0.672  | ependymin related 1                                         |
| <b>Q9HCE0-1</b> | EPG5     | -0.241 | ectopic P-granules autophagy protein 5 homolog              |
| <b>P29317</b>   | EPHA2    | 0.303  | EPH receptor A2                                             |
| <b>P29323-3</b> | EPHB2    | -0.373 | EPH receptor B2                                             |
| <b>P07099</b>   | EPHX1    | 0.333  | epoxide hydrolase 1                                         |
| <b>O95208</b>   | EPN2     | 0.616  | epsin 2                                                     |
| <b>Q8IUD2-1</b> | ERC1     | -0.36  | ELKS/RAB6-interacting/CAST family member 1                  |
| <b>P19447</b>   | ERCC3    | 0.22   | ERCC excision repair 3, TFIIH core complex helicase subunit |
| <b>O43414-1</b> | ERI3     | -0.402 | ERI1 exoribonuclease family member 3                        |
| <b>A0FGR8-2</b> | ESYT2    | 0.155  | extended synaptotagmin 2                                    |
| <b>P62495</b>   | ETF1     | -0.271 | eukaryotic translation termination factor 1                 |
| <b>P13804-1</b> | ETFA     | 0.203  | electron transfer flavoprotein subunit alpha                |
| <b>P38117</b>   | ETFB     | 0.163  | electron transfer flavoprotein subunit beta                 |
| <b>O60447-2</b> | EVI5     | -0.398 | ecotropic viral integration site 5                          |
| <b>Q96A65</b>   | EXOC4    | -0.454 | exocyst complex component 4                                 |
| <b>Q9Y2D4</b>   | EXOC6B   | -0.355 | exocyst complex component 6B                                |
| <b>Q9NQT5</b>   | EXOSC3   | 0.217  | exosome component 3                                         |
| <b>Q5RKV6</b>   | EXOSC6   | 0.237  | exosome component 6                                         |
| <b>Q93063-3</b> | EXT2     | -0.254 | exostosin glycosyltransferase 2                             |
| <b>P13726</b>   | F3       | -0.28  | coagulation factor III, tissue factor                       |
| <b>Q01469</b>   | FABP5    | -0.462 | fatty acid binding protein 5                                |
| <b>O95864</b>   | FADS2    | -0.243 | fatty acid desaturase 2                                     |
| <b>Q9UNN5</b>   | FAF1     | -0.606 | Fas associated factor 1                                     |
| <b>Q6SJ93</b>   | FAM111B  | 0.524  | family with sequence similarity 111 member B                |
| <b>Q8IWE2</b>   | FAM114A1 | -0.173 | family with sequence similarity 114 member A1               |
| <b>Q9NX05-1</b> | FAM120C  | -0.235 | family with sequence similarity 120C                        |
| <b>Q96A26</b>   | FAM162A  | 0.229  | family with sequence similarity 162 member A                |
| <b>Q9NSI2</b>   | FAM207A  | -0.299 | family with sequence similarity 207 member A                |
| <b>O75063</b>   | FAM20B   | 0.151  | FAM20B glycosaminoglycan xylosylkinase                      |
| <b>Q92520</b>   | FAM3C    | 0.193  | family with sequence similarity 3 member C                  |
| <b>Q9H4H8</b>   | FAM83D   | 0.365  | family with sequence similarity 83 member D                 |

|                 |         |        |                                                  |
|-----------------|---------|--------|--------------------------------------------------|
| <b>O95363</b>   | FARS2   | -0.279 | phenylalanyl-tRNA synthetase 2, mitochondrial    |
| <b>P25445</b>   | FAS     | 0.371  | Fas cell surface death receptor                  |
| <b>P49327</b>   | FASN    | -0.237 | fatty acid synthase                              |
| <b>Q7L8L6</b>   | FASTKD5 | 0.223  | FAST kinase domains 5                            |
| <b>P23142</b>   | FBLN1   | -0.414 | fibulin 1                                        |
| <b>P35555</b>   | FBN1    | -0.478 | fibrillin 1                                      |
| <b>Q8N531-1</b> | FBXL6   | 0.619  | F-box and leucine rich repeat protein 6          |
| <b>Q9UKB1</b>   | FBXW11  | -0.15  | F-box and WD repeat domain containing 11         |
| <b>Q0JRZ9-1</b> | FCHO2   | -0.328 | FCH and mu domain containing endocytic adaptor 2 |
| <b>O94868</b>   | FCHSD2  | -0.622 | FCH and double SH3 domains 2                     |
| <b>Q8N0W3-2</b> | FCSK    | -0.177 | fucose kinase                                    |
| <b>P37268</b>   | FDFT1   | -0.318 | farnesyl-diphosphate farnesyltransferase 1       |
| <b>P22570-3</b> | FDXR    | 0.539  | ferredoxin reductase                             |
| <b>P22830-2</b> | FECH    | 0.296  | ferrochelatase                                   |
| <b>P39748</b>   | FEN1    | 0.244  | flap structure-specific endonuclease 1           |
| <b>Q9UHY8-2</b> | FEZ2    | -0.44  | fasciculation and elongation protein zeta 2      |
| <b>P02679</b>   | FGG     | -0.732 | fibrinogen gamma chain                           |
| <b>Q2V2M9-4</b> | FHOD3   | -0.406 | formin homology 2 domain containing 3            |
| <b>Q4L180</b>   | FILIP1L | 0.505  | filamin A interacting protein 1 like             |
| <b>P26885</b>   | FKBP2   | 0.352  | FKBP prolyl isomerase 2                          |
| <b>Q14254</b>   | FLOT2   | 0.258  | flotillin 2                                      |
| <b>Q96CP2</b>   | FLYWCH2 | 0.211  | FLYWCH family member 2                           |
| <b>Q96PY5-3</b> | FMNL2   | -0.531 | formin like 2                                    |
| <b>Q8IVF7</b>   | FMNL3   | -0.266 | formin like 3                                    |
| <b>P02751</b>   | FN1     | -0.919 | fibronectin 1                                    |
| <b>Q96RU3-1</b> | FNBP1   | -0.409 | formin binding protein 1                         |
| <b>Q53EP0</b>   | FNDC3B  | -0.503 | fibronectin type III domain containing 3B        |
| <b>Q5VW36</b>   | FOCAD   | -0.161 | focadhesin                                       |
| <b>P85037</b>   | FOXX1   | -0.256 | forkhead box K1                                  |
| <b>Q9BZ67</b>   | FRMD8   | 0.388  | FERM domain containing 8                         |
| <b>O94915-1</b> | FRYL    | -0.235 | FRY like transcription coactivator               |
| <b>Q12841</b>   | FSTL1   | -0.42  | follistatin like 1                               |
| <b>P02794</b>   | FTH1    | 0.368  | ferritin heavy chain 1                           |
| <b>P02792</b>   | FTL     | 0.604  | ferritin light chain                             |
| <b>Q9C0B1-1</b> | FTO     | -0.411 | FTO alpha-ketoglutarate dependent dioxygenase    |
| <b>Q9UET6</b>   | FTSJ1   | -0.17  | FtsJ RNA 2'-O-methyltransferase 1                |
| <b>Q8IY81</b>   | FTSJ3   | 0.117  | FtsJ RNA 2'-O-methyltransferase 3                |
| <b>P04066</b>   | FUCA1   | 0.304  | alpha-L-fucosidase 1                             |
| <b>Q9BTY2</b>   | FUCA2   | 0.365  | alpha-L-fucosidase 2                             |
| <b>Q13283</b>   | G3BP1   | -0.188 | G3BP stress granule assembly factor 1            |
| <b>Q9UN86</b>   | G3BP2   | -0.212 | G3BP stress granule assembly factor 2            |
| <b>P10253</b>   | GAA     | 0.268  | glucosidase alpha, acid                          |
| <b>O14976</b>   | GAK     | -0.151 | cyclin G associated kinase                       |
| <b>Q86SR1</b>   | GALNT10 | -0.169 | polypeptide N-acetylgalactosaminyltransferase 10 |
| <b>Q14435</b>   | GALNT3  | -0.224 | polypeptide N-acetylgalactosaminyltransferase 3  |
| <b>Q8N4A0</b>   | GALNT4  | 0.168  | polypeptide N-acetylgalactosaminyltransferase 4  |
| <b>Q86SF2</b>   | GALNT7  | -0.131 | polypeptide N-acetylgalactosaminyltransferase 7  |

|                 |         |        |                                                                  |
|-----------------|---------|--------|------------------------------------------------------------------|
| <b>Q9NY12</b>   | GAR1    | 0.331  | GAR1 ribonucleoprotein                                           |
| <b>Q92538</b>   | GBF1    | -0.258 | golgi brefeldin A resistant guanine nucleotide exchange factor 1 |
| <b>Q92947-1</b> | GCDH    | 0.134  | glutaryl-CoA dehydrogenase                                       |
| <b>Q92616</b>   | GCN1    | -0.182 | GCN1 activator of EIF2AK4                                        |
| <b>P23434</b>   | GCSH    | 0.258  | glycine cleavage system protein H                                |
| <b>Q99988</b>   | GDF15   | 0.849  | growth differentiation factor 15                                 |
| <b>O75223</b>   | GGCT    | -0.271 | gamma-glutamylcyclotransferase                                   |
| <b>Q9H3K2</b>   | GHITM   | 0.276  | growth hormone inducible transmembrane protein                   |
| <b>P17302</b>   | GJA1    | -0.251 | gap junction protein alpha 1                                     |
| <b>P32189-3</b> | GK      | 0.201  | glycerol kinase                                                  |
| <b>P06280</b>   | GLA     | 0.396  | galactosidase alpha                                              |
| <b>Q92896-2</b> | GLG1    | -0.136 | golgi glycoprotein 1                                             |
| <b>P35754</b>   | GLRX    | -0.245 | glutaredoxin                                                     |
| <b>O76003</b>   | GLRX3   | -0.447 | glutaredoxin 3                                                   |
| <b>P00367</b>   | GLUD1   | 0.232  | glutamate dehydrogenase 1                                        |
| <b>P15104</b>   | GLUL    | 0.336  | glutamate-ammonia ligase                                         |
| <b>P17900</b>   | GM2A    | 0.357  | GM2 ganglioside activator                                        |
| <b>O60547</b>   | GMDS    | -0.27  | GDP-mannose 4,6-dehydratase                                      |
| <b>P60983</b>   | GMFB    | -0.334 | glia maturation factor beta                                      |
| <b>O75496</b>   | GMNN    | 0.463  | geminin DNA replication inhibitor                                |
| <b>Q14344</b>   | GNA13   | 0.279  | G protein subunit alpha 13                                       |
| <b>P63096-1</b> | GNAI1   | 0.15   | G protein subunit alpha i1                                       |
| <b>P63092-4</b> | GNAS    | 0.186  | GNAS complex locus                                               |
| <b>P62879</b>   | GNB2    | 0.199  | G protein subunit beta 2                                         |
| <b>P61952</b>   | GNG11   | 0.667  | G protein subunit gamma 11                                       |
| <b>P63218</b>   | GNG5    | 0.343  | G protein subunit gamma 5                                        |
| <b>Q9BVP2</b>   | GNL3    | -0.249 | G protein nucleolar 3                                            |
| <b>P15586</b>   | GNS     | 0.295  | glucosamine (N-acetyl)-6-sulfatase                               |
| <b>Q9HD26</b>   | GOPC    | -0.151 | golgi associated PDZ and coiled-coil motif containing            |
| <b>P35052</b>   | GPC1    | 0.443  | glypican 1                                                       |
| <b>Q9Y625</b>   | GPC6    | -0.942 | glypican 6                                                       |
| <b>Q9NQX3-2</b> | GPHN    | -0.38  | gephyrin                                                         |
| <b>Q8NFJ5</b>   | GPRC5A  | 0.295  | G protein-coupled receptor class C group 5 member A              |
| <b>Q96CP6</b>   | GRAMD1A | 0.177  | GRAM domain containing 1A                                        |
| <b>Q13322-1</b> | GRB10   | -0.539 | growth factor receptor bound protein 10                          |
| <b>P62993</b>   | GRB2    | -0.527 | growth factor receptor bound protein 2                           |
| <b>O60565</b>   | GREM1   | -0.5   | gremlin 1, DAN family BMP antagonist                             |
| <b>Q8NEC7-1</b> | GSTCD   | -0.379 | glutathione S-transferase C-terminal domain containing           |
| <b>P30711</b>   | GSTT1   | -0.149 | glutathione S-transferase theta 1                                |
| <b>P13984</b>   | GTF2F2  | -0.415 | general transcription factor IIF subunit 2                       |
| <b>P32780</b>   | GTF2H1  | 0.239  | general transcription factor IIH subunit 1                       |
| <b>A4D1E9</b>   | GTPBP10 | 0.187  | GTP binding protein 10                                           |
| <b>Q9BZE4</b>   | GTPBP4  | -0.161 | GTP binding protein 4                                            |
| <b>Q9NYZ3</b>   | GTSE1   | 0.23   | G2 and S-phase expressed 1                                       |
| <b>Q8N442</b>   | GUF1    | 0.243  | GUF1 homolog, GTPase                                             |
| <b>P46976</b>   | GYG1    | 0.319  | glycogenin 1                                                     |
| <b>P16401</b>   | H1-5    | 0.385  | H1.5 linker histone, cluster member                              |

|                   |          |        |                                                                               |
|-------------------|----------|--------|-------------------------------------------------------------------------------|
| <b>P0C055</b>     | H2AZ1    | 0.234  | H2A.Z variant histone 1                                                       |
| <b>Q16836-2</b>   | HADH     | 0.136  | hydroxyacyl-CoA dehydrogenase                                                 |
| <b>P40939</b>     | HADHA    | 0.318  | hydroxyacyl-CoA dehydrogenase trifunctional multienzyme complex subunit alpha |
| <b>P55084</b>     | HADHB    | 0.263  | hydroxyacyl-CoA dehydrogenase trifunctional multienzyme complex subunit beta  |
| <b>P49590</b>     | HARS2    | 0.161  | histidyl-tRNA synthetase 2, mitochondrial                                     |
| <b>O14929</b>     | HAT1     | 0.165  | histone acetyltransferase 1                                                   |
| <b>P53701</b>     | HCCS     | 0.18   | holocytochrome c synthase                                                     |
| <b>Q8WUI4-5</b>   | HDAC7    | -0.549 | histone deacetylase 7                                                         |
| <b>Q9BXW7</b>     | HDHD5    | 0.112  | haloacid dehalogenase like hydrolase domain containing 5                      |
| <b>Q00341</b>     | HDLBP    | -0.289 | high density lipoprotein binding protein                                      |
| <b>Q6AI08</b>     | HEATR6   | -0.147 | HEAT repeat containing 6                                                      |
| <b>Q9Y5Z4</b>     | HEBP2    | -0.493 | heme binding protein 2                                                        |
| <b>Q5T447</b>     | HECTD3   | -0.185 | HECT domain E3 ubiquitin protein ligase 3                                     |
| <b>P07686</b>     | HEXB     | 0.26   | hexosaminidase subunit beta                                                   |
| <b>O94992</b>     | HEXIM1   | 0.571  | HEXIM P-TEFb complex subunit 1                                                |
| <b>Q9BX68</b>     | HINT2    | 0.203  | histidine triad nucleotide binding protein 2                                  |
| <b>P54198</b>     | HIRA     | -0.242 | histone cell cycle regulator                                                  |
| <b>P04439</b>     | HLA-A    | 0.208  | major histocompatibility complex, class I, A                                  |
| <b>P05534</b>     | HLA-A    | 0.2    | major histocompatibility complex, class I, A                                  |
| <b>P01889</b>     | HLA-B    | 0.336  | major histocompatibility complex, class I, B                                  |
| <b>P30481</b>     | HLA-B    | 0.288  | major histocompatibility complex, class I, B                                  |
| <b>A0A140T9H5</b> | HLA-C    | 0.316  | major histocompatibility complex, class I, C                                  |
| <b>P20036</b>     | HLA-DPA1 | 0.148  | major histocompatibility complex, class II, DP alpha 1                        |
| <b>A0A182DWE9</b> | HLA-DPB1 | 0.246  | major histocompatibility complex, class II, DP beta 1                         |
| <b>P20039</b>     | HLA-DRB1 | 0.331  | major histocompatibility complex, class II, DR beta 1                         |
| <b>Q14527</b>     | HLTF     | -0.311 | helicase like transcription factor                                            |
| <b>P09429</b>     | HMGB1    | 0.182  | high mobility group box 1                                                     |
| <b>P35914</b>     | HMGCL    | 0.252  | 3-hydroxy-3-methylglutaryl-CoA lyase                                          |
| <b>Q01581</b>     | HMGCS1   | -0.249 | 3-hydroxy-3-methylglutaryl-CoA synthase 1                                     |
| <b>P05204</b>     | HMGN2    | 0.236  | high mobility group nucleosomal binding domain 2                              |
| <b>O00479</b>     | HMGN4    | 0.442  | high mobility group nucleosomal binding domain 4                              |
| <b>O75330-3</b>   | HMMR     | 0.205  | hyaluronan mediated motility receptor                                         |
| <b>P09601</b>     | HMOX1    | 0.236  | heme oxygenase 1                                                              |
| <b>P30519</b>     | HMOX2    | 0.171  | heme oxygenase 2                                                              |
| <b>Q13151</b>     | HNRNPA0  | 0.23   | heterogeneous nuclear ribonucleoprotein A0                                    |
| <b>P51991</b>     | HNRNPA3  | -0.256 | heterogeneous nuclear ribonucleoprotein A3                                    |
| <b>O14979-1</b>   | HNRNPDL  | -0.301 | heterogeneous nuclear ribonucleoprotein D like                                |
| <b>P31943</b>     | HNRNPH1  | -0.174 | heterogeneous nuclear ribonucleoprotein H1                                    |
| <b>P52272</b>     | HNRNPM   | 0.156  | heterogeneous nuclear ribonucleoprotein M                                     |
| <b>Q9BUJ2-1</b>   | HNRNPUL1 | 0.126  | heterogeneous nuclear ribonucleoprotein U like 1                              |
| <b>Q1KMD3</b>     | HNRNPUL2 | 0.284  | heterogeneous nuclear ribonucleoprotein U like 2                              |
| <b>Q86VS8</b>     | HOOK3    | -0.343 | hook microtubule tethering protein 3                                          |
| <b>Q5SSJ5</b>     | HP1BP3   | 0.318  | heterochromatin protein 1 binding protein 3                                   |
| <b>P37235</b>     | HPCAL1   | -0.325 | hippocalcin like 1                                                            |
| <b>O75506</b>     | HSBP1    | -0.3   | heat shock factor binding protein 1                                           |
| <b>P28845</b>     | HSD11B1  | 0.556  | hydroxysteroid 11-beta dehydrogenase 1                                        |
| <b>P51659-1</b>   | HSD17B4  | 0.172  | hydroxysteroid 17-beta dehydrogenase 4                                        |

|                 |               |        |                                                                   |
|-----------------|---------------|--------|-------------------------------------------------------------------|
| <b>Q3SXM5</b>   | HSDL1         | 0.265  | hydroxysteroid dehydrogenase like 1                               |
| <b>Q6YN16</b>   | HSDL2         | 0.153  | hydroxysteroid dehydrogenase like 2                               |
| <b>Q0VDF9</b>   | HSPA14        | -0.187 | heat shock protein family A (Hsp70) member 14                     |
| <b>P0DMV9</b>   | HSPA1A/HSPA1B | 0.213  | heat shock protein family A (Hsp70) member 1A                     |
| <b>P54652</b>   | HSPA2         | 0.237  | heat shock protein family A (Hsp70) member 2                      |
| <b>O95757</b>   | HSPA4L        | 0.204  | heat shock protein family A (Hsp70) member 4 like                 |
| <b>P38646</b>   | HSPA9         | 0.184  | heat shock protein family A (Hsp70) member 9                      |
| <b>Q9Y547</b>   | HSPB11        | -0.71  | heat shock protein family B (small) member 11                     |
| <b>Q9UJY1</b>   | HSPB8         | 0.377  | heat shock protein family B (small) member 8                      |
| <b>P10809</b>   | HSPD1         | 0.21   | heat shock protein family D (Hsp60) member 1                      |
| <b>P61604</b>   | HSPE1         | 0.552  | heat shock protein family E (Hsp10) member 1                      |
| <b>P98160</b>   | HSPG2         | -0.461 | heparan sulfate proteoglycan 2                                    |
| <b>Q9BUP3-3</b> | HTATIP2       | 0.399  | HIV-1 Tat interactive protein 2                                   |
| <b>Q92743</b>   | HTRA1         | -0.554 | HtrA serine peptidase 1                                           |
| <b>Q726Z7</b>   | HUWE1         | -0.288 | HECT, UBA and WWE domain containing E3 ubiquitin protein ligase 1 |
| <b>Q9NSE4</b>   | IARS2         | 0.165  | isoleucyl-tRNA synthetase 2, mitochondrial                        |
| <b>P05362</b>   | ICAM1         | 0.144  | intercellular adhesion molecule 1                                 |
| <b>P48735</b>   | IDH2          | 0.184  | isocitrate dehydrogenase (NADP(+)) 2                              |
| <b>P50213</b>   | IDH3A         | 0.195  | isocitrate dehydrogenase (NAD(+)) 3 catalytic subunit alpha       |
| <b>O43837</b>   | IDH3B         | 0.246  | isocitrate dehydrogenase (NAD(+)) 3 non-catalytic subunit beta    |
| <b>Q16666-1</b> | IFI16         | 0.232  | interferon gamma inducible protein 16                             |
| <b>P80217-2</b> | IFI35         | 0.195  | interferon induced protein 35                                     |
| <b>P09914</b>   | IFIT1         | 0.175  | interferon induced protein with tetratricopeptide repeats 1       |
| <b>P09913</b>   | IFIT2         | 0.318  | interferon induced protein with tetratricopeptide repeats 2       |
| <b>O14879</b>   | IFIT3         | 0.382  | interferon induced protein with tetratricopeptide repeats 3       |
| <b>Q9NZI8</b>   | IGF2BP1       | -0.266 | insulin like growth factor 2 mRNA binding protein 1               |
| <b>Q9Y6M1</b>   | IGF2BP2       | -0.285 | insulin like growth factor 2 mRNA binding protein 2               |
| <b>O00425</b>   | IGF2BP3       | -0.256 | insulin like growth factor 2 mRNA binding protein 3               |
| <b>P11717</b>   | IGF2R         | -0.245 | insulin like growth factor 2 receptor                             |
| <b>Q13123</b>   | IK            | 0.174  | IK cytokine                                                       |
| <b>Q70UQ0-4</b> | IKBIP         | 0.148  | IKBKB interacting protein                                         |
| <b>P01584</b>   | IL1B          | 0.31   | interleukin 1 beta                                                |
| <b>Q9NQS7</b>   | INCENP        | 0.358  | inner centromere protein                                          |
| <b>O15327</b>   | INPP4B        | -0.541 | inositol polyphosphate-4-phosphatase type II B                    |
| <b>Q9Y2H2-1</b> | INPP5F        | -0.224 | inositol polyphosphate-5-phosphatase F                            |
| <b>Q8TEX9-2</b> | IPO4          | -0.208 | importin 4                                                        |
| <b>O95373</b>   | IPO7          | -0.265 | importin 7                                                        |
| <b>Q5JU85-2</b> | IQSEC2        | -0.164 | IQ motif and Sec7 domain ArfGEF 2                                 |
| <b>Q9Y616</b>   | IRAK3         | -0.42  | interleukin 1 receptor associated kinase 3                        |
| <b>Q9H1B7</b>   | IRF2BPL       | 0.306  | interferon regulatory factor 2 binding protein like               |
| <b>P35568</b>   | IRS1          | -0.186 | insulin receptor substrate 1                                      |
| <b>Q9BUE6-2</b> | ISCA1         | 0.354  | iron-sulfur cluster assembly 1                                    |
| <b>Q96J02</b>   | ITCH          | -0.306 | itchy E3 ubiquitin protein ligase                                 |
| <b>P26006</b>   | ITGA3         | -0.209 | integrin subunit alpha 3                                          |
| <b>P19827</b>   | ITIH1         | -0.703 | inter-alpha-trypsin inhibitor heavy chain 1                       |
| <b>Q14624-1</b> | ITIH4         | -0.751 | inter-alpha-trypsin inhibitor heavy chain 4                       |
| <b>Q14571</b>   | ITPR2         | -0.26  | inositol 1,4,5-trisphosphate receptor type 2                      |

|                 |          |        |                                                               |
|-----------------|----------|--------|---------------------------------------------------------------|
| <b>Q8IWB1</b>   | ITPRIP   | 0.253  | inositol 1,4,5-trisphosphate receptor interacting protein     |
| <b>Q15811</b>   | ITSN1    | -0.384 | intersectin 1                                                 |
| <b>P26440</b>   | IVD      | 0.153  | isovaleryl-CoA dehydrogenase                                  |
| <b>Q9Y6Y0</b>   | IVNS1ABP | -0.306 | influenza virus NS1A binding protein                          |
| <b>P23458</b>   | JAK1     | -0.214 | Janus kinase 1                                                |
| <b>Q9UK76-2</b> | JPT1     | -0.441 | Jupiter microtubule associated homolog 1                      |
| <b>P17275</b>   | JUNB     | 0.276  | JunB proto-oncogene, AP-1 transcription factor subunit        |
| <b>O95251-1</b> | KAT7     | 0.419  | lysine acetyltransferase 7                                    |
| <b>Q9P0J7</b>   | KCMF1    | -0.215 | potassium channel modulatory factor 1                         |
| <b>Q9Y2K7</b>   | KDM2A    | 0.634  | lysine demethylase 2A                                         |
| <b>O15037</b>   | KHNYN    | 0.244  | KH and NYN domain containing                                  |
| <b>Q92945</b>   | KHSRP    | 0.145  | KH-type splicing regulatory protein                           |
| <b>Q9BY89-1</b> | KIAA1671 | -0.499 | KIAA1671                                                      |
| <b>P52732</b>   | KIF11    | 0.227  | kinesin family member 11                                      |
| <b>Q9H1H9</b>   | KIF13A   | -0.283 | kinesin family member 13A                                     |
| <b>Q9NQT8</b>   | KIF13B   | -0.236 | kinesin family member 13B                                     |
| <b>Q14807</b>   | KIF22    | 0.398  | kinesin family member 22                                      |
| <b>Q99661</b>   | KIF2C    | 0.269  | kinesin family member 2C                                      |
| <b>Q9BW19</b>   | KIFC1    | 0.248  | kinesin family member C1                                      |
| <b>Q8TBB5</b>   | KLHDC4   | -0.43  | kelch domain containing 4                                     |
| <b>Q03164-3</b> | KMT2A    | 0.182  | lysine methyltransferase 2A                                   |
| <b>Q8NG31-1</b> | KNL1     | 0.185  | kinetochore scaffold 1                                        |
| <b>Q1ED39</b>   | KNOP1    | 0.3    | lysine rich nucleolar protein 1                               |
| <b>P50748</b>   | KNTC1    | -0.248 | kinetochore associated 1                                      |
| <b>P52294</b>   | KPNA1    | -0.241 | karyopherin subunit alpha 1                                   |
| <b>O00505</b>   | KPNA3    | -0.373 | karyopherin subunit alpha 3                                   |
| <b>O00629</b>   | KPNA4    | -0.314 | karyopherin subunit alpha 4                                   |
| <b>O60684</b>   | KPNA6    | -0.244 | karyopherin subunit alpha 6                                   |
| <b>Q14974</b>   | KPNB1    | -0.26  | karyopherin subunit beta 1                                    |
| <b>Q8N9T8</b>   | KRI1     | 0.183  | KRI1 homolog                                                  |
| <b>Q14533</b>   | KRT81    | -0.766 | keratin 81                                                    |
| <b>Q9BQD3</b>   | KXD1     | -0.204 | KxDL motif containing 1                                       |
| <b>Q9H9P8-1</b> | L2HGDH   | 0.2    | L-2-hydroxyglutarate dehydrogenase                            |
| <b>Q96EM0</b>   | L3HYPDH  | -0.199 | trans-L-3-hydroxyproline dehydratase                          |
| <b>O15230</b>   | LAMA5    | -0.378 | laminin subunit alpha 5                                       |
| <b>P07942</b>   | LAMB1    | -0.278 | laminin subunit beta 1                                        |
| <b>P11047</b>   | LAMC1    | -0.319 | laminin subunit gamma 1                                       |
| <b>Q13753</b>   | LAMC2    | -0.271 | laminin subunit gamma 2                                       |
| <b>Q6IAA8</b>   | LAMTOR1  | 0.191  | late endosomal/lysosomal adaptor, MAPK and MTOR activator 1   |
| <b>P28838-2</b> | LAP3     | 0.139  | leucine aminopeptidase 3                                      |
| <b>Q659C4</b>   | LARP1B   | -0.351 | La ribonucleoprotein domain family member 1B                  |
| <b>P01130</b>   | LDLR     | -0.436 | low density lipoprotein receptor                              |
| <b>Q8NC56-1</b> | LEMD2    | 0.316  | LEM domain containing 2                                       |
| <b>Q8WVC0</b>   | LEO1     | 0.217  | LEO1 homolog, Paf1/RNA polymerase II complex component        |
| <b>O95202</b>   | LETM1    | 0.14   | leucine zipper and EF-hand containing transmembrane protein 1 |
| <b>Q08380</b>   | LGALS3BP | 0.154  | galectin 3 binding protein                                    |
| <b>Q99538</b>   | LGMN     | 0.19   | legumain                                                      |

|            |           |        |                                                                    |
|------------|-----------|--------|--------------------------------------------------------------------|
| Q9UPQ0     | LIMCH1    | -0.487 | LIM and calponin homology domains 1                                |
| Q03252     | LMNB2     | 0.167  | lamin B2                                                           |
| Q9Y4K0     | LOXL2     | -0.435 | lysyl oxidase like 2                                               |
| Q93052     | LPP       | -0.314 | LIM domain containing preferred translocation partner in lipoma    |
| P50851-2   | LRBA      | -0.397 | LPS responsive beige-like anchor protein                           |
| O75427     | LRCH4     | 0.188  | leucine rich repeats and calponin homology domain containing 4     |
| Q07954     | LRP1      | -0.289 | LDL receptor related protein 1                                     |
| P30533     | LRPAP1    | 0.178  | LDL receptor related protein associated protein 1                  |
| Q96AG4     | LRRC59    | 0.252  | leucine rich repeat containing 59                                  |
| Q8IWT6     | LRRC8A    | 0.175  | leucine rich repeat containing 8 VRAC subunit A                    |
| Q6NSJ5     | LRRC8E    | 0.183  | leucine rich repeat containing 8 VRAC subunit E                    |
| Q6UWE0     | LRSAM1    | -0.361 | leucine rich repeat and sterile alpha motif containing 1           |
| Q9UFC0     | LRWD1     | 0.158  | leucine rich repeats and WD repeat domain containing 1             |
| Q9BX40     | LSM14B    | 0.364  | LSM family member 14B                                              |
| Q9Y4Z0     | LSM4      | 0.189  | LSM4 homolog, U6 small nuclear RNA and mRNA degradation associated |
| Q9UK45     | LSM7      | 0.216  | LSM7 homolog, U6 small nuclear RNA and mRNA degradation associated |
| Q14766-4   | LTBP1     | -0.565 | latent transforming growth factor beta binding protein 1           |
| O94822-3   | LTN1      | -0.19  | listerin E3 ubiquitin protein ligase 1                             |
| Q96GA3     | LTV1      | -0.257 | LTV1 ribosome biogenesis factor                                    |
| Q9NQ29     | LUC7L     | 0.24   | LUC7 like                                                          |
| Q9Y383     | LUC7L2    | 0.271  | LUC7 like 2, pre-mRNA splicing factor                              |
| O95232     | LUC7L3    | 0.321  | LUC7 like 3 pre-mRNA splicing factor                               |
| Q9NX58     | LYAR      | 0.173  | Ly1 antibody reactive                                              |
| Q5U5X0     | LYRM7     | 0.319  | LYR motif containing 7                                             |
| Q8WZA0-2   | LZIC      | -0.379 | leucine zipper and CTNNBIP1 domain containing                      |
| Q9UPN3     | MACF1     | -0.34  | microtubule actin crosslinking factor 1                            |
| Q9UPN3-5   | MACF1     | -0.255 | microtubule actin crosslinking factor 1                            |
| O75367     | MACROH2A1 | 0.252  | macroH2A.1 histone                                                 |
| Q9Y6D9     | MAD1L1    | -0.186 | mitotic arrest deficient 1 like 1                                  |
| Q8WXG6-4   | MADD      | 0.209  | MAP kinase activating death domain                                 |
| Q9ULX9     | MAFF      | 0.885  | MAF bZIP transcription factor F                                    |
| O00754     | MAN2B1    | 0.141  | mannosidase alpha class 2B member 1                                |
| O00462     | MANBA     | -0.209 | mannosidase beta                                                   |
| P46821     | MAP1B     | -0.221 | microtubule associated protein 1B                                  |
| P11137     | MAP2      | -0.164 | microtubule associated protein 2                                   |
| Q9Y6R4-1   | MAP3K4    | -0.284 | mitogen-activated protein kinase kinase kinase 4                   |
| P27816-1   | MAP4      | -0.278 | microtubule associated protein 4                                   |
| Q16644     | MAPKAPK3  | -0.201 | MAPK activated protein kinase 3                                    |
| Q969Z3-1   | MARC2     | 0.194  | mitochondrial amidoxime reducing component 2                       |
| P49006     | MARCKSL1  | 0.336  | MARCKS like 1                                                      |
| Q96GX5     | MASTL     | 0.323  | microtubule associated serine/threonine kinase like                |
| Q9NZL9     | MAT2B     | 0.152  | methionine adenosyltransferase 2B                                  |
| A0A0R4J2E8 | MATR3     | 0.149  | matrin 3                                                           |
| P43121     | MCAM      | 0.212  | melanoma cell adhesion molecule                                    |
| P23508-2   | MCC       | -0.536 | MCC regulator of WNT signaling pathway                             |
| Q96RQ3     | MCCC1     | 0.124  | methylcrotonoyl-CoA carboxylase 1                                  |
| Q96EZ8-2   | MCRS1     | -0.563 | microspherule protein 1                                            |

|          |           |        |                                                                             |
|----------|-----------|--------|-----------------------------------------------------------------------------|
| P40926   | MDH2      | 0.276  | malate dehydrogenase 2                                                      |
| P48163   | ME1       | -0.181 | malic enzyme 1                                                              |
| P23368   | ME2       | 0.22   | malic enzyme 2                                                              |
| P51608-2 | MECP2     | 0.222  | methyl-CpG binding protein 2                                                |
| Q15648   | MED1      | 0.305  | mediator complex subunit 1                                                  |
| Q9H944   | MED20     | 0.28   | mediator complex subunit 20                                                 |
| Q9Y316   | MEMO1     | -0.359 | mediator of cell motility 1                                                 |
| Q7L2J0-1 | MEPCE     | 0.368  | methylphosphate capping enzyme                                              |
| Q9H8H3   | METTL7A   | 0.26   | methyltransferase like 7A                                                   |
| P55081   | MFAP1     | 0.259  | microfibril associated protein 1                                            |
| O95140   | MFN2      | 0.175  | mitofusin 2                                                                 |
| P26572   | MGAT1     | 0.235  | mannosyl (alpha-1,3-)-glycoprotein beta-1,2-N-acetylglucosaminyltransferase |
| Q99685   | MGLL      | -0.479 | monoglyceride lipase                                                        |
| Q9BQP7   | MGME1     | 0.512  | mitochondrial genome maintenance exonuclease 1                              |
| Q96PC5   | MIA2      | 0.176  | MIA SH3 domain ER export factor 2                                           |
| O94851-4 | MICAL2    | -0.294 | microtubule associated monoxygenase, calponin and LIM domain containing 2   |
| Q7RTP6   | MICAL3    | -0.212 | microtubule associated monoxygenase, calponin and LIM domain containing 3   |
| Q99797   | MIPEP     | -0.182 | mitochondrial intermediate peptidase                                        |
| P46013   | MKI67     | 0.247  | marker of proliferation Ki-67                                               |
| Q14165   | MLEC      | 0.194  | malectin                                                                    |
| Q8NB16   | MLKL      | -0.174 | mixed lineage kinase domain like pseudokinase                               |
| Q13015   | MLLT11    | 0.298  | MLLT11 transcription factor 7 cofactor                                      |
| Q9Y4U1   | MMACHC    | -0.521 | metabolism of cobalamin associated C                                        |
| Q8N4V1   | MMGT1     | 0.68   | membrane magnesium transporter 1                                            |
| P50281   | MMP14     | -0.127 | matrix metalloproteinase 14                                                 |
| Q96T76-8 | MMS19     | -0.208 | MMS19 homolog, cytosolic iron-sulfur assembly component                     |
| Q7Z3U7   | MON2      | -0.259 | MON2 homolog, regulator of endosome-to-Golgi trafficking                    |
| Q14149   | MORC3     | 0.143  | MORC family CW-type zinc finger 3                                           |
| Q15014   | MORF4L2   | 0.163  | mortality factor 4 like 2                                                   |
| Q8NHP6   | MOSPD2    | 0.453  | motile sperm domain containing 2                                            |
| O00566   | MPHOSPH10 | 0.251  | M-phase phosphoprotein 10                                                   |
| Q99547   | MPHOSPH6  | 0.422  | M-phase phosphoprotein 6                                                    |
| Q99549   | MPHOSPH8  | 0.156  | M-phase phosphoprotein 8                                                    |
| P39210   | MPV17     | 0.252  | mitochondrial inner membrane protein MPV17                                  |
| Q9UBG0   | MRC2      | -0.132 | mannose receptor C type 2                                                   |
| P49959-3 | MRE11     | 0.196  | MRE11 homolog, double strand break repair nuclease                          |
| Q9HC36   | MRM3      | 0.341  | mitochondrial rRNA methyltransferase 3                                      |
| Q9Y3B7-1 | MRPL11    | 0.147  | mitochondrial ribosomal protein L11                                         |
| Q9NX20   | MRPL16    | 0.207  | mitochondrial ribosomal protein L16                                         |
| Q9NRX2   | MRPL17    | 0.19   | mitochondrial ribosomal protein L17                                         |
| P49406   | MRPL19    | 0.255  | mitochondrial ribosomal protein L19                                         |
| P09001   | MRPL3     | 0.261  | mitochondrial ribosomal protein L3                                          |
| Q9NYK5   | MRPL39    | 0.145  | mitochondrial ribosomal protein L39                                         |
| Q9BRJ2   | MRPL45    | 0.217  | mitochondrial ribosomal protein L45                                         |
| Q4U2R6   | MRPL51    | 0.244  | mitochondrial ribosomal protein L51                                         |
| Q86TS9   | MRPL52    | 0.333  | mitochondrial ribosomal protein L52                                         |
| Q6P161   | MRPL54    | -0.136 | mitochondrial ribosomal protein L54                                         |

|                 |         |        |                                                                                       |
|-----------------|---------|--------|---------------------------------------------------------------------------------------|
| <b>Q9BQC6</b>   | MRPL57  | 0.32   | mitochondrial ribosomal protein L57                                                   |
| <b>P82912</b>   | MRPS11  | 0.256  | mitochondrial ribosomal protein S11                                                   |
| <b>O15235</b>   | MRPS12  | 0.488  | mitochondrial ribosomal protein S12                                                   |
| <b>Q9Y3D5</b>   | MRPS18C | 0.362  | mitochondrial ribosomal protein S18C                                                  |
| <b>Q9BYN8</b>   | MRPS26  | 0.183  | mitochondrial ribosomal protein S26                                                   |
| <b>Q9NP92</b>   | MRPS30  | 0.213  | mitochondrial ribosomal protein S30                                                   |
| <b>P82909</b>   | MRPS36  | 0.271  | mitochondrial ribosomal protein S36                                                   |
| <b>P82675</b>   | MRPS5   | 0.164  | mitochondrial ribosomal protein S5                                                    |
| <b>P82932</b>   | MRPS6   | 0.277  | mitochondrial ribosomal protein S6                                                    |
| <b>Q96E11</b>   | MRRF    | 0.121  | mitochondrial ribosome recycling factor                                               |
| <b>P04731</b>   | MT1A    | 1.035  | metallothionein 1A                                                                    |
| <b>O94776</b>   | MTA2    | 0.237  | metastasis associated 1 family member 2                                               |
| <b>Q9NZJ7</b>   | MTCH1   | 0.137  | mitochondrial carrier 1                                                               |
| <b>Q6UB35-1</b> | MTHFD1L | -0.212 | methylenetetrahydrofolate dehydrogenase (NADP+ dependent) 1 like                      |
| <b>P13995</b>   | MTHFD2  | 0.311  | methylenetetrahydrofolate dehydrogenase (NADP+ dependent) 2, methenyltetrahydrofolate |
| <b>P42345</b>   | MTOR    | -0.184 | mechanistic target of rapamycin kinase                                                |
| <b>P58546</b>   | MTPN    | -0.451 | myotrophin                                                                            |
| <b>Q99707</b>   | MTR     | -0.241 | 5-methyltetrahydrofolate-homocysteine methyltransferase                               |
| <b>Q13505</b>   | MTX1    | 0.15   | metaxin 1                                                                             |
| <b>O75431</b>   | MTX2    | 0.162  | metaxin 2                                                                             |
| <b>Q5HYI7</b>   | MTX3    | 0.391  | metaxin 3                                                                             |
| <b>Q03426</b>   | MVK     | -0.309 | mevalonate kinase                                                                     |
| <b>Q9BQG0-2</b> | MYBBP1A | -0.189 | MYB binding protein 1a                                                                |
| <b>O75592-1</b> | MYCBP2  | -0.362 | MYC binding protein 2                                                                 |
| <b>Q969H8</b>   | MYDGF   | 0.265  | myeloid derived growth factor                                                         |
| <b>P35579</b>   | MYH9    | -0.225 | myosin heavy chain 9                                                                  |
| <b>P24844-1</b> | MYL9    | -0.613 | myosin light chain 9                                                                  |
| <b>Q12965</b>   | MYO1E   | -0.29  | myosin IE                                                                             |
| <b>Q13459</b>   | MYO9B   | -0.275 | myosin IXB                                                                            |
| <b>Q9NZM1</b>   | MYOF    | -0.139 | myoferlin                                                                             |
| <b>Q9Y2G1</b>   | MYRF    | -0.443 | myelin regulatory factor                                                              |
| <b>Q14CX7</b>   | NAA25   | -0.192 | N(alpha)-acetyltransferase 25, NatB auxiliary subunit                                 |
| <b>Q9GZZ1-1</b> | NAA50   | -0.2   | N(alpha)-acetyltransferase 50, NatE catalytic subunit                                 |
| <b>E9PAV3</b>   | NACA    | -0.449 | nascent polypeptide associated complex subunit alpha                                  |
| <b>P54920</b>   | NAPA    | -0.22  | NSF attachment protein alpha                                                          |
| <b>Q8NEY1</b>   | NAV1    | -0.526 | neuron navigator 1                                                                    |
| <b>A2RRP1</b>   | NBAS    | -0.244 | NBAS subunit of NRZ tethering complex                                                 |
| <b>Q53F19</b>   | NCBP3   | 0.234  | nuclear cap binding subunit 3                                                         |
| <b>Q9UBB6-3</b> | NCDN    | -0.156 | neurochondrin                                                                         |
| <b>O43639</b>   | NCK2    | -0.225 | NCK adaptor protein 2                                                                 |
| <b>Q9NXR1-1</b> | NDE1    | -0.208 | nudE neurodevelopment protein 1                                                       |
| <b>Q9UGV2</b>   | NDRG3   | -0.28  | NDRG family member 3                                                                  |
| <b>O95299</b>   | NDUFA10 | 0.197  | NADH:ubiquinone oxidoreductase subunit A10                                            |
| <b>O43678</b>   | NDUFA2  | 0.18   | NADH:ubiquinone oxidoreductase subunit A2                                             |
| <b>Q16718</b>   | NDUFA5  | 0.178  | NADH:ubiquinone oxidoreductase subunit A5                                             |
| <b>P56556</b>   | NDUFA6  | 0.279  | NADH:ubiquinone oxidoreductase subunit A6                                             |
| <b>O95182</b>   | NDUFA7  | 0.236  | NADH:ubiquinone oxidoreductase subunit A7                                             |

|                 |           |        |                                                |
|-----------------|-----------|--------|------------------------------------------------|
| <b>O75438</b>   | NDUFB1    | 0.331  | NADH:ubiquinone oxidoreductase subunit B1      |
| <b>O96000</b>   | NDUFB10   | 0.239  | NADH:ubiquinone oxidoreductase subunit B10     |
| <b>Q9NX14-2</b> | NDUFB11   | 0.188  | NADH:ubiquinone oxidoreductase subunit B11     |
| <b>O43674-1</b> | NDUFB5    | 0.231  | NADH:ubiquinone oxidoreductase subunit B5      |
| <b>O95139</b>   | NDUFB6    | 0.136  | NADH:ubiquinone oxidoreductase subunit B6      |
| <b>O95169</b>   | NDUFB8    | 0.175  | NADH:ubiquinone oxidoreductase subunit B8      |
| <b>Q9Y6M9</b>   | NDUFB9    | 0.285  | NADH:ubiquinone oxidoreductase subunit B9      |
| <b>O95298</b>   | NDUFC2    | 0.202  | NADH:ubiquinone oxidoreductase subunit C2      |
| <b>O43920</b>   | NDUFS5    | 0.151  | NADH:ubiquinone oxidoreductase subunit S5      |
| <b>O75380</b>   | NDUFS6    | 0.257  | NADH:ubiquinone oxidoreductase subunit S6      |
| <b>O75251</b>   | NDUFS7    | 0.19   | NADH:ubiquinone oxidoreductase core subunit S7 |
| <b>O00217</b>   | NDUFS8    | 0.245  | NADH:ubiquinone oxidoreductase core subunit S8 |
| <b>P49821</b>   | NDUFV1    | 0.21   | NADH:ubiquinone oxidoreductase core subunit V1 |
| <b>P46934-4</b> | NEDD4     | -0.273 | NEDD4 E3 ubiquitin protein ligase              |
| <b>Q96PU5</b>   | NEDD4L    | -0.361 | NEDD4 like E3 ubiquitin protein ligase         |
| <b>Q8IXH7</b>   | NELFCD    | 0.188  | negative elongation factor complex member C/D  |
| <b>P18615</b>   | NELFE     | 0.155  | negative elongation factor complex member E    |
| <b>O60524</b>   | NEMF      | -0.181 | nuclear export mediator factor                 |
| <b>P19838-2</b> | NFKB1     | -0.157 | nuclear factor kappa B subunit 1               |
| <b>Q96IV0</b>   | NGLY1     | -0.399 | N-glycanase 1                                  |
| <b>Q8NBF2</b>   | NHLRC2    | -0.18  | NHL repeat containing 2                        |
| <b>Q9BZQ8</b>   | NIBAN1    | -0.264 | niban apoptosis regulator 1                    |
| <b>Q96TA1</b>   | NIBAN2    | -0.208 | niban apoptosis regulator 2                    |
| <b>Q9BPW8</b>   | NIPSNAP1  | 0.286  | nipsnap homolog 1                              |
| <b>O75323-1</b> | NIPSNAP2  | 0.534  | nipsnap homolog 2                              |
| <b>Q9UFN0</b>   | NIPSNAP3A | 0.164  | nipsnap homolog 3A                             |
| <b>Q9Y2I1</b>   | NISCH     | 0.225  | nischarin                                      |
| <b>Q86X76-3</b> | NIT1      | 0.862  | nitrilase 1                                    |
| <b>O15226-2</b> | NKRF      | 0.218  | NFKB repressing factor                         |
| <b>P30414</b>   | NKTR      | 0.376  | natural killer cell triggering receptor        |
| <b>Q13423</b>   | NNT       | 0.165  | nicotinamide nucleotide transhydrogenase       |
| <b>Q8WTT2</b>   | NOC3L     | 0.218  | NOC3 like DNA replication regulator            |
| <b>Q9BVI4</b>   | NOC4L     | -0.15  | nucleolar complex associated 4 homolog         |
| <b>Q15233</b>   | NONO      | 0.157  | non-POU domain containing octamer binding      |
| <b>Q9NZM5</b>   | NOP53     | -0.601 | NOP53 ribosome biogenesis factor               |
| <b>O00567</b>   | NOP56     | 0.16   | NOP56 ribonucleoprotein                        |
| <b>Q9Y2X3</b>   | NOP58     | 0.135  | NOP58 ribonucleoprotein                        |
| <b>O15118</b>   | NPC1      | 0.169  | NPC intracellular cholesterol transporter 1    |
| <b>P06748-2</b> | NPM1      | 0.842  | nucleophosmin 1                                |
| <b>Q12980</b>   | NPRL3     | -0.343 | NPR3 like, GATOR1 complex subunit              |
| <b>P15559-1</b> | NQO1      | 0.217  | NAD(P)H quinone dehydrogenase 1                |
| <b>P13056-1</b> | NR2C1     | -0.657 | nuclear receptor subfamily 2 group C member 1  |
| <b>P04150-3</b> | NR3C1     | 0.225  | nuclear receptor subfamily 3 group C member 1  |
| <b>O14786-1</b> | NRP1      | -0.369 | neuropilin 1                                   |
| <b>O95478</b>   | NSA2      | -0.454 | NSA2 ribosome biogenesis factor                |
| <b>O96028-1</b> | NSD2      | -0.189 | nuclear receptor binding SET domain protein 2  |
| <b>Q9H857-2</b> | NT5DC2    | 0.137  | 5'-nucleotidase domain containing 2            |

|          |          |        |                                                                   |
|----------|----------|--------|-------------------------------------------------------------------|
| Q9Y266   | NUDC     | -0.285 | nuclear distribution C, dynein complex regulator                  |
| Q96RS6   | NUDCD1   | -0.171 | NudC domain containing 1                                          |
| A8MXV4   | NUDT19   | 0.266  | nudix hydrolase 19                                                |
| O43809   | NUDT21   | 0.221  | nudix hydrolase 21                                                |
| Q7Z417   | NUFIP2   | 0.293  | nuclear FMR1 interacting protein 2                                |
| P49757   | NUMB     | -0.194 | NUMB endocytic adaptor protein                                    |
| Q8NFH3   | NUP43    | 0.167  | nucleoporin 43                                                    |
| Q9UKX7   | NUP50    | 0.17   | nucleoporin 50                                                    |
| Q9UBU9-1 | NXF1     | 0.351  | nuclear RNA export factor 1                                       |
| Q9Y530   | OARD1    | -0.636 | O-acyl-ADP-ribose deacylase 1                                     |
| P04181   | OAT      | 0.22   | ornithine aminotransferase                                        |
| Q56VL3   | OCIAD2   | 0.209  | OCIA domain containing 2                                          |
| Q8N543   | OGFOD1   | 0.154  | 2-oxoglutarate and iron dependent oxygenase domain containing 1   |
| O15294   | OGT      | -0.133 | O-linked N-acetylglucosamine (GlcNAc) transferase                 |
| Q9NTK5-1 | OLA1     | -0.234 | Obg like ATPase 1                                                 |
| O60313-2 | OPA1     | 0.119  | OPA1 mitochondrial dynamin like GTPase                            |
| Q9BXB4   | OSBPL11  | 0.146  | oxysterol binding protein like 11                                 |
| Q92882   | OSTF1    | -0.464 | osteoclast stimulating factor 1                                   |
| Q96FW1   | OTUB1    | -0.236 | OTU deubiquitinase, ubiquitin aldehyde binding 1                  |
| P55809   | OXCT1    | 0.222  | 3-oxoacid CoA-transferase 1                                       |
| Q8N573-1 | OXR1     | -0.273 | oxidation resistance 1                                            |
| O95747   | OXSR1    | -0.175 | oxidative stress responsive kinase 1                              |
| Q8IVL5   | P3H2     | -0.319 | prolyl 3-hydroxylase 2                                            |
| P11940   | PABPC1   | -0.154 | poly(A) binding protein cytoplasmic 1                             |
| Q6VY07   | PACS1    | -0.312 | phosphofurin acidic cluster sorting protein 1                     |
| Q9UKS6   | PACSIN3  | 0.211  | protein kinase C and casein kinase substrate in neurons 3         |
| Q8N7H5   | PAF1     | 0.28   | PAF1 homolog, Paf1/RNA polymerase II complex component            |
| P68402   | PAFAH1B2 | -0.182 | platelet activating factor acetylhydrolase 1b catalytic subunit 2 |
| Q9H074   | PAIP1    | -0.209 | poly(A) binding protein interacting protein 1                     |
| Q8WX93-1 | PALLD    | -0.208 | palladin, cytoskeletal associated protein                         |
| Q96RD7-1 | PANX1    | 0.193  | pannexin 1                                                        |
| Q8TEW0   | PARD3    | -0.379 | par-3 family cell polarity regulator                              |
| O95453   | PARN     | -0.285 | poly(A)-specific ribonuclease                                     |
| P09874   | PARP1    | 0.139  | poly(ADP-ribose) polymerase 1                                     |
| Q9UKK3   | PARP4    | -0.151 | poly(ADP-ribose) polymerase family member 4                       |
| Q7L3T8   | PARS2    | 0.172  | prolyl-tRNA synthetase 2, mitochondrial                           |
| Q9HBI1   | PARVB    | -0.254 | parvin beta                                                       |
| Q96IZ0   | PAWR     | -0.276 | pro-apoptotic WT1 regulator                                       |
| Q9Y5B6   | PAXBP1   | 0.419  | PAX3 and PAX7 binding protein 1                                   |
| Q96AQ6   | PBXIP1   | 0.149  | PBX homeobox interacting protein 1                                |
| Q16822   | PCK2     | 0.185  | phosphoenolpyruvate carboxykinase 2, mitochondrial                |
| Q15004   | PCLAF    | 0.453  | PCNA clamp associated factor                                      |
| Q8NBM8   | PCYOX1L  | 0.29   | prenylcysteine oxidase 1 like                                     |
| Q99447-3 | PCYT2    | -0.216 | phosphate cytidyltransferase 2, ethanolamine                      |
| Q14690   | PDCD11   | -0.136 | programmed cell death 11                                          |
| Q53EL6   | PDCD4    | 0.304  | programmed cell death 4                                           |
| Q9H2J4   | PDCL3    | -0.159 | phosducin like 3                                                  |

|          |         |        |                                                                          |
|----------|---------|--------|--------------------------------------------------------------------------|
| P08559-4 | PDHA1   | 0.252  | pyruvate dehydrogenase E1 alpha 1 subunit                                |
| P11177   | PDHB    | 0.191  | pyruvate dehydrogenase E1 beta subunit                                   |
| P30101   | PDIA3   | 0.193  | protein disulfide isomerase family A member 3                            |
| Q14554   | PDIA5   | 0.155  | protein disulfide isomerase family A member 5                            |
| Q96HC4   | PDLIM5  | -0.208 | PDZ and LIM domain 5                                                     |
| Q9POJ1-2 | PDP1    | 0.29   | pyruvate dehydrogenase phosphatase catalytic subunit 1                   |
| Q5EBL8-2 | PDZD11  | -0.243 | PDZ domain containing 11                                                 |
| Q9BY49-1 | PECR    | 0.525  | peroxisomal trans-2-enoyl-CoA reductase                                  |
| Q9BRX2   | PELO    | 0.152  | pelota mRNA surveillance and ribosome rescue factor                      |
| P07737   | PFN1    | -0.488 | profilin 1                                                               |
| P35080-2 | PFN2    | -0.288 | profilin 2                                                               |
| Q96HS1-1 | PGAM5   | 0.175  | PGAM family member 5, mitochondrial serine/threonine protein phosphatase |
| O75167-4 | PHACTR2 | -0.365 | phosphatase and actin regulator 2                                        |
| P35232   | PHB     | 0.308  | prohibitin                                                               |
| Q99623   | PHB2    | 0.223  | prohibitin 2                                                             |
| O43189   | PHF1    | 0.729  | PHD finger protein 1                                                     |
| Q8WWQ0   | PHIP    | 0.312  | pleckstrin homology domain interacting protein                           |
| Q9BTU6   | PI4K2A  | 0.286  | phosphatidylinositol 4-kinase type 2 alpha                               |
| P42356   | PI4KA   | -0.143 | phosphatidylinositol 4-kinase alpha                                      |
| Q5H8A4-1 | PIGG    | 0.227  | phosphatidylinositol glycan anchor biosynthesis class G                  |
| O43164   | PJA2    | -0.208 | praja ring finger ubiquitin ligase 2                                     |
| P14618-2 | PKM     | -0.157 | pyruvate kinase M1/2                                                     |
| Q99640   | PKMYT1  | 0.509  | protein kinase, membrane associated tyrosine/threonine 1                 |
| Q16512-2 | PKN1    | -0.145 | protein kinase N1                                                        |
| Q16513   | PKN2    | -0.196 | protein kinase N2                                                        |
| Q8NCC3   | PLA2G15 | 0.191  | phospholipase A2 group XV                                                |
| P47712   | PLA2G4A | -0.248 | phospholipase A2 group IVA                                               |
| Q8NHP8   | PLBD2   | 0.378  | phospholipase B domain containing 2                                      |
| Q8N3E9   | PLCD3   | 0.262  | phospholipase C delta 3                                                  |
| Q8IV08   | PLD3    | 0.144  | phospholipase D family member 3                                          |
| Q9HAU0-6 | PLEKHA5 | -0.157 | pleckstrin homology domain containing A5                                 |
| P00747   | PLG     | -0.241 | plasminogen                                                              |
| Q9HBL7   | PLGRKT  | 0.28   | plasminogen receptor with a C-terminal lysine                            |
| O60568   | PLOD3   | 0.158  | procollagen-lysine,2-oxoglutarate 5-dioxygenase 3                        |
| Q14651   | PLS1    | -0.268 | plastin 1                                                                |
| P13797   | PLS3    | -0.206 | plastin 3                                                                |
| O75051   | PLXNA2  | -0.445 | plexin A2                                                                |
| O15305   | PMM2    | -0.284 | phosphomannomutase 2                                                     |
| Q10713   | PMPCA   | 0.207  | peptidase, mitochondrial processing alpha subunit                        |
| O75439   | PMPCB   | 0.202  | peptidase, mitochondrial processing beta subunit                         |
| Q15126   | PMVK    | -0.186 | phosphomevalonate kinase                                                 |
| Q9H307   | PNN     | 0.135  | pinin, desmosome associated protein                                      |
| Q9NRX1   | PNO1    | -0.541 | partner of NOB1 homolog                                                  |
| Q9H488   | POFUT1  | 0.205  | protein O-fucosyltransferase 1                                           |
| Q8NBL1   | POGLUT1 | 0.272  | protein O-glucosyltransferase 1                                          |
| Q6UW63   | POGLUT2 | 0.182  | protein O-glucosyltransferase 2                                          |
| Q724H8   | POGLUT3 | 0.168  | protein O-glucosyltransferase 3                                          |

|                 |                |        |                                                                      |
|-----------------|----------------|--------|----------------------------------------------------------------------|
| <b>P09884</b>   | POLA1          | -0.228 | DNA polymerase alpha 1, catalytic subunit                            |
| <b>P06746</b>   | POLB           | 0.224  | DNA polymerase beta                                                  |
| <b>P52434</b>   | POLR2H         | -0.346 | RNA polymerase II subunit H                                          |
| <b>P36954</b>   | POLR2I         | -0.317 | RNA polymerase II subunit I                                          |
| <b>P05423</b>   | POLR3D         | -0.171 | RNA polymerase III subunit D                                         |
| <b>Q96HA1</b>   | POM121/POM121C | 0.253  | POM121 transmembrane nucleoporin                                     |
| <b>Q9H2U2-2</b> | PPA2           | 0.177  | inorganic pyrophosphatase 2                                          |
| <b>P62937</b>   | PPIA           | -0.281 | peptidylprolyl isomerase A                                           |
| <b>P23284</b>   | PPIB           | 0.18   | peptidylprolyl isomerase B                                           |
| <b>Q9UNP9</b>   | PPIE           | 0.344  | peptidylprolyl isomerase E                                           |
| <b>P30405</b>   | PPIF           | 0.462  | peptidylprolyl isomerase F                                           |
| <b>O15355</b>   | PPM1G          | 0.148  | protein phosphatase, Mg <sup>2+</sup> /Mn <sup>2+</sup> dependent 1G |
| <b>Q96QC0</b>   | PPP1R10        | 0.221  | protein phosphatase 1 regulatory subunit 10                          |
| <b>Q8WUF5</b>   | PPP1R13L       | -0.228 | protein phosphatase 1 regulatory subunit 13 like                     |
| <b>Q96C90</b>   | PPP1R14B       | -0.319 | protein phosphatase 1 regulatory inhibitor subunit 14B               |
| <b>Q6NYC8</b>   | PPP1R18        | 0.186  | protein phosphatase 1 regulatory subunit 18                          |
| <b>Q12972</b>   | PPP1R8         | 0.262  | protein phosphatase 1 regulatory subunit 8                           |
| <b>P30153</b>   | PPP2R1A        | -0.166 | protein phosphatase 2 scaffold subunit Aalpha                        |
| <b>Q08209</b>   | PPP3CA         | -0.427 | protein phosphatase 3 catalytic subunit alpha                        |
| <b>Q9NY27</b>   | PPP4R2         | 0.147  | protein phosphatase 4 regulatory subunit 2                           |
| <b>Q5H9R7-5</b> | PPP6R3         | -0.3   | protein phosphatase 6 regulatory subunit 3                           |
| <b>P50897</b>   | PPT1           | 0.299  | palmitoyl-protein thioesterase 1                                     |
| <b>O60828</b>   | PQBP1          | 0.344  | polyglutamine binding protein 1                                      |
| <b>Q86YV5</b>   | PRAG1          | -0.848 | PEAK1 related, kinase-activating pseudokinase 1                      |
| <b>O43663</b>   | PRC1           | 0.29   | protein regulator of cytokinesis 1                                   |
| <b>Q06830</b>   | PRDX1          | 0.153  | peroxiredoxin 1                                                      |
| <b>P48147</b>   | PREP           | -0.213 | prolyl endopeptidase                                                 |
| <b>P49642</b>   | PRIM1          | -0.184 | DNA primase subunit 1                                                |
| <b>P49643</b>   | PRIM2          | -0.219 | DNA primase subunit 2                                                |
| <b>P17612</b>   | PRKACA         | -0.247 | protein kinase cAMP-activated catalytic subunit alpha                |
| <b>P22694</b>   | PRKACB         | -0.506 | protein kinase cAMP-activated catalytic subunit beta                 |
| <b>P10644</b>   | PRKAR1A        | -0.316 | protein kinase cAMP-dependent type I regulatory subunit alpha        |
| <b>P17252</b>   | PRKCA          | -0.27  | protein kinase C alpha                                               |
| <b>O15091</b>   | PRORP          | -0.281 | protein only RNase P catalytic subunit                               |
| <b>Q9UMS4</b>   | PRPF19         | 0.2    | pre-mRNA processing factor 19                                        |
| <b>O43395</b>   | PRPF3          | 0.214  | pre-mRNA processing factor 3                                         |
| <b>O43172</b>   | PRPF4          | 0.178  | pre-mRNA processing factor 4                                         |
| <b>Q13523</b>   | PRPF4B         | 0.249  | pre-mRNA processing factor 4B                                        |
| <b>P25788</b>   | PSMA3          | 0.143  | proteasome subunit alpha 3                                           |
| <b>O14818-1</b> | PSMA7          | 0.172  | proteasome subunit alpha 7                                           |
| <b>P28074-1</b> | PSMB5          | 0.125  | proteasome subunit beta 5                                            |
| <b>P28065</b>   | PSMB9          | -0.185 | proteasome subunit beta 9                                            |
| <b>P35998</b>   | PSMC2          | 0.153  | proteasome 26S subunit, ATPase 2                                     |
| <b>P17980</b>   | PSMC3          | 0.141  | proteasome 26S subunit, ATPase 3                                     |
| <b>P43686</b>   | PSMC4          | 0.122  | proteasome 26S subunit, ATPase 4                                     |
| <b>P62333</b>   | PSMC6          | 0.224  | proteasome 26S subunit, ATPase 6                                     |
| <b>O43242</b>   | PSMD3          | 0.18   | proteasome 26S subunit, non-ATPase 3                                 |

|                 |          |        |                                                            |
|-----------------|----------|--------|------------------------------------------------------------|
| <b>Q16401</b>   | PSMD5    | -0.276 | proteasome 26S subunit, non-ATPase 5                       |
| <b>Q9H939-1</b> | PSTPIP2  | 0.16   | proline-serine-threonine phosphatase interacting protein 2 |
| <b>O95758-4</b> | PTBP3    | 0.208  | polypyrimidine tract binding protein 3                     |
| <b>Q15185</b>   | PTGES3   | -0.489 | prostaglandin E synthase 3                                 |
| <b>Q14914</b>   | PTGR1    | 0.158  | prostaglandin reductase 1                                  |
| <b>Q05397-5</b> | PTK2     | -0.336 | protein tyrosine kinase 2                                  |
| <b>Q05209</b>   | PTPN12   | -0.257 | protein tyrosine phosphatase non-receptor type 12          |
| <b>Q15678</b>   | PTPN14   | -0.215 | protein tyrosine phosphatase non-receptor type 14          |
| <b>P10586-1</b> | PTPRF    | -0.325 | protein tyrosine phosphatase receptor type F               |
| <b>Q15262-3</b> | PTPRK    | -0.712 | protein tyrosine phosphatase receptor type K               |
| <b>Q9Y3E5</b>   | PTRH2    | 0.279  | peptidyl-tRNA hydrolase 2                                  |
| <b>Q6GMV3</b>   | PTRHD1   | 0.263  | peptidyl-tRNA hydrolase domain containing 1                |
| <b>Q15397</b>   | PUM3     | -0.371 | pumilio RNA binding family member 3                        |
| <b>Q00577</b>   | PURA     | 0.234  | purine rich element binding protein A                      |
| <b>Q92626</b>   | PXDN     | -0.309 | peroxidasin                                                |
| <b>Q96C36</b>   | PYCR2    | 0.277  | pyrroline-5-carboxylate reductase 2                        |
| <b>Q9UL25</b>   | RAB21    | 0.202  | RAB21, member RAS oncogene family                          |
| <b>P20337</b>   | RAB3B    | -0.203 | RAB3B, member RAS oncogene family                          |
| <b>Q9BUV8-5</b> | RAB5IF   | 0.431  | RAB5 interacting factor                                    |
| <b>P61006</b>   | RAB8A    | 0.233  | RAB8A, member RAS oncogene family                          |
| <b>P51151</b>   | RAB9A    | 0.264  | RAB9A, member RAS oncogene family                          |
| <b>Q9Y3P9</b>   | RABGAP1  | -0.193 | RAB GTPase activating protein 1                            |
| <b>Q5R372-3</b> | RABGAP1L | -0.45  | RAB GTPase activating protein 1 like                       |
| <b>P54727</b>   | RAD23B   | -0.425 | RAD23 homolog B, nucleotide excision repair protein        |
| <b>O43502</b>   | RAD51C   | 0.669  | RAD51 paralog C                                            |
| <b>P78406</b>   | RAE1     | 0.229  | ribonucleic acid export 1                                  |
| <b>Q6VN20</b>   | RANBP10  | 0.237  | RAN binding protein 10                                     |
| <b>P52306-5</b> | RAP1GDS1 | -0.509 | Rap1 GTPase-GDP dissociation stimulator 1                  |
| <b>Q8TEU7-4</b> | RAPGEF6  | -0.296 | Rap guanine nucleotide exchange factor 6                   |
| <b>P20936-1</b> | RASA1    | -0.239 | RAS p21 protein activator 1                                |
| <b>Q14644</b>   | RASA3    | -0.297 | RAS p21 protein activator 3                                |
| <b>Q9UJF2-2</b> | RASAL2   | -0.411 | RAS protein activator like 2                               |
| <b>Q09028</b>   | RBBP4    | 0.202  | RB binding protein 4, chromatin remodeling factor          |
| <b>Q726E9</b>   | RBBP6    | 0.413  | RB binding protein 6, ubiquitin ligase                     |
| <b>Q16576-1</b> | RBBP7    | 0.237  | RB binding protein 7, chromatin remodeling factor          |
| <b>O43251-8</b> | RBFOX2   | -0.208 | RNA binding fox-1 homolog 2                                |
| <b>Q9NTZ6</b>   | RBM12    | -0.315 | RNA binding motif protein 12                               |
| <b>Q96T37</b>   | RBM15    | 0.162  | RNA binding motif protein 15                               |
| <b>Q9NW64</b>   | RBM22    | 0.206  | RNA binding motif protein 22                               |
| <b>Q5T8P6-2</b> | RBM26    | 0.329  | RNA binding motif protein 26                               |
| <b>P52756</b>   | RBM5     | 0.455  | RNA binding motif protein 5                                |
| <b>Q9Y388</b>   | RBMX2    | 0.595  | RNA binding motif protein X-linked 2                       |
| <b>Q93062-3</b> | RBPMS    | -0.335 | RNA binding protein, mRNA processing factor                |
| <b>P18754-2</b> | RCC1     | 0.268  | regulator of chromosome condensation 1                     |
| <b>Q96I51</b>   | RCC1L    | 0.224  | RCC1 like                                                  |
| <b>Q14257</b>   | RCN2     | 0.27   | reticulocalbin 2                                           |
| <b>Q6NUK4</b>   | REEP3    | 0.253  | receptor accessory protein 3                               |

|                 |          |        |                                                                      |
|-----------------|----------|--------|----------------------------------------------------------------------|
| <b>Q00765</b>   | REEP5    | 0.177  | receptor accessory protein 5                                         |
| <b>Q6NUM9-1</b> | RETSAT   | 0.28   | retinol saturase                                                     |
| <b>P40938</b>   | RFC3     | 0.273  | replication factor C subunit 3                                       |
| <b>P35249</b>   | RFC4     | 0.249  | replication factor C subunit 4                                       |
| <b>P62745</b>   | RHOB     | 0.248  | ras homolog family member B                                          |
| <b>P84095</b>   | RHOG     | 0.165  | ras homolog family member G                                          |
| <b>Q8IXI1</b>   | RHOT2    | 0.293  | ras homolog family member T2                                         |
| <b>Q5EBL4-1</b> | RILPL1   | -0.381 | Rab interacting lysosomal protein like 1                             |
| <b>Q06587</b>   | RING1    | 0.162  | ring finger protein 1                                                |
| <b>Q9BVS4</b>   | RIOK2    | -0.183 | RIO kinase 2                                                         |
| <b>O14730</b>   | RIOK3    | 0.385  | RIO kinase 3                                                         |
| <b>Q96TC7</b>   | RMDN3    | 0.168  | regulator of microtubule dynamics 3                                  |
| <b>Q96GF1</b>   | RNF185   | 0.27   | ring finger protein 185                                              |
| <b>Q5VTR2</b>   | RNF20    | 0.271  | ring finger protein 20                                               |
| <b>Q63HN8-4</b> | RNF213   | -0.249 | ring finger protein 213                                              |
| <b>O75150</b>   | RNF40    | 0.218  | ring finger protein 40                                               |
| <b>O60942-1</b> | RNGTT    | -0.312 | RNA guanylyltransferase and 5'-phosphatase                           |
| <b>O43148-2</b> | RNMT     | 0.169  | RNA guanine-7 methyltransferase                                      |
| <b>Q15287-1</b> | RNPS1    | 0.285  | RNA binding protein with serine rich domain 1                        |
| <b>Q13464</b>   | ROCK1    | -0.175 | Rho associated coiled-coil containing protein kinase 1               |
| <b>O75116</b>   | ROCK2    | -0.22  | Rho associated coiled-coil containing protein kinase 2               |
| <b>Q9H9Y2</b>   | RPF1     | -0.41  | ribosome production factor 1 homolog                                 |
| <b>Q9H7B2</b>   | RPF2     | -0.17  | ribosome production factor 2 homolog                                 |
| <b>Q6P5R6</b>   | RPL22L1  | -0.746 | ribosomal protein L22 like 1                                         |
| <b>P62829</b>   | RPL23    | -0.208 | ribosomal protein L23                                                |
| <b>P62899</b>   | RPL31    | -0.302 | ribosomal protein L31                                                |
| <b>P63173</b>   | RPL38    | -0.233 | ribosomal protein L38                                                |
| <b>Q6DKI1</b>   | RPL7L1   | -0.302 | ribosomal protein L7 like 1                                          |
| <b>P04843</b>   | RPN1     | 0.154  | ribophorin I                                                         |
| <b>Q9BUL9</b>   | RPP25    | 0.25   | ribonuclease P and MRP subunit p25                                   |
| <b>P78345</b>   | RPP38    | 0.368  | ribonuclease P/MRP subunit p38                                       |
| <b>Q5VT52</b>   | RPRD2    | 0.3    | regulation of nuclear pre-mRNA domain containing 2                   |
| <b>P62263</b>   | RPS14    | -0.213 | ribosomal protein S14                                                |
| <b>P62841</b>   | RPS15    | -0.152 | ribosomal protein S15                                                |
| <b>Q86WX3</b>   | RPS19BP1 | -0.253 | ribosomal protein S19 binding protein 1                              |
| <b>P62854</b>   | RPS26    | -0.147 | ribosomal protein S26                                                |
| <b>P42677</b>   | RPS27    | -0.167 | ribosomal protein S27                                                |
| <b>P62857</b>   | RPS28    | -0.175 | ribosomal protein S28                                                |
| <b>P22090</b>   | RPS4Y1   | -0.345 | ribosomal protein S4 Y-linked 1                                      |
| <b>P08865</b>   | RPSA     | -0.179 | ribosomal protein SA                                                 |
| <b>Q8N122</b>   | RPTOR    | -0.181 | regulatory associated protein of MTOR complex 1                      |
| <b>P55042</b>   | RRAD     | 1.152  | RRAD, Ras related glycolysis inhibitor and calcium channel regulator |
| <b>P31350-2</b> | RRM2     | 0.498  | ribonucleotide reductase regulatory subunit M2                       |
| <b>Q7LG56-6</b> | RRM2B    | 0.429  | ribonucleotide reductase regulatory TP53 inducible subunit M2B       |
| <b>Q9NYV6</b>   | RRN3     | 0.308  | RRN3 homolog, RNA polymerase I transcription factor                  |
| <b>O43818</b>   | RRP9     | 0.116  | ribosomal RNA processing 9, U3 small nucleolar RNA binding protein   |
| <b>Q7L4I2</b>   | RSRC2    | 0.234  | arginine and serine rich coiled-coil 2                               |

|                   |          |        |                                                                  |
|-------------------|----------|--------|------------------------------------------------------------------|
| <b>Q15404</b>     | RSU1     | -0.17  | Ras suppressor protein 1                                         |
| <b>P60903</b>     | S100A10  | -0.285 | S100 calcium binding protein A10                                 |
| <b>Q15424-3</b>   | SAFB     | 0.213  | scaffold attachment factor B                                     |
| <b>Q5K651</b>     | SAMD9    | 0.197  | sterile alpha motif domain containing 9                          |
| <b>Q9NSI8-1</b>   | SAMSN1   | -0.382 | SAM domain, SH3 domain and nuclear localization signals 1        |
| <b>O00422</b>     | SAP18    | 0.27   | Sin3A associated protein 18                                      |
| <b>Q9UHR5-1</b>   | SAP30BP  | 0.227  | SAP30 binding protein                                            |
| <b>O43290</b>     | SART1    | 0.21   | spliceosome associated factor 1, recruiter of U4/U6.U5 tri-snRNP |
| <b>Q8NBX0</b>     | SCCPDH   | 0.159  | saccharopine dehydrogenase (putative)                            |
| <b>Q865K9</b>     | SCD5     | -0.581 | stearoyl-CoA desaturase 5                                        |
| <b>O43819</b>     | SCO2     | 0.264  | SCO cytochrome c oxidase assembly protein 2                      |
| <b>P22307</b>     | SCP2     | 0.167  | sterol carrier protein 2                                         |
| <b>Q9HB40</b>     | SCPEP1   | 0.19   | serine carboxypeptidase 1                                        |
| <b>Q14160-3</b>   | SCRIB    | 0.141  | scribble planar cell polarity protein                            |
| <b>Q99470</b>     | SDF2     | 0.223  | stromal cell derived factor 2                                    |
| <b>P31040</b>     | SDHA     | 0.3    | succinate dehydrogenase complex flavoprotein subunit A           |
| <b>P21912</b>     | SDHB     | 0.206  | succinate dehydrogenase complex iron sulfur subunit B            |
| <b>P55735-3</b>   | SEC13    | -0.325 | SEC13 homolog, nuclear pore and COPII coat complex component     |
| <b>O60613</b>     | SELENOF  | -0.404 | selenoprotein F                                                  |
| <b>Q9BQE4</b>     | SELENOS  | -0.302 | selenoprotein S                                                  |
| <b>O75326-1</b>   | SEMA7A   | -0.549 | semaphorin 7A (John Milton Hagen blood group)                    |
| <b>Q9UHD8-1</b>   | SEPTIN9  | -0.132 | septin 9                                                         |
| <b>P05543</b>     | SERPINA7 | -0.492 | serpin family A member 7                                         |
| <b>P05121</b>     | SERPINE1 | -0.73  | serpin family E member 1                                         |
| <b>P36955</b>     | SERPINF1 | -0.687 | serpin family F member 1                                         |
| <b>Q01105</b>     | SET      | 0.329  | SET nuclear proto-oncogene                                       |
| <b>Q15459</b>     | SF3A1    | 0.22   | splicing factor 3a subunit 1                                     |
| <b>Q15428</b>     | SF3A2    | 0.28   | splicing factor 3a subunit 2                                     |
| <b>Q12874</b>     | SF3A3    | 0.261  | splicing factor 3a subunit 3                                     |
| <b>Q13435</b>     | SF3B2    | 0.241  | splicing factor 3b subunit 2                                     |
| <b>P23246</b>     | SFPQ     | 0.177  | splicing factor proline and glutamine rich                       |
| <b>Q9H9B4</b>     | SFXN1    | 0.235  | sideroflexin 1                                                   |
| <b>A0A0A0MS41</b> | SFXN3    | 0.187  | sideroflexin 3                                                   |
| <b>O95470</b>     | SGPL1    | 0.213  | sphingosine-1-phosphate lyase 1                                  |
| <b>Q9H788</b>     | SH2D4A   | -0.283 | SH2 domain containing 4A                                         |
| <b>Q9Y371</b>     | SH3GLB1  | -0.234 | SH3 domain containing GRB2 like, endophilin B1                   |
| <b>Q726J0</b>     | SH3RF1   | -0.762 | SH3 domain containing ring finger 1                              |
| <b>Q8NEM2</b>     | SHCBP1   | 0.313  | SHC binding and spindle associated 1                             |
| <b>P34897-1</b>   | SHMT2    | 0.226  | serine hydroxymethyltransferase 2                                |
| <b>Q9H173</b>     | SIL1     | -0.577 | SIL1 nucleotide exchange factor                                  |
| <b>O43166-2</b>   | SIPA1L1  | -0.23  | signal induced proliferation associated 1 like 1                 |
| <b>O60292</b>     | SIPA1L3  | -0.416 | signal induced proliferation associated 1 like 3                 |
| <b>Q96EB6</b>     | SIRT1    | 0.328  | sirtuin 1                                                        |
| <b>Q8IXJ6</b>     | SIRT2    | -0.156 | sirtuin 2                                                        |
| <b>Q14493</b>     | SLBP     | 0.331  | stem-loop binding protein                                        |
| <b>Q8WUM9</b>     | SLC20A1  | -0.313 | solute carrier family 20 member 1                                |
| <b>P53007</b>     | SLC25A1  | 0.248  | solute carrier family 25 member 1                                |

|                 |          |        |                                                                                                 |
|-----------------|----------|--------|-------------------------------------------------------------------------------------------------|
| <b>Q00325-2</b> | SLC25A3  | 0.323  | solute carrier family 25 member 3                                                               |
| <b>P05141</b>   | SLC25A5  | 0.339  | solute carrier family 25 member 5                                                               |
| <b>P12236</b>   | SLC25A6  | 0.236  | solute carrier family 25 member 6                                                               |
| <b>P11169</b>   | SLC2A3   | 0.241  | solute carrier family 2 member 3                                                                |
| <b>Q9Y6M5</b>   | SLC30A1  | 0.589  | solute carrier family 30 member 1                                                               |
| <b>Q8TB61</b>   | SLC35B2  | 0.131  | solute carrier family 35 member B2                                                              |
| <b>Q9H2H9</b>   | SLC38A1  | -0.352 | solute carrier family 38 member 1                                                               |
| <b>Q96QD8</b>   | SLC38A2  | -0.368 | solute carrier family 38 member 2                                                               |
| <b>Q8WUX1-1</b> | SLC38A5  | -0.169 | solute carrier family 38 member 5                                                               |
| <b>Q8IWA5-2</b> | SLC44A2  | 0.357  | solute carrier family 44 member 2                                                               |
| <b>Q9Y6M7-7</b> | SLC4A7   | -0.144 | solute carrier family 4 member 7                                                                |
| <b>P30825</b>   | SLC7A1   | -0.143 | solute carrier family 7 member 1                                                                |
| <b>P52569-3</b> | SLC7A2   | -0.319 | solute carrier family 7 member 2                                                                |
| <b>O14745</b>   | SLC9A3R1 | -0.153 | SLC9A3 regulator 1                                                                              |
| <b>Q15599-2</b> | SLC9A3R2 | 0.124  | SLC9A3 regulator 2                                                                              |
| <b>Q08AF3-1</b> | SLFN5    | 0.271  | schlafen family member 5                                                                        |
| <b>Q9NWH9-1</b> | SLTM     | 0.159  | SAFB like transcription modulator                                                               |
| <b>O95391</b>   | SLU7     | 0.328  | SLU7 homolog, splicing factor                                                                   |
| <b>P84022</b>   | SMAD3    | -0.273 | SMAD family member 3                                                                            |
| <b>Q92922</b>   | SMARCC1  | -0.276 | SWI/SNF related, matrix associated, actin dependent regulator of chromatin subfamily c member 1 |
| <b>P17405-1</b> | SMPD1    | 0.197  | sphingomyelin phosphodiesterase 1                                                               |
| <b>P52788</b>   | SMS      | -0.156 | spermine synthase                                                                               |
| <b>P53814-5</b> | SMTN     | 0.457  | smoothelin                                                                                      |
| <b>Q2TAY7</b>   | SMU1     | 0.188  | SMU1 DNA replication regulator and spliceosomal factor                                          |
| <b>Q9HAU4</b>   | SMURF2   | -0.313 | SMAD specific E3 ubiquitin protein ligase 2                                                     |
| <b>Q9H7B4</b>   | SMYD3    | -0.534 | SET and MYND domain containing 3                                                                |
| <b>Q7KZF4</b>   | SND1     | -0.277 | staphylococcal nuclease and tudor domain containing 1                                           |
| <b>Q8TAD8</b>   | SNIP1    | 0.241  | Smad nuclear interacting protein 1                                                              |
| <b>P62306</b>   | SNRPF    | 0.448  | small nuclear ribonucleoprotein polypeptide F                                                   |
| <b>P62308</b>   | SNRPG    | 0.414  | small nuclear ribonucleoprotein polypeptide G                                                   |
| <b>Q13573</b>   | SNW1     | 0.226  | SNW domain containing 1                                                                         |
| <b>Q15036-1</b> | SNX17    | -0.257 | sorting nexin 17                                                                                |
| <b>Q96L92</b>   | SNX27    | -0.244 | sorting nexin 27                                                                                |
| <b>P04179</b>   | SOD2     | 0.358  | superoxide dismutase 2                                                                          |
| <b>P18583-5</b> | SON      | 0.241  | SON DNA binding protein                                                                         |
| <b>Q99523</b>   | SORT1    | -0.847 | sortilin 1                                                                                      |
| <b>Q53LP3</b>   | SOWAHC   | 0.195  | sosondowah ankyrin repeat domain family member C                                                |
| <b>Q02447-1</b> | SP3      | 0.443  | Sp3 transcription factor                                                                        |
| <b>P09486</b>   | SPARC    | -0.166 | secreted protein acidic and cysteine rich                                                       |
| <b>Q8NB90-1</b> | SPATA5   | -0.279 | spermatogenesis associated 5                                                                    |
| <b>Q86XZ4</b>   | SPATS2   | -0.244 | spermatogenesis associated serine rich 2                                                        |
| <b>Q9HBM1</b>   | SPC25    | -0.232 | SPC25 component of NDC80 kinetochore complex                                                    |
| <b>Q96T58</b>   | SPEN     | 0.16   | spen family transcriptional repressor                                                           |
| <b>Q9UQ90</b>   | SPG7     | 0.151  | SPG7 matrix AAA peptidase subunit, paraplegin                                                   |
| <b>Q08AE8</b>   | SPIRE1   | -0.198 | spire type actin nucleation factor 1                                                            |
| <b>P35270</b>   | SPR      | 0.178  | sepiapterin reductase                                                                           |
| <b>Q13813</b>   | SPTAN1   | -0.304 | spectrin alpha, non-erythrocytic 1                                                              |

|                 |         |        |                                                                       |
|-----------------|---------|--------|-----------------------------------------------------------------------|
| <b>Q01082-1</b> | SPTBN1  | -0.179 | spectrin beta, non-erythrocytic 1                                     |
| <b>Q68D10</b>   | SPTY2D1 | 0.472  | SPT2 chromatin protein domain containing 1                            |
| <b>Q8WXA9-2</b> | SREK1   | 0.163  | splicing regulatory glutamic acid and lysine rich protein 1           |
| <b>Q7Z6B7</b>   | SRGAP1  | -0.431 | SLIT-ROBO Rho GTPase activating protein 1                             |
| <b>O75044</b>   | SRGAP2  | -0.287 | SLIT-ROBO Rho GTPase activating protein 2                             |
| <b>P49458</b>   | SRP9    | 0.318  | signal recognition particle 9                                         |
| <b>Q96SB4-3</b> | SRPK1   | -0.277 | SRSF protein kinase 1                                                 |
| <b>Q9Y5M8</b>   | SRPRB   | 0.172  | SRP receptor subunit beta                                             |
| <b>Q9BXP5</b>   | SRRT    | 0.288  | serrate, RNA effector molecule                                        |
| <b>Q05519</b>   | SRSF11  | 0.188  | serine and arginine rich splicing factor 11                           |
| <b>Q08170</b>   | SRSF4   | 0.324  | serine and arginine rich splicing factor 4                            |
| <b>Q13243</b>   | SRSF5   | 0.195  | serine and arginine rich splicing factor 5                            |
| <b>Q13247</b>   | SRSF6   | 0.245  | serine and arginine rich splicing factor 6                            |
| <b>P05455</b>   | SSB     | 0.235  | small RNA binding exonuclease protection factor La                    |
| <b>Q04837</b>   | SSBP1   | 0.34   | single stranded DNA binding protein 1                                 |
| <b>Q9UNL2-2</b> | SSR3    | 0.39   | signal sequence receptor subunit 3                                    |
| <b>O75886</b>   | STAM2   | -0.191 | signal transducing adaptor molecule 2                                 |
| <b>P51692</b>   | STAT5B  | -0.331 | signal transducer and activator of transcription 5B                   |
| <b>O76061</b>   | STC2    | -0.617 | stanniocalcin 2                                                       |
| <b>P31948-2</b> | STIP1   | -0.179 | stress induced phosphoprotein 1                                       |
| <b>O94804</b>   | STK10   | -0.18  | serine/threonine kinase 10                                            |
| <b>Q13188-2</b> | STK3    | -0.452 | serine/threonine kinase 3                                             |
| <b>Q9UEW8</b>   | STK39   | -0.345 | serine/threonine kinase 39                                            |
| <b>P27105</b>   | STOM    | 0.312  | stomatin                                                              |
| <b>O43752</b>   | STX6    | 0.165  | syntaxin 6                                                            |
| <b>Q9UNK0</b>   | STX8    | -0.471 | syntaxin 8                                                            |
| <b>O00186</b>   | STXBP3  | 0.249  | syntaxin binding protein 3                                            |
| <b>Q5T5C0-1</b> | STXBP5  | -0.224 | syntaxin binding protein 5                                            |
| <b>P53999</b>   | SUB1    | 0.438  | SUB1 regulator of transcription                                       |
| <b>P53597</b>   | SUCLG1  | 0.278  | succinate-CoA ligase alpha subunit                                    |
| <b>Q9Y5B9</b>   | SUPT16H | 0.177  | SPT16 homolog, facilitates chromatin remodeling subunit               |
| <b>O00267-2</b> | SUPT5H  | 0.21   | SPT5 homolog, DSIF elongation factor subunit                          |
| <b>Q7KZ85</b>   | SUPT6H  | 0.21   | SPT6 homolog, histone chaperone and transcription elongation factor   |
| <b>O94864-1</b> | SUPT7L  | 0.36   | SPT7 like, STAGA complex gamma subunit                                |
| <b>Q8IYB8</b>   | SUPV3L1 | 0.148  | Suv3 like RNA helicase                                                |
| <b>O75683</b>   | SURF6   | -0.214 | surfeit 6                                                             |
| <b>O95926</b>   | SYF2    | 0.519  | SYF2 pre-mRNA splicing factor                                         |
| <b>Q8NF91</b>   | SYNE1   | -0.282 | spectrin repeat containing nuclear envelope protein 1                 |
| <b>Q8WXH0-2</b> | SYNE2   | -0.363 | spectrin repeat containing nuclear envelope protein 2                 |
| <b>Q8N3V7-2</b> | SYNPO   | 0.326  | synaptopodin                                                          |
| <b>Q9Y6A5</b>   | TACC3   | 0.24   | transforming acidic coiled-coil containing protein 3                  |
| <b>Q9BSH4</b>   | TACO1   | 0.37   | translational activator of cytochrome c oxidase I                     |
| <b>P09758</b>   | TACSTD2 | 0.373  | tumor associated calcium signal transducer 2                          |
| <b>Q86TJ2</b>   | TADA2B  | 0.345  | transcriptional adaptor 2B                                            |
| <b>Q01995</b>   | TAGLN   | -0.289 | transgelin                                                            |
| <b>Q96BW9-3</b> | TAMM41  | 1.028  | TAM41 mitochondrial translocator assembly and maintenance homolog     |
| <b>Q9C0D5</b>   | TANC1   | -0.293 | tetratricopeptide repeat, ankyrin repeat and coiled-coil containing 1 |

|                 |               |        |                                                                       |
|-----------------|---------------|--------|-----------------------------------------------------------------------|
| <b>Q9HCD6-2</b> | TANC2         | -0.434 | tetratricopeptide repeat, ankyrin repeat and coiled-coil containing 2 |
| <b>Q9H2K8</b>   | TAOK3         | -0.195 | TAO kinase 3                                                          |
| <b>Q03518</b>   | TAP1          | 0.317  | transporter 1, ATP binding cassette subfamily B member                |
| <b>Q03519-1</b> | TAP2          | 0.306  | transporter 2, ATP binding cassette subfamily B member                |
| <b>O15533-3</b> | TAPBP         | 0.216  | TAP binding protein                                                   |
| <b>O14907</b>   | TAX1BP3       | -0.227 | Tax1 binding protein 3                                                |
| <b>Q9BYX2</b>   | TBC1D2        | -0.164 | TBC1 domain family member 2                                           |
| <b>Q92609-2</b> | TBC1D5        | -0.355 | TBC1 domain family member 5                                           |
| <b>Q66K14</b>   | TBC1D9B       | -0.239 | TBC1 domain family member 9B                                          |
| <b>Q9BTW9</b>   | TBCD          | -0.284 | tubulin folding cofactor D                                            |
| <b>Q15813</b>   | TBCE          | -0.327 | tubulin folding cofactor E                                            |
| <b>Q9Y4P3</b>   | TBL2          | 0.15   | transducin beta like 2                                                |
| <b>Q96EI5-2</b> | TCEAL4        | -0.194 | transcription elongation factor A like 4                              |
| <b>O14776</b>   | TCERG1        | 0.185  | transcription elongation regulator 1                                  |
| <b>Q13428-3</b> | TCOF1         | 0.261  | treacle ribosome biogenesis factor 1                                  |
| <b>Q15554</b>   | TERF2         | 0.249  | telomeric repeat binding factor 2                                     |
| <b>Q9NYB0</b>   | TERF2IP       | 0.358  | TERF2 interacting protein                                             |
| <b>Q9Y6I9</b>   | TEX264        | 0.254  | testis expressed 264, ER-phagy receptor                               |
| <b>P02787</b>   | TF            | -0.224 | transferrin                                                           |
| <b>Q00059</b>   | TFAM          | 0.398  | transcription factor A, mitochondrial                                 |
| <b>Q9H5Q4</b>   | TFB2M         | 0.124  | transcription factor B2, mitochondrial                                |
| <b>Q92734</b>   | TFG           | 0.203  | trafficking from ER to golgi regulator                                |
| <b>P02786</b>   | TFRC          | -0.266 | transferrin receptor                                                  |
| <b>P61812-2</b> | TGFB2         | -0.654 | transforming growth factor beta 2                                     |
| <b>Q15582</b>   | TGFBI         | -0.548 | transforming growth factor beta induced                               |
| <b>P37173-2</b> | TGFBR2        | -0.752 | transforming growth factor beta receptor 2                            |
| <b>P21980</b>   | TGM2          | -0.323 | transglutaminase 2                                                    |
| <b>Q6YHU6</b>   | THADA         | -0.444 | THADA armadillo repeat containing                                     |
| <b>P07996</b>   | THBS1         | -0.938 | thrombospondin 1                                                      |
| <b>P52888</b>   | THOP1         | -0.211 | thimet oligopeptidase 1                                               |
| <b>Q9Y2W1</b>   | THRAP3        | 0.21   | thyroid hormone receptor associated protein 3                         |
| <b>Q9NQ88</b>   | TIGAR         | 0.173  | TP53 induced glycolysis regulatory phosphatase                        |
| <b>Q9BVV7</b>   | TIMM21        | 0.248  | translocase of inner mitochondrial membrane 21                        |
| <b>O43615</b>   | TIMM44        | 0.244  | translocase of inner mitochondrial membrane 44                        |
| <b>P04183</b>   | TK1           | 0.78   | thymidine kinase 1                                                    |
| <b>Q9Y490</b>   | TLN1          | -0.253 | talin 1                                                               |
| <b>O60603</b>   | TLR2          | -0.277 | toll like receptor 2                                                  |
| <b>Q9UM00</b>   | TMCO1         | 0.269  | transmembrane and coiled-coil domains 1                               |
| <b>P17152</b>   | TMEM11        | 0.224  | transmembrane protein 11                                              |
| <b>Q9H330-2</b> | TMEM245       | 0.34   | transmembrane protein 245                                             |
| <b>Q96MH6</b>   | TMEM68        | -0.668 | transmembrane protein 68                                              |
| <b>P42166</b>   | TMPO          | 0.211  | thymopoietin                                                          |
| <b>P42167</b>   | TMPO          | 0.31   | thymopoietin                                                          |
| <b>P62328</b>   | TMSB10/TMSB4X | -0.693 | thymosin beta 4 X-linked                                              |
| <b>P63313</b>   | TMSB10/TMSB4X | -0.387 | thymosin beta 4 X-linked                                              |
| <b>P24821</b>   | TNC           | -0.768 | tenascin C                                                            |
| <b>Q03169</b>   | TNFAIP2       | 0.345  | TNF alpha induced protein 2                                           |

|                 |           |        |                                                           |
|-----------------|-----------|--------|-----------------------------------------------------------|
| <b>O00220</b>   | TNFRSF10A | 0.201  | TNF receptor superfamily member 10a                       |
| <b>O14763</b>   | TNFRSF10B | 0.313  | TNF receptor superfamily member 10b                       |
| <b>Q9NP84</b>   | TNFRSF12A | -0.278 | TNF receptor superfamily member 12A                       |
| <b>Q15025</b>   | TNIP1     | -0.494 | TNFAIP3 interacting protein 1                             |
| <b>Q9HBL0</b>   | TNS1      | -0.242 | tensin 1                                                  |
| <b>Q68CZ2-1</b> | TNS3      | -0.234 | tensin 3                                                  |
| <b>Q8IZW8</b>   | TNS4      | -0.399 | tensin 4                                                  |
| <b>P11388-4</b> | TOP2A     | 0.358  | DNA topoisomerase II alpha                                |
| <b>Q92547</b>   | TOPBP1    | 0.227  | DNA topoisomerase II binding protein 1                    |
| <b>Q5JTV8</b>   | TOR1AIP1  | 0.181  | torsin 1A interacting protein 1                           |
| <b>Q8NFAQ8</b>  | TOR1AIP2  | 0.151  | torsin 1A interacting protein 2                           |
| <b>Q9NXH8</b>   | TOR4A     | 0.209  | torsin family 4 member A                                  |
| <b>P04637</b>   | TP53      | 0.171  | tumor protein p53                                         |
| <b>Q16890</b>   | TPD52L1   | -0.203 | TPD52 like 1                                              |
| <b>P60174</b>   | TPI1      | 0.234  | triosephosphate isomerase 1                               |
| <b>P07951</b>   | TPM2      | -0.585 | tropomyosin 2                                             |
| <b>P07951-2</b> | TPM2      | -0.227 | tropomyosin 2                                             |
| <b>P67936</b>   | TPM4      | -0.166 | tropomyosin 4                                             |
| <b>P12270</b>   | TPR       | 0.178  | translocated promoter region, nuclear basket protein      |
| <b>Q9ULW0</b>   | TPX2      | 0.309  | TPX2 microtubule nucleation factor                        |
| <b>Q13595</b>   | TRA2A     | 0.242  | transformer 2 alpha homolog                               |
| <b>O43715</b>   | TRIAP1    | 0.359  | TP53 regulated inhibitor of apoptosis 1                   |
| <b>P19474</b>   | TRIM21    | 0.314  | tripartite motif containing 21                            |
| <b>Q8IYM9-1</b> | TRIM22    | 0.55   | tripartite motif containing 22                            |
| <b>Q13263</b>   | TRIM28    | 0.325  | tripartite motif containing 28                            |
| <b>O75962-1</b> | TRIO      | -0.262 | trio Rho guanine nucleotide exchange factor               |
| <b>Q15650</b>   | TRIP4     | -0.361 | thyroid hormone receptor interactor 4                     |
| <b>Q7L0Y3</b>   | TRMT10C   | 0.223  | tRNA methyltransferase 10C, mitochondrial RNase P subunit |
| <b>Q96Q11</b>   | TRNT1     | 0.15   | tRNA nucleotidyl transferase 1                            |
| <b>Q16762</b>   | TST       | 0.307  | thiosulfate sulfurtransferase                             |
| <b>Q6P3X3</b>   | TTC27     | -0.374 | tetratricopeptide repeat domain 27                        |
| <b>Q9C0H2-4</b> | TTYH3     | 0.454  | tweety family member 3                                    |
| <b>Q13509</b>   | TUBB3     | 0.198  | tubulin beta 3 class III                                  |
| <b>P49411</b>   | TUFM      | 0.223  | Tu translation elongation factor, mitochondrial           |
| <b>Q9H6E5</b>   | TUT1      | 0.219  | terminal uridylyl transferase 1, U6 snRNA-specific        |
| <b>Q12792</b>   | TWF1      | -0.189 | twinfilin actin binding protein 1                         |
| <b>P40222</b>   | TXLNA     | 0.142  | taxilin alpha                                             |
| <b>Q8NBS9-1</b> | TXNDC5    | 0.28   | thioredoxin domain containing 5                           |
| <b>P83876</b>   | TXNL4A    | -0.277 | thioredoxin like 4A                                       |
| <b>Q9NNW7</b>   | TXNRD2    | 0.317  | thioredoxin reductase 2                                   |
| <b>Q2T9J0</b>   | TYSND1    | 0.382  | trypsin domain containing 1                               |
| <b>Q9NV66</b>   | TYW1      | -0.445 | tRNA- $\gamma$ W synthesizing protein 1 homolog           |
| <b>Q16222-1</b> | UAP1      | -0.238 | UDP-N-acetylglucosamine pyrophosphorylase 1               |
| <b>P49459</b>   | UBE2A     | -0.234 | ubiquitin conjugating enzyme E2 A                         |
| <b>P61086</b>   | UBE2K     | -0.469 | ubiquitin conjugating enzyme E2 K                         |
| <b>P68036</b>   | UBE2L3    | -0.378 | ubiquitin conjugating enzyme E2 L3                        |
| <b>Q9C0C9</b>   | UBE2O     | -0.235 | ubiquitin conjugating enzyme E2 O                         |

|                 |         |        |                                                                    |
|-----------------|---------|--------|--------------------------------------------------------------------|
| <b>Q7Z7E8</b>   | UBE2Q1  | 0.191  | ubiquitin conjugating enzyme E2 Q1                                 |
| <b>Q16763</b>   | UBE2S   | 0.2    | ubiquitin conjugating enzyme E2 S                                  |
| <b>Q9NPD8</b>   | UBE2T   | 0.231  | ubiquitin conjugating enzyme E2 T                                  |
| <b>Q13404-1</b> | UBE2V1  | -0.394 | ubiquitin conjugating enzyme E2 V1                                 |
| <b>Q15819</b>   | UBE2V2  | -0.478 | ubiquitin conjugating enzyme E2 V2                                 |
| <b>O95155-4</b> | UBE4B   | -0.271 | ubiquitination factor E4B                                          |
| <b>P11441</b>   | UBL4A   | 0.167  | ubiquitin like 4A                                                  |
| <b>Q9BZL1</b>   | UBL5    | -0.406 | ubiquitin like 5                                                   |
| <b>Q5T4S7-2</b> | UBR4    | -0.191 | ubiquitin protein ligase E3 component n-recognin 4                 |
| <b>P09936</b>   | UCHL1   | -0.181 | ubiquitin C-terminal hydrolase L1                                  |
| <b>P15374</b>   | UCHL3   | -0.191 | ubiquitin C-terminal hydrolase L3                                  |
| <b>Q8IX04</b>   | UEVLD   | -0.239 | UEV and lactate/malate dehydrogenase domains                       |
| <b>O94874</b>   | UFL1    | 0.205  | UFM1 specific ligase 1                                             |
| <b>Q9NUQ7</b>   | UFSP2   | 0.155  | UFM1 specific peptidase 2                                          |
| <b>Q16739</b>   | UGCG    | -0.31  | UDP-glucose ceramide glucosyltransferase                           |
| <b>Q96T88-2</b> | UHRF1   | -0.292 | ubiquitin like with PHD and ring finger domains 1                  |
| <b>Q96RL1</b>   | UIMC1   | -0.257 | ubiquitin interaction motif containing 1                           |
| <b>O14795-2</b> | UNC13B  | -0.786 | unc-13 homolog B                                                   |
| <b>Q70J99-3</b> | UNC13D  | -0.271 | unc-13 homolog D                                                   |
| <b>Q9UDW1</b>   | UQCR10  | 0.544  | ubiquinol-cytochrome c reductase, complex III subunit X            |
| <b>P14927</b>   | UQCRB   | 0.315  | ubiquinol-cytochrome c reductase binding protein                   |
| <b>P31930</b>   | UQCRC1  | 0.126  | ubiquinol-cytochrome c reductase core protein 1                    |
| <b>P22695</b>   | UQCRC2  | 0.234  | ubiquinol-cytochrome c reductase core protein 2                    |
| <b>P47985</b>   | UQCRCF1 | 0.144  | ubiquinol-cytochrome c reductase, Rieske iron-sulfur polypeptide 1 |
| <b>P07919</b>   | UQCRH   | 0.28   | ubiquinol-cytochrome c reductase hinge protein                     |
| <b>O94763</b>   | URI1    | -0.219 | URI1 prefoldin like chaperone                                      |
| <b>Q9UPU5</b>   | USP24   | -0.196 | ubiquitin specific peptidase 24                                    |
| <b>Q8NFA0</b>   | USP32   | -0.298 | ubiquitin specific peptidase 32                                    |
| <b>Q13107-1</b> | USP4    | -0.169 | ubiquitin specific peptidase 4                                     |
| <b>P40818</b>   | USP8    | -0.141 | ubiquitin specific peptidase 8                                     |
| <b>Q93008</b>   | USP9X   | -0.302 | ubiquitin specific peptidase 9 X-linked                            |
| <b>Q9BVJ6-1</b> | UTP14A  | -0.326 | UTP14A small subunit processome component                          |
| <b>O75691</b>   | UTP20   | -0.26  | UTP20 small subunit processome component                           |
| <b>Q9NQZ2</b>   | UTP3    | 0.262  | UTP3 small subunit processome component                            |
| <b>P46939</b>   | UTRN    | -0.318 | utrophin                                                           |
| <b>Q5ST30-4</b> | VARS2   | 0.257  | valyl-tRNA synthetase 2, mitochondrial                             |
| <b>P52735</b>   | VAV2    | -0.422 | vav guanine nucleotide exchange factor 2                           |
| <b>P19320</b>   | VCAM1   | -0.786 | vascular cell adhesion molecule 1                                  |
| <b>P13611</b>   | VCAN    | -0.454 | versican                                                           |
| <b>P18206</b>   | VCL     | -0.387 | vinculin                                                           |
| <b>P21796</b>   | VDAC1   | 0.164  | voltage dependent anion channel 1                                  |
| <b>P45880-1</b> | VDAC2   | 0.244  | voltage dependent anion channel 2                                  |
| <b>Q9Y277</b>   | VDAC3   | 0.332  | voltage dependent anion channel 3                                  |
| <b>Q9HBM0-1</b> | VEZT    | -0.548 | vezatin, adherens junctions transmembrane protein                  |
| <b>Q96GC9</b>   | VMP1    | 0.162  | vacuole membrane protein 1                                         |
| <b>Q709C8</b>   | VPS13C  | -0.237 | vacuolar protein sorting 13 homolog C                              |
| <b>Q7Z3J2-1</b> | VPS35L  | -0.165 | VPS35 endosomal protein sorting factor like                        |

|                 |         |        |                                                                              |
|-----------------|---------|--------|------------------------------------------------------------------------------|
| <b>P49754</b>   | VPS41   | -0.244 | VPS41 subunit of HOPS complex                                                |
| <b>Q5VIR6-4</b> | VPS53   | -0.267 | VPS53 subunit of GARP complex                                                |
| <b>Q96AJ9</b>   | VTI1A   | -0.406 | vesicle transport through interaction with t-SNAREs 1A                       |
| <b>P04004</b>   | VTN     | -0.84  | vitronectin                                                                  |
| <b>O00401</b>   | WASL    | -0.173 | WASP like actin nucleation promoting factor                                  |
| <b>Q9Y2W2</b>   | WBP11   | 0.388  | WW domain binding protein 11                                                 |
| <b>Q969T9</b>   | WBP2    | -0.275 | WW domain binding protein 2                                                  |
| <b>Q9NW82</b>   | WDR70   | -0.265 | WD repeat domain 70                                                          |
| <b>Q6UXN9</b>   | WDR82   | 0.253  | WD repeat domain 82                                                          |
| <b>Q5T9L3-2</b> | WLS     | -0.225 | Wnt ligand secretion mediator                                                |
| <b>Q96S55</b>   | WRNIP1  | 0.18   | WRN helicase interacting protein 1                                           |
| <b>O00308</b>   | WWP2    | -0.592 | WW domain containing E3 ubiquitin protein ligase 2                           |
| <b>Q9HCS7</b>   | XAB2    | 0.195  | XPA binding protein 2                                                        |
| <b>P98170</b>   | XIAP    | -0.363 | X-linked inhibitor of apoptosis                                              |
| <b>Q01831</b>   | XPC     | 0.652  | XPC complex subunit, DNA damage recognition and repair factor                |
| <b>Q9C0E2</b>   | XPO4    | -0.218 | exportin 4                                                                   |
| <b>Q96QU8</b>   | XPO6    | -0.213 | exportin 6                                                                   |
| <b>Q9Y2Z4</b>   | YARS2   | 0.147  | tyrosyl-tRNA synthetase 2                                                    |
| <b>Q5BJH7</b>   | YIF1B   | 0.202  | Yip1 interacting factor homolog B, membrane trafficking protein              |
| <b>Q9Y5A9</b>   | YTHDF2  | -0.209 | YTH N6-methyladenosine RNA binding protein 2                                 |
| <b>P61981</b>   | YWHAG   | -0.243 | tyrosine 3-monooxygenase/tryptophan 5-monooxygenase activation protein gamma |
| <b>P63104</b>   | YWHAZ   | -0.18  | tyrosine 3-monooxygenase/tryptophan 5-monooxygenase activation protein zeta  |
| <b>Q8N4Q0</b>   | ZADH2   | 0.166  | zinc binding alcohol dehydrogenase domain containing 2                       |
| <b>O96006</b>   | ZBED1   | 0.352  | zinc finger BED-type containing 1                                            |
| <b>O75152</b>   | ZC3H11A | 0.325  | zinc finger CCCH-type containing 11A                                         |
| <b>Q86VM9</b>   | ZC3H18  | 0.173  | zinc finger CCCH-type containing 18                                          |
| <b>Q8IUH4</b>   | ZDHHC13 | 0.249  | zinc finger DHHC-type containing 13                                          |
| <b>O60293</b>   | ZFC3H1  | 0.187  | zinc finger C3H1-type containing                                             |
| <b>P17028-1</b> | ZNF24   | 0.351  | zinc finger protein 24                                                       |
| <b>Q9Y2X9</b>   | ZNF281  | 0.258  | zinc finger protein 281                                                      |
| <b>Q8TF68-2</b> | ZNF384  | 0.888  | zinc finger protein 384                                                      |
| <b>Q96NB3</b>   | ZNF830  | 0.296  | zinc finger protein 830                                                      |
| <b>O75312</b>   | ZPR1    | -0.197 | ZPR1 zinc finger                                                             |
| <b>O43149</b>   | ZZEF1   | -0.273 | zinc finger ZZ-type and EF-hand domain containing 1                          |
| <b>P62805</b>   |         | 0.268  |                                                                              |
| <b>P69905</b>   |         | -0.552 |                                                                              |
| <b>P84243</b>   |         | 0.19   |                                                                              |
